# Supplementary material for: One Health Perspective of Antibiotic Resistance in Enterobacterales from Southeast Asia: A Systematic Review and Meta-analysis
Source: Research Square preprint supplement (doi:10.21203/rs.3.rs-7626053/v1), 2025-10-24
Supplement: Supplementary file 1 [file 606d9c13c773740b2600ed79.xlsx]

## Sheet: Table S1
Title	Authors	Published Year	Study	Sector	Study Period (StartDate/EndDate)	Country	Setting Category	Sample Category	Bacteria	Antibiotic	Prev% (Prevalence Percentage)	Resistant isolates (n)	Isolates (N)
Antibiotic resistance of Escherichia coli from the milk of Ettawa crossbred dairy goats in Blitar Regency, East Java, Indonesia	Agatha, T. M.; Wibawati, P. A.; Izulhaq, R. I.; Agustono, B.; Prastiya, R. A.; Wardhana, D. K.; Abdramanov, A.; Lokapirnasari, W. P.; Lamid, M.	2023	Agatha 2023	food	from March 2022 to May 2024	Indonesia	livestock farms	Dairy	Escherichia coli	Streptomycin	0.12	4	34
Antibiotic resistance of Escherichia coli from the milk of Ettawa crossbred dairy goats in Blitar Regency, East Java, Indonesia	Agatha, T. M.; Wibawati, P. A.; Izulhaq, R. I.; Agustono, B.; Prastiya, R. A.; Wardhana, D. K.; Abdramanov, A.; Lokapirnasari, W. P.; Lamid, M.	2023	Agatha 2023	food	from March 2022 to May 2023	Indonesia	livestock farms	Dairy	Escherichia coli	Trimethoprim	0.03	1	34
Risk factors and spatial distribution of extended spectrum 尾-lactamase-producing- Escherichia coli at retail poultry meat markets in Malaysia: a cross-sectional study	Aliyu, A. B.; Saleha, A. A.; Jalila, A.; Zunita, Z.	2016	Aliyu 2016	animal	from 1/6/2018 to 30/9/2018	Malaysia	poultry farms	Food samples	Escherichia coli	ESBLs	0.488	117	240
Characterisation of Salmonella Enteritidis ST11 and ST1925 Associated with Human Intestinal and Extra-Intestinal Infections in Singapore	Aung, K. T.; Khor, W. C.; Ong, K. H.; Tan, W. L.; Wong, Z. N.; Oh, J. Q.; Wong, W. K.; Tan, B. Z. Y.; Maiwald, M.; Tee, N. W. S.; Barkham, T.; Koh, T. H.; Dalsgaard, A.; Chen, S. L.; Schlundt, J.; Ng, L. C.	2022	Aung 2022	human	2016-2017	Singapore	hospital	Clinical samples	Salmonella spp.	Amoxicillin/clavulanic acid	0.0117	2.8782	246
Characterisation of Salmonella Enteritidis ST11 and ST1925 Associated with Human Intestinal and Extra-Intestinal Infections in Singapore	Aung, K. T.; Khor, W. C.; Ong, K. H.; Tan, W. L.; Wong, Z. N.; Oh, J. Q.; Wong, W. K.; Tan, B. Z. Y.; Maiwald, M.; Tee, N. W. S.; Barkham, T.; Koh, T. H.; Dalsgaard, A.; Chen, S. L.; Schlundt, J.; Ng, L. C.	2022	Aung 2022	human	2016-2017	Singapore	hospital	Clinical samples	Salmonella spp.	Ampicilin/sulbactam	0.1268	31.1928	246
Characterisation of Salmonella Enteritidis ST11 and ST1925 Associated with Human Intestinal and Extra-Intestinal Infections in Singapore	Aung, K. T.; Khor, W. C.; Ong, K. H.; Tan, W. L.; Wong, Z. N.; Oh, J. Q.; Wong, W. K.; Tan, B. Z. Y.; Maiwald, M.; Tee, N. W. S.; Barkham, T.; Koh, T. H.; Dalsgaard, A.; Chen, S. L.; Schlundt, J.; Ng, L. C.	2022	Aung 2022	food	2016-2017	Singapore	national database	Food samples	Salmonella spp.	Ampicilin/sulbactam	0.3298	8.9046	27
Characterisation of Salmonella Enteritidis ST11 and ST1925 Associated with Human Intestinal and Extra-Intestinal Infections in Singapore	Aung, K. T.; Khor, W. C.; Ong, K. H.; Tan, W. L.; Wong, Z. N.; Oh, J. Q.; Wong, W. K.; Tan, B. Z. Y.; Maiwald, M.; Tee, N. W. S.; Barkham, T.; Koh, T. H.; Dalsgaard, A.; Chen, S. L.; Schlundt, J.; Ng, L. C.	2022	Aung 2022	human	2016-2017	Singapore	hospital	Clinical samples	Salmonella spp.	Ampicillin	0.1678	41.2788	246
Characterisation of Salmonella Enteritidis ST11 and ST1925 Associated with Human Intestinal and Extra-Intestinal Infections in Singapore	Aung, K. T.; Khor, W. C.; Ong, K. H.; Tan, W. L.; Wong, Z. N.; Oh, J. Q.; Wong, W. K.; Tan, B. Z. Y.; Maiwald, M.; Tee, N. W. S.; Barkham, T.; Koh, T. H.; Dalsgaard, A.; Chen, S. L.; Schlundt, J.; Ng, L. C.	2022	Aung 2022	food	2016-2017	Singapore	national database	Food samples	Salmonella spp.	Ampicillin	0.1112	3.0024	27
Characterisation of Salmonella Enteritidis ST11 and ST1925 Associated with Human Intestinal and Extra-Intestinal Infections in Singapore	Aung, K. T.; Khor, W. C.; Ong, K. H.; Tan, W. L.; Wong, Z. N.; Oh, J. Q.; Wong, W. K.; Tan, B. Z. Y.; Maiwald, M.; Tee, N. W. S.; Barkham, T.; Koh, T. H.; Dalsgaard, A.; Chen, S. L.; Schlundt, J.; Ng, L. C.	2022	Aung 2022	human	2016-2017	Singapore	hospital	Clinical samples	Salmonella spp.	Aztreonam	0.0117	2.8782	246
Characterisation of Salmonella Enteritidis ST11 and ST1925 Associated with Human Intestinal and Extra-Intestinal Infections in Singapore	Aung, K. T.; Khor, W. C.; Ong, K. H.; Tan, W. L.; Wong, Z. N.; Oh, J. Q.; Wong, W. K.; Tan, B. Z. Y.; Maiwald, M.; Tee, N. W. S.; Barkham, T.; Koh, T. H.; Dalsgaard, A.; Chen, S. L.; Schlundt, J.; Ng, L. C.	2022	Aung 2022	human	2016-2017	Singapore	hospital	Clinical samples	Salmonella spp.	Cefepime	0.0059	1.4514	246
Characterisation of Salmonella Enteritidis ST11 and ST1925 Associated with Human Intestinal and Extra-Intestinal Infections in Singapore	Aung, K. T.; Khor, W. C.; Ong, K. H.; Tan, W. L.; Wong, Z. N.; Oh, J. Q.; Wong, W. K.; Tan, B. Z. Y.; Maiwald, M.; Tee, N. W. S.; Barkham, T.; Koh, T. H.; Dalsgaard, A.; Chen, S. L.; Schlundt, J.; Ng, L. C.	2022	Aung 2022	human	2016-2017	Singapore	hospital	Clinical samples	Salmonella spp.	Cefotaxime	0.0215	5.289	246
Characterisation of Salmonella Enteritidis ST11 and ST1925 Associated with Human Intestinal and Extra-Intestinal Infections in Singapore	Aung, K. T.; Khor, W. C.; Ong, K. H.; Tan, W. L.; Wong, Z. N.; Oh, J. Q.; Wong, W. K.; Tan, B. Z. Y.; Maiwald, M.; Tee, N. W. S.; Barkham, T.; Koh, T. H.; Dalsgaard, A.; Chen, S. L.; Schlundt, J.; Ng, L. C.	2022	Aung 2022	food	2016-2017	Singapore	national database	Food samples	Salmonella spp.	Cefotaxime	0.0371	1.0017	27
Characterisation of Salmonella Enteritidis ST11 and ST1925 Associated with Human Intestinal and Extra-Intestinal Infections in Singapore	Aung, K. T.; Khor, W. C.; Ong, K. H.; Tan, W. L.; Wong, Z. N.; Oh, J. Q.; Wong, W. K.; Tan, B. Z. Y.; Maiwald, M.; Tee, N. W. S.; Barkham, T.; Koh, T. H.; Dalsgaard, A.; Chen, S. L.; Schlundt, J.; Ng, L. C.	2022	Aung 2022	human	2016-2017	Singapore	hospital	Clinical samples	Salmonella spp.	Cefoxitin	0.0117	2.8782	246
Characterisation of Salmonella Enteritidis ST11 and ST1925 Associated with Human Intestinal and Extra-Intestinal Infections in Singapore	Aung, K. T.; Khor, W. C.; Ong, K. H.; Tan, W. L.; Wong, Z. N.; Oh, J. Q.; Wong, W. K.; Tan, B. Z. Y.; Maiwald, M.; Tee, N. W. S.; Barkham, T.; Koh, T. H.; Dalsgaard, A.; Chen, S. L.; Schlundt, J.; Ng, L. C.	2022	Aung 2022	human	2016-2017	Singapore	hospital	Clinical samples	Salmonella spp.	Ceftazidime	0.0215	5.289	246
Characterisation of Salmonella Enteritidis ST11 and ST1925 Associated with Human Intestinal and Extra-Intestinal Infections in Singapore	Aung, K. T.; Khor, W. C.; Ong, K. H.; Tan, W. L.; Wong, Z. N.; Oh, J. Q.; Wong, W. K.; Tan, B. Z. Y.; Maiwald, M.; Tee, N. W. S.; Barkham, T.; Koh, T. H.; Dalsgaard, A.; Chen, S. L.; Schlundt, J.; Ng, L. C.	2022	Aung 2022	human	2016-2017	Singapore	hospital	Clinical samples	Salmonella spp.	Cefuroxime	0.0215	5.289	246
Characterisation of Salmonella Enteritidis ST11 and ST1925 Associated with Human Intestinal and Extra-Intestinal Infections in Singapore	Aung, K. T.; Khor, W. C.; Ong, K. H.; Tan, W. L.; Wong, Z. N.; Oh, J. Q.; Wong, W. K.; Tan, B. Z. Y.; Maiwald, M.; Tee, N. W. S.; Barkham, T.; Koh, T. H.; Dalsgaard, A.; Chen, S. L.; Schlundt, J.; Ng, L. C.	2022	Aung 2022	human	2016-2017	Singapore	hospital	Clinical samples	Salmonella spp.	Fosfomycin	0.0058	1.4268	246
Characterisation of Salmonella Enteritidis ST11 and ST1925 Associated with Human Intestinal and Extra-Intestinal Infections in Singapore	Aung, K. T.; Khor, W. C.; Ong, K. H.; Tan, W. L.; Wong, Z. N.; Oh, J. Q.; Wong, W. K.; Tan, B. Z. Y.; Maiwald, M.; Tee, N. W. S.; Barkham, T.; Koh, T. H.; Dalsgaard, A.; Chen, S. L.; Schlundt, J.; Ng, L. C.	2022	Aung 2022	human	2016-2017	Singapore	hospital	Clinical samples	Salmonella spp.	Gentamicin	0.002	0.492	246
Characterisation of Salmonella Enteritidis ST11 and ST1925 Associated with Human Intestinal and Extra-Intestinal Infections in Singapore	Aung, K. T.; Khor, W. C.; Ong, K. H.; Tan, W. L.; Wong, Z. N.; Oh, J. Q.; Wong, W. K.; Tan, B. Z. Y.; Maiwald, M.; Tee, N. W. S.; Barkham, T.; Koh, T. H.; Dalsgaard, A.; Chen, S. L.; Schlundt, J.; Ng, L. C.	2022	Aung 2022	human	2016-2017	Singapore	hospital	Clinical samples	Salmonella spp.	Minocycline	0.3824	94.0704	246
Characterisation of Salmonella Enteritidis ST11 and ST1925 Associated with Human Intestinal and Extra-Intestinal Infections in Singapore	Aung, K. T.; Khor, W. C.; Ong, K. H.; Tan, W. L.; Wong, Z. N.; Oh, J. Q.; Wong, W. K.; Tan, B. Z. Y.; Maiwald, M.; Tee, N. W. S.; Barkham, T.; Koh, T. H.; Dalsgaard, A.; Chen, S. L.; Schlundt, J.; Ng, L. C.	2022	Aung 2022	food	2016-2017	Singapore	national database	Food samples	Salmonella spp.	Minocycline	0.1463	3.9501	27
Characterisation of Salmonella Enteritidis ST11 and ST1925 Associated with Human Intestinal and Extra-Intestinal Infections in Singapore	Aung, K. T.; Khor, W. C.; Ong, K. H.; Tan, W. L.; Wong, Z. N.; Oh, J. Q.; Wong, W. K.; Tan, B. Z. Y.; Maiwald, M.; Tee, N. W. S.; Barkham, T.; Koh, T. H.; Dalsgaard, A.; Chen, S. L.; Schlundt, J.; Ng, L. C.	2022	Aung 2022	human	2016-2017	Singapore	hospital	Clinical samples	Salmonella spp.	Nitrofurantoin	0.0371	9.1266	246
Characterisation of Salmonella Enteritidis ST11 and ST1925 Associated with Human Intestinal and Extra-Intestinal Infections in Singapore	Aung, K. T.; Khor, W. C.; Ong, K. H.; Tan, W. L.; Wong, Z. N.; Oh, J. Q.; Wong, W. K.; Tan, B. Z. Y.; Maiwald, M.; Tee, N. W. S.; Barkham, T.; Koh, T. H.; Dalsgaard, A.; Chen, S. L.; Schlundt, J.; Ng, L. C.	2022	Aung 2022	human	2016-2017	Singapore	hospital	Clinical samples	Salmonella spp.	Norfloxacin	0.1405	34.563	246
Characterisation of Salmonella Enteritidis ST11 and ST1925 Associated with Human Intestinal and Extra-Intestinal Infections in Singapore	Aung, K. T.; Khor, W. C.; Ong, K. H.; Tan, W. L.; Wong, Z. N.; Oh, J. Q.; Wong, W. K.; Tan, B. Z. Y.; Maiwald, M.; Tee, N. W. S.; Barkham, T.; Koh, T. H.; Dalsgaard, A.; Chen, S. L.; Schlundt, J.; Ng, L. C.	2022	Aung 2022	food	2016-2017	Singapore	national database	Food samples	Salmonella spp.	Norfloxacin	0.3707	10.0089	27
Characterisation of Salmonella Enteritidis ST11 and ST1925 Associated with Human Intestinal and Extra-Intestinal Infections in Singapore	Aung, K. T.; Khor, W. C.; Ong, K. H.; Tan, W. L.; Wong, Z. N.; Oh, J. Q.; Wong, W. K.; Tan, B. Z. Y.; Maiwald, M.; Tee, N. W. S.; Barkham, T.; Koh, T. H.; Dalsgaard, A.; Chen, S. L.; Schlundt, J.; Ng, L. C.	2022	Aung 2022	human	2016-2017	Singapore	hospital	Clinical samples	Salmonella spp.	Piperacillin	0.1307	32.1522	246
Characterisation of Salmonella Enteritidis ST11 and ST1925 Associated with Human Intestinal and Extra-Intestinal Infections in Singapore	Aung, K. T.; Khor, W. C.; Ong, K. H.; Tan, W. L.; Wong, Z. N.; Oh, J. Q.; Wong, W. K.; Tan, B. Z. Y.; Maiwald, M.; Tee, N. W. S.; Barkham, T.; Koh, T. H.; Dalsgaard, A.; Chen, S. L.; Schlundt, J.; Ng, L. C.	2022	Aung 2022	food	2016-2017	Singapore	national database	Food samples	Salmonella spp.	Piperacillin	0.3317	8.9559	27
Characterisation of Salmonella Enteritidis ST11 and ST1925 Associated with Human Intestinal and Extra-Intestinal Infections in Singapore	Aung, K. T.; Khor, W. C.; Ong, K. H.; Tan, W. L.; Wong, Z. N.; Oh, J. Q.; Wong, W. K.; Tan, B. Z. Y.; Maiwald, M.; Tee, N. W. S.; Barkham, T.; Koh, T. H.; Dalsgaard, A.; Chen, S. L.; Schlundt, J.; Ng, L. C.	2022	Aung 2022	human	2016-2017	Singapore	hospital	Clinical samples	Salmonella spp.	Tetracycline	0.5737	141.13	246
Characterisation of Salmonella Enteritidis ST11 and ST1925 Associated with Human Intestinal and Extra-Intestinal Infections in Singapore	Aung, K. T.; Khor, W. C.; Ong, K. H.; Tan, W. L.; Wong, Z. N.; Oh, J. Q.; Wong, W. K.; Tan, B. Z. Y.; Maiwald, M.; Tee, N. W. S.; Barkham, T.; Koh, T. H.; Dalsgaard, A.; Chen, S. L.; Schlundt, J.; Ng, L. C.	2022	Aung 2022	food	2016-2017	Singapore	national database	Food samples	Salmonella spp.	Tetracycline	0.2966	8.0082	27
Characterisation of Salmonella Enteritidis ST11 and ST1925 Associated with Human Intestinal and Extra-Intestinal Infections in Singapore	Aung, K. T.; Khor, W. C.; Ong, K. H.; Tan, W. L.; Wong, Z. N.; Oh, J. Q.; Wong, W. K.; Tan, B. Z. Y.; Maiwald, M.; Tee, N. W. S.; Barkham, T.; Koh, T. H.; Dalsgaard, A.; Chen, S. L.; Schlundt, J.; Ng, L. C.	2022	Aung 2022	human	2016-2017	Singapore	hospital	Clinical samples	Salmonella spp.	Tobramycin	0.002	0.492	246
Prevalence and Characterization of Quinolone-Resistance Determinants in Escherichia coli Isolated from Food-Producing Animals and Animal-Derived Food in the Philippines	Belotindos, L.; Villanueva, M.; Miguel, J., Jr.; Bwalya, P.; Harada, T.; Kawahara, R.; Nakajima, C.; Mingala, C.; Suzuki, Y.	2021	Belotindos 2021	animal	from November 2017 to July 2018	Philippines	Others	Rectal swabs	Escherichia coli	Amoxicillin/clavulanic acid	0.1	4	10
Prevalence and Characterization of Quinolone-Resistance Determinants in Escherichia coli Isolated from Food-Producing Animals and Animal-Derived Food in the Philippines	Belotindos, L.; Villanueva, M.; Miguel, J., Jr.; Bwalya, P.; Harada, T.; Kawahara, R.; Nakajima, C.; Mingala, C.; Suzuki, Y.	2021	Belotindos 2021	food	from November 2017 to July 2018	Philippines	Others	Food samples	Escherichia coli	Amoxicillin/clavulanic acid	0.114	10	188
Prevalence and Characterization of Quinolone-Resistance Determinants in Escherichia coli Isolated from Food-Producing Animals and Animal-Derived Food in the Philippines	Belotindos, L.; Villanueva, M.; Miguel, J., Jr.; Bwalya, P.; Harada, T.; Kawahara, R.; Nakajima, C.; Mingala, C.; Suzuki, Y.	2021	Belotindos 2021	food	from November 2017 to July 2018	Philippines	Others	Food samples	Escherichia coli	Amoxicillin/clavulanic acid	0.103	12	117
Prevalence and Characterization of Quinolone-Resistance Determinants in Escherichia coli Isolated from Food-Producing Animals and Animal-Derived Food in the Philippines	Belotindos, L.; Villanueva, M.; Miguel, J., Jr.; Bwalya, P.; Harada, T.; Kawahara, R.; Nakajima, C.; Mingala, C.; Suzuki, Y.	2021	Belotindos 2021	food	from November 2017 to July 2018	Philippines	Others	Food samples	Escherichia coli	Amoxicillin/clavulanic acid	0.068	6	88
Prevalence and Characterization of Quinolone-Resistance Determinants in Escherichia coli Isolated from Food-Producing Animals and Animal-Derived Food in the Philippines	Belotindos, L.; Villanueva, M.; Miguel, J., Jr.; Bwalya, P.; Harada, T.; Kawahara, R.; Nakajima, C.; Mingala, C.; Suzuki, Y.	2021	Belotindos 2021	environmental	from November 2017 to July 2018	Philippines	Others	Environmental samples	Escherichia coli	Ampicillin	0.699	51	73
Prevalence and Characterization of Quinolone-Resistance Determinants in Escherichia coli Isolated from Food-Producing Animals and Animal-Derived Food in the Philippines	Belotindos, L.; Villanueva, M.; Miguel, J., Jr.; Bwalya, P.; Harada, T.; Kawahara, R.; Nakajima, C.; Mingala, C.; Suzuki, Y.	2021	Belotindos 2021	animal	from November 2017 to July 2018	Philippines	Others	Rectal swabs	Escherichia coli	Ampicillin	0.836	46	55
Prevalence and Characterization of Quinolone-Resistance Determinants in Escherichia coli Isolated from Food-Producing Animals and Animal-Derived Food in the Philippines	Belotindos, L.; Villanueva, M.; Miguel, J., Jr.; Bwalya, P.; Harada, T.; Kawahara, R.; Nakajima, C.; Mingala, C.; Suzuki, Y.	2021	Belotindos 2021	animal	from November 2017 to July 2018	Philippines	Others	Cloacal samples	Escherichia coli	Ampicillin	0.654	34	52
Prevalence and Characterization of Quinolone-Resistance Determinants in Escherichia coli Isolated from Food-Producing Animals and Animal-Derived Food in the Philippines	Belotindos, L.; Villanueva, M.; Miguel, J., Jr.; Bwalya, P.; Harada, T.; Kawahara, R.; Nakajima, C.; Mingala, C.; Suzuki, Y.	2021	Belotindos 2021	food	from November 2017 to July 2018	Philippines	Others	Food samples	Escherichia coli	Ampicillin	0.875	7	8
Prevalence and Characterization of Quinolone-Resistance Determinants in Escherichia coli Isolated from Food-Producing Animals and Animal-Derived Food in the Philippines	Belotindos, L.; Villanueva, M.; Miguel, J., Jr.; Bwalya, P.; Harada, T.; Kawahara, R.; Nakajima, C.; Mingala, C.; Suzuki, Y.	2021	Belotindos 2021	food	from November 2017 to July 2018	Philippines	Others	Food samples	Escherichia coli	Ampicillin	0.553	104	188
Prevalence and Characterization of Quinolone-Resistance Determinants in Escherichia coli Isolated from Food-Producing Animals and Animal-Derived Food in the Philippines	Belotindos, L.; Villanueva, M.; Miguel, J., Jr.; Bwalya, P.; Harada, T.; Kawahara, R.; Nakajima, C.; Mingala, C.; Suzuki, Y.	2021	Belotindos 2021	food	from November 2017 to July 2018	Philippines	Others	Food samples	Escherichia coli	Ampicillin	0.638	143	224
Prevalence and Characterization of Quinolone-Resistance Determinants in Escherichia coli Isolated from Food-Producing Animals and Animal-Derived Food in the Philippines	Belotindos, L.; Villanueva, M.; Miguel, J., Jr.; Bwalya, P.; Harada, T.; Kawahara, R.; Nakajima, C.; Mingala, C.; Suzuki, Y.	2021	Belotindos 2021	food	from November 2017 to July 2018	Philippines	Others	Food samples	Escherichia coli	Ampicillin	0.33	63	191
Prevalence and Characterization of Quinolone-Resistance Determinants in Escherichia coli Isolated from Food-Producing Animals and Animal-Derived Food in the Philippines	Belotindos, L.; Villanueva, M.; Miguel, J., Jr.; Bwalya, P.; Harada, T.; Kawahara, R.; Nakajima, C.; Mingala, C.; Suzuki, Y.	2021	Belotindos 2021	food	from November 2017 to July 2018	Philippines	Others	Food samples	Escherichia coli	Cefepime	0.005	1	188
Prevalence and Characterization of Quinolone-Resistance Determinants in Escherichia coli Isolated from Food-Producing Animals and Animal-Derived Food in the Philippines	Belotindos, L.; Villanueva, M.; Miguel, J., Jr.; Bwalya, P.; Harada, T.; Kawahara, R.; Nakajima, C.; Mingala, C.; Suzuki, Y.	2021	Belotindos 2021	food	from November 2017 to July 2018	Philippines	Others	Food samples	Escherichia coli	Cefepime	0.027	6	224
Prevalence and Characterization of Quinolone-Resistance Determinants in Escherichia coli Isolated from Food-Producing Animals and Animal-Derived Food in the Philippines	Belotindos, L.; Villanueva, M.; Miguel, J., Jr.; Bwalya, P.; Harada, T.; Kawahara, R.; Nakajima, C.; Mingala, C.; Suzuki, Y.	2021	Belotindos 2021	food	from November 2017 to July 2018	Philippines	Others	Food samples	Escherichia coli	cefepime	0.016	3	191
Prevalence and Characterization of Quinolone-Resistance Determinants in Escherichia coli Isolated from Food-Producing Animals and Animal-Derived Food in the Philippines	Belotindos, L.; Villanueva, M.; Miguel, J., Jr.; Bwalya, P.; Harada, T.; Kawahara, R.; Nakajima, C.; Mingala, C.; Suzuki, Y.	2021	Belotindos 2021	environmental	from November 2017 to July 2018	Philippines	Others	Environmental samples	Escherichia coli	Cefepime	0.014	1	73
Prevalence and Characterization of Quinolone-Resistance Determinants in Escherichia coli Isolated from Food-Producing Animals and Animal-Derived Food in the Philippines	Belotindos, L.; Villanueva, M.; Miguel, J., Jr.; Bwalya, P.; Harada, T.; Kawahara, R.; Nakajima, C.; Mingala, C.; Suzuki, Y.	2021	Belotindos 2021	animal	from November 2017 to July 2018	Philippines	Others	Rectal swabs	Escherichia coli	Cefepime	0.055	3	55
Prevalence and Characterization of Quinolone-Resistance Determinants in Escherichia coli Isolated from Food-Producing Animals and Animal-Derived Food in the Philippines	Belotindos, L.; Villanueva, M.; Miguel, J., Jr.; Bwalya, P.; Harada, T.; Kawahara, R.; Nakajima, C.; Mingala, C.; Suzuki, Y.	2021	Belotindos 2021	animal	from November 2017 to July 2018	Philippines	Others	Cloacal samples	Escherichia coli	Cefepime	0.077	4	52
Prevalence and Characterization of Quinolone-Resistance Determinants in Escherichia coli Isolated from Food-Producing Animals and Animal-Derived Food in the Philippines	Belotindos, L.; Villanueva, M.; Miguel, J., Jr.; Bwalya, P.; Harada, T.; Kawahara, R.; Nakajima, C.; Mingala, C.; Suzuki, Y.	2021	Belotindos 2021	animal	from November 2017 to July 2018	Philippines	Others	Rectal swabs	Escherichia coli	Cefotaxime	0.2	2	10
Prevalence and Characterization of Quinolone-Resistance Determinants in Escherichia coli Isolated from Food-Producing Animals and Animal-Derived Food in the Philippines	Belotindos, L.; Villanueva, M.; Miguel, J., Jr.; Bwalya, P.; Harada, T.; Kawahara, R.; Nakajima, C.; Mingala, C.; Suzuki, Y.	2021	Belotindos 2021	animal	from November 2017 to July 2018	Philippines	Others	Cloacal samples	Escherichia coli	Cefotaxime	0.6	6	10
Prevalence and Characterization of Quinolone-Resistance Determinants in Escherichia coli Isolated from Food-Producing Animals and Animal-Derived Food in the Philippines	Belotindos, L.; Villanueva, M.; Miguel, J., Jr.; Bwalya, P.; Harada, T.; Kawahara, R.; Nakajima, C.; Mingala, C.; Suzuki, Y.	2021	Belotindos 2021	food	from November 2017 to July 2018	Philippines	Others	Food samples	Escherichia coli	Cefotaxime	0.023	2	188
Prevalence and Characterization of Quinolone-Resistance Determinants in Escherichia coli Isolated from Food-Producing Animals and Animal-Derived Food in the Philippines	Belotindos, L.; Villanueva, M.; Miguel, J., Jr.; Bwalya, P.; Harada, T.; Kawahara, R.; Nakajima, C.; Mingala, C.; Suzuki, Y.	2021	Belotindos 2021	food	from November 2017 to July 2018	Philippines	Others	Food samples	Escherichia coli	Cefotaxime	0.051	6	117
Prevalence and Characterization of Quinolone-Resistance Determinants in Escherichia coli Isolated from Food-Producing Animals and Animal-Derived Food in the Philippines	Belotindos, L.; Villanueva, M.; Miguel, J., Jr.; Bwalya, P.; Harada, T.; Kawahara, R.; Nakajima, C.; Mingala, C.; Suzuki, Y.	2021	Belotindos 2021	food	from November 2017 to July 2018	Philippines	Others	Food samples	Escherichia coli	Cefotaxime	0.045	4	88
Prevalence and Characterization of Quinolone-Resistance Determinants in Escherichia coli Isolated from Food-Producing Animals and Animal-Derived Food in the Philippines	Belotindos, L.; Villanueva, M.; Miguel, J., Jr.; Bwalya, P.; Harada, T.; Kawahara, R.; Nakajima, C.; Mingala, C.; Suzuki, Y.	2021	Belotindos 2021	food	from November 2017 to July 2018	Philippines	Others	Food samples	Escherichia coli	Cefoxitin	0.069	13	188
Prevalence and Characterization of Quinolone-Resistance Determinants in Escherichia coli Isolated from Food-Producing Animals and Animal-Derived Food in the Philippines	Belotindos, L.; Villanueva, M.; Miguel, J., Jr.; Bwalya, P.; Harada, T.; Kawahara, R.; Nakajima, C.; Mingala, C.; Suzuki, Y.	2021	Belotindos 2021	food	from November 2017 to July 2018	Philippines	Others	Food samples	Escherichia coli	Cefoxitin	0.125	28	224
Prevalence and Characterization of Quinolone-Resistance Determinants in Escherichia coli Isolated from Food-Producing Animals and Animal-Derived Food in the Philippines	Belotindos, L.; Villanueva, M.; Miguel, J., Jr.; Bwalya, P.; Harada, T.; Kawahara, R.; Nakajima, C.; Mingala, C.; Suzuki, Y.	2021	Belotindos 2021	food	from November 2017 to July 2018	Philippines	Others	Food samples	Escherichia coli	Cefoxitin	0.052	10	191
Prevalence and Characterization of Quinolone-Resistance Determinants in Escherichia coli Isolated from Food-Producing Animals and Animal-Derived Food in the Philippines	Belotindos, L.; Villanueva, M.; Miguel, J., Jr.; Bwalya, P.; Harada, T.; Kawahara, R.; Nakajima, C.; Mingala, C.; Suzuki, Y.	2021	Belotindos 2021	environmental	from November 2017 to July 2018	Philippines	Others	Environmental samples	Escherichia coli	Cefoxitin	0.041	3	73
Prevalence and Characterization of Quinolone-Resistance Determinants in Escherichia coli Isolated from Food-Producing Animals and Animal-Derived Food in the Philippines	Belotindos, L.; Villanueva, M.; Miguel, J., Jr.; Bwalya, P.; Harada, T.; Kawahara, R.; Nakajima, C.; Mingala, C.; Suzuki, Y.	2021	Belotindos 2021	animal	from November 2017 to July 2018	Philippines	Others	Rectal swabs	Escherichia coli	Cefoxitin	0.055	3	55
Prevalence and Characterization of Quinolone-Resistance Determinants in Escherichia coli Isolated from Food-Producing Animals and Animal-Derived Food in the Philippines	Belotindos, L.; Villanueva, M.; Miguel, J., Jr.; Bwalya, P.; Harada, T.; Kawahara, R.; Nakajima, C.; Mingala, C.; Suzuki, Y.	2021	Belotindos 2021	animal	from November 2017 to July 2018	Philippines	Others	Cloacal samples	Escherichia coli	Cefoxitin	0.173	9	52
Prevalence and Characterization of Quinolone-Resistance Determinants in Escherichia coli Isolated from Food-Producing Animals and Animal-Derived Food in the Philippines	Belotindos, L.; Villanueva, M.; Miguel, J., Jr.; Bwalya, P.; Harada, T.; Kawahara, R.; Nakajima, C.; Mingala, C.; Suzuki, Y.	2021	Belotindos 2021	environmental	from November 2017 to July 2018	Philippines	Others	Environmental samples	Escherichia coli	Chloramphenicol	0.548	40	73
Prevalence and Characterization of Quinolone-Resistance Determinants in Escherichia coli Isolated from Food-Producing Animals and Animal-Derived Food in the Philippines	Belotindos, L.; Villanueva, M.; Miguel, J., Jr.; Bwalya, P.; Harada, T.; Kawahara, R.; Nakajima, C.; Mingala, C.; Suzuki, Y.	2021	Belotindos 2021	animal	from November 2017 to July 2018	Philippines	Others	Rectal swabs	Escherichia coli	Chloramphenicol	0.709	39	55
Prevalence and Characterization of Quinolone-Resistance Determinants in Escherichia coli Isolated from Food-Producing Animals and Animal-Derived Food in the Philippines	Belotindos, L.; Villanueva, M.; Miguel, J., Jr.; Bwalya, P.; Harada, T.; Kawahara, R.; Nakajima, C.; Mingala, C.; Suzuki, Y.	2021	Belotindos 2021	animal	from November 2017 to July 2018	Philippines	Others	Cloacal samples	Escherichia coli	Chloramphenicol	0.308	16	52
Prevalence and Characterization of Quinolone-Resistance Determinants in Escherichia coli Isolated from Food-Producing Animals and Animal-Derived Food in the Philippines	Belotindos, L.; Villanueva, M.; Miguel, J., Jr.; Bwalya, P.; Harada, T.; Kawahara, R.; Nakajima, C.; Mingala, C.; Suzuki, Y.	2021	Belotindos 2021	food	from November 2017 to July 2018	Philippines	Others	Food samples	Escherichia coli	Chloramphenicol	0.125	1	8
Prevalence and Characterization of Quinolone-Resistance Determinants in Escherichia coli Isolated from Food-Producing Animals and Animal-Derived Food in the Philippines	Belotindos, L.; Villanueva, M.; Miguel, J., Jr.; Bwalya, P.; Harada, T.; Kawahara, R.; Nakajima, C.; Mingala, C.; Suzuki, Y.	2021	Belotindos 2021	food	from November 2017 to July 2018	Philippines	Others	Food samples	Escherichia coli	Chloramphenicol	0.346	65	188
Prevalence and Characterization of Quinolone-Resistance Determinants in Escherichia coli Isolated from Food-Producing Animals and Animal-Derived Food in the Philippines	Belotindos, L.; Villanueva, M.; Miguel, J., Jr.; Bwalya, P.; Harada, T.; Kawahara, R.; Nakajima, C.; Mingala, C.; Suzuki, Y.	2021	Belotindos 2021	food	from November 2017 to July 2018	Philippines	Others	Food samples	Escherichia coli	Chloramphenicol	0.384	86	224
Prevalence and Characterization of Quinolone-Resistance Determinants in Escherichia coli Isolated from Food-Producing Animals and Animal-Derived Food in the Philippines	Belotindos, L.; Villanueva, M.; Miguel, J., Jr.; Bwalya, P.; Harada, T.; Kawahara, R.; Nakajima, C.; Mingala, C.; Suzuki, Y.	2021	Belotindos 2021	food	from November 2017 to July 2018	Philippines	Others	Food samples	Escherichia coli	Chloramphenicol	0.194	37	191
Prevalence and Characterization of Quinolone-Resistance Determinants in Escherichia coli Isolated from Food-Producing Animals and Animal-Derived Food in the Philippines	Belotindos, L.; Villanueva, M.; Miguel, J., Jr.; Bwalya, P.; Harada, T.; Kawahara, R.; Nakajima, C.; Mingala, C.; Suzuki, Y.	2021	Belotindos 2021	environmental	from November 2017 to July 2018	Philippines	Others	Environmental samples	Escherichia coli	Ciprofloxacin	0.041	3	73
Prevalence and Characterization of Quinolone-Resistance Determinants in Escherichia coli Isolated from Food-Producing Animals and Animal-Derived Food in the Philippines	Belotindos, L.; Villanueva, M.; Miguel, J., Jr.; Bwalya, P.; Harada, T.; Kawahara, R.; Nakajima, C.; Mingala, C.; Suzuki, Y.	2021	Belotindos 2021	animal	from November 2017 to July 2018	Philippines	Others	Rectal swabs	Escherichia coli	Ciprofloxacin	0.055	3	55
Prevalence and Characterization of Quinolone-Resistance Determinants in Escherichia coli Isolated from Food-Producing Animals and Animal-Derived Food in the Philippines	Belotindos, L.; Villanueva, M.; Miguel, J., Jr.; Bwalya, P.; Harada, T.; Kawahara, R.; Nakajima, C.; Mingala, C.; Suzuki, Y.	2021	Belotindos 2021	animal	from November 2017 to July 2018	Philippines	Others	Cloacal samples	Escherichia coli	Ciprofloxacin	0.404	21	52
Prevalence and Characterization of Quinolone-Resistance Determinants in Escherichia coli Isolated from Food-Producing Animals and Animal-Derived Food in the Philippines	Belotindos, L.; Villanueva, M.; Miguel, J., Jr.; Bwalya, P.; Harada, T.; Kawahara, R.; Nakajima, C.; Mingala, C.; Suzuki, Y.	2021	Belotindos 2021	food	from November 2017 to July 2018	Philippines	Others	Food samples	Escherichia coli	Ciprofloxacin	0.032	6	188
Prevalence and Characterization of Quinolone-Resistance Determinants in Escherichia coli Isolated from Food-Producing Animals and Animal-Derived Food in the Philippines	Belotindos, L.; Villanueva, M.; Miguel, J., Jr.; Bwalya, P.; Harada, T.; Kawahara, R.; Nakajima, C.; Mingala, C.; Suzuki, Y.	2021	Belotindos 2021	food	from November 2017 to July 2018	Philippines	Others	Food samples	Escherichia coli	Ciprofloxacin	0.254	57	224
Prevalence and Characterization of Quinolone-Resistance Determinants in Escherichia coli Isolated from Food-Producing Animals and Animal-Derived Food in the Philippines	Belotindos, L.; Villanueva, M.; Miguel, J., Jr.; Bwalya, P.; Harada, T.; Kawahara, R.; Nakajima, C.; Mingala, C.; Suzuki, Y.	2021	Belotindos 2021	food	from November 2017 to July 2018	Philippines	Others	Food samples	Escherichia coli	Ciprofloxacin	0.01	2	191
Prevalence and Characterization of Quinolone-Resistance Determinants in Escherichia coli Isolated from Food-Producing Animals and Animal-Derived Food in the Philippines	Belotindos, L.; Villanueva, M.; Miguel, J., Jr.; Bwalya, P.; Harada, T.; Kawahara, R.; Nakajima, C.; Mingala, C.; Suzuki, Y.	2021	Belotindos 2021	food	from November 2017 to July 2018	Philippines	Others	Food samples	Escherichia coli	Colistin	0.25	2	8
Prevalence and Characterization of Quinolone-Resistance Determinants in Escherichia coli Isolated from Food-Producing Animals and Animal-Derived Food in the Philippines	Belotindos, L.; Villanueva, M.; Miguel, J., Jr.; Bwalya, P.; Harada, T.; Kawahara, R.; Nakajima, C.; Mingala, C.; Suzuki, Y.	2021	Belotindos 2021	food	from November 2017 to July 2018	Philippines	Others	Food samples	Escherichia coli	Colistin	0.048	9	188
Prevalence and Characterization of Quinolone-Resistance Determinants in Escherichia coli Isolated from Food-Producing Animals and Animal-Derived Food in the Philippines	Belotindos, L.; Villanueva, M.; Miguel, J., Jr.; Bwalya, P.; Harada, T.; Kawahara, R.; Nakajima, C.; Mingala, C.; Suzuki, Y.	2021	Belotindos 2021	food	from November 2017 to July 2018	Philippines	Others	Food samples	Escherichia coli	Colistin	0.17	38	224
Prevalence and Characterization of Quinolone-Resistance Determinants in Escherichia coli Isolated from Food-Producing Animals and Animal-Derived Food in the Philippines	Belotindos, L.; Villanueva, M.; Miguel, J., Jr.; Bwalya, P.; Harada, T.; Kawahara, R.; Nakajima, C.; Mingala, C.; Suzuki, Y.	2021	Belotindos 2021	food	from November 2017 to July 2018	Philippines	Others	Food samples	Escherichia coli	Colistin	0.068	13	191
Prevalence and Characterization of Quinolone-Resistance Determinants in Escherichia coli Isolated from Food-Producing Animals and Animal-Derived Food in the Philippines	Belotindos, L.; Villanueva, M.; Miguel, J., Jr.; Bwalya, P.; Harada, T.; Kawahara, R.; Nakajima, C.; Mingala, C.; Suzuki, Y.	2021	Belotindos 2021	environmental	from November 2017 to July 2018	Philippines	Others	Environmental samples	Escherichia coli	Colistin	0.068	5	73
Prevalence and Characterization of Quinolone-Resistance Determinants in Escherichia coli Isolated from Food-Producing Animals and Animal-Derived Food in the Philippines	Belotindos, L.; Villanueva, M.; Miguel, J., Jr.; Bwalya, P.; Harada, T.; Kawahara, R.; Nakajima, C.; Mingala, C.; Suzuki, Y.	2021	Belotindos 2021	animal	from November 2017 to July 2018	Philippines	Others	Rectal swabs	Escherichia coli	Colistin	0.091	5	55
Prevalence and Characterization of Quinolone-Resistance Determinants in Escherichia coli Isolated from Food-Producing Animals and Animal-Derived Food in the Philippines	Belotindos, L.; Villanueva, M.; Miguel, J., Jr.; Bwalya, P.; Harada, T.; Kawahara, R.; Nakajima, C.; Mingala, C.; Suzuki, Y.	2021	Belotindos 2021	animal	from November 2017 to July 2018	Philippines	Others	Cloacal samples	Escherichia coli	Colistin	0.115	6	52
Prevalence and Characterization of Quinolone-Resistance Determinants in Escherichia coli Isolated from Food-Producing Animals and Animal-Derived Food in the Philippines	Belotindos, L.; Villanueva, M.; Miguel, J., Jr.; Bwalya, P.; Harada, T.; Kawahara, R.; Nakajima, C.; Mingala, C.; Suzuki, Y.	2021	Belotindos 2021	food	from November 2017 to July 2018	Philippines	Others	Food samples	Escherichia coli	ESBLs	0.016	3	188
Prevalence and Characterization of Quinolone-Resistance Determinants in Escherichia coli Isolated from Food-Producing Animals and Animal-Derived Food in the Philippines	Belotindos, L.; Villanueva, M.; Miguel, J., Jr.; Bwalya, P.; Harada, T.; Kawahara, R.; Nakajima, C.; Mingala, C.; Suzuki, Y.	2021	Belotindos 2021	food	from November 2017 to July 2018	Philippines	Others	Food samples	Escherichia coli	ESBLs	0.04	9	224
Prevalence and Characterization of Quinolone-Resistance Determinants in Escherichia coli Isolated from Food-Producing Animals and Animal-Derived Food in the Philippines	Belotindos, L.; Villanueva, M.; Miguel, J., Jr.; Bwalya, P.; Harada, T.; Kawahara, R.; Nakajima, C.; Mingala, C.; Suzuki, Y.	2021	Belotindos 2021	food	from November 2017 to July 2018	Philippines	Others	Food samples	Escherichia coli	ESBLs	0.026	5	191
Prevalence and Characterization of Quinolone-Resistance Determinants in Escherichia coli Isolated from Food-Producing Animals and Animal-Derived Food in the Philippines	Belotindos, L.; Villanueva, M.; Miguel, J., Jr.; Bwalya, P.; Harada, T.; Kawahara, R.; Nakajima, C.; Mingala, C.; Suzuki, Y.	2021	Belotindos 2021	environmental	from November 2017 to July 2018	Philippines	Others	Environmental samples	Escherichia coli	ESBLs	0.041	3	73
Prevalence and Characterization of Quinolone-Resistance Determinants in Escherichia coli Isolated from Food-Producing Animals and Animal-Derived Food in the Philippines	Belotindos, L.; Villanueva, M.; Miguel, J., Jr.; Bwalya, P.; Harada, T.; Kawahara, R.; Nakajima, C.; Mingala, C.; Suzuki, Y.	2021	Belotindos 2021	animal	from November 2017 to July 2018	Philippines	Others	Rectal swabs	Escherichia coli	ESBLs	0.018	1	55
Prevalence and Characterization of Quinolone-Resistance Determinants in Escherichia coli Isolated from Food-Producing Animals and Animal-Derived Food in the Philippines	Belotindos, L.; Villanueva, M.; Miguel, J., Jr.; Bwalya, P.; Harada, T.; Kawahara, R.; Nakajima, C.; Mingala, C.; Suzuki, Y.	2021	Belotindos 2021	animal	from November 2017 to July 2018	Philippines	Others	Cloacal samples	Escherichia coli	ESBLs	0.058	3	52
Prevalence and Characterization of Quinolone-Resistance Determinants in Escherichia coli Isolated from Food-Producing Animals and Animal-Derived Food in the Philippines	Belotindos, L.; Villanueva, M.; Miguel, J., Jr.; Bwalya, P.; Harada, T.; Kawahara, R.; Nakajima, C.; Mingala, C.; Suzuki, Y.	2021	Belotindos 2021	environmental	from November 2017 to July 2018	Philippines	Others	Environmental samples	Escherichia coli	Gentamicin	0.068	5	73
Prevalence and Characterization of Quinolone-Resistance Determinants in Escherichia coli Isolated from Food-Producing Animals and Animal-Derived Food in the Philippines	Belotindos, L.; Villanueva, M.; Miguel, J., Jr.; Bwalya, P.; Harada, T.; Kawahara, R.; Nakajima, C.; Mingala, C.; Suzuki, Y.	2021	Belotindos 2021	animal	from November 2017 to July 2018	Philippines	Others	Rectal swabs	Escherichia coli	Gentamicin	0.036	2	55
Prevalence and Characterization of Quinolone-Resistance Determinants in Escherichia coli Isolated from Food-Producing Animals and Animal-Derived Food in the Philippines	Belotindos, L.; Villanueva, M.; Miguel, J., Jr.; Bwalya, P.; Harada, T.; Kawahara, R.; Nakajima, C.; Mingala, C.; Suzuki, Y.	2021	Belotindos 2021	animal	from November 2017 to July 2018	Philippines	Others	Cloacal samples	Escherichia coli	Gentamicin	0.038	2	52
Prevalence and Characterization of Quinolone-Resistance Determinants in Escherichia coli Isolated from Food-Producing Animals and Animal-Derived Food in the Philippines	Belotindos, L.; Villanueva, M.; Miguel, J., Jr.; Bwalya, P.; Harada, T.; Kawahara, R.; Nakajima, C.; Mingala, C.; Suzuki, Y.	2021	Belotindos 2021	food	from November 2017 to July 2018	Philippines	Others	Food samples	Escherichia coli	Gentamicin	0.059	11	188
Prevalence and Characterization of Quinolone-Resistance Determinants in Escherichia coli Isolated from Food-Producing Animals and Animal-Derived Food in the Philippines	Belotindos, L.; Villanueva, M.; Miguel, J., Jr.; Bwalya, P.; Harada, T.; Kawahara, R.; Nakajima, C.; Mingala, C.; Suzuki, Y.	2021	Belotindos 2021	food	from November 2017 to July 2018	Philippines	Others	Food samples	Escherichia coli	Gentamicin	0.188	42	224
Prevalence and Characterization of Quinolone-Resistance Determinants in Escherichia coli Isolated from Food-Producing Animals and Animal-Derived Food in the Philippines	Belotindos, L.; Villanueva, M.; Miguel, J., Jr.; Bwalya, P.; Harada, T.; Kawahara, R.; Nakajima, C.; Mingala, C.; Suzuki, Y.	2021	Belotindos 2021	food	from November 2017 to July 2018	Philippines	Others	Food samples	Escherichia coli	Gentamicin	0.026	5	191
Prevalence and Characterization of Quinolone-Resistance Determinants in Escherichia coli Isolated from Food-Producing Animals and Animal-Derived Food in the Philippines	Belotindos, L.; Villanueva, M.; Miguel, J., Jr.; Bwalya, P.; Harada, T.; Kawahara, R.; Nakajima, C.; Mingala, C.; Suzuki, Y.	2021	Belotindos 2021	food	from November 2017 to July 2018	Philippines	Others	Food samples	Escherichia coli	Imipenem	0.027	5	188
Prevalence and Characterization of Quinolone-Resistance Determinants in Escherichia coli Isolated from Food-Producing Animals and Animal-Derived Food in the Philippines	Belotindos, L.; Villanueva, M.; Miguel, J., Jr.; Bwalya, P.; Harada, T.; Kawahara, R.; Nakajima, C.; Mingala, C.; Suzuki, Y.	2021	Belotindos 2021	food	from November 2017 to July 2018	Philippines	Others	Food samples	Escherichia coli	Imipenem	0.192	43	224
Prevalence and Characterization of Quinolone-Resistance Determinants in Escherichia coli Isolated from Food-Producing Animals and Animal-Derived Food in the Philippines	Belotindos, L.; Villanueva, M.; Miguel, J., Jr.; Bwalya, P.; Harada, T.; Kawahara, R.; Nakajima, C.; Mingala, C.; Suzuki, Y.	2021	Belotindos 2021	food	from November 2017 to July 2018	Philippines	Others	Food samples	Escherichia coli	Imipenem	0.016	3	191
Prevalence and Characterization of Quinolone-Resistance Determinants in Escherichia coli Isolated from Food-Producing Animals and Animal-Derived Food in the Philippines	Belotindos, L.; Villanueva, M.; Miguel, J., Jr.; Bwalya, P.; Harada, T.; Kawahara, R.; Nakajima, C.; Mingala, C.; Suzuki, Y.	2021	Belotindos 2021	environmental	from November 2017 to July 2018	Philippines	Others	Environmental samples	Escherichia coli	Imipenem	0.027	2	73
Prevalence and Characterization of Quinolone-Resistance Determinants in Escherichia coli Isolated from Food-Producing Animals and Animal-Derived Food in the Philippines	Belotindos, L.; Villanueva, M.; Miguel, J., Jr.; Bwalya, P.; Harada, T.; Kawahara, R.; Nakajima, C.; Mingala, C.; Suzuki, Y.	2021	Belotindos 2021	animal	from November 2017 to July 2018	Philippines	Others	Rectal swabs	Escherichia coli	Imipenem	0.036	2	55
Prevalence and Characterization of Quinolone-Resistance Determinants in Escherichia coli Isolated from Food-Producing Animals and Animal-Derived Food in the Philippines	Belotindos, L.; Villanueva, M.; Miguel, J., Jr.; Bwalya, P.; Harada, T.; Kawahara, R.; Nakajima, C.; Mingala, C.; Suzuki, Y.	2021	Belotindos 2021	animal	from November 2017 to July 2018	Philippines	Others	Cloacal samples	Escherichia coli	Imipenem	0.288	15	52
Prevalence and Characterization of Quinolone-Resistance Determinants in Escherichia coli Isolated from Food-Producing Animals and Animal-Derived Food in the Philippines	Belotindos, L.; Villanueva, M.; Miguel, J., Jr.; Bwalya, P.; Harada, T.; Kawahara, R.; Nakajima, C.; Mingala, C.; Suzuki, Y.	2021	Belotindos 2021	food	from November 2017 to July 2018	Philippines	Others	Food samples	Escherichia coli	Kanamycin	0.037	7	188
Prevalence and Characterization of Quinolone-Resistance Determinants in Escherichia coli Isolated from Food-Producing Animals and Animal-Derived Food in the Philippines	Belotindos, L.; Villanueva, M.; Miguel, J., Jr.; Bwalya, P.; Harada, T.; Kawahara, R.; Nakajima, C.; Mingala, C.; Suzuki, Y.	2021	Belotindos 2021	food	from November 2017 to July 2018	Philippines	Others	Food samples	Escherichia coli	Kanamycin	0.286	64	224
Prevalence and Characterization of Quinolone-Resistance Determinants in Escherichia coli Isolated from Food-Producing Animals and Animal-Derived Food in the Philippines	Belotindos, L.; Villanueva, M.; Miguel, J., Jr.; Bwalya, P.; Harada, T.; Kawahara, R.; Nakajima, C.; Mingala, C.; Suzuki, Y.	2021	Belotindos 2021	food	from November 2017 to July 2018	Philippines	Others	Food samples	Escherichia coli	Kanamycin	0.047	9	191
Prevalence and Characterization of Quinolone-Resistance Determinants in Escherichia coli Isolated from Food-Producing Animals and Animal-Derived Food in the Philippines	Belotindos, L.; Villanueva, M.; Miguel, J., Jr.; Bwalya, P.; Harada, T.; Kawahara, R.; Nakajima, C.; Mingala, C.; Suzuki, Y.	2021	Belotindos 2021	environmental	from November 2017 to July 2018	Philippines	Others	Environmental samples	Escherichia coli	Kanamycin	0.082	6	73
Prevalence and Characterization of Quinolone-Resistance Determinants in Escherichia coli Isolated from Food-Producing Animals and Animal-Derived Food in the Philippines	Belotindos, L.; Villanueva, M.; Miguel, J., Jr.; Bwalya, P.; Harada, T.; Kawahara, R.; Nakajima, C.; Mingala, C.; Suzuki, Y.	2021	Belotindos 2021	animal	from November 2017 to July 2018	Philippines	Others	Rectal swabs	Escherichia coli	Kanamycin	0.273	15	55
Prevalence and Characterization of Quinolone-Resistance Determinants in Escherichia coli Isolated from Food-Producing Animals and Animal-Derived Food in the Philippines	Belotindos, L.; Villanueva, M.; Miguel, J., Jr.; Bwalya, P.; Harada, T.; Kawahara, R.; Nakajima, C.; Mingala, C.; Suzuki, Y.	2021	Belotindos 2021	animal	from November 2017 to July 2018	Philippines	Others	Cloacal samples	Escherichia coli	Kanamycin	0.288	15	52
Prevalence and Characterization of Quinolone-Resistance Determinants in Escherichia coli Isolated from Food-Producing Animals and Animal-Derived Food in the Philippines	Belotindos, L.; Villanueva, M.; Miguel, J., Jr.; Bwalya, P.; Harada, T.; Kawahara, R.; Nakajima, C.; Mingala, C.; Suzuki, Y.	2021	Belotindos 2021	food	from November 2017 to July 2018	Philippines	Others	Food samples	Escherichia coli	Meropenem	0.011	1	188
Prevalence and Characterization of Quinolone-Resistance Determinants in Escherichia coli Isolated from Food-Producing Animals and Animal-Derived Food in the Philippines	Belotindos, L.; Villanueva, M.; Miguel, J., Jr.; Bwalya, P.; Harada, T.; Kawahara, R.; Nakajima, C.; Mingala, C.; Suzuki, Y.	2021	Belotindos 2021	food	from November 2017 to July 2018	Philippines	Others	Food samples	Escherichia coli	Meropenem	0.017	2	117
Prevalence and Characterization of Quinolone-Resistance Determinants in Escherichia coli Isolated from Food-Producing Animals and Animal-Derived Food in the Philippines	Belotindos, L.; Villanueva, M.; Miguel, J., Jr.; Bwalya, P.; Harada, T.; Kawahara, R.; Nakajima, C.; Mingala, C.; Suzuki, Y.	2021	Belotindos 2021	food	from November 2017 to July 2018	Philippines	Others	Food samples	Escherichia coli	Meropenem	0	0	88
Prevalence and Characterization of Quinolone-Resistance Determinants in Escherichia coli Isolated from Food-Producing Animals and Animal-Derived Food in the Philippines	Belotindos, L.; Villanueva, M.; Miguel, J., Jr.; Bwalya, P.; Harada, T.; Kawahara, R.; Nakajima, C.; Mingala, C.; Suzuki, Y.	2021	Belotindos 2021	food	from November 2017 to July 2018	Philippines	Others	Food samples	Escherichia coli	Nalidixic acid	0.122	23	188
Prevalence and Characterization of Quinolone-Resistance Determinants in Escherichia coli Isolated from Food-Producing Animals and Animal-Derived Food in the Philippines	Belotindos, L.; Villanueva, M.; Miguel, J., Jr.; Bwalya, P.; Harada, T.; Kawahara, R.; Nakajima, C.; Mingala, C.; Suzuki, Y.	2021	Belotindos 2021	food	from November 2017 to July 2018	Philippines	Others	Food samples	Escherichia coli	Nalidixic acid	0.451	101	224
Prevalence and Characterization of Quinolone-Resistance Determinants in Escherichia coli Isolated from Food-Producing Animals and Animal-Derived Food in the Philippines	Belotindos, L.; Villanueva, M.; Miguel, J., Jr.; Bwalya, P.; Harada, T.; Kawahara, R.; Nakajima, C.; Mingala, C.; Suzuki, Y.	2021	Belotindos 2021	food	from November 2017 to July 2018	Philippines	Others	Food samples	Escherichia coli	Nalidixic acid	0.058	11	191
Prevalence and Characterization of Quinolone-Resistance Determinants in Escherichia coli Isolated from Food-Producing Animals and Animal-Derived Food in the Philippines	Belotindos, L.; Villanueva, M.; Miguel, J., Jr.; Bwalya, P.; Harada, T.; Kawahara, R.; Nakajima, C.; Mingala, C.; Suzuki, Y.	2021	Belotindos 2021	environmental	from November 2017 to July 2018	Philippines	Others	Environmental samples	Escherichia coli	Nalidixic acid	0.123	9	73
Prevalence and Characterization of Quinolone-Resistance Determinants in Escherichia coli Isolated from Food-Producing Animals and Animal-Derived Food in the Philippines	Belotindos, L.; Villanueva, M.; Miguel, J., Jr.; Bwalya, P.; Harada, T.; Kawahara, R.; Nakajima, C.; Mingala, C.; Suzuki, Y.	2021	Belotindos 2021	animal	from November 2017 to July 2018	Philippines	Others	Rectal swabs	Escherichia coli	Nalidixic acid	0.236	13	55
Prevalence and Characterization of Quinolone-Resistance Determinants in Escherichia coli Isolated from Food-Producing Animals and Animal-Derived Food in the Philippines	Belotindos, L.; Villanueva, M.; Miguel, J., Jr.; Bwalya, P.; Harada, T.; Kawahara, R.; Nakajima, C.; Mingala, C.; Suzuki, Y.	2021	Belotindos 2021	animal	from November 2017 to July 2018	Philippines	Others	Cloacal samples	Escherichia coli	Nalidixic acid	0.827	43	52
Prevalence and Characterization of Quinolone-Resistance Determinants in Escherichia coli Isolated from Food-Producing Animals and Animal-Derived Food in the Philippines	Belotindos, L.; Villanueva, M.; Miguel, J., Jr.; Bwalya, P.; Harada, T.; Kawahara, R.; Nakajima, C.; Mingala, C.; Suzuki, Y.	2021	Belotindos 2021	food	from November 2017 to July 2018	Philippines	Others	Food samples	Escherichia coli	Streptomycin	0.261	49	188
Prevalence and Characterization of Quinolone-Resistance Determinants in Escherichia coli Isolated from Food-Producing Animals and Animal-Derived Food in the Philippines	Belotindos, L.; Villanueva, M.; Miguel, J., Jr.; Bwalya, P.; Harada, T.; Kawahara, R.; Nakajima, C.; Mingala, C.; Suzuki, Y.	2021	Belotindos 2021	food	from November 2017 to July 2018	Philippines	Others	Food samples	Escherichia coli	Streptomycin	0.411	92	224
Prevalence and Characterization of Quinolone-Resistance Determinants in Escherichia coli Isolated from Food-Producing Animals and Animal-Derived Food in the Philippines	Belotindos, L.; Villanueva, M.; Miguel, J., Jr.; Bwalya, P.; Harada, T.; Kawahara, R.; Nakajima, C.; Mingala, C.; Suzuki, Y.	2021	Belotindos 2021	food	from November 2017 to July 2018	Philippines	Others	Food samples	Escherichia coli	Streptomycin	0.168	32	191
Prevalence and Characterization of Quinolone-Resistance Determinants in Escherichia coli Isolated from Food-Producing Animals and Animal-Derived Food in the Philippines	Belotindos, L.; Villanueva, M.; Miguel, J., Jr.; Bwalya, P.; Harada, T.; Kawahara, R.; Nakajima, C.; Mingala, C.; Suzuki, Y.	2021	Belotindos 2021	environmental	from November 2017 to July 2018	Philippines	Others	Environmental samples	Escherichia coli	Streptomycin	0.329	24	73
Prevalence and Characterization of Quinolone-Resistance Determinants in Escherichia coli Isolated from Food-Producing Animals and Animal-Derived Food in the Philippines	Belotindos, L.; Villanueva, M.; Miguel, J., Jr.; Bwalya, P.; Harada, T.; Kawahara, R.; Nakajima, C.; Mingala, C.; Suzuki, Y.	2021	Belotindos 2021	animal	from November 2017 to July 2018	Philippines	Others	Rectal swabs	Escherichia coli	Streptomycin	0.345	19	55
Prevalence and Characterization of Quinolone-Resistance Determinants in Escherichia coli Isolated from Food-Producing Animals and Animal-Derived Food in the Philippines	Belotindos, L.; Villanueva, M.; Miguel, J., Jr.; Bwalya, P.; Harada, T.; Kawahara, R.; Nakajima, C.; Mingala, C.; Suzuki, Y.	2021	Belotindos 2021	animal	from November 2017 to July 2018	Philippines	Others	Cloacal samples	Escherichia coli	Streptomycin	0.404	21	52
Prevalence and Characterization of Quinolone-Resistance Determinants in Escherichia coli Isolated from Food-Producing Animals and Animal-Derived Food in the Philippines	Belotindos, L.; Villanueva, M.; Miguel, J., Jr.; Bwalya, P.; Harada, T.; Kawahara, R.; Nakajima, C.; Mingala, C.; Suzuki, Y.	2021	Belotindos 2021	food	from November 2017 to July 2018	Philippines	Others	Food samples	Escherichia coli	Sulfamethoxazole/trimethoprim	0.25	2	8
Prevalence and Characterization of Quinolone-Resistance Determinants in Escherichia coli Isolated from Food-Producing Animals and Animal-Derived Food in the Philippines	Belotindos, L.; Villanueva, M.; Miguel, J., Jr.; Bwalya, P.; Harada, T.; Kawahara, R.; Nakajima, C.; Mingala, C.; Suzuki, Y.	2021	Belotindos 2021	food	from November 2017 to July 2018	Philippines	Others	Food samples	Escherichia coli	Sulfamethoxazole/trimethoprim	0.463	87	188
Prevalence and Characterization of Quinolone-Resistance Determinants in Escherichia coli Isolated from Food-Producing Animals and Animal-Derived Food in the Philippines	Belotindos, L.; Villanueva, M.; Miguel, J., Jr.; Bwalya, P.; Harada, T.; Kawahara, R.; Nakajima, C.; Mingala, C.; Suzuki, Y.	2021	Belotindos 2021	food	from November 2017 to July 2018	Philippines	Others	Food samples	Escherichia coli	Sulfamethoxazole/trimethoprim	0.464	104	224
Prevalence and Characterization of Quinolone-Resistance Determinants in Escherichia coli Isolated from Food-Producing Animals and Animal-Derived Food in the Philippines	Belotindos, L.; Villanueva, M.; Miguel, J., Jr.; Bwalya, P.; Harada, T.; Kawahara, R.; Nakajima, C.; Mingala, C.; Suzuki, Y.	2021	Belotindos 2021	food	from November 2017 to July 2018	Philippines	Others	Food samples	Escherichia coli	Sulfamethoxazole/trimethoprim	0.168	32	191
Prevalence and Characterization of Quinolone-Resistance Determinants in Escherichia coli Isolated from Food-Producing Animals and Animal-Derived Food in the Philippines	Belotindos, L.; Villanueva, M.; Miguel, J., Jr.; Bwalya, P.; Harada, T.; Kawahara, R.; Nakajima, C.; Mingala, C.; Suzuki, Y.	2021	Belotindos 2021	environmental	from November 2017 to July 2018	Philippines	Others	Environmental samples	Escherichia coli	Sulfamethoxazole/trimethoprim	0.616	45	73
Prevalence and Characterization of Quinolone-Resistance Determinants in Escherichia coli Isolated from Food-Producing Animals and Animal-Derived Food in the Philippines	Belotindos, L.; Villanueva, M.; Miguel, J., Jr.; Bwalya, P.; Harada, T.; Kawahara, R.; Nakajima, C.; Mingala, C.; Suzuki, Y.	2021	Belotindos 2021	animal	from November 2017 to July 2018	Philippines	Others	Rectal swabs	Escherichia coli	Sulfamethoxazole/trimethoprim	0.673	37	55
Prevalence and Characterization of Quinolone-Resistance Determinants in Escherichia coli Isolated from Food-Producing Animals and Animal-Derived Food in the Philippines	Belotindos, L.; Villanueva, M.; Miguel, J., Jr.; Bwalya, P.; Harada, T.; Kawahara, R.; Nakajima, C.; Mingala, C.; Suzuki, Y.	2021	Belotindos 2021	animal	from November 2017 to July 2018	Philippines	Others	Cloacal samples	Escherichia coli	Sulfamethoxazole/trimethoprim	0.75	39	52
Prevalence and Characterization of Quinolone-Resistance Determinants in Escherichia coli Isolated from Food-Producing Animals and Animal-Derived Food in the Philippines	Belotindos, L.; Villanueva, M.; Miguel, J., Jr.; Bwalya, P.; Harada, T.; Kawahara, R.; Nakajima, C.; Mingala, C.; Suzuki, Y.	2021	Belotindos 2021	food	from November 2017 to July 2018	Philippines	Others	Food samples	Escherichia coli	Tetracycline	0.375	3	8
Prevalence and Characterization of Quinolone-Resistance Determinants in Escherichia coli Isolated from Food-Producing Animals and Animal-Derived Food in the Philippines	Belotindos, L.; Villanueva, M.; Miguel, J., Jr.; Bwalya, P.; Harada, T.; Kawahara, R.; Nakajima, C.; Mingala, C.; Suzuki, Y.	2021	Belotindos 2021	food	from November 2017 to July 2018	Philippines	Others	Food samples	Escherichia coli	Tetracycline	0.495	93	188
Prevalence and Characterization of Quinolone-Resistance Determinants in Escherichia coli Isolated from Food-Producing Animals and Animal-Derived Food in the Philippines	Belotindos, L.; Villanueva, M.; Miguel, J., Jr.; Bwalya, P.; Harada, T.; Kawahara, R.; Nakajima, C.; Mingala, C.; Suzuki, Y.	2021	Belotindos 2021	food	from November 2017 to July 2018	Philippines	Others	Food samples	Escherichia coli	Tetracycline	0.661	148	224
Prevalence and Characterization of Quinolone-Resistance Determinants in Escherichia coli Isolated from Food-Producing Animals and Animal-Derived Food in the Philippines	Belotindos, L.; Villanueva, M.; Miguel, J., Jr.; Bwalya, P.; Harada, T.; Kawahara, R.; Nakajima, C.; Mingala, C.; Suzuki, Y.	2021	Belotindos 2021	food	from November 2017 to July 2018	Philippines	Others	Food samples	Escherichia coli	Tetracycline	0.346	66	191
Prevalence and Characterization of Quinolone-Resistance Determinants in Escherichia coli Isolated from Food-Producing Animals and Animal-Derived Food in the Philippines	Belotindos, L.; Villanueva, M.; Miguel, J., Jr.; Bwalya, P.; Harada, T.; Kawahara, R.; Nakajima, C.; Mingala, C.; Suzuki, Y.	2021	Belotindos 2021	environmental	from November 2017 to July 2018	Philippines	Others	Environmental samples	Escherichia coli	Tetracycline	0.712	52	73
Prevalence and Characterization of Quinolone-Resistance Determinants in Escherichia coli Isolated from Food-Producing Animals and Animal-Derived Food in the Philippines	Belotindos, L.; Villanueva, M.; Miguel, J., Jr.; Bwalya, P.; Harada, T.; Kawahara, R.; Nakajima, C.; Mingala, C.; Suzuki, Y.	2021	Belotindos 2021	animal	from November 2017 to July 2018	Philippines	Others	Rectal swabs	Escherichia coli	Tetracycline	0.964	53	55
Prevalence and Characterization of Quinolone-Resistance Determinants in Escherichia coli Isolated from Food-Producing Animals and Animal-Derived Food in the Philippines	Belotindos, L.; Villanueva, M.; Miguel, J., Jr.; Bwalya, P.; Harada, T.; Kawahara, R.; Nakajima, C.; Mingala, C.; Suzuki, Y.	2021	Belotindos 2021	animal	from November 2017 to July 2018	Philippines	Others	Cloacal samples	Escherichia coli	Tetracycline	0.769	40	52
Antimicrobial resistance profiles in bacterial species isolated from fecal samples of free-ranging long-tailed macaques (Macaca fascicularis) living in Lopburi Old Town, Thailand	Boonkusol, D.; Thongyuan, S.; Jangsuwan, N.; Sanyathitiseree, P.	2020	Boonkusol 2020	animal	from October 2018 to July 2019	Thailand	community	Animal samples	Escherichia coli	Amoxicillin	0.94	66	70
Antimicrobial resistance profiles in bacterial species isolated from fecal samples of free-ranging long-tailed macaques (Macaca fascicularis) living in Lopburi Old Town, Thailand	Boonkusol, D.; Thongyuan, S.; Jangsuwan, N.; Sanyathitiseree, P.	2020	Boonkusol 2020	animal	from October 2018 to July 2019	Thailand	community	Animal samples	Citrobacter spp.	Cephalexin	0.83	5	6
Antimicrobial resistance profiles in bacterial species isolated from fecal samples of free-ranging long-tailed macaques (Macaca fascicularis) living in Lopburi Old Town, Thailand	Boonkusol, D.; Thongyuan, S.; Jangsuwan, N.; Sanyathitiseree, P.	2020	Boonkusol 2020	animal	from October 2018 to July 2019	Thailand	community	Animal samples	Escherichia coli	Cephalexin	1	70	70
Antimicrobial resistance profiles in bacterial species isolated from fecal samples of free-ranging long-tailed macaques (Macaca fascicularis) living in Lopburi Old Town, Thailand	Boonkusol, D.; Thongyuan, S.; Jangsuwan, N.; Sanyathitiseree, P.	2020	Boonkusol 2020	animal	from October 2018 to July 2019	Thailand	community	Animal samples	Citrobacter spp.	Clindamycin	1	6	6
Antimicrobial resistance profiles in bacterial species isolated from fecal samples of free-ranging long-tailed macaques (Macaca fascicularis) living in Lopburi Old Town, Thailand	Boonkusol, D.; Thongyuan, S.; Jangsuwan, N.; Sanyathitiseree, P.	2020	Boonkusol 2020	animal	from October 2018 to July 2019	Thailand	community	Animal samples	Escherichia coli	Clindamycin	0.97	68	70
Antimicrobial resistance profiles in bacterial species isolated from fecal samples of free-ranging long-tailed macaques (Macaca fascicularis) living in Lopburi Old Town, Thailand	Boonkusol, D.; Thongyuan, S.; Jangsuwan, N.; Sanyathitiseree, P.	2020	Boonkusol 2020	animal	from October 2018 to July 2019	Thailand	community	Animal samples	Salmonella spp.	Clindamycin	1	18	18
Antimicrobial resistance profiles in bacterial species isolated from fecal samples of free-ranging long-tailed macaques (Macaca fascicularis) living in Lopburi Old Town, Thailand	Boonkusol, D.; Thongyuan, S.; Jangsuwan, N.; Sanyathitiseree, P.	2020	Boonkusol 2020	animal	from October 2018 to July 2019	Thailand	community	Animal samples	Citrobacter spp.	Erythromycin	1	6	6
Antimicrobial resistance profiles in bacterial species isolated from fecal samples of free-ranging long-tailed macaques (Macaca fascicularis) living in Lopburi Old Town, Thailand	Boonkusol, D.; Thongyuan, S.; Jangsuwan, N.; Sanyathitiseree, P.	2020	Boonkusol 2020	animal	from October 2018 to July 2019	Thailand	community	Animal samples	Escherichia coli	Erythromycin	1	70	70
Antimicrobial resistance profiles in bacterial species isolated from fecal samples of free-ranging long-tailed macaques (Macaca fascicularis) living in Lopburi Old Town, Thailand	Boonkusol, D.; Thongyuan, S.; Jangsuwan, N.; Sanyathitiseree, P.	2020	Boonkusol 2020	animal	from October 2018 to July 2019	Thailand	community	Animal samples	Salmonella spp.	Erythromycin	1	18	18
Phenotypic and genotypic characterizations of extended-spectrum beta-lactamase-producing Escherichia coli in Thailand	Bubpamala, J.; Khuntayaporn, P.; Thirapanmethee, K.; Montakantikul, P.; Santanirand, P.; Chomnawang, M. T.	2018	Bubpamala 2018	human	from 2014 to 2015	Thailand	hospital	Clinical samples	Escherichia coli	Ceftazidime	0.8	228	258
Phenotypic and genotypic characterizations of extended-spectrum beta-lactamase-producing Escherichia coli in Thailand	Bubpamala, J.; Khuntayaporn, P.; Thirapanmethee, K.; Montakantikul, P.; Santanirand, P.; Chomnawang, M. T.	2018	Bubpamala 2018	human	from 2014 to 2015	Thailand	hospital	Clinical samples	Escherichia coli	Ciprofloxacin	0.8526	243	258
Phenotypic and genotypic characterizations of extended-spectrum beta-lactamase-producing Escherichia coli in Thailand	Bubpamala, J.; Khuntayaporn, P.; Thirapanmethee, K.; Montakantikul, P.; Santanirand, P.; Chomnawang, M. T.	2018	Bubpamala 2018	human	from 2014 to 2015	Thailand	hospital	Clinical samples	Escherichia coli	Prulifloxacin	0.793	226	258
Clinical Characteristics, Antimicrobial Resistance, Virulence Genes and Multi-Locus Sequence Typing of Non-Typhoidal Salmonella Serovar Typhimurium and Enteritidis Strains Isolated from Patients in Chiang Mai, Thailand	Buddhasiri, S.; Sukjoi, C.; Tantibhadrasapa, A.; Mongkolkarvin, P.; Boonpan, P.; Pattanadecha, T.; Onton, N.; Laisiriroengrai, T.; Coratat, S.; Khantawa, B.; Tepaamorndech, S.; Duangsonk, K.; Thiennimitr, P.	2023	Buddhasiri 2023	human	from October 2016 to September 2022	Thailand	hospital	Clinical samples	Salmonella spp.	Ampicillin	0.823	325	395
Clinical Characteristics, Antimicrobial Resistance, Virulence Genes and Multi-Locus Sequence Typing of Non-Typhoidal Salmonella Serovar Typhimurium and Enteritidis Strains Isolated from Patients in Chiang Mai, Thailand	Buddhasiri, S.; Sukjoi, C.; Tantibhadrasapa, A.; Mongkolkarvin, P.; Boonpan, P.; Pattanadecha, T.; Onton, N.; Laisiriroengrai, T.; Coratat, S.; Khantawa, B.; Tepaamorndech, S.; Duangsonk, K.; Thiennimitr, P.	2023	Buddhasiri 2023	human	from October 2016 to September 2027	Thailand	hospital	Clinical samples	Salmonella spp.	Ampicillin	0.238	94	395
Clinical Characteristics, Antimicrobial Resistance, Virulence Genes and Multi-Locus Sequence Typing of Non-Typhoidal Salmonella Serovar Typhimurium and Enteritidis Strains Isolated from Patients in Chiang Mai, Thailand	Buddhasiri, S.; Sukjoi, C.; Tantibhadrasapa, A.; Mongkolkarvin, P.; Boonpan, P.; Pattanadecha, T.; Onton, N.; Laisiriroengrai, T.; Coratat, S.; Khantawa, B.; Tepaamorndech, S.; Duangsonk, K.; Thiennimitr, P.	2023	Buddhasiri 2023	human	from October 2016 to September 2026	Thailand	hospital	Clinical samples	Salmonella spp.	Ciprofloxacin	0.286	113	395
Clinical Characteristics, Antimicrobial Resistance, Virulence Genes and Multi-Locus Sequence Typing of Non-Typhoidal Salmonella Serovar Typhimurium and Enteritidis Strains Isolated from Patients in Chiang Mai, Thailand	Buddhasiri, S.; Sukjoi, C.; Tantibhadrasapa, A.; Mongkolkarvin, P.; Boonpan, P.; Pattanadecha, T.; Onton, N.; Laisiriroengrai, T.; Coratat, S.; Khantawa, B.; Tepaamorndech, S.; Duangsonk, K.; Thiennimitr, P.	2023	Buddhasiri 2023	human	from October 2016 to September 2024	Thailand	hospital	Clinical samples	Salmonella spp.	doxycycline	0.8	316	395
Clinical Characteristics, Antimicrobial Resistance, Virulence Genes and Multi-Locus Sequence Typing of Non-Typhoidal Salmonella Serovar Typhimurium and Enteritidis Strains Isolated from Patients in Chiang Mai, Thailand	Buddhasiri, S.; Sukjoi, C.; Tantibhadrasapa, A.; Mongkolkarvin, P.; Boonpan, P.; Pattanadecha, T.; Onton, N.; Laisiriroengrai, T.; Coratat, S.; Khantawa, B.; Tepaamorndech, S.; Duangsonk, K.; Thiennimitr, P.	2023	Buddhasiri 2023	human	from October 2016 to September 2025	Thailand	hospital	Clinical samples	Salmonella spp.	Nalidixic acid	0.714	282	395
Clinical Characteristics, Antimicrobial Resistance, Virulence Genes and Multi-Locus Sequence Typing of Non-Typhoidal Salmonella Serovar Typhimurium and Enteritidis Strains Isolated from Patients in Chiang Mai, Thailand	Buddhasiri, S.; Sukjoi, C.; Tantibhadrasapa, A.; Mongkolkarvin, P.; Boonpan, P.; Pattanadecha, T.; Onton, N.; Laisiriroengrai, T.; Coratat, S.; Khantawa, B.; Tepaamorndech, S.; Duangsonk, K.; Thiennimitr, P.	2023	Buddhasiri 2023	human	from October 2016 to September 2021	Thailand	hospital	Clinical samples	Salmonella spp.	streptomycin	0.844	333	395
Clinical Characteristics, Antimicrobial Resistance, Virulence Genes and Multi-Locus Sequence Typing of Non-Typhoidal Salmonella Serovar Typhimurium and Enteritidis Strains Isolated from Patients in Chiang Mai, Thailand	Buddhasiri, S.; Sukjoi, C.; Tantibhadrasapa, A.; Mongkolkarvin, P.; Boonpan, P.; Pattanadecha, T.; Onton, N.; Laisiriroengrai, T.; Coratat, S.; Khantawa, B.; Tepaamorndech, S.; Duangsonk, K.; Thiennimitr, P.	2023	Buddhasiri 2023	human	from October 2016 to September 2023	Thailand	hospital	Clinical samples	Salmonella spp.	Tetracycline	0.8	316	395
The role of point-of-care tests in antibiotic stewardship for urinary tract infections in a resource-limited setting on the Thailand-Myanmar border	Chalmers, L.; Cross, J.; Chu, C. S.; Phyo, A. P.; Trip, M.; Ling, C.; Carrara, V.; Watthanaworawit, W.; Keereecharoen, L.; Hanboonkunupakarn, B.; Nosten, F.; McGready, R.	2015	Chalmers 2015	human	from November 2013 to October 2014	Mixed	community	Clinical samples	Escherichia coli	Amoxicillin/Clavulanic acid	0.075	5	67
The role of point-of-care tests in antibiotic stewardship for urinary tract infections in a resource-limited setting on the Thailand-Myanmar border	Chalmers, L.; Cross, J.; Chu, C. S.; Phyo, A. P.; Trip, M.; Ling, C.; Carrara, V.; Watthanaworawit, W.; Keereecharoen, L.; Hanboonkunupakarn, B.; Nosten, F.; McGready, R.	2015	Chalmers 2015	human	from November 2013 to October 2014	Mixed	community	Clinical samples	Escherichia coli	Ampicillin	0.701	49	67
The role of point-of-care tests in antibiotic stewardship for urinary tract infections in a resource-limited setting on the Thailand-Myanmar border	Chalmers, L.; Cross, J.; Chu, C. S.; Phyo, A. P.; Trip, M.; Ling, C.; Carrara, V.; Watthanaworawit, W.; Keereecharoen, L.; Hanboonkunupakarn, B.; Nosten, F.; McGready, R.	2015	Chalmers 2015	human	from November 2013 to October 2014	Thailand	community	Clinical samples	Escherichia coli	Ceftriaxone	0.209	14	67
The role of point-of-care tests in antibiotic stewardship for urinary tract infections in a resource-limited setting on the Thailand-Myanmar border	Chalmers, L.; Cross, J.; Chu, C. S.; Phyo, A. P.; Trip, M.; Ling, C.; Carrara, V.; Watthanaworawit, W.; Keereecharoen, L.; Hanboonkunupakarn, B.; Nosten, F.; McGready, R.	2015	Chalmers 2015	human	from November 2013 to October 2014	Thailand	community	Clinical samples	Escherichia coli	Ciprofloxacin	0.209	14	67
The role of point-of-care tests in antibiotic stewardship for urinary tract infections in a resource-limited setting on the Thailand-Myanmar border	Chalmers, L.; Cross, J.; Chu, C. S.; Phyo, A. P.; Trip, M.; Ling, C.; Carrara, V.; Watthanaworawit, W.; Keereecharoen, L.; Hanboonkunupakarn, B.; Nosten, F.; McGready, R.	2015	Chalmers 2015	human	from November 2013 to October 2014	Thailand	community	Clinical samples	Escherichia coli	Gentamicin	0.209	14	67
The role of point-of-care tests in antibiotic stewardship for urinary tract infections in a resource-limited setting on the Thailand-Myanmar border	Chalmers, L.; Cross, J.; Chu, C. S.; Phyo, A. P.; Trip, M.; Ling, C.; Carrara, V.; Watthanaworawit, W.; Keereecharoen, L.; Hanboonkunupakarn, B.; Nosten, F.; McGready, R.	2015	Chalmers 2015	human	from November 2013 to October 2014	Thailand	community	Clinical samples	Escherichia coli	Sulfamethoxazole/trimethoprim	0.627	42	67
Clinically healthy household dogs and cats as carriers of multidrug-resistant Salmonella enterica with variable R plasmids	Chantharothaiphaichit, T.; Phongaran, D.; Angkittitrakul, S.; Aunpromma, S.; Chuanchuen, R.	2022	Chantharothaiphaichit 2022	animal	between 2016 and 2019	Thailand	community	Rectal swabs	Salmonella spp.	Ampicillin	0.388	30	77
Clinically healthy household dogs and cats as carriers of multidrug-resistant Salmonella enterica with variable R plasmids	Chantharothaiphaichit, T.; Phongaran, D.; Angkittitrakul, S.; Aunpromma, S.; Chuanchuen, R.	2022	Chantharothaiphaichit 2022	animal	between 2016 and 2019	Thailand	community	Rectal swabs	Salmonella spp.	Cefotaxime	0.006	1	77
Clinically healthy household dogs and cats as carriers of multidrug-resistant Salmonella enterica with variable R plasmids	Chantharothaiphaichit, T.; Phongaran, D.; Angkittitrakul, S.; Aunpromma, S.; Chuanchuen, R.	2022	Chantharothaiphaichit 2022	animal	between 2016 and 2019	Thailand	community	Rectal swabs	Salmonella spp.	Cefpodoxime	0.011	1	77
Clinically healthy household dogs and cats as carriers of multidrug-resistant Salmonella enterica with variable R plasmids	Chantharothaiphaichit, T.; Phongaran, D.; Angkittitrakul, S.; Aunpromma, S.; Chuanchuen, R.	2022	Chantharothaiphaichit 2022	animal	between 2016 and 2019	Thailand	community	Rectal swabs	Salmonella spp.	Ceftazidime	0.011	0.8	77
Clinically healthy household dogs and cats as carriers of multidrug-resistant Salmonella enterica with variable R plasmids	Chantharothaiphaichit, T.; Phongaran, D.; Angkittitrakul, S.; Aunpromma, S.; Chuanchuen, R.	2022	Chantharothaiphaichit 2022	animal	between 2016 and 2019	Thailand	community	Rectal swabs	Salmonella spp.	Ceftriaxone	0.006	1	77
Clinically healthy household dogs and cats as carriers of multidrug-resistant Salmonella enterica with variable R plasmids	Chantharothaiphaichit, T.; Phongaran, D.; Angkittitrakul, S.; Aunpromma, S.; Chuanchuen, R.	2022	Chantharothaiphaichit 2022	animal	between 2016 and 2019	Thailand	community	Rectal swabs	Salmonella spp.	Chloramphenicol	0.079	6	77
Clinically healthy household dogs and cats as carriers of multidrug-resistant Salmonella enterica with variable R plasmids	Chantharothaiphaichit, T.; Phongaran, D.; Angkittitrakul, S.; Aunpromma, S.; Chuanchuen, R.	2022	Chantharothaiphaichit 2022	animal	between 2016 and 2019	Thailand	community	Rectal swabs	Salmonella spp.	Colistin	0.011	0.8	77
Clinically healthy household dogs and cats as carriers of multidrug-resistant Salmonella enterica with variable R plasmids	Chantharothaiphaichit, T.; Phongaran, D.; Angkittitrakul, S.; Aunpromma, S.; Chuanchuen, R.	2022	Chantharothaiphaichit 2022	animal	between 2016 and 2019	Thailand	community	Rectal swabs	Salmonella spp.	Gentamicin	0.028	2	77
Clinically healthy household dogs and cats as carriers of multidrug-resistant Salmonella enterica with variable R plasmids	Chantharothaiphaichit, T.; Phongaran, D.; Angkittitrakul, S.; Aunpromma, S.; Chuanchuen, R.	2022	Chantharothaiphaichit 2022	animal	between 2016 and 2019	Thailand	community	Rectal swabs	Salmonella spp.	Imipenem	0	0	77
Clinically healthy household dogs and cats as carriers of multidrug-resistant Salmonella enterica with variable R plasmids	Chantharothaiphaichit, T.; Phongaran, D.; Angkittitrakul, S.; Aunpromma, S.; Chuanchuen, R.	2022	Chantharothaiphaichit 2022	animal	between 2016 and 2019	Thailand	community	Rectal swabs	Salmonella spp.	Levofloxacin	0	0	77
Clinically healthy household dogs and cats as carriers of multidrug-resistant Salmonella enterica with variable R plasmids	Chantharothaiphaichit, T.; Phongaran, D.; Angkittitrakul, S.; Aunpromma, S.; Chuanchuen, R.	2022	Chantharothaiphaichit 2022	animal	between 2016 and 2019	Thailand	community	Rectal swabs	Salmonella spp.	Meropenem	0	0	77
Clinically healthy household dogs and cats as carriers of multidrug-resistant Salmonella enterica with variable R plasmids	Chantharothaiphaichit, T.; Phongaran, D.; Angkittitrakul, S.; Aunpromma, S.; Chuanchuen, R.	2022	Chantharothaiphaichit 2022	animal	between 2016 and 2019	Thailand	community	Rectal swabs	Salmonella spp.	Multidrug resistance	0.343	26	77
Clinically healthy household dogs and cats as carriers of multidrug-resistant Salmonella enterica with variable R plasmids	Chantharothaiphaichit, T.; Phongaran, D.; Angkittitrakul, S.; Aunpromma, S.; Chuanchuen, R.	2022	Chantharothaiphaichit 2022	animal	between 2016 and 2019	Thailand	community	Rectal swabs	Salmonella spp.	Streptomycin	0.303	23	77
Clinically healthy household dogs and cats as carriers of multidrug-resistant Salmonella enterica with variable R plasmids	Chantharothaiphaichit, T.; Phongaran, D.; Angkittitrakul, S.; Aunpromma, S.; Chuanchuen, R.	2022	Chantharothaiphaichit 2022	animal	between 2016 and 2019	Thailand	community	Rectal swabs	Salmonella spp.	Sulfamethoxazole	0.343	26	77
Clinically healthy household dogs and cats as carriers of multidrug-resistant Salmonella enterica with variable R plasmids	Chantharothaiphaichit, T.; Phongaran, D.; Angkittitrakul, S.; Aunpromma, S.; Chuanchuen, R.	2022	Chantharothaiphaichit 2022	animal	between 2016 and 2019	Thailand	community	Rectal swabs	Salmonella spp.	Tetracycline	0.371	29	77
Clinically healthy household dogs and cats as carriers of multidrug-resistant Salmonella enterica with variable R plasmids	Chantharothaiphaichit, T.; Phongaran, D.; Angkittitrakul, S.; Aunpromma, S.; Chuanchuen, R.	2022	Chantharothaiphaichit 2022	animal	between 2016 and 2019	Thailand	community	Rectal swabs	Salmonella spp.	Trimethoprim	0.202	16	77
The higher prevalence of extended spectrum beta-lactamases among Escherichia coli ST131 in Southeast Asia is driven by expansion of a single, locally prevalent subclone	Chen, S. L.; Ding, Y.; Apisarnthanarak, A.; Kalimuddin, S.; Archuleta, S.; Omar, S. F. S.; De, P. P.; Koh, T. H.; Chew, K. L.; Atiya, N.; Suwantarat, N.; Velayuthan, R. D.; Wong, J. G. X.; Lye, D. C.	2019	Chen 2019	human	Strains were collected in July 2015 in the Singapore hospitals and from August to November 2015 in the hospitals in Thailand and Malaysia	Mixed	hospital	Clinical samples	Escherichia coli	Amikacin	0.0574163	12	209
The higher prevalence of extended spectrum beta-lactamases among Escherichia coli ST131 in Southeast Asia is driven by expansion of a single, locally prevalent subclone	Chen, S. L.; Ding, Y.; Apisarnthanarak, A.; Kalimuddin, S.; Archuleta, S.; Omar, S. F. S.; De, P. P.; Koh, T. H.; Chew, K. L.; Atiya, N.; Suwantarat, N.; Velayuthan, R. D.; Wong, J. G. X.; Lye, D. C.	2019	Chen 2019	human	Strains were collected in July 2015 in the Singapore hospitals and from August to November 2015 in the hospitals in Thailand and Malaysia	Mixed	hospital	Clinical samples	Escherichia coli	Amoxicillin/clavulanic acid	0.287081	60	209
The higher prevalence of extended spectrum beta-lactamases among Escherichia coli ST131 in Southeast Asia is driven by expansion of a single, locally prevalent subclone	Chen, S. L.; Ding, Y.; Apisarnthanarak, A.; Kalimuddin, S.; Archuleta, S.; Omar, S. F. S.; De, P. P.; Koh, T. H.; Chew, K. L.; Atiya, N.; Suwantarat, N.; Velayuthan, R. D.; Wong, J. G. X.; Lye, D. C.	2019	Chen 2019	human	Strains were collected in July 2015 in the Singapore hospitals and from August to November 2015 in the hospitals in Thailand and Malaysia	Mixed	hospital	Clinical samples	Escherichia coli	Ampicillin	0.703349	147	209
The higher prevalence of extended spectrum beta-lactamases among Escherichia coli ST131 in Southeast Asia is driven by expansion of a single, locally prevalent subclone	Chen, S. L.; Ding, Y.; Apisarnthanarak, A.; Kalimuddin, S.; Archuleta, S.; Omar, S. F. S.; De, P. P.; Koh, T. H.; Chew, K. L.; Atiya, N.; Suwantarat, N.; Velayuthan, R. D.; Wong, J. G. X.; Lye, D. C.	2019	Chen 2019	human	Strains were collected in July 2015 in the Singapore hospitals and from August to November 2015 in the hospitals in Thailand and Malaysia	Malaysia	hospital	Clinical samples	Escherichia coli	Cefazolin/Cephalexin	0.440191	92	209
The higher prevalence of extended spectrum beta-lactamases among Escherichia coli ST131 in Southeast Asia is driven by expansion of a single, locally prevalent subclone	Chen, S. L.; Ding, Y.; Apisarnthanarak, A.; Kalimuddin, S.; Archuleta, S.; Omar, S. F. S.; De, P. P.; Koh, T. H.; Chew, K. L.; Atiya, N.; Suwantarat, N.; Velayuthan, R. D.; Wong, J. G. X.; Lye, D. C.	2019	Chen 2019	human	Strains were collected in July 2015 in the Singapore hospitals and from August to November 2015 in the hospitals in Thailand and Malaysia	Malaysia	hospital	Clinical samples	Escherichia coli	Cefepime	0.296651	62	209
The higher prevalence of extended spectrum beta-lactamases among Escherichia coli ST131 in Southeast Asia is driven by expansion of a single, locally prevalent subclone	Chen, S. L.; Ding, Y.; Apisarnthanarak, A.; Kalimuddin, S.; Archuleta, S.; Omar, S. F. S.; De, P. P.; Koh, T. H.; Chew, K. L.; Atiya, N.; Suwantarat, N.; Velayuthan, R. D.; Wong, J. G. X.; Lye, D. C.	2019	Chen 2019	human	Strains were collected in July 2015 in the Singapore hospitals and from August to November 2015 in the hospitals in Thailand and Malaysia	Malaysia	hospital	Clinical samples	Escherichia coli	Ceftazidime	0.287081	60	209
The higher prevalence of extended spectrum beta-lactamases among Escherichia coli ST131 in Southeast Asia is driven by expansion of a single, locally prevalent subclone	Chen, S. L.; Ding, Y.; Apisarnthanarak, A.; Kalimuddin, S.; Archuleta, S.; Omar, S. F. S.; De, P. P.; Koh, T. H.; Chew, K. L.; Atiya, N.; Suwantarat, N.; Velayuthan, R. D.; Wong, J. G. X.; Lye, D. C.	2019	Chen 2019	human	Strains were collected in July 2015 in the Singapore hospitals and from August to November 2015 in the hospitals in Thailand and Malaysia	Malaysia	hospital	Clinical samples	Escherichia coli	Ceftriaxone	0.339713	71	209
The higher prevalence of extended spectrum beta-lactamases among Escherichia coli ST131 in Southeast Asia is driven by expansion of a single, locally prevalent subclone	Chen, S. L.; Ding, Y.; Apisarnthanarak, A.; Kalimuddin, S.; Archuleta, S.; Omar, S. F. S.; De, P. P.; Koh, T. H.; Chew, K. L.; Atiya, N.; Suwantarat, N.; Velayuthan, R. D.; Wong, J. G. X.; Lye, D. C.	2019	Chen 2019	human	Strains were collected in July 2015 in the Singapore hospitals and from August to November 2015 in the hospitals in Thailand and Malaysia	Malaysia	hospital	Clinical samples	Escherichia coli	Ciprofloxacin	0.401914	84	209
The higher prevalence of extended spectrum beta-lactamases among Escherichia coli ST131 in Southeast Asia is driven by expansion of a single, locally prevalent subclone	Chen, S. L.; Ding, Y.; Apisarnthanarak, A.; Kalimuddin, S.; Archuleta, S.; Omar, S. F. S.; De, P. P.; Koh, T. H.; Chew, K. L.; Atiya, N.; Suwantarat, N.; Velayuthan, R. D.; Wong, J. G. X.; Lye, D. C.	2019	Chen 2019	human	Strains were collected in July 2015 in the Singapore hospitals and from August to November 2015 in the hospitals in Thailand and Malaysia	Malaysia	hospital	Clinical samples	Escherichia coli	Ertapenem	0	0	209
The higher prevalence of extended spectrum beta-lactamases among Escherichia coli ST131 in Southeast Asia is driven by expansion of a single, locally prevalent subclone	Chen, S. L.; Ding, Y.; Apisarnthanarak, A.; Kalimuddin, S.; Archuleta, S.; Omar, S. F. S.; De, P. P.; Koh, T. H.; Chew, K. L.; Atiya, N.; Suwantarat, N.; Velayuthan, R. D.; Wong, J. G. X.; Lye, D. C.	2019	Chen 2019	human	Strains were collected in July 2015 in the Singapore hospitals and from August to November 2015 in the hospitals in Thailand and Malaysia	Malaysia	hospital	Clinical samples	Escherichia coli	Gentamicin	0.22488	47	209
The higher prevalence of extended spectrum beta-lactamases among Escherichia coli ST131 in Southeast Asia is driven by expansion of a single, locally prevalent subclone	Chen, S. L.; Ding, Y.; Apisarnthanarak, A.; Kalimuddin, S.; Archuleta, S.; Omar, S. F. S.; De, P. P.; Koh, T. H.; Chew, K. L.; Atiya, N.; Suwantarat, N.; Velayuthan, R. D.; Wong, J. G. X.; Lye, D. C.	2019	Chen 2019	human	Strains were collected in July 2015 in the Singapore hospitals and from August to November 2015 in the hospitals in Thailand and Malaysia	Malaysia	hospital	Clinical samples	Escherichia coli	Imipenem	0.00478469	1	209
The higher prevalence of extended spectrum beta-lactamases among Escherichia coli ST131 in Southeast Asia is driven by expansion of a single, locally prevalent subclone	Chen, S. L.; Ding, Y.; Apisarnthanarak, A.; Kalimuddin, S.; Archuleta, S.; Omar, S. F. S.; De, P. P.; Koh, T. H.; Chew, K. L.; Atiya, N.; Suwantarat, N.; Velayuthan, R. D.; Wong, J. G. X.; Lye, D. C.	2019	Chen 2019	human	Strains were collected in July 2015 in the Singapore hospitals and from August to November 2015 in the hospitals in Thailand and Malaysia	Malaysia	hospital	Clinical samples	Escherichia coli	Meropenem	0.00478469	1	209
The higher prevalence of extended spectrum beta-lactamases among Escherichia coli ST131 in Southeast Asia is driven by expansion of a single, locally prevalent subclone	Chen, S. L.; Ding, Y.; Apisarnthanarak, A.; Kalimuddin, S.; Archuleta, S.; Omar, S. F. S.; De, P. P.; Koh, T. H.; Chew, K. L.; Atiya, N.; Suwantarat, N.; Velayuthan, R. D.; Wong, J. G. X.; Lye, D. C.	2019	Chen 2019	human	Strains were collected in July 2015 in the Singapore hospitals and from August to November 2015 in the hospitals in Thailand and Malaysia	Malaysia	hospital	Clinical samples	Escherichia coli	Multidrug resistance	0.45933	96	209
The higher prevalence of extended spectrum beta-lactamases among Escherichia coli ST131 in Southeast Asia is driven by expansion of a single, locally prevalent subclone	Chen, S. L.; Ding, Y.; Apisarnthanarak, A.; Kalimuddin, S.; Archuleta, S.; Omar, S. F. S.; De, P. P.; Koh, T. H.; Chew, K. L.; Atiya, N.; Suwantarat, N.; Velayuthan, R. D.; Wong, J. G. X.; Lye, D. C.	2019	Chen 2019	human	Strains were collected in July 2015 in the Singapore hospitals and from August to November 2015 in the hospitals in Thailand and Malaysia	Malaysia	hospital	Clinical samples	Escherichia coli	Piperacillin/Tazobactam	0.100478	21	209
The higher prevalence of extended spectrum beta-lactamases among Escherichia coli ST131 in Southeast Asia is driven by expansion of a single, locally prevalent subclone	Chen, S. L.; Ding, Y.; Apisarnthanarak, A.; Kalimuddin, S.; Archuleta, S.; Omar, S. F. S.; De, P. P.; Koh, T. H.; Chew, K. L.; Atiya, N.; Suwantarat, N.; Velayuthan, R. D.; Wong, J. G. X.; Lye, D. C.	2019	Chen 2019	human	Strains were collected in July 2015 in the Singapore hospitals and from August to November 2015 in the hospitals in Thailand and Malaysia	Malaysia	hospital	Clinical samples	Escherichia coli	Sulfamethoxazole/trimethoprim	0.483254	101	209
Genomic Characterization of Klebsiella quasipneumoniae from Clinical Specimens in Singapore	Chew, K. L.; Octavia, S.; Lai, D.; Lin, R. T. P.; Teo, J. W. P.	2021	Chew 2021	human	from February to August 2020	Singapore	hospital	Clinical samples	Klebsiella pneumoniae	Amikacin	0.0221675	27	1218
Genomic Characterization of Klebsiella quasipneumoniae from Clinical Specimens in Singapore	Chew, K. L.; Octavia, S.; Lai, D.; Lin, R. T. P.; Teo, J. W. P.	2021	Chew 2021	human	from February to August 2020	Singapore	hospital	Clinical samples	Klebsiella spp.	Amikacin	0.0212766	1	47
Genomic Characterization of Klebsiella quasipneumoniae from Clinical Specimens in Singapore	Chew, K. L.; Octavia, S.; Lai, D.; Lin, R. T. P.; Teo, J. W. P.	2021	Chew 2021	human	from February to August 2020	Singapore	hospital	Clinical samples	Klebsiella pneumoniae	Amoxicillin/clavulanic acid	0.292282	356	1218
Genomic Characterization of Klebsiella quasipneumoniae from Clinical Specimens in Singapore	Chew, K. L.; Octavia, S.; Lai, D.; Lin, R. T. P.; Teo, J. W. P.	2021	Chew 2021	human	from February to August 2020	Singapore	hospital	Clinical samples	Klebsiella spp.	Amoxicillin/clavulanic acid	0.191489	9	47
Genomic Characterization of Klebsiella quasipneumoniae from Clinical Specimens in Singapore	Chew, K. L.; Octavia, S.; Lai, D.; Lin, R. T. P.; Teo, J. W. P.	2021	Chew 2021	human	from February to August 2020	Singapore	hospital	Clinical samples	Klebsiella pneumoniae	Ceftriaxone	0.303777	370	1218
Genomic Characterization of Klebsiella quasipneumoniae from Clinical Specimens in Singapore	Chew, K. L.; Octavia, S.; Lai, D.; Lin, R. T. P.; Teo, J. W. P.	2021	Chew 2021	human	from February to August 2020	Singapore	hospital	Clinical samples	Klebsiella spp.	Ceftriaxone	0.276596	13	47
Genomic Characterization of Klebsiella quasipneumoniae from Clinical Specimens in Singapore	Chew, K. L.; Octavia, S.; Lai, D.; Lin, R. T. P.; Teo, J. W. P.	2021	Chew 2021	human	from February to August 2020	Singapore	hospital	Clinical samples	Klebsiella pneumoniae	Ciprofloxacin	0.356322	434	1218
Genomic Characterization of Klebsiella quasipneumoniae from Clinical Specimens in Singapore	Chew, K. L.; Octavia, S.; Lai, D.; Lin, R. T. P.; Teo, J. W. P.	2021	Chew 2021	human	from February to August 2020	Singapore	hospital	Clinical samples	Klebsiella spp.	Ciprofloxacin	0.191489	9	47
Genomic Characterization of Klebsiella quasipneumoniae from Clinical Specimens in Singapore	Chew, K. L.; Octavia, S.; Lai, D.; Lin, R. T. P.; Teo, J. W. P.	2021	Chew 2021	human	from February to August 2020	Singapore	hospital	Clinical samples	Klebsiella pneumoniae	Gentamicin	0.125616	153	1218
Genomic Characterization of Klebsiella quasipneumoniae from Clinical Specimens in Singapore	Chew, K. L.; Octavia, S.; Lai, D.; Lin, R. T. P.; Teo, J. W. P.	2021	Chew 2021	human	from February to August 2020	Singapore	hospital	Clinical samples	Klebsiella spp.	Gentamicin	0.0851064	4	47
Genomic Characterization of Klebsiella quasipneumoniae from Clinical Specimens in Singapore	Chew, K. L.; Octavia, S.; Lai, D.; Lin, R. T. P.; Teo, J. W. P.	2021	Chew 2021	human	from February to August 2020	Singapore	hospital	Clinical samples	Klebsiella pneumoniae	Meropenem	0.0197044	24	1218
Genomic Characterization of Klebsiella quasipneumoniae from Clinical Specimens in Singapore	Chew, K. L.; Octavia, S.; Lai, D.; Lin, R. T. P.; Teo, J. W. P.	2021	Chew 2021	human	from February to August 2020	Singapore	hospital	Clinical samples	Klebsiella spp.	Meropenem	0.0212766	1	47
Genomic Characterization of Klebsiella quasipneumoniae from Clinical Specimens in Singapore	Chew, K. L.; Octavia, S.; Lai, D.; Lin, R. T. P.; Teo, J. W. P.	2021	Chew 2021	human	from February to August 2020	Singapore	hospital	Clinical samples	Klebsiella pneumoniae	Piperacillin/Tazobactam	0.244663	298	1218
Genomic Characterization of Klebsiella quasipneumoniae from Clinical Specimens in Singapore	Chew, K. L.; Octavia, S.; Lai, D.; Lin, R. T. P.; Teo, J. W. P.	2021	Chew 2021	human	from February to August 2020	Singapore	hospital	Clinical samples	Klebsiella spp.	Piperacillin/Tazobactam	0.12766	6	47
Genomic Characterization of Klebsiella quasipneumoniae from Clinical Specimens in Singapore	Chew, K. L.; Octavia, S.; Lai, D.; Lin, R. T. P.; Teo, J. W. P.	2021	Chew 2021	human	from February to August 2020	Singapore	hospital	Clinical samples	Klebsiella pneumoniae	Sulfamethoxazole/trimethoprim	0.288177	351	1218
Genomic Characterization of Klebsiella quasipneumoniae from Clinical Specimens in Singapore	Chew, K. L.; Octavia, S.; Lai, D.; Lin, R. T. P.; Teo, J. W. P.	2021	Chew 2021	human	from February to August 2020	Singapore	hospital	Clinical samples	Klebsiella spp.	Sulfamethoxazole/trimethoprim	0.170213	8	47
The Emergence of CTX-M-55 in Extended-Sectrum 尾-Lactamase-Producing Escherichia coli from Vegetables Sold in Local Markets of Northern Thailand	Chotinantakul, K.; Woottisin, S.; Okada, S.	2022	Chotinantakul 2022	food	between January and April 2019	Thailand	market	Food samples	Escherichia coli	ESBLs	0.088	16.016	182
Genotypic and phenotypic situation of antimicrobial drug resistance of Escherichia coli in water and manure between biogas and non-biogas swine farms in central Thailand	Dawangpa, A.; Lertwatcharasarakul, P.; Ramasoota, P.; Boonsoongnern, A.; Ratanavanichrojn, N.; Sanguankiat, A.; Phatthanakunanan, S.; Tulayakul, P.	2021	Dawangpa 2021	environmental	2019	Thailand	livestock farms	Water samples	Escherichia coli	Amoxicillin	0.983	59	60
Genotypic and phenotypic situation of antimicrobial drug resistance of Escherichia coli in water and manure between biogas and non-biogas swine farms in central Thailand	Dawangpa, A.; Lertwatcharasarakul, P.; Ramasoota, P.; Boonsoongnern, A.; Ratanavanichrojn, N.; Sanguankiat, A.; Phatthanakunanan, S.; Tulayakul, P.	2021	Dawangpa 2021	environmental	2019	Thailand	livestock farms	Water samples	Escherichia coli	Amoxicillin	0.815	22	27
Genotypic and phenotypic situation of antimicrobial drug resistance of Escherichia coli in water and manure between biogas and non-biogas swine farms in central Thailand	Dawangpa, A.; Lertwatcharasarakul, P.; Ramasoota, P.; Boonsoongnern, A.; Ratanavanichrojn, N.; Sanguankiat, A.; Phatthanakunanan, S.; Tulayakul, P.	2021	Dawangpa 2021	animal	2019	Thailand	livestock farms	Fecal/Stool Samples	Escherichia coli	Amoxicillin	0.986	71	72
Genotypic and phenotypic situation of antimicrobial drug resistance of Escherichia coli in water and manure between biogas and non-biogas swine farms in central Thailand	Dawangpa, A.; Lertwatcharasarakul, P.; Ramasoota, P.; Boonsoongnern, A.; Ratanavanichrojn, N.; Sanguankiat, A.; Phatthanakunanan, S.; Tulayakul, P.	2021	Dawangpa 2021	animal	2019	Thailand	livestock farms	Fecal/Stool Samples	Escherichia coli	Amoxicillin	1	35	37
Genotypic and phenotypic situation of antimicrobial drug resistance of Escherichia coli in water and manure between biogas and non-biogas swine farms in central Thailand	Dawangpa, A.; Lertwatcharasarakul, P.; Ramasoota, P.; Boonsoongnern, A.; Ratanavanichrojn, N.; Sanguankiat, A.; Phatthanakunanan, S.; Tulayakul, P.	2021	Dawangpa 2021	environmental	2019	Thailand	livestock farms	Water samples	Escherichia coli	Amoxicillin/clavulanic acid	0.517	31	60
Genotypic and phenotypic situation of antimicrobial drug resistance of Escherichia coli in water and manure between biogas and non-biogas swine farms in central Thailand	Dawangpa, A.; Lertwatcharasarakul, P.; Ramasoota, P.; Boonsoongnern, A.; Ratanavanichrojn, N.; Sanguankiat, A.; Phatthanakunanan, S.; Tulayakul, P.	2021	Dawangpa 2021	environmental	2019	Thailand	livestock farms	Water samples	Escherichia coli	Amoxicillin/clavulanic acid	0.259	7	27
Genotypic and phenotypic situation of antimicrobial drug resistance of Escherichia coli in water and manure between biogas and non-biogas swine farms in central Thailand	Dawangpa, A.; Lertwatcharasarakul, P.; Ramasoota, P.; Boonsoongnern, A.; Ratanavanichrojn, N.; Sanguankiat, A.; Phatthanakunanan, S.; Tulayakul, P.	2021	Dawangpa 2021	animal	2019	Thailand	livestock farms	Fecal/Stool Samples	Escherichia coli	Amoxicillin/clavulanic acid	0.528	38	72
Genotypic and phenotypic situation of antimicrobial drug resistance of Escherichia coli in water and manure between biogas and non-biogas swine farms in central Thailand	Dawangpa, A.; Lertwatcharasarakul, P.; Ramasoota, P.; Boonsoongnern, A.; Ratanavanichrojn, N.; Sanguankiat, A.; Phatthanakunanan, S.; Tulayakul, P.	2021	Dawangpa 2021	animal	2019	Thailand	livestock farms	Fecal/Stool Samples	Escherichia coli	Amoxicillin/clavulanic acid	0.486	17	37
Genotypic and phenotypic situation of antimicrobial drug resistance of Escherichia coli in water and manure between biogas and non-biogas swine farms in central Thailand	Dawangpa, A.; Lertwatcharasarakul, P.; Ramasoota, P.; Boonsoongnern, A.; Ratanavanichrojn, N.; Sanguankiat, A.; Phatthanakunanan, S.; Tulayakul, P.	2021	Dawangpa 2021	environmental	2019	Thailand	livestock farms	Water samples	Escherichia coli	Ampicillin	0.983	59	60
Genotypic and phenotypic situation of antimicrobial drug resistance of Escherichia coli in water and manure between biogas and non-biogas swine farms in central Thailand	Dawangpa, A.; Lertwatcharasarakul, P.; Ramasoota, P.; Boonsoongnern, A.; Ratanavanichrojn, N.; Sanguankiat, A.; Phatthanakunanan, S.; Tulayakul, P.	2021	Dawangpa 2021	environmental	2019	Thailand	livestock farms	Water samples	Escherichia coli	Ampicillin	0.815	22	27
Genotypic and phenotypic situation of antimicrobial drug resistance of Escherichia coli in water and manure between biogas and non-biogas swine farms in central Thailand	Dawangpa, A.; Lertwatcharasarakul, P.; Ramasoota, P.; Boonsoongnern, A.; Ratanavanichrojn, N.; Sanguankiat, A.; Phatthanakunanan, S.; Tulayakul, P.	2021	Dawangpa 2021	animal	2019	Thailand	livestock farms	Fecal/Stool Samples	Escherichia coli	Ampicillin	0.986	71	72
Genotypic and phenotypic situation of antimicrobial drug resistance of Escherichia coli in water and manure between biogas and non-biogas swine farms in central Thailand	Dawangpa, A.; Lertwatcharasarakul, P.; Ramasoota, P.; Boonsoongnern, A.; Ratanavanichrojn, N.; Sanguankiat, A.; Phatthanakunanan, S.; Tulayakul, P.	2021	Dawangpa 2021	animal	2019	Thailand	livestock farms	Fecal/Stool Samples	Escherichia coli	Ampicillin	1	35	37
Genotypic and phenotypic situation of antimicrobial drug resistance of Escherichia coli in water and manure between biogas and non-biogas swine farms in central Thailand	Dawangpa, A.; Lertwatcharasarakul, P.; Ramasoota, P.; Boonsoongnern, A.; Ratanavanichrojn, N.; Sanguankiat, A.; Phatthanakunanan, S.; Tulayakul, P.	2021	Dawangpa 2021	environmental	2019	Thailand	livestock farms	Water samples	Escherichia coli	Cefovecin	0.483	29	60
Genotypic and phenotypic situation of antimicrobial drug resistance of Escherichia coli in water and manure between biogas and non-biogas swine farms in central Thailand	Dawangpa, A.; Lertwatcharasarakul, P.; Ramasoota, P.; Boonsoongnern, A.; Ratanavanichrojn, N.; Sanguankiat, A.; Phatthanakunanan, S.; Tulayakul, P.	2021	Dawangpa 2021	environmental	2019	Thailand	livestock farms	Water samples	Escherichia coli	Cefovecin	0.259	7	27
Genotypic and phenotypic situation of antimicrobial drug resistance of Escherichia coli in water and manure between biogas and non-biogas swine farms in central Thailand	Dawangpa, A.; Lertwatcharasarakul, P.; Ramasoota, P.; Boonsoongnern, A.; Ratanavanichrojn, N.; Sanguankiat, A.; Phatthanakunanan, S.; Tulayakul, P.	2021	Dawangpa 2021	animal	2019	Thailand	livestock farms	Fecal/Stool Samples	Escherichia coli	Cefovecin	0.542	39	72
Genotypic and phenotypic situation of antimicrobial drug resistance of Escherichia coli in water and manure between biogas and non-biogas swine farms in central Thailand	Dawangpa, A.; Lertwatcharasarakul, P.; Ramasoota, P.; Boonsoongnern, A.; Ratanavanichrojn, N.; Sanguankiat, A.; Phatthanakunanan, S.; Tulayakul, P.	2021	Dawangpa 2021	animal	2019	Thailand	livestock farms	Fecal/Stool Samples	Escherichia coli	Cefovecin	0.486	17	37
Genotypic and phenotypic situation of antimicrobial drug resistance of Escherichia coli in water and manure between biogas and non-biogas swine farms in central Thailand	Dawangpa, A.; Lertwatcharasarakul, P.; Ramasoota, P.; Boonsoongnern, A.; Ratanavanichrojn, N.; Sanguankiat, A.; Phatthanakunanan, S.; Tulayakul, P.	2021	Dawangpa 2021	environmental	2019	Thailand	livestock farms	Water samples	Escherichia coli	Cefpodoxime	0.45	27	60
Genotypic and phenotypic situation of antimicrobial drug resistance of Escherichia coli in water and manure between biogas and non-biogas swine farms in central Thailand	Dawangpa, A.; Lertwatcharasarakul, P.; Ramasoota, P.; Boonsoongnern, A.; Ratanavanichrojn, N.; Sanguankiat, A.; Phatthanakunanan, S.; Tulayakul, P.	2021	Dawangpa 2021	environmental	2019	Thailand	livestock farms	Water samples	Escherichia coli	Cefpodoxime	0.259	7	27
Genotypic and phenotypic situation of antimicrobial drug resistance of Escherichia coli in water and manure between biogas and non-biogas swine farms in central Thailand	Dawangpa, A.; Lertwatcharasarakul, P.; Ramasoota, P.; Boonsoongnern, A.; Ratanavanichrojn, N.; Sanguankiat, A.; Phatthanakunanan, S.; Tulayakul, P.	2021	Dawangpa 2021	animal	2019	Thailand	livestock farms	Fecal/Stool Samples	Escherichia coli	Cefpodoxime	0.542	39	72
Genotypic and phenotypic situation of antimicrobial drug resistance of Escherichia coli in water and manure between biogas and non-biogas swine farms in central Thailand	Dawangpa, A.; Lertwatcharasarakul, P.; Ramasoota, P.; Boonsoongnern, A.; Ratanavanichrojn, N.; Sanguankiat, A.; Phatthanakunanan, S.; Tulayakul, P.	2021	Dawangpa 2021	animal	2019	Thailand	livestock farms	Fecal/Stool Samples	Escherichia coli	Cefpodoxime	0.486	17	37
Genotypic and phenotypic situation of antimicrobial drug resistance of Escherichia coli in water and manure between biogas and non-biogas swine farms in central Thailand	Dawangpa, A.; Lertwatcharasarakul, P.; Ramasoota, P.; Boonsoongnern, A.; Ratanavanichrojn, N.; Sanguankiat, A.; Phatthanakunanan, S.; Tulayakul, P.	2021	Dawangpa 2021	environmental	2019	Thailand	livestock farms	Water samples	Escherichia coli	Ceftiofur	0.467	28	60
Genotypic and phenotypic situation of antimicrobial drug resistance of Escherichia coli in water and manure between biogas and non-biogas swine farms in central Thailand	Dawangpa, A.; Lertwatcharasarakul, P.; Ramasoota, P.; Boonsoongnern, A.; Ratanavanichrojn, N.; Sanguankiat, A.; Phatthanakunanan, S.; Tulayakul, P.	2021	Dawangpa 2021	environmental	2019	Thailand	livestock farms	Water samples	Escherichia coli	Ceftiofur	0.259	7	27
Genotypic and phenotypic situation of antimicrobial drug resistance of Escherichia coli in water and manure between biogas and non-biogas swine farms in central Thailand	Dawangpa, A.; Lertwatcharasarakul, P.; Ramasoota, P.; Boonsoongnern, A.; Ratanavanichrojn, N.; Sanguankiat, A.; Phatthanakunanan, S.; Tulayakul, P.	2021	Dawangpa 2021	animal	2019	Thailand	livestock farms	Fecal/Stool Samples	Escherichia coli	Ceftiofur	0.528	38	72
Genotypic and phenotypic situation of antimicrobial drug resistance of Escherichia coli in water and manure between biogas and non-biogas swine farms in central Thailand	Dawangpa, A.; Lertwatcharasarakul, P.; Ramasoota, P.; Boonsoongnern, A.; Ratanavanichrojn, N.; Sanguankiat, A.; Phatthanakunanan, S.; Tulayakul, P.	2021	Dawangpa 2021	animal	2019	Thailand	livestock farms	Fecal/Stool Samples	Escherichia coli	Ceftiofur	0.486	17	37
Genotypic and phenotypic situation of antimicrobial drug resistance of Escherichia coli in water and manure between biogas and non-biogas swine farms in central Thailand	Dawangpa, A.; Lertwatcharasarakul, P.; Ramasoota, P.; Boonsoongnern, A.; Ratanavanichrojn, N.; Sanguankiat, A.; Phatthanakunanan, S.; Tulayakul, P.	2021	Dawangpa 2021	environmental	2019	Thailand	livestock farms	Water samples	Escherichia coli	Cephalexin	0.483	29	60
Genotypic and phenotypic situation of antimicrobial drug resistance of Escherichia coli in water and manure between biogas and non-biogas swine farms in central Thailand	Dawangpa, A.; Lertwatcharasarakul, P.; Ramasoota, P.; Boonsoongnern, A.; Ratanavanichrojn, N.; Sanguankiat, A.; Phatthanakunanan, S.; Tulayakul, P.	2021	Dawangpa 2021	environmental	2019	Thailand	livestock farms	Water samples	Escherichia coli	Cephalexin	0.259	7	27
Genotypic and phenotypic situation of antimicrobial drug resistance of Escherichia coli in water and manure between biogas and non-biogas swine farms in central Thailand	Dawangpa, A.; Lertwatcharasarakul, P.; Ramasoota, P.; Boonsoongnern, A.; Ratanavanichrojn, N.; Sanguankiat, A.; Phatthanakunanan, S.; Tulayakul, P.	2021	Dawangpa 2021	animal	2019	Thailand	livestock farms	Fecal/Stool Samples	Escherichia coli	Cephalexin	0.542	39	72
Genotypic and phenotypic situation of antimicrobial drug resistance of Escherichia coli in water and manure between biogas and non-biogas swine farms in central Thailand	Dawangpa, A.; Lertwatcharasarakul, P.; Ramasoota, P.; Boonsoongnern, A.; Ratanavanichrojn, N.; Sanguankiat, A.; Phatthanakunanan, S.; Tulayakul, P.	2021	Dawangpa 2021	animal	2019	Thailand	livestock farms	Fecal/Stool Samples	Escherichia coli	Cephalexin	0.486	17	37
Genotypic and phenotypic situation of antimicrobial drug resistance of Escherichia coli in water and manure between biogas and non-biogas swine farms in central Thailand	Dawangpa, A.; Lertwatcharasarakul, P.; Ramasoota, P.; Boonsoongnern, A.; Ratanavanichrojn, N.; Sanguankiat, A.; Phatthanakunanan, S.; Tulayakul, P.	2021	Dawangpa 2021	environmental	2019	Thailand	livestock farms	Water samples	Escherichia coli	Imipenem	0.45	27	60
Genotypic and phenotypic situation of antimicrobial drug resistance of Escherichia coli in water and manure between biogas and non-biogas swine farms in central Thailand	Dawangpa, A.; Lertwatcharasarakul, P.; Ramasoota, P.; Boonsoongnern, A.; Ratanavanichrojn, N.; Sanguankiat, A.; Phatthanakunanan, S.; Tulayakul, P.	2021	Dawangpa 2021	environmental	2019	Thailand	livestock farms	Water samples	Escherichia coli	Imipenem	0.259	7	27
Genotypic and phenotypic situation of antimicrobial drug resistance of Escherichia coli in water and manure between biogas and non-biogas swine farms in central Thailand	Dawangpa, A.; Lertwatcharasarakul, P.; Ramasoota, P.; Boonsoongnern, A.; Ratanavanichrojn, N.; Sanguankiat, A.; Phatthanakunanan, S.; Tulayakul, P.	2021	Dawangpa 2021	animal	2019	Thailand	livestock farms	Fecal/Stool Samples	Escherichia coli	Imipenem	0.528	38	72
Genotypic and phenotypic situation of antimicrobial drug resistance of Escherichia coli in water and manure between biogas and non-biogas swine farms in central Thailand	Dawangpa, A.; Lertwatcharasarakul, P.; Ramasoota, P.; Boonsoongnern, A.; Ratanavanichrojn, N.; Sanguankiat, A.; Phatthanakunanan, S.; Tulayakul, P.	2021	Dawangpa 2021	animal	2019	Thailand	livestock farms	Fecal/Stool Samples	Escherichia coli	Imipenem	0.486	17	37
Genotypic and phenotypic situation of antimicrobial drug resistance of Escherichia coli in water and manure between biogas and non-biogas swine farms in central Thailand	Dawangpa, A.; Lertwatcharasarakul, P.; Ramasoota, P.; Boonsoongnern, A.; Ratanavanichrojn, N.; Sanguankiat, A.; Phatthanakunanan, S.; Tulayakul, P.	2021	Dawangpa 2021	environmental	2019	Thailand	livestock farms	Water samples	Escherichia coli	Piperacillin	0.717	43	60
Genotypic and phenotypic situation of antimicrobial drug resistance of Escherichia coli in water and manure between biogas and non-biogas swine farms in central Thailand	Dawangpa, A.; Lertwatcharasarakul, P.; Ramasoota, P.; Boonsoongnern, A.; Ratanavanichrojn, N.; Sanguankiat, A.; Phatthanakunanan, S.; Tulayakul, P.	2021	Dawangpa 2021	environmental	2019	Thailand	livestock farms	Water samples	Escherichia coli	Piperacillin	0.556	15	27
Genotypic and phenotypic situation of antimicrobial drug resistance of Escherichia coli in water and manure between biogas and non-biogas swine farms in central Thailand	Dawangpa, A.; Lertwatcharasarakul, P.; Ramasoota, P.; Boonsoongnern, A.; Ratanavanichrojn, N.; Sanguankiat, A.; Phatthanakunanan, S.; Tulayakul, P.	2021	Dawangpa 2021	animal	2019	Thailand	livestock farms	Fecal/Stool Samples	Escherichia coli	Piperacillin	0.889	64	72
Genotypic and phenotypic situation of antimicrobial drug resistance of Escherichia coli in water and manure between biogas and non-biogas swine farms in central Thailand	Dawangpa, A.; Lertwatcharasarakul, P.; Ramasoota, P.; Boonsoongnern, A.; Ratanavanichrojn, N.; Sanguankiat, A.; Phatthanakunanan, S.; Tulayakul, P.	2021	Dawangpa 2021	animal	2019	Thailand	livestock farms	Fecal/Stool Samples	Escherichia coli	Piperacillin	0.486	17	37
Prevalence and factors associated with faecal carriage of extended-spectrum 尾-lactamase-producing Enterobacterales among peripartum women in the community in Cambodia	de Lauzanne, A.; Sreng, N.; Foucaud, E.; Sok, T.; Chon, T.; Yem, C.; Hak, V.; Heng, S.; Soda, M.; Gouali, M.; Nadimpalli, M.; Inghammar, M.; Rabenandrasana, M. A. N.; Collard, J. M.; Vray, M.; Hello, S. L.; Kerleguer, A.; Piola, P.; Delarocque-Astagneau, E.; Guillemot, D.; Huynh, B. T.; Borand, L.	2022	deLauzanne 2022	human	from April 2015 to December 2016	Cambodia	community	Clinical samples	Escherichia coli	ESBLs	0.792	335	423
Multiple Antibiotic Resistance in <i>Escherichia coli</i> Isolates from Fecal and Water Sources in Laguna Lake, Philippines	dela Pe帽a, Lbro; Nacario, M. A. G.; Bolo, N. R.; Rivera, W. L.	2022	delaPe帽a 2022	animal	from July 2017 to July 2019	Philippines	Lakes	Fecal/Stool Samples	Escherichia coli	Ampicilin/sulbactam	0.112676	16	142
Multiple Antibiotic Resistance in <i>Escherichia coli</i> Isolates from Fecal and Water Sources in Laguna Lake, Philippines	dela Pe帽a, Lbro; Nacario, M. A. G.; Bolo, N. R.; Rivera, W. L.	2022	delaPe帽a 2022	animal	from July 2017 to July 2019	Philippines	Lakes	Fecal/Stool Samples	Escherichia coli	Ampicilin/sulbactam	0.0633803	9	142
Multiple Antibiotic Resistance in <i>Escherichia coli</i> Isolates from Fecal and Water Sources in Laguna Lake, Philippines	dela Pe帽a, Lbro; Nacario, M. A. G.; Bolo, N. R.; Rivera, W. L.	2022	delaPe帽a 2022	animal	from July 2017 to July 2019	Philippines	Lakes	Fecal/Stool Samples	Escherichia coli	Ampicilin/sulbactam	0.0774648	11	142
Multiple Antibiotic Resistance in <i>Escherichia coli</i> Isolates from Fecal and Water Sources in Laguna Lake, Philippines	dela Pe帽a, Lbro; Nacario, M. A. G.; Bolo, N. R.; Rivera, W. L.	2022	delaPe帽a 2022	human	from July 2017 to July 2019	Philippines	Lakes	Fecal/Stool Samples	Escherichia coli	Ampicilin/sulbactam	0.0422535	6	142
Multiple Antibiotic Resistance in <i>Escherichia coli</i> Isolates from Fecal and Water Sources in Laguna Lake, Philippines	dela Pe帽a, Lbro; Nacario, M. A. G.; Bolo, N. R.; Rivera, W. L.	2022	delaPe帽a 2022	environmental	from July 2017 to July 2019	Philippines	Lakes	Fecal/Stool Samples	Escherichia coli	Ampicilin/sulbactam	0.0492958	7	142
Multiple Antibiotic Resistance in <i>Escherichia coli</i> Isolates from Fecal and Water Sources in Laguna Lake, Philippines	dela Pe帽a, Lbro; Nacario, M. A. G.; Bolo, N. R.; Rivera, W. L.	2022	delaPe帽a 2022	environmental	from July 2017 to July 2019	Philippines	Lakes	Water samples	Escherichia coli	Ampicillin	0.396	178	450
Multiple Antibiotic Resistance in <i>Escherichia coli</i> Isolates from Fecal and Water Sources in Laguna Lake, Philippines	dela Pe帽a, Lbro; Nacario, M. A. G.; Bolo, N. R.; Rivera, W. L.	2022	delaPe帽a 2022	environmental	from July 2017 to July 2019	Philippines	Lakes	Water samples	Escherichia coli	Ampicillin	0.115	52	450
Multiple Antibiotic Resistance in <i>Escherichia coli</i> Isolates from Fecal and Water Sources in Laguna Lake, Philippines	dela Pe帽a, Lbro; Nacario, M. A. G.; Bolo, N. R.; Rivera, W. L.	2022	delaPe帽a 2022	animal	from July 2017 to July 2019	Philippines	Lakes	Fecal/Stool Samples	Escherichia coli	Ampicillin	0.133803	19	142
Multiple Antibiotic Resistance in <i>Escherichia coli</i> Isolates from Fecal and Water Sources in Laguna Lake, Philippines	dela Pe帽a, Lbro; Nacario, M. A. G.; Bolo, N. R.; Rivera, W. L.	2022	delaPe帽a 2022	animal	from July 2017 to July 2019	Philippines	Lakes	Fecal/Stool Samples	Escherichia coli	Ampicillin	0.0633803	9	142
Multiple Antibiotic Resistance in <i>Escherichia coli</i> Isolates from Fecal and Water Sources in Laguna Lake, Philippines	dela Pe帽a, Lbro; Nacario, M. A. G.; Bolo, N. R.; Rivera, W. L.	2022	delaPe帽a 2022	animal	from July 2017 to July 2019	Philippines	Lakes	Fecal/Stool Samples	Escherichia coli	Ampicillin	0.084507	12	142
Multiple Antibiotic Resistance in <i>Escherichia coli</i> Isolates from Fecal and Water Sources in Laguna Lake, Philippines	dela Pe帽a, Lbro; Nacario, M. A. G.; Bolo, N. R.; Rivera, W. L.	2022	delaPe帽a 2022	human	from July 2017 to July 2019	Philippines	Lakes	Fecal/Stool Samples	Escherichia coli	Ampicillin	0.0704225	10	142
Multiple Antibiotic Resistance in <i>Escherichia coli</i> Isolates from Fecal and Water Sources in Laguna Lake, Philippines	dela Pe帽a, Lbro; Nacario, M. A. G.; Bolo, N. R.; Rivera, W. L.	2022	delaPe帽a 2022	environmental	from July 2017 to July 2019	Philippines	Lakes	Fecal/Stool Samples	Escherichia coli	Ampicillin	0.0633803	9	142
Multiple Antibiotic Resistance in <i>Escherichia coli</i> Isolates from Fecal and Water Sources in Laguna Lake, Philippines	dela Pe帽a, Lbro; Nacario, M. A. G.; Bolo, N. R.; Rivera, W. L.	2022	delaPe帽a 2022	environmental	from July 2017 to July 2019	Philippines	Lakes	Water samples	Escherichia coli	Cefazolin	0.116	52	450
Multiple Antibiotic Resistance in <i>Escherichia coli</i> Isolates from Fecal and Water Sources in Laguna Lake, Philippines	dela Pe帽a, Lbro; Nacario, M. A. G.; Bolo, N. R.; Rivera, W. L.	2022	delaPe帽a 2022	animal	from July 2017 to July 2019	Philippines	Lakes	Fecal/Stool Samples	Escherichia coli	Cefazolin	0	0	142
Multiple Antibiotic Resistance in <i>Escherichia coli</i> Isolates from Fecal and Water Sources in Laguna Lake, Philippines	dela Pe帽a, Lbro; Nacario, M. A. G.; Bolo, N. R.; Rivera, W. L.	2022	delaPe帽a 2022	animal	from July 2017 to July 2019	Philippines	Lakes	Fecal/Stool Samples	Escherichia coli	Cefazolin	0	0	142
Multiple Antibiotic Resistance in <i>Escherichia coli</i> Isolates from Fecal and Water Sources in Laguna Lake, Philippines	dela Pe帽a, Lbro; Nacario, M. A. G.; Bolo, N. R.; Rivera, W. L.	2022	delaPe帽a 2022	animal	from July 2017 to July 2019	Philippines	Lakes	Fecal/Stool Samples	Escherichia coli	Cefazolin	0	0	142
Multiple Antibiotic Resistance in <i>Escherichia coli</i> Isolates from Fecal and Water Sources in Laguna Lake, Philippines	dela Pe帽a, Lbro; Nacario, M. A. G.; Bolo, N. R.; Rivera, W. L.	2022	delaPe帽a 2022	human	from July 2017 to July 2019	Philippines	Lakes	Fecal/Stool Samples	Escherichia coli	Cefazolin	0.0140845	2	142
Multiple Antibiotic Resistance in <i>Escherichia coli</i> Isolates from Fecal and Water Sources in Laguna Lake, Philippines	dela Pe帽a, Lbro; Nacario, M. A. G.; Bolo, N. R.; Rivera, W. L.	2022	delaPe帽a 2022	environmental	from July 2017 to July 2019	Philippines	Lakes	Fecal/Stool Samples	Escherichia coli	Cefazolin	0.00704225	1	142
Multiple Antibiotic Resistance in <i>Escherichia coli</i> Isolates from Fecal and Water Sources in Laguna Lake, Philippines	dela Pe帽a, Lbro; Nacario, M. A. G.; Bolo, N. R.; Rivera, W. L.	2022	delaPe帽a 2022	environmental	from July 2017 to July 2019	Philippines	Lakes	Water samples	Escherichia coli	Ciprofloxacin	0.064	29	450
Multiple Antibiotic Resistance in <i>Escherichia coli</i> Isolates from Fecal and Water Sources in Laguna Lake, Philippines	dela Pe帽a, Lbro; Nacario, M. A. G.; Bolo, N. R.; Rivera, W. L.	2022	delaPe帽a 2022	animal	from July 2017 to July 2019	Philippines	Lakes	Fecal/Stool Samples	Escherichia coli	Ciprofloxacin	0.084507	12	142
Multiple Antibiotic Resistance in <i>Escherichia coli</i> Isolates from Fecal and Water Sources in Laguna Lake, Philippines	dela Pe帽a, Lbro; Nacario, M. A. G.; Bolo, N. R.; Rivera, W. L.	2022	delaPe帽a 2022	animal	from July 2017 to July 2019	Philippines	Lakes	Fecal/Stool Samples	Escherichia coli	Ciprofloxacin	0.0140845	2	142
Multiple Antibiotic Resistance in <i>Escherichia coli</i> Isolates from Fecal and Water Sources in Laguna Lake, Philippines	dela Pe帽a, Lbro; Nacario, M. A. G.; Bolo, N. R.; Rivera, W. L.	2022	delaPe帽a 2022	animal	from July 2017 to July 2019	Philippines	Lakes	Fecal/Stool Samples	Escherichia coli	Ciprofloxacin	0.00704225	1	142
Multiple Antibiotic Resistance in <i>Escherichia coli</i> Isolates from Fecal and Water Sources in Laguna Lake, Philippines	dela Pe帽a, Lbro; Nacario, M. A. G.; Bolo, N. R.; Rivera, W. L.	2022	delaPe帽a 2022	human	from July 2017 to July 2019	Philippines	Lakes	Fecal/Stool Samples	Escherichia coli	Ciprofloxacin	0.0140845	2	142
Multiple Antibiotic Resistance in <i>Escherichia coli</i> Isolates from Fecal and Water Sources in Laguna Lake, Philippines	dela Pe帽a, Lbro; Nacario, M. A. G.; Bolo, N. R.; Rivera, W. L.	2022	delaPe帽a 2022	environmental	from July 2017 to July 2019	Philippines	Lakes	Fecal/Stool Samples	Escherichia coli	Ciprofloxacin	0.0140845	2	142
Multiple Antibiotic Resistance in <i>Escherichia coli</i> Isolates from Fecal and Water Sources in Laguna Lake, Philippines	dela Pe帽a, Lbro; Nacario, M. A. G.; Bolo, N. R.; Rivera, W. L.	2022	delaPe帽a 2022	environmental	from July 2017 to July 2019	Philippines	Lakes	Water samples	Escherichia coli	Gentamicin	0.04	18	450
Multiple Antibiotic Resistance in <i>Escherichia coli</i> Isolates from Fecal and Water Sources in Laguna Lake, Philippines	dela Pe帽a, Lbro; Nacario, M. A. G.; Bolo, N. R.; Rivera, W. L.	2022	delaPe帽a 2022	animal	from July 2017 to July 2019	Philippines	Lakes	Fecal/Stool Samples	Escherichia coli	Gentamicin	0.0211268	3	142
Multiple Antibiotic Resistance in <i>Escherichia coli</i> Isolates from Fecal and Water Sources in Laguna Lake, Philippines	dela Pe帽a, Lbro; Nacario, M. A. G.; Bolo, N. R.; Rivera, W. L.	2022	delaPe帽a 2022	animal	from July 2017 to July 2019	Philippines	Lakes	Fecal/Stool Samples	Escherichia coli	Gentamicin	0.0140845	2	142
Multiple Antibiotic Resistance in <i>Escherichia coli</i> Isolates from Fecal and Water Sources in Laguna Lake, Philippines	dela Pe帽a, Lbro; Nacario, M. A. G.; Bolo, N. R.; Rivera, W. L.	2022	delaPe帽a 2022	animal	from July 2017 to July 2019	Philippines	Lakes	Fecal/Stool Samples	Escherichia coli	Gentamicin	0.0140845	2	142
Multiple Antibiotic Resistance in <i>Escherichia coli</i> Isolates from Fecal and Water Sources in Laguna Lake, Philippines	dela Pe帽a, Lbro; Nacario, M. A. G.; Bolo, N. R.; Rivera, W. L.	2022	delaPe帽a 2022	human	from July 2017 to July 2019	Philippines	Lakes	Fecal/Stool Samples	Escherichia coli	Gentamicin	0.0140845	2	142
Multiple Antibiotic Resistance in <i>Escherichia coli</i> Isolates from Fecal and Water Sources in Laguna Lake, Philippines	dela Pe帽a, Lbro; Nacario, M. A. G.; Bolo, N. R.; Rivera, W. L.	2022	delaPe帽a 2022	environmental	from July 2017 to July 2019	Philippines	Lakes	Fecal/Stool Samples	Escherichia coli	Gentamicin	0.0140845	2	142
Multiple Antibiotic Resistance in <i>Escherichia coli</i> Isolates from Fecal and Water Sources in Laguna Lake, Philippines	dela Pe帽a, Lbro; Nacario, M. A. G.; Bolo, N. R.; Rivera, W. L.	2022	delaPe帽a 2022	environmental	from July 2017 to July 2019	Philippines	Lakes	Water samples	Escherichia coli	Sulbactam	0.115	52	450
Multiple Antibiotic Resistance in <i>Escherichia coli</i> Isolates from Fecal and Water Sources in Laguna Lake, Philippines	dela Pe帽a, Lbro; Nacario, M. A. G.; Bolo, N. R.; Rivera, W. L.	2022	delaPe帽a 2022	environmental	from July 2017 to July 2019	Philippines	Lakes	Water samples	Escherichia coli	Sulfamethoxazole	0.282	127	450
Multiple Antibiotic Resistance in <i>Escherichia coli</i> Isolates from Fecal and Water Sources in Laguna Lake, Philippines	dela Pe帽a, Lbro; Nacario, M. A. G.; Bolo, N. R.; Rivera, W. L.	2022	delaPe帽a 2022	animal	from July 2017 to July 2019	Philippines	Lakes	Fecal/Stool Samples	Escherichia coli	Sulfamethoxazole/trimethoprim	0.133803	19	142
Multiple Antibiotic Resistance in <i>Escherichia coli</i> Isolates from Fecal and Water Sources in Laguna Lake, Philippines	dela Pe帽a, Lbro; Nacario, M. A. G.; Bolo, N. R.; Rivera, W. L.	2022	delaPe帽a 2022	animal	from July 2017 to July 2019	Philippines	Lakes	Fecal/Stool Samples	Escherichia coli	Sulfamethoxazole/trimethoprim	0.0422535	6	142
Multiple Antibiotic Resistance in <i>Escherichia coli</i> Isolates from Fecal and Water Sources in Laguna Lake, Philippines	dela Pe帽a, Lbro; Nacario, M. A. G.; Bolo, N. R.; Rivera, W. L.	2022	delaPe帽a 2022	animal	from July 2017 to July 2019	Philippines	Lakes	Fecal/Stool Samples	Escherichia coli	Sulfamethoxazole/trimethoprim	0.0704225	10	142
Multiple Antibiotic Resistance in <i>Escherichia coli</i> Isolates from Fecal and Water Sources in Laguna Lake, Philippines	dela Pe帽a, Lbro; Nacario, M. A. G.; Bolo, N. R.; Rivera, W. L.	2022	delaPe帽a 2022	human	from July 2017 to July 2019	Philippines	Lakes	Fecal/Stool Samples	Escherichia coli	Sulfamethoxazole/trimethoprim	0.0140845	2	142
Multiple Antibiotic Resistance in <i>Escherichia coli</i> Isolates from Fecal and Water Sources in Laguna Lake, Philippines	dela Pe帽a, Lbro; Nacario, M. A. G.; Bolo, N. R.; Rivera, W. L.	2022	delaPe帽a 2022	environmental	from July 2017 to July 2019	Philippines	Lakes	Fecal/Stool Samples	Escherichia coli	Sulfamethoxazole/trimethoprim	0.056338	8	142
Multiple Antibiotic Resistance in <i>Escherichia coli</i> Isolates from Fecal and Water Sources in Laguna Lake, Philippines	dela Pe帽a, Lbro; Nacario, M. A. G.; Bolo, N. R.; Rivera, W. L.	2022	delaPe帽a 2022	environmental	from July 2017 to July 2019	Philippines	Lakes	Water samples	Escherichia coli	Trimethoprim	0.282	127	450
Prevalence and Antimicrobial Resistance of Escherichia coli, Salmonella and Vibrio Derived from Farm-Raised Red Hybrid Tilapia (Oreochromis spp.) and Asian Sea Bass (Lates calcarifer, Bloch 1970) on the West Coast of Peninsular Malaysia	Dewi, R. R.; Hassan, L.; Daud, H. M.; Matori, M. F.; Nordin, F.; Ahmad, N. I.; Zakaria, Z.	2022	Dewi 2022	animal	from February 2019 to December 2019	Malaysia	Fish farm	Animal samples	Escherichia coli	Ampicillin	0.311475	47.6557	157
Prevalence and Antimicrobial Resistance of Escherichia coli, Salmonella and Vibrio Derived from Farm-Raised Red Hybrid Tilapia (Oreochromis spp.) and Asian Sea Bass (Lates calcarifer, Bloch 1970) on the West Coast of Peninsular Malaysia	Dewi, R. R.; Hassan, L.; Daud, H. M.; Matori, M. F.; Nordin, F.; Ahmad, N. I.; Zakaria, Z.	2022	Dewi 2022	environmental	from February 2019 to December 2019	Malaysia	Fish farm	Water samples	Escherichia coli	Ampicillin	0.577869	26.0041	45
Prevalence and Antimicrobial Resistance of Escherichia coli, Salmonella and Vibrio Derived from Farm-Raised Red Hybrid Tilapia (Oreochromis spp.) and Asian Sea Bass (Lates calcarifer, Bloch 1970) on the West Coast of Peninsular Malaysia	Dewi, R. R.; Hassan, L.; Daud, H. M.; Matori, M. F.; Nordin, F.; Ahmad, N. I.; Zakaria, Z.	2022	Dewi 2022	environmental	from February 2019 to December 2019	Malaysia	Fish farm	Water samples	Salmonella spp.	Ampicillin	0.6	5	9
Prevalence and Antimicrobial Resistance of Escherichia coli, Salmonella and Vibrio Derived from Farm-Raised Red Hybrid Tilapia (Oreochromis spp.) and Asian Sea Bass (Lates calcarifer, Bloch 1970) on the West Coast of Peninsular Malaysia	Dewi, R. R.; Hassan, L.; Daud, H. M.; Matori, M. F.; Nordin, F.; Ahmad, N. I.; Zakaria, Z.	2022	Dewi 2022	animal	from February 2019 to December 2019	Malaysia	Fish farm	Animal samples	Escherichia coli	Cefotaxime	0.00819672	1.2541	157
Prevalence and Antimicrobial Resistance of Escherichia coli, Salmonella and Vibrio Derived from Farm-Raised Red Hybrid Tilapia (Oreochromis spp.) and Asian Sea Bass (Lates calcarifer, Bloch 1970) on the West Coast of Peninsular Malaysia	Dewi, R. R.; Hassan, L.; Daud, H. M.; Matori, M. F.; Nordin, F.; Ahmad, N. I.; Zakaria, Z.	2022	Dewi 2022	environmental	from February 2019 to December 2019	Malaysia	Fish farm	Water samples	Escherichia coli	Cefotaxime	0	0	45
Prevalence and Antimicrobial Resistance of Escherichia coli, Salmonella and Vibrio Derived from Farm-Raised Red Hybrid Tilapia (Oreochromis spp.) and Asian Sea Bass (Lates calcarifer, Bloch 1970) on the West Coast of Peninsular Malaysia	Dewi, R. R.; Hassan, L.; Daud, H. M.; Matori, M. F.; Nordin, F.; Ahmad, N. I.; Zakaria, Z.	2022	Dewi 2022	environmental	from February 2019 to December 2019	Malaysia	Fish farm	Water samples	Escherichia coli	Ceftiofur	0	0	45
Prevalence and Antimicrobial Resistance of Escherichia coli, Salmonella and Vibrio Derived from Farm-Raised Red Hybrid Tilapia (Oreochromis spp.) and Asian Sea Bass (Lates calcarifer, Bloch 1970) on the West Coast of Peninsular Malaysia	Dewi, R. R.; Hassan, L.; Daud, H. M.; Matori, M. F.; Nordin, F.; Ahmad, N. I.; Zakaria, Z.	2022	Dewi 2022	animal	from February 2019 to December 2019	Malaysia	Fish farm	Animal samples	Escherichia coli	Ceftiofur	0	0	157
Prevalence and Antimicrobial Resistance of Escherichia coli, Salmonella and Vibrio Derived from Farm-Raised Red Hybrid Tilapia (Oreochromis spp.) and Asian Sea Bass (Lates calcarifer, Bloch 1970) on the West Coast of Peninsular Malaysia	Dewi, R. R.; Hassan, L.; Daud, H. M.; Matori, M. F.; Nordin, F.; Ahmad, N. I.; Zakaria, Z.	2022	Dewi 2022	animal	from February 2019 to December 2019	Malaysia	Fish farm	Animal samples	Escherichia coli	Chloramphenicol	0.131148	20.0656	157
Prevalence and Antimicrobial Resistance of Escherichia coli, Salmonella and Vibrio Derived from Farm-Raised Red Hybrid Tilapia (Oreochromis spp.) and Asian Sea Bass (Lates calcarifer, Bloch 1970) on the West Coast of Peninsular Malaysia	Dewi, R. R.; Hassan, L.; Daud, H. M.; Matori, M. F.; Nordin, F.; Ahmad, N. I.; Zakaria, Z.	2022	Dewi 2022	environmental	from February 2019 to December 2019	Malaysia	Fish farm	Water samples	Escherichia coli	Chloramphenicol	0.245902	11.0656	45
Prevalence and Antimicrobial Resistance of Escherichia coli, Salmonella and Vibrio Derived from Farm-Raised Red Hybrid Tilapia (Oreochromis spp.) and Asian Sea Bass (Lates calcarifer, Bloch 1970) on the West Coast of Peninsular Malaysia	Dewi, R. R.; Hassan, L.; Daud, H. M.; Matori, M. F.; Nordin, F.; Ahmad, N. I.; Zakaria, Z.	2022	Dewi 2022	environmental	from February 2019 to December 2019	Malaysia	Fish farm	Water samples	Salmonella spp.	Chloramphenicol	0.6	5	9
Prevalence and Antimicrobial Resistance of Escherichia coli, Salmonella and Vibrio Derived from Farm-Raised Red Hybrid Tilapia (Oreochromis spp.) and Asian Sea Bass (Lates calcarifer, Bloch 1970) on the West Coast of Peninsular Malaysia	Dewi, R. R.; Hassan, L.; Daud, H. M.; Matori, M. F.; Nordin, F.; Ahmad, N. I.; Zakaria, Z.	2022	Dewi 2022	animal	from February 2019 to December 2019	Malaysia	Fish farm	Animal samples	Escherichia coli	Ciprofloxacin	0.155738	23.8279	157
Prevalence and Antimicrobial Resistance of Escherichia coli, Salmonella and Vibrio Derived from Farm-Raised Red Hybrid Tilapia (Oreochromis spp.) and Asian Sea Bass (Lates calcarifer, Bloch 1970) on the West Coast of Peninsular Malaysia	Dewi, R. R.; Hassan, L.; Daud, H. M.; Matori, M. F.; Nordin, F.; Ahmad, N. I.; Zakaria, Z.	2022	Dewi 2022	environmental	from February 2019 to December 2019	Malaysia	Fish farm	Water samples	Escherichia coli	Ciprofloxacin	0.221311	9.95902	45
Prevalence and Antimicrobial Resistance of Escherichia coli, Salmonella and Vibrio Derived from Farm-Raised Red Hybrid Tilapia (Oreochromis spp.) and Asian Sea Bass (Lates calcarifer, Bloch 1970) on the West Coast of Peninsular Malaysia	Dewi, R. R.; Hassan, L.; Daud, H. M.; Matori, M. F.; Nordin, F.; Ahmad, N. I.; Zakaria, Z.	2022	Dewi 2022	environmental	from February 2019 to December 2019	Malaysia	Fish farm	Water samples	Escherichia coli	Colistin	0.0737705	3.31967	45
Prevalence and Antimicrobial Resistance of Escherichia coli, Salmonella and Vibrio Derived from Farm-Raised Red Hybrid Tilapia (Oreochromis spp.) and Asian Sea Bass (Lates calcarifer, Bloch 1970) on the West Coast of Peninsular Malaysia	Dewi, R. R.; Hassan, L.; Daud, H. M.; Matori, M. F.; Nordin, F.; Ahmad, N. I.; Zakaria, Z.	2022	Dewi 2022	animal	from February 2019 to December 2019	Malaysia	Fish farm	Animal samples	Escherichia coli	Colistin	0.217213	33.2336	157
Prevalence and Antimicrobial Resistance of Escherichia coli, Salmonella and Vibrio Derived from Farm-Raised Red Hybrid Tilapia (Oreochromis spp.) and Asian Sea Bass (Lates calcarifer, Bloch 1970) on the West Coast of Peninsular Malaysia	Dewi, R. R.; Hassan, L.; Daud, H. M.; Matori, M. F.; Nordin, F.; Ahmad, N. I.; Zakaria, Z.	2022	Dewi 2022	environmental	from February 2019 to December 2019	Malaysia	Fish farm	Water samples	Salmonella spp.	Colistin	0.2	2	9
Prevalence and Antimicrobial Resistance of Escherichia coli, Salmonella and Vibrio Derived from Farm-Raised Red Hybrid Tilapia (Oreochromis spp.) and Asian Sea Bass (Lates calcarifer, Bloch 1970) on the West Coast of Peninsular Malaysia	Dewi, R. R.; Hassan, L.; Daud, H. M.; Matori, M. F.; Nordin, F.; Ahmad, N. I.; Zakaria, Z.	2022	Dewi 2022	environmental	from February 2019 to December 2019	Malaysia	Fish farm	Water samples	Escherichia coli	Erythromycin	0.954918	42.9713	45
Prevalence and Antimicrobial Resistance of Escherichia coli, Salmonella and Vibrio Derived from Farm-Raised Red Hybrid Tilapia (Oreochromis spp.) and Asian Sea Bass (Lates calcarifer, Bloch 1970) on the West Coast of Peninsular Malaysia	Dewi, R. R.; Hassan, L.; Daud, H. M.; Matori, M. F.; Nordin, F.; Ahmad, N. I.; Zakaria, Z.	2022	Dewi 2022	animal	from February 2019 to December 2019	Malaysia	Fish farm	Animal samples	Escherichia coli	Erythromycin	0.987705	151.119	157
Prevalence and Antimicrobial Resistance of Escherichia coli, Salmonella and Vibrio Derived from Farm-Raised Red Hybrid Tilapia (Oreochromis spp.) and Asian Sea Bass (Lates calcarifer, Bloch 1970) on the West Coast of Peninsular Malaysia	Dewi, R. R.; Hassan, L.; Daud, H. M.; Matori, M. F.; Nordin, F.; Ahmad, N. I.; Zakaria, Z.	2022	Dewi 2022	environmental	from February 2019 to December 2019	Malaysia	Fish farm	Water samples	Salmonella spp.	Erythromycin	0.75	7	9
Prevalence and Antimicrobial Resistance of Escherichia coli, Salmonella and Vibrio Derived from Farm-Raised Red Hybrid Tilapia (Oreochromis spp.) and Asian Sea Bass (Lates calcarifer, Bloch 1970) on the West Coast of Peninsular Malaysia	Dewi, R. R.; Hassan, L.; Daud, H. M.; Matori, M. F.; Nordin, F.; Ahmad, N. I.; Zakaria, Z.	2022	Dewi 2022	environmental	from February 2019 to December 2019	Malaysia	Fish farm	Water samples	Escherichia coli	Gentamicin	0.0245902	1.10656	45
Prevalence and Antimicrobial Resistance of Escherichia coli, Salmonella and Vibrio Derived from Farm-Raised Red Hybrid Tilapia (Oreochromis spp.) and Asian Sea Bass (Lates calcarifer, Bloch 1970) on the West Coast of Peninsular Malaysia	Dewi, R. R.; Hassan, L.; Daud, H. M.; Matori, M. F.; Nordin, F.; Ahmad, N. I.; Zakaria, Z.	2022	Dewi 2022	animal	from February 2019 to December 2019	Malaysia	Fish farm	Animal samples	Escherichia coli	Gentamicin	0.0532787	8.15164	157
Prevalence and Antimicrobial Resistance of Escherichia coli, Salmonella and Vibrio Derived from Farm-Raised Red Hybrid Tilapia (Oreochromis spp.) and Asian Sea Bass (Lates calcarifer, Bloch 1970) on the West Coast of Peninsular Malaysia	Dewi, R. R.; Hassan, L.; Daud, H. M.; Matori, M. F.; Nordin, F.; Ahmad, N. I.; Zakaria, Z.	2022	Dewi 2022	environmental	from February 2019 to December 2019	Malaysia	Fish farm	Water samples	Salmonella spp.	Gentamicin	0.1	1	9
Prevalence and Antimicrobial Resistance of Escherichia coli, Salmonella and Vibrio Derived from Farm-Raised Red Hybrid Tilapia (Oreochromis spp.) and Asian Sea Bass (Lates calcarifer, Bloch 1970) on the West Coast of Peninsular Malaysia	Dewi, R. R.; Hassan, L.; Daud, H. M.; Matori, M. F.; Nordin, F.; Ahmad, N. I.; Zakaria, Z.	2022	Dewi 2022	environmental	from February 2019 to December 2019	Malaysia	Fish farm	Water samples	Escherichia coli	Kanamycin	0.22541	10.1434	45
Prevalence and Antimicrobial Resistance of Escherichia coli, Salmonella and Vibrio Derived from Farm-Raised Red Hybrid Tilapia (Oreochromis spp.) and Asian Sea Bass (Lates calcarifer, Bloch 1970) on the West Coast of Peninsular Malaysia	Dewi, R. R.; Hassan, L.; Daud, H. M.; Matori, M. F.; Nordin, F.; Ahmad, N. I.; Zakaria, Z.	2022	Dewi 2022	animal	from February 2019 to December 2019	Malaysia	Fish farm	Animal samples	Escherichia coli	Kanamycin	0.114754	17.5574	157
Prevalence and Antimicrobial Resistance of Escherichia coli, Salmonella and Vibrio Derived from Farm-Raised Red Hybrid Tilapia (Oreochromis spp.) and Asian Sea Bass (Lates calcarifer, Bloch 1970) on the West Coast of Peninsular Malaysia	Dewi, R. R.; Hassan, L.; Daud, H. M.; Matori, M. F.; Nordin, F.; Ahmad, N. I.; Zakaria, Z.	2022	Dewi 2022	environmental	from February 2019 to December 2019	Malaysia	Fish farm	Water samples	Escherichia coli	Nalidixic acid	0.114754	5.16393	45
Prevalence and Antimicrobial Resistance of Escherichia coli, Salmonella and Vibrio Derived from Farm-Raised Red Hybrid Tilapia (Oreochromis spp.) and Asian Sea Bass (Lates calcarifer, Bloch 1970) on the West Coast of Peninsular Malaysia	Dewi, R. R.; Hassan, L.; Daud, H. M.; Matori, M. F.; Nordin, F.; Ahmad, N. I.; Zakaria, Z.	2022	Dewi 2022	animal	from February 2019 to December 2019	Malaysia	Fish farm	Animal samples	Escherichia coli	Nalidixic acid	0.0983607	15.0492	157
Prevalence and Antimicrobial Resistance of Escherichia coli, Salmonella and Vibrio Derived from Farm-Raised Red Hybrid Tilapia (Oreochromis spp.) and Asian Sea Bass (Lates calcarifer, Bloch 1970) on the West Coast of Peninsular Malaysia	Dewi, R. R.; Hassan, L.; Daud, H. M.; Matori, M. F.; Nordin, F.; Ahmad, N. I.; Zakaria, Z.	2022	Dewi 2022	environmental	from February 2019 to December 2019	Malaysia	Fish farm	Water samples	Salmonella spp.	Nalidixic acid	0.4	4	9
Prevalence and Antimicrobial Resistance of Escherichia coli, Salmonella and Vibrio Derived from Farm-Raised Red Hybrid Tilapia (Oreochromis spp.) and Asian Sea Bass (Lates calcarifer, Bloch 1970) on the West Coast of Peninsular Malaysia	Dewi, R. R.; Hassan, L.; Daud, H. M.; Matori, M. F.; Nordin, F.; Ahmad, N. I.; Zakaria, Z.	2022	Dewi 2022	environmental	from February 2019 to December 2019	Malaysia	Fish farm	Water samples	Escherichia coli	Streptomycin	0.311475	14.0164	45
Prevalence and Antimicrobial Resistance of Escherichia coli, Salmonella and Vibrio Derived from Farm-Raised Red Hybrid Tilapia (Oreochromis spp.) and Asian Sea Bass (Lates calcarifer, Bloch 1970) on the West Coast of Peninsular Malaysia	Dewi, R. R.; Hassan, L.; Daud, H. M.; Matori, M. F.; Nordin, F.; Ahmad, N. I.; Zakaria, Z.	2022	Dewi 2022	animal	from February 2019 to December 2019	Malaysia	Fish farm	Animal samples	Escherichia coli	Streptomycin	0.168033	25.709	157
Prevalence and Antimicrobial Resistance of Escherichia coli, Salmonella and Vibrio Derived from Farm-Raised Red Hybrid Tilapia (Oreochromis spp.) and Asian Sea Bass (Lates calcarifer, Bloch 1970) on the West Coast of Peninsular Malaysia	Dewi, R. R.; Hassan, L.; Daud, H. M.; Matori, M. F.; Nordin, F.; Ahmad, N. I.; Zakaria, Z.	2022	Dewi 2022	animal	from February 2019 to December 2019	Malaysia	Fish farm	Animal samples	Escherichia coli	Tetracycline	0.315574	48.2828	157
Prevalence and Antimicrobial Resistance of Escherichia coli, Salmonella and Vibrio Derived from Farm-Raised Red Hybrid Tilapia (Oreochromis spp.) and Asian Sea Bass (Lates calcarifer, Bloch 1970) on the West Coast of Peninsular Malaysia	Dewi, R. R.; Hassan, L.; Daud, H. M.; Matori, M. F.; Nordin, F.; Ahmad, N. I.; Zakaria, Z.	2022	Dewi 2022	environmental	from February 2019 to December 2019	Malaysia	Fish farm	Water samples	Escherichia coli	Tetracycline	0.532787	23.9754	45
Prevalence and Antimicrobial Resistance of Escherichia coli, Salmonella and Vibrio Derived from Farm-Raised Red Hybrid Tilapia (Oreochromis spp.) and Asian Sea Bass (Lates calcarifer, Bloch 1970) on the West Coast of Peninsular Malaysia	Dewi, R. R.; Hassan, L.; Daud, H. M.; Matori, M. F.; Nordin, F.; Ahmad, N. I.; Zakaria, Z.	2022	Dewi 2022	environmental	from February 2019 to December 2019	Malaysia	Fish farm	Water samples	Salmonella spp.	Tetracycline	0.75	7	9
Prevalence and Antimicrobial Resistance of Escherichia coli, Salmonella and Vibrio Derived from Farm-Raised Red Hybrid Tilapia (Oreochromis spp.) and Asian Sea Bass (Lates calcarifer, Bloch 1970) on the West Coast of Peninsular Malaysia	Dewi, R. R.; Hassan, L.; Daud, H. M.; Matori, M. F.; Nordin, F.; Ahmad, N. I.; Zakaria, Z.	2022	Dewi 2022	animal	from February 2019 to December 2019	Malaysia	Fish farm	Animal samples	Escherichia coli	Trimethoprim	0.303279	46.4016	157
Prevalence and Antimicrobial Resistance of Escherichia coli, Salmonella and Vibrio Derived from Farm-Raised Red Hybrid Tilapia (Oreochromis spp.) and Asian Sea Bass (Lates calcarifer, Bloch 1970) on the West Coast of Peninsular Malaysia	Dewi, R. R.; Hassan, L.; Daud, H. M.; Matori, M. F.; Nordin, F.; Ahmad, N. I.; Zakaria, Z.	2022	Dewi 2022	environmental	from February 2019 to December 2019	Malaysia	Fish farm	Water samples	Escherichia coli	Trimethoprim	0.356557	16.0451	45
Prevalence and Antimicrobial Resistance of Escherichia coli, Salmonella and Vibrio Derived from Farm-Raised Red Hybrid Tilapia (Oreochromis spp.) and Asian Sea Bass (Lates calcarifer, Bloch 1970) on the West Coast of Peninsular Malaysia	Dewi, R. R.; Hassan, L.; Daud, H. M.; Matori, M. F.; Nordin, F.; Ahmad, N. I.; Zakaria, Z.	2022	Dewi 2022	environmental	from February 2019 to December 2019	Malaysia	Fish farm	Water samples	Salmonella spp.	Trimethoprim	0.2	2	9
Phylogenetic analysis and antibiotic resistance of Escherichia coli isolated from wild and domestic animals at an agricultural land interface area of Salaphra wildlife sanctuary, Thailand	Duangurai, T.; Rungruengkitkul, A.; Kong-Ngoen, T.; Tunyong, W.; Kosoltanapiwat, N.; Adisakwattana, P.; Vanaporn, M.; Indrawattana, N.; Pumirat, P.	2022	Duangurai 2022	animal	from January to November 2013	Thailand	wild habitat	Animal samples	Escherichia coli	Ampicillin	0.4545	164.529	362
Phylogenetic analysis and antibiotic resistance of Escherichia coli isolated from wild and domestic animals at an agricultural land interface area of Salaphra wildlife sanctuary, Thailand	Duangurai, T.; Rungruengkitkul, A.; Kong-Ngoen, T.; Tunyong, W.; Kosoltanapiwat, N.; Adisakwattana, P.; Vanaporn, M.; Indrawattana, N.; Pumirat, P.	2022	Duangurai 2022	animal	from January to November 2013	Thailand	wild habitat	Animal samples	Escherichia coli	Sulfamethoxazole/trimethoprim	0.0303	8.0003	362
Phylogenetic analysis and antibiotic resistance of Escherichia coli isolated from wild and domestic animals at an agricultural land interface area of Salaphra wildlife sanctuary, Thailand	Duangurai, T.; Rungruengkitkul, A.; Kong-Ngoen, T.; Tunyong, W.; Kosoltanapiwat, N.; Adisakwattana, P.; Vanaporn, M.; Indrawattana, N.; Pumirat, P.	2022	Duangurai 2022	animal	from January to November 2013	Thailand	wild habitat	Animal samples	Escherichia coli	Tetracycline	0.0580207	21.0035	362
Genomic Serotyping, Clinical Manifestations, and Antimicrobial Resistance of Nontyphoidal Salmonella Gastroenteritis in Hospitalized Children in Ho Chi Minh City, Vietnam	Duong, V. T.; The, H. C.; Nhu, T. D. H.; Tuyen, H. T.; Campbell, J. I.; Minh, P. V.; Phuc, H. L.; Chau, T. T. H.; Ngoc, N. M.; Vi, L. L.; Mather, A. E.; Baker, S.	2020	Duong 2020	human	From May 2014 to April 2016.	Vietnam	hospital	Fecal/Stool Samples	Non-typhoidal Salmonella	Ampicillin	0.637778	287	450
Genomic Serotyping, Clinical Manifestations, and Antimicrobial Resistance of Nontyphoidal Salmonella Gastroenteritis in Hospitalized Children in Ho Chi Minh City, Vietnam	Duong, V. T.; The, H. C.; Nhu, T. D. H.; Tuyen, H. T.; Campbell, J. I.; Minh, P. V.; Phuc, H. L.; Chau, T. T. H.; Ngoc, N. M.; Vi, L. L.; Mather, A. E.; Baker, S.	2020	Duong 2020	human	From May 2014 to April 2016.	Vietnam	hospital	Fecal/Stool Samples	Non-typhoidal Salmonella	Azithromycin	0.18	81	450
Genomic Serotyping, Clinical Manifestations, and Antimicrobial Resistance of Nontyphoidal Salmonella Gastroenteritis in Hospitalized Children in Ho Chi Minh City, Vietnam	Duong, V. T.; The, H. C.; Nhu, T. D. H.; Tuyen, H. T.; Campbell, J. I.; Minh, P. V.; Phuc, H. L.; Chau, T. T. H.; Ngoc, N. M.; Vi, L. L.; Mather, A. E.; Baker, S.	2020	Duong 2020	human	From May 2014 to April 2016.	Vietnam	hospital	Fecal/Stool Samples	Non-typhoidal Salmonella	Ceftriaxone/ceftazidime	0.126667	57	450
Genomic Serotyping, Clinical Manifestations, and Antimicrobial Resistance of Nontyphoidal Salmonella Gastroenteritis in Hospitalized Children in Ho Chi Minh City, Vietnam	Duong, V. T.; The, H. C.; Nhu, T. D. H.; Tuyen, H. T.; Campbell, J. I.; Minh, P. V.; Phuc, H. L.; Chau, T. T. H.; Ngoc, N. M.; Vi, L. L.; Mather, A. E.; Baker, S.	2020	Duong 2020	human	From May 2014 to April 2016.	Vietnam	hospital	Fecal/Stool Samples	Non-typhoidal Salmonella	Chloramphenicol	0.533333	240	450
Genomic Serotyping, Clinical Manifestations, and Antimicrobial Resistance of Nontyphoidal Salmonella Gastroenteritis in Hospitalized Children in Ho Chi Minh City, Vietnam	Duong, V. T.; The, H. C.; Nhu, T. D. H.; Tuyen, H. T.; Campbell, J. I.; Minh, P. V.; Phuc, H. L.; Chau, T. T. H.; Ngoc, N. M.; Vi, L. L.; Mather, A. E.; Baker, S.	2020	Duong 2020	human	From May 2014 to April 2016.	Vietnam	hospital	Fecal/Stool Samples	Non-typhoidal Salmonella	Ciprofloxacin	0.0866667	39	450
Genomic Serotyping, Clinical Manifestations, and Antimicrobial Resistance of Nontyphoidal Salmonella Gastroenteritis in Hospitalized Children in Ho Chi Minh City, Vietnam	Duong, V. T.; The, H. C.; Nhu, T. D. H.; Tuyen, H. T.; Campbell, J. I.; Minh, P. V.; Phuc, H. L.; Chau, T. T. H.; Ngoc, N. M.; Vi, L. L.; Mather, A. E.; Baker, S.	2020	Duong 2020	human	From May 2014 to April 2016.	Vietnam	hospital	Fecal/Stool Samples	Non-typhoidal Salmonella	Ciprofloxacin	0.577778	260	450
Genomic Serotyping, Clinical Manifestations, and Antimicrobial Resistance of Nontyphoidal Salmonella Gastroenteritis in Hospitalized Children in Ho Chi Minh City, Vietnam	Duong, V. T.; The, H. C.; Nhu, T. D. H.; Tuyen, H. T.; Campbell, J. I.; Minh, P. V.; Phuc, H. L.; Chau, T. T. H.; Ngoc, N. M.; Vi, L. L.; Mather, A. E.; Baker, S.	2020	Duong 2020	human	From May 2014 to April 2016.	Vietnam	hospital	Fecal/Stool Samples	Non-typhoidal Salmonella	Gentamicin	0.197778	89	450
Genomic Serotyping, Clinical Manifestations, and Antimicrobial Resistance of Nontyphoidal Salmonella Gastroenteritis in Hospitalized Children in Ho Chi Minh City, Vietnam	Duong, V. T.; The, H. C.; Nhu, T. D. H.; Tuyen, H. T.; Campbell, J. I.; Minh, P. V.; Phuc, H. L.; Chau, T. T. H.; Ngoc, N. M.; Vi, L. L.; Mather, A. E.; Baker, S.	2020	Duong 2020	human	From May 2014 to April 2016.	Vietnam	hospital	Fecal/Stool Samples	Non-typhoidal Salmonella	Imipenem	0.0111111	5	450
Genomic Serotyping, Clinical Manifestations, and Antimicrobial Resistance of Nontyphoidal Salmonella Gastroenteritis in Hospitalized Children in Ho Chi Minh City, Vietnam	Duong, V. T.; The, H. C.; Nhu, T. D. H.; Tuyen, H. T.; Campbell, J. I.; Minh, P. V.; Phuc, H. L.; Chau, T. T. H.; Ngoc, N. M.; Vi, L. L.; Mather, A. E.; Baker, S.	2020	Duong 2020	human	From May 2014 to April 2016.	Vietnam	hospital	Fecal/Stool Samples	Non-typhoidal Salmonella	Nalidixic acid	0.413333	186	450
Genomic Serotyping, Clinical Manifestations, and Antimicrobial Resistance of Nontyphoidal Salmonella Gastroenteritis in Hospitalized Children in Ho Chi Minh City, Vietnam	Duong, V. T.; The, H. C.; Nhu, T. D. H.; Tuyen, H. T.; Campbell, J. I.; Minh, P. V.; Phuc, H. L.; Chau, T. T. H.; Ngoc, N. M.; Vi, L. L.; Mather, A. E.; Baker, S.	2020	Duong 2020	human	From May 2014 to April 2016.	Vietnam	hospital	Fecal/Stool Samples	Non-typhoidal Salmonella	Sulfamethoxazole/trimethoprim	0.384444	173	450
No Clinical Benefit of Empirical Antimicrobial Therapy for Pediatric Diarrhea in a High-Usage, High-Resistance Setting	Duong, V. T.; Tuyen, H. T.; Minh, P. V.; Campbell, J. I.; Phuc, H. L.; Nhu, T. D. H.; Tu, L. T. P.; Chau, T. T. H.; Nhi, L. T. Q.; Hung, N. T.; Ngoc, N. M.; Huong, N. T. T.; Vi, L. L.; Thompson, C. N.; Thwaites, G. E.; de Alwis, R.; Baker, S.	2018	Duong 2018	human	From May 2014 to April 2016.	Vietnam	hospital	Fecal/Stool Samples	Non-typhoidal Salmonella	Azithromycin	0.174	83	478
No Clinical Benefit of Empirical Antimicrobial Therapy for Pediatric Diarrhea in a High-Usage, High-Resistance Setting	Duong, V. T.; Tuyen, H. T.; Minh, P. V.; Campbell, J. I.; Phuc, H. L.; Nhu, T. D. H.; Tu, L. T. P.; Chau, T. T. H.; Nhi, L. T. Q.; Hung, N. T.; Ngoc, N. M.; Huong, N. T. T.; Vi, L. L.; Thompson, C. N.; Thwaites, G. E.; de Alwis, R.; Baker, S.	2018	Duong 2018	human	From May 2014 to April 2016.	Vietnam	hospital	Fecal/Stool Samples	Shigella spp.	Azithromycin	0.222	18	81
No Clinical Benefit of Empirical Antimicrobial Therapy for Pediatric Diarrhea in a High-Usage, High-Resistance Setting	Duong, V. T.; Tuyen, H. T.; Minh, P. V.; Campbell, J. I.; Phuc, H. L.; Nhu, T. D. H.; Tu, L. T. P.; Chau, T. T. H.; Nhi, L. T. Q.; Hung, N. T.; Ngoc, N. M.; Huong, N. T. T.; Vi, L. L.; Thompson, C. N.; Thwaites, G. E.; de Alwis, R.; Baker, S.	2018	Duong 2018	human	From May 2014 to April 2016.	Vietnam	hospital	Fecal/Stool Samples	Non-typhoidal Salmonella	Ceftazidime	0.138	66	478
No Clinical Benefit of Empirical Antimicrobial Therapy for Pediatric Diarrhea in a High-Usage, High-Resistance Setting	Duong, V. T.; Tuyen, H. T.; Minh, P. V.; Campbell, J. I.; Phuc, H. L.; Nhu, T. D. H.; Tu, L. T. P.; Chau, T. T. H.; Nhi, L. T. Q.; Hung, N. T.; Ngoc, N. M.; Huong, N. T. T.; Vi, L. L.; Thompson, C. N.; Thwaites, G. E.; de Alwis, R.; Baker, S.	2018	Duong 2018	human	From May 2014 to April 2016.	Vietnam	hospital	Fecal/Stool Samples	Shigella spp.	Ceftazidime	0.568	46	81
No Clinical Benefit of Empirical Antimicrobial Therapy for Pediatric Diarrhea in a High-Usage, High-Resistance Setting	Duong, V. T.; Tuyen, H. T.; Minh, P. V.; Campbell, J. I.; Phuc, H. L.; Nhu, T. D. H.; Tu, L. T. P.; Chau, T. T. H.; Nhi, L. T. Q.; Hung, N. T.; Ngoc, N. M.; Huong, N. T. T.; Vi, L. L.; Thompson, C. N.; Thwaites, G. E.; de Alwis, R.; Baker, S.	2018	Duong 2018	human	From May 2014 to April 2016.	Vietnam	hospital	Fecal/Stool Samples	Shigella spp.	Ceftriaxone	0.568	46	81
No Clinical Benefit of Empirical Antimicrobial Therapy for Pediatric Diarrhea in a High-Usage, High-Resistance Setting	Duong, V. T.; Tuyen, H. T.; Minh, P. V.; Campbell, J. I.; Phuc, H. L.; Nhu, T. D. H.; Tu, L. T. P.; Chau, T. T. H.; Nhi, L. T. Q.; Hung, N. T.; Ngoc, N. M.; Huong, N. T. T.; Vi, L. L.; Thompson, C. N.; Thwaites, G. E.; de Alwis, R.; Baker, S.	2018	Duong 2018	human	From May 2014 to April 2016.	Vietnam	hospital	Fecal/Stool Samples	Non-typhoidal Salmonella	Ciprofloxacin	0.584	279	478
No Clinical Benefit of Empirical Antimicrobial Therapy for Pediatric Diarrhea in a High-Usage, High-Resistance Setting	Duong, V. T.; Tuyen, H. T.; Minh, P. V.; Campbell, J. I.; Phuc, H. L.; Nhu, T. D. H.; Tu, L. T. P.; Chau, T. T. H.; Nhi, L. T. Q.; Hung, N. T.; Ngoc, N. M.; Huong, N. T. T.; Vi, L. L.; Thompson, C. N.; Thwaites, G. E.; de Alwis, R.; Baker, S.	2018	Duong 2018	human	From May 2014 to April 2016.	Vietnam	hospital	Fecal/Stool Samples	Shigella spp.	Ciprofloxacin	0.704	57	81
Phylogenomic investigation of an outbreak of fluoroquinolone-resistant Salmonella enterica subsp. enterica serovar Paratyphi A in Phnom Penh, Cambodia	Dusadeepong, R.; Delvallez, G.; Cheng, S.; Meng, S.; Sreng, N.; Letchford, J.; Choun, K.; Teav, S.; Hardy, L.; Jacobs, J.; Hoang, T.; Seemann, T.; Howden, B. P.; Glaser, P.; Stinear, T. P.; Vandelannoote, K.	2023	Dusadeepong 2023	human	from January 2020 to September 2020	Cambodia	national database	Clinical samples	Salmonella spp.	Ampicillin	0	0	146
Phylogenomic investigation of an outbreak of fluoroquinolone-resistant Salmonella enterica subsp. enterica serovar Paratyphi A in Phnom Penh, Cambodia	Dusadeepong, R.; Delvallez, G.; Cheng, S.; Meng, S.; Sreng, N.; Letchford, J.; Choun, K.; Teav, S.; Hardy, L.; Jacobs, J.; Hoang, T.; Seemann, T.; Howden, B. P.; Glaser, P.; Stinear, T. P.; Vandelannoote, K.	2023	Dusadeepong 2023	human	from January 2020 to September 2020	Cambodia	national database	Clinical samples	Salmonella spp.	Azithromycin	0.007	1.022	146
Phylogenomic investigation of an outbreak of fluoroquinolone-resistant Salmonella enterica subsp. enterica serovar Paratyphi A in Phnom Penh, Cambodia	Dusadeepong, R.; Delvallez, G.; Cheng, S.; Meng, S.; Sreng, N.; Letchford, J.; Choun, K.; Teav, S.; Hardy, L.; Jacobs, J.; Hoang, T.; Seemann, T.; Howden, B. P.; Glaser, P.; Stinear, T. P.; Vandelannoote, K.	2023	Dusadeepong 2023	human	from January 2020 to September 2020	Cambodia	national database	Clinical samples	Salmonella spp.	Cefepime	0	0	146
Phylogenomic investigation of an outbreak of fluoroquinolone-resistant Salmonella enterica subsp. enterica serovar Paratyphi A in Phnom Penh, Cambodia	Dusadeepong, R.; Delvallez, G.; Cheng, S.; Meng, S.; Sreng, N.; Letchford, J.; Choun, K.; Teav, S.; Hardy, L.; Jacobs, J.; Hoang, T.; Seemann, T.; Howden, B. P.; Glaser, P.; Stinear, T. P.; Vandelannoote, K.	2023	Dusadeepong 2023	human	from January 2020 to September 2020	Cambodia	national database	Clinical samples	Salmonella spp.	Cefixime	0	0	146
Phylogenomic investigation of an outbreak of fluoroquinolone-resistant Salmonella enterica subsp. enterica serovar Paratyphi A in Phnom Penh, Cambodia	Dusadeepong, R.; Delvallez, G.; Cheng, S.; Meng, S.; Sreng, N.; Letchford, J.; Choun, K.; Teav, S.; Hardy, L.; Jacobs, J.; Hoang, T.; Seemann, T.; Howden, B. P.; Glaser, P.; Stinear, T. P.; Vandelannoote, K.	2023	Dusadeepong 2023	human	from January 2020 to September 2020	Cambodia	national database	Clinical samples	Salmonella spp.	Cefotaxime	0	0	146
Phylogenomic investigation of an outbreak of fluoroquinolone-resistant Salmonella enterica subsp. enterica serovar Paratyphi A in Phnom Penh, Cambodia	Dusadeepong, R.; Delvallez, G.; Cheng, S.; Meng, S.; Sreng, N.; Letchford, J.; Choun, K.; Teav, S.; Hardy, L.; Jacobs, J.; Hoang, T.; Seemann, T.; Howden, B. P.; Glaser, P.; Stinear, T. P.; Vandelannoote, K.	2023	Dusadeepong 2023	human	from January 2020 to September 2020	Cambodia	national database	Clinical samples	Salmonella spp.	Ceftazidime	0	0	146
Phylogenomic investigation of an outbreak of fluoroquinolone-resistant Salmonella enterica subsp. enterica serovar Paratyphi A in Phnom Penh, Cambodia	Dusadeepong, R.; Delvallez, G.; Cheng, S.; Meng, S.; Sreng, N.; Letchford, J.; Choun, K.; Teav, S.; Hardy, L.; Jacobs, J.; Hoang, T.; Seemann, T.; Howden, B. P.; Glaser, P.; Stinear, T. P.; Vandelannoote, K.	2023	Dusadeepong 2023	human	from January 2020 to September 2020	Cambodia	national database	Clinical samples	Salmonella spp.	Ceftriaxone	0	0	146
Phylogenomic investigation of an outbreak of fluoroquinolone-resistant Salmonella enterica subsp. enterica serovar Paratyphi A in Phnom Penh, Cambodia	Dusadeepong, R.; Delvallez, G.; Cheng, S.; Meng, S.; Sreng, N.; Letchford, J.; Choun, K.; Teav, S.; Hardy, L.; Jacobs, J.; Hoang, T.; Seemann, T.; Howden, B. P.; Glaser, P.; Stinear, T. P.; Vandelannoote, K.	2023	Dusadeepong 2023	human	from January 2020 to September 2020	Cambodia	national database	Clinical samples	Salmonella spp.	Chloramphenicol	0.089	12.994	146
Phylogenomic investigation of an outbreak of fluoroquinolone-resistant Salmonella enterica subsp. enterica serovar Paratyphi A in Phnom Penh, Cambodia	Dusadeepong, R.; Delvallez, G.; Cheng, S.; Meng, S.; Sreng, N.; Letchford, J.; Choun, K.; Teav, S.; Hardy, L.; Jacobs, J.; Hoang, T.; Seemann, T.; Howden, B. P.; Glaser, P.; Stinear, T. P.; Vandelannoote, K.	2023	Dusadeepong 2023	human	from January 2020 to September 2020	Cambodia	national database	Clinical samples	Salmonella spp.	Ciprofloxacin	1	146	146
Phylogenomic investigation of an outbreak of fluoroquinolone-resistant Salmonella enterica subsp. enterica serovar Paratyphi A in Phnom Penh, Cambodia	Dusadeepong, R.; Delvallez, G.; Cheng, S.; Meng, S.; Sreng, N.; Letchford, J.; Choun, K.; Teav, S.; Hardy, L.; Jacobs, J.; Hoang, T.; Seemann, T.; Howden, B. P.; Glaser, P.; Stinear, T. P.; Vandelannoote, K.	2023	Dusadeepong 2023	human	from January 2020 to September 2020	Cambodia	national database	Clinical samples	Salmonella spp.	Gentamicin	0	0	146
Phylogenomic investigation of an outbreak of fluoroquinolone-resistant Salmonella enterica subsp. enterica serovar Paratyphi A in Phnom Penh, Cambodia	Dusadeepong, R.; Delvallez, G.; Cheng, S.; Meng, S.; Sreng, N.; Letchford, J.; Choun, K.; Teav, S.; Hardy, L.; Jacobs, J.; Hoang, T.; Seemann, T.; Howden, B. P.; Glaser, P.; Stinear, T. P.; Vandelannoote, K.	2023	Dusadeepong 2023	human	from January 2020 to September 2020	Cambodia	national database	Clinical samples	Salmonella spp.	Meropenem	0	0	146
Phylogenomic investigation of an outbreak of fluoroquinolone-resistant Salmonella enterica subsp. enterica serovar Paratyphi A in Phnom Penh, Cambodia	Dusadeepong, R.; Delvallez, G.; Cheng, S.; Meng, S.; Sreng, N.; Letchford, J.; Choun, K.; Teav, S.; Hardy, L.; Jacobs, J.; Hoang, T.; Seemann, T.; Howden, B. P.; Glaser, P.; Stinear, T. P.; Vandelannoote, K.	2023	Dusadeepong 2023	human	from January 2020 to September 2020	Cambodia	national database	Clinical samples	Salmonella spp.	Pefloxacin	1	146	146
Identification of Risk Factors Associated with Resistant Escherichia coli Isolates from Poultry Farms in the East Coast of Peninsular Malaysia: A Cross Sectional Study	Elmi, S. A.; Simons, D.; Elton, L.; Haider, N.; Abdel Hamid, M. M.; Shuaib, Y. A.; Khan, M. A.; Othman, I.; Kock, R.; Osman, A. Y.	2021	Elmi 2021	animal	8 February 2019 to 23 February 2020.	Malaysia	poultry farms	Sewage/Wastewater/Sludge samples	Escherichia coli	Tetracycline	0.6	155.4	259
Identification of Risk Factors Associated with Resistant Escherichia coli Isolates from Poultry Farms in the East Coast of Peninsular Malaysia: A Cross Sectional Study	Elmi, S. A.; Simons, D.; Elton, L.; Haider, N.; Abdel Hamid, M. M.; Shuaib, Y. A.; Khan, M. A.; Othman, I.; Kock, R.; Osman, A. Y.	2021	Elmi 2021	animal	8 February 2019 to 23 February 2020.	Malaysia	poultry farms	Fecal/Stool Samples	Escherichia coli	Oxytetracycline	0.58	150.22	259
Identification of Risk Factors Associated with Resistant Escherichia coli Isolates from Poultry Farms in the East Coast of Peninsular Malaysia: A Cross Sectional Study	Elmi, S. A.; Simons, D.; Elton, L.; Haider, N.; Abdel Hamid, M. M.; Shuaib, Y. A.; Khan, M. A.; Othman, I.; Kock, R.; Osman, A. Y.	2021	Elmi 2021	animal	8 February 2019 to 23 February 2020.	Malaysia	poultry farms	Cloacal samples	Escherichia coli	Sulfamethoxazole/trimethoprim	0.45	116.55	259
Identification of Risk Factors Associated with Resistant Escherichia coli Isolates from Poultry Farms in the East Coast of Peninsular Malaysia: A Cross Sectional Study	Elmi, S. A.; Simons, D.; Elton, L.; Haider, N.; Abdel Hamid, M. M.; Shuaib, Y. A.; Khan, M. A.; Othman, I.; Kock, R.; Osman, A. Y.	2021	Elmi 2021	animal	8 February 2019 to 23 February 2020.	Malaysia	poultry farms	Fecal/Stool Samples	Escherichia coli	Doxycycline	0.43	111.37	259
Identification of Risk Factors Associated with Resistant Escherichia coli Isolates from Poultry Farms in the East Coast of Peninsular Malaysia: A Cross Sectional Study	Elmi, S. A.; Simons, D.; Elton, L.; Haider, N.; Abdel Hamid, M. M.; Shuaib, Y. A.; Khan, M. A.; Othman, I.; Kock, R.; Osman, A. Y.	2021	Elmi 2021	animal	8 February 2019 to 23 February 2020.	Malaysia	poultry farms	Cloacal samples	Escherichia coli	Sulfamethoxazole	0.38	98.42	259
Identification of Risk Factors Associated with Resistant Escherichia coli Isolates from Poultry Farms in the East Coast of Peninsular Malaysia: A Cross Sectional Study	Elmi, S. A.; Simons, D.; Elton, L.; Haider, N.; Abdel Hamid, M. M.; Shuaib, Y. A.; Khan, M. A.; Othman, I.; Kock, R.; Osman, A. Y.	2021	Elmi 2021	animal	8 February 2019 to 23 February 2020.	Malaysia	poultry farms	Fecal/Stool Samples	Escherichia coli	Ampicillin	0.38	98.42	259
Identification of Risk Factors Associated with Resistant Escherichia coli Isolates from Poultry Farms in the East Coast of Peninsular Malaysia: A Cross Sectional Study	Elmi, S. A.; Simons, D.; Elton, L.; Haider, N.; Abdel Hamid, M. M.; Shuaib, Y. A.; Khan, M. A.; Othman, I.; Kock, R.; Osman, A. Y.	2021	Elmi 2021	animal	8 February 2019 to 23 February 2020.	Malaysia	poultry farms	Cloacal samples	Escherichia coli	Nalidixic acid	0.35	90.65	259
Identification of Risk Factors Associated with Resistant Escherichia coli Isolates from Poultry Farms in the East Coast of Peninsular Malaysia: A Cross Sectional Study	Elmi, S. A.; Simons, D.; Elton, L.; Haider, N.; Abdel Hamid, M. M.; Shuaib, Y. A.; Khan, M. A.; Othman, I.; Kock, R.; Osman, A. Y.	2021	Elmi 2021	animal	8 February 2019 to 23 February 2020.	Malaysia	poultry farms	Water samples	Escherichia coli	Ciprofloxacin	0.18	46.62	259
Identification of Risk Factors Associated with Resistant Escherichia coli Isolates from Poultry Farms in the East Coast of Peninsular Malaysia: A Cross Sectional Study	Elmi, S. A.; Simons, D.; Elton, L.; Haider, N.; Abdel Hamid, M. M.; Shuaib, Y. A.; Khan, M. A.; Othman, I.; Kock, R.; Osman, A. Y.	2021	Elmi 2021	animal	8 February 2019 to 23 February 2020.	Malaysia	poultry farms	Sewage/Wastewater/Sludge samples	Escherichia coli	Gentamycin	0.16	41.44	259
Identification of Risk Factors Associated with Resistant Escherichia coli Isolates from Poultry Farms in the East Coast of Peninsular Malaysia: A Cross Sectional Study	Elmi, S. A.; Simons, D.; Elton, L.; Haider, N.; Abdel Hamid, M. M.; Shuaib, Y. A.; Khan, M. A.; Othman, I.; Kock, R.; Osman, A. Y.	2021	Elmi 2021	animal	8 February 2019 to 23 February 2020.	Malaysia	poultry farms	Fecal/Stool Samples	Escherichia coli	Chloramphenicol	0.15	38.85	259
Identification of Risk Factors Associated with Resistant Escherichia coli Isolates from Poultry Farms in the East Coast of Peninsular Malaysia: A Cross Sectional Study	Elmi, S. A.; Simons, D.; Elton, L.; Haider, N.; Abdel Hamid, M. M.; Shuaib, Y. A.; Khan, M. A.; Othman, I.; Kock, R.; Osman, A. Y.	2021	Elmi 2021	animal	8 February 2019 to 23 February 2020.	Malaysia	poultry farms	Cloacal samples	Escherichia coli	Amoxicillin	0.12	31.08	259
Identification of Risk Factors Associated with Resistant Escherichia coli Isolates from Poultry Farms in the East Coast of Peninsular Malaysia: A Cross Sectional Study	Elmi, S. A.; Simons, D.; Elton, L.; Haider, N.; Abdel Hamid, M. M.; Shuaib, Y. A.; Khan, M. A.; Othman, I.; Kock, R.; Osman, A. Y.	2021	Elmi 2021	animal	8 February 2019 to 23 February 2020.	Malaysia	poultry farms	Water samples	Escherichia coli	Cefoxitin	0.08	20.72	259
Identification of Risk Factors Associated with Resistant Escherichia coli Isolates from Poultry Farms in the East Coast of Peninsular Malaysia: A Cross Sectional Study	Elmi, S. A.; Simons, D.; Elton, L.; Haider, N.; Abdel Hamid, M. M.; Shuaib, Y. A.; Khan, M. A.; Othman, I.; Kock, R.; Osman, A. Y.	2021	Elmi 2021	environmental	8 February 2019 to 23 February 2020.	Malaysia	poultry farms	Sewage/Wastewater/Sludge samples	Escherichia coli	Tetracycline	0.28	3.92	14
Identification of Risk Factors Associated with Resistant Escherichia coli Isolates from Poultry Farms in the East Coast of Peninsular Malaysia: A Cross Sectional Study	Elmi, S. A.; Simons, D.; Elton, L.; Haider, N.; Abdel Hamid, M. M.; Shuaib, Y. A.; Khan, M. A.; Othman, I.; Kock, R.; Osman, A. Y.	2021	Elmi 2021	environmental	8 February 2019 to 23 February 2020.	Malaysia	poultry farms	Fecal/Stool Samples	Escherichia coli	Ampicillin	0.28	3.92	14
Identification of Risk Factors Associated with Resistant Escherichia coli Isolates from Poultry Farms in the East Coast of Peninsular Malaysia: A Cross Sectional Study	Elmi, S. A.; Simons, D.; Elton, L.; Haider, N.; Abdel Hamid, M. M.; Shuaib, Y. A.; Khan, M. A.; Othman, I.; Kock, R.; Osman, A. Y.	2021	Elmi 2021	environmental	8 February 2019 to 23 February 2020.	Malaysia	poultry farms	Cloacal samples	Escherichia coli	Doxycycline	0.28	3.92	14
Identification of Risk Factors Associated with Resistant Escherichia coli Isolates from Poultry Farms in the East Coast of Peninsular Malaysia: A Cross Sectional Study	Elmi, S. A.; Simons, D.; Elton, L.; Haider, N.; Abdel Hamid, M. M.; Shuaib, Y. A.; Khan, M. A.; Othman, I.; Kock, R.; Osman, A. Y.	2021	Elmi 2021	environmental	8 February 2019 to 23 February 2020.	Malaysia	poultry farms	Sewage/Wastewater/Sludge samples	Escherichia coli	Oxytetracycline	0.2	2.8	14
Identification of Risk Factors Associated with Resistant Escherichia coli Isolates from Poultry Farms in the East Coast of Peninsular Malaysia: A Cross Sectional Study	Elmi, S. A.; Simons, D.; Elton, L.; Haider, N.; Abdel Hamid, M. M.; Shuaib, Y. A.; Khan, M. A.; Othman, I.; Kock, R.; Osman, A. Y.	2021	Elmi 2021	environmental	8 February 2019 to 23 February 2020.	Malaysia	poultry farms	Fecal/Stool Samples	Escherichia coli	Sulfamethoxazole	0.13	1.82	14
Identification of Risk Factors Associated with Resistant Escherichia coli Isolates from Poultry Farms in the East Coast of Peninsular Malaysia: A Cross Sectional Study	Elmi, S. A.; Simons, D.; Elton, L.; Haider, N.; Abdel Hamid, M. M.; Shuaib, Y. A.; Khan, M. A.; Othman, I.; Kock, R.; Osman, A. Y.	2021	Elmi 2021	environmental	8 February 2019 to 23 February 2020.	Malaysia	poultry farms	Cloacal samples	Escherichia coli	Sulfamethoxazole/trimethoprim	0.13	1.82	14
Identification of Risk Factors Associated with Resistant Escherichia coli Isolates from Poultry Farms in the East Coast of Peninsular Malaysia: A Cross Sectional Study	Elmi, S. A.; Simons, D.; Elton, L.; Haider, N.; Abdel Hamid, M. M.; Shuaib, Y. A.; Khan, M. A.; Othman, I.; Kock, R.; Osman, A. Y.	2021	Elmi 2021	environmental	8 February 2019 to 23 February 2020.	Malaysia	poultry farms	Water samples	Escherichia coli	Nalidixic acid	0.07	0.98	14
Identification of Risk Factors Associated with Resistant Escherichia coli Isolates from Poultry Farms in the East Coast of Peninsular Malaysia: A Cross Sectional Study	Elmi, S. A.; Simons, D.; Elton, L.; Haider, N.; Abdel Hamid, M. M.; Shuaib, Y. A.; Khan, M. A.; Othman, I.; Kock, R.; Osman, A. Y.	2021	Elmi 2021	environmental	8 February 2019 to 23 February 2020.	Malaysia	poultry farms	Sewage/Wastewater/Sludge samples	Escherichia coli	Amoxicillin	0.07	0.98	14
Identification of Risk Factors Associated with Resistant Escherichia coli Isolates from Poultry Farms in the East Coast of Peninsular Malaysia: A Cross Sectional Study	Elmi, S. A.; Simons, D.; Elton, L.; Haider, N.; Abdel Hamid, M. M.; Shuaib, Y. A.; Khan, M. A.; Othman, I.; Kock, R.; Osman, A. Y.	2021	Elmi 2021	environmental	8 February 2019 to 23 February 2020.	Malaysia	poultry farms	Fecal/Stool Samples	Escherichia coli	Gentamycin	0.07	0.98	14
Identification of Risk Factors Associated with Resistant Escherichia coli Isolates from Poultry Farms in the East Coast of Peninsular Malaysia: A Cross Sectional Study	Elmi, S. A.; Simons, D.; Elton, L.; Haider, N.; Abdel Hamid, M. M.; Shuaib, Y. A.; Khan, M. A.; Othman, I.; Kock, R.; Osman, A. Y.	2021	Elmi 2021	environmental	8 February 2019 to 23 February 2020.	Malaysia	poultry farms	Cloacal samples	Escherichia coli	Chloramphenicol	0	0	14
Identification of Risk Factors Associated with Resistant Escherichia coli Isolates from Poultry Farms in the East Coast of Peninsular Malaysia: A Cross Sectional Study	Elmi, S. A.; Simons, D.; Elton, L.; Haider, N.; Abdel Hamid, M. M.; Shuaib, Y. A.; Khan, M. A.; Othman, I.; Kock, R.; Osman, A. Y.	2021	Elmi 2021	environmental	8 February 2019 to 23 February 2020.	Malaysia	poultry farms		Escherichia coli	Cefoxitin	0	0	14
Identification of Risk Factors Associated with Resistant Escherichia coli Isolates from Poultry Farms in the East Coast of Peninsular Malaysia: A Cross Sectional Study	Elmi, S. A.; Simons, D.; Elton, L.; Haider, N.; Abdel Hamid, M. M.; Shuaib, Y. A.; Khan, M. A.; Othman, I.; Kock, R.; Osman, A. Y.	2021	Elmi 2021	environmental	8 February 2019 to 23 February 2020.	Malaysia	poultry farms		Escherichia coli	Ciprofloxacin	0	0	14
Identification of Risk Factors Associated with Resistant Escherichia coli Isolates from Poultry Farms in the East Coast of Peninsular Malaysia: A Cross Sectional Study	Elmi, S. A.; Simons, D.; Elton, L.; Haider, N.; Abdel Hamid, M. M.; Shuaib, Y. A.; Khan, M. A.; Othman, I.; Kock, R.; Osman, A. Y.	2021	Elmi 2021	animal	8 February 2019 to 23 February 2020.	Malaysia	poultry farms		Escherichia coli	Tetracycline	0.68	57.12	84
Identification of Risk Factors Associated with Resistant Escherichia coli Isolates from Poultry Farms in the East Coast of Peninsular Malaysia: A Cross Sectional Study	Elmi, S. A.; Simons, D.; Elton, L.; Haider, N.; Abdel Hamid, M. M.; Shuaib, Y. A.; Khan, M. A.; Othman, I.; Kock, R.; Osman, A. Y.	2021	Elmi 2021	animal	8 February 2019 to 23 February 2020.	Malaysia	poultry farms		Escherichia coli	Oxytetracycline	0.6	50.4	84
Identification of Risk Factors Associated with Resistant Escherichia coli Isolates from Poultry Farms in the East Coast of Peninsular Malaysia: A Cross Sectional Study	Elmi, S. A.; Simons, D.; Elton, L.; Haider, N.; Abdel Hamid, M. M.; Shuaib, Y. A.; Khan, M. A.; Othman, I.; Kock, R.; Osman, A. Y.	2021	Elmi 2021	animal	8 February 2019 to 23 February 2020.	Malaysia	poultry farms		Escherichia coli	Sulfamethoxazole/trimethoprim	0.55	46.2	84
Identification of Risk Factors Associated with Resistant Escherichia coli Isolates from Poultry Farms in the East Coast of Peninsular Malaysia: A Cross Sectional Study	Elmi, S. A.; Simons, D.; Elton, L.; Haider, N.; Abdel Hamid, M. M.; Shuaib, Y. A.; Khan, M. A.; Othman, I.; Kock, R.; Osman, A. Y.	2021	Elmi 2021	animal	8 February 2019 to 23 February 2020.	Malaysia	poultry farms		Escherichia coli	Doxycycline	0.5	42	84
Identification of Risk Factors Associated with Resistant Escherichia coli Isolates from Poultry Farms in the East Coast of Peninsular Malaysia: A Cross Sectional Study	Elmi, S. A.; Simons, D.; Elton, L.; Haider, N.; Abdel Hamid, M. M.; Shuaib, Y. A.; Khan, M. A.; Othman, I.; Kock, R.; Osman, A. Y.	2021	Elmi 2021	animal	8 February 2019 to 23 February 2020.	Malaysia	poultry farms		Escherichia coli	Sulfamethoxazole	0.48	40.32	84
Identification of Risk Factors Associated with Resistant Escherichia coli Isolates from Poultry Farms in the East Coast of Peninsular Malaysia: A Cross Sectional Study	Elmi, S. A.; Simons, D.; Elton, L.; Haider, N.; Abdel Hamid, M. M.; Shuaib, Y. A.; Khan, M. A.; Othman, I.; Kock, R.; Osman, A. Y.	2021	Elmi 2021	animal	8 February 2019 to 23 February 2020.	Malaysia	poultry farms		Escherichia coli	Ampicillin	0.38	31.92	84
Identification of Risk Factors Associated with Resistant Escherichia coli Isolates from Poultry Farms in the East Coast of Peninsular Malaysia: A Cross Sectional Study	Elmi, S. A.; Simons, D.; Elton, L.; Haider, N.; Abdel Hamid, M. M.; Shuaib, Y. A.; Khan, M. A.; Othman, I.; Kock, R.; Osman, A. Y.	2021	Elmi 2021	animal	8 February 2019 to 23 February 2020.	Malaysia	poultry farms		Escherichia coli	Nalidixic acid	0.35	29.4	84
Identification of Risk Factors Associated with Resistant Escherichia coli Isolates from Poultry Farms in the East Coast of Peninsular Malaysia: A Cross Sectional Study	Elmi, S. A.; Simons, D.; Elton, L.; Haider, N.; Abdel Hamid, M. M.; Shuaib, Y. A.; Khan, M. A.; Othman, I.; Kock, R.; Osman, A. Y.	2021	Elmi 2021	animal	8 February 2019 to 23 February 2020.	Malaysia	poultry farms		Escherichia coli	Ciprofloxacin	0.25	21	84
Identification of Risk Factors Associated with Resistant Escherichia coli Isolates from Poultry Farms in the East Coast of Peninsular Malaysia: A Cross Sectional Study	Elmi, S. A.; Simons, D.; Elton, L.; Haider, N.; Abdel Hamid, M. M.; Shuaib, Y. A.; Khan, M. A.; Othman, I.; Kock, R.; Osman, A. Y.	2021	Elmi 2021	animal	8 February 2019 to 23 February 2020.	Malaysia	poultry farms		Escherichia coli	Gentamycin	0.22	18.48	84
Identification of Risk Factors Associated with Resistant Escherichia coli Isolates from Poultry Farms in the East Coast of Peninsular Malaysia: A Cross Sectional Study	Elmi, S. A.; Simons, D.; Elton, L.; Haider, N.; Abdel Hamid, M. M.; Shuaib, Y. A.; Khan, M. A.; Othman, I.; Kock, R.; Osman, A. Y.	2021	Elmi 2021	animal	8 February 2019 to 23 February 2020.	Malaysia	poultry farms		Escherichia coli	Chloramphenicol	0.2	16.8	84
Identification of Risk Factors Associated with Resistant Escherichia coli Isolates from Poultry Farms in the East Coast of Peninsular Malaysia: A Cross Sectional Study	Elmi, S. A.; Simons, D.; Elton, L.; Haider, N.; Abdel Hamid, M. M.; Shuaib, Y. A.; Khan, M. A.; Othman, I.; Kock, R.; Osman, A. Y.	2021	Elmi 2021	animal	8 February 2019 to 23 February 2020.	Malaysia	poultry farms		Escherichia coli	Amoxicillin	0.1	8.4	84
Identification of Risk Factors Associated with Resistant Escherichia coli Isolates from Poultry Farms in the East Coast of Peninsular Malaysia: A Cross Sectional Study	Elmi, S. A.; Simons, D.; Elton, L.; Haider, N.; Abdel Hamid, M. M.; Shuaib, Y. A.; Khan, M. A.; Othman, I.; Kock, R.; Osman, A. Y.	2021	Elmi 2021	environmental	8 February 2019 to 23 February 2020.	Malaysia	poultry farms		Escherichia coli	Cefoxitin	0.1	8.4	84
Identification of Risk Factors Associated with Resistant Escherichia coli Isolates from Poultry Farms in the East Coast of Peninsular Malaysia: A Cross Sectional Study	Elmi, S. A.; Simons, D.; Elton, L.; Haider, N.; Abdel Hamid, M. M.; Shuaib, Y. A.; Khan, M. A.; Othman, I.; Kock, R.; Osman, A. Y.	2021	Elmi 2021	environmental	8 February 2019 to 23 February 2020.	Malaysia	poultry farms		Escherichia coli	Tetracycline	0	0	14
Identification of Risk Factors Associated with Resistant Escherichia coli Isolates from Poultry Farms in the East Coast of Peninsular Malaysia: A Cross Sectional Study	Elmi, S. A.; Simons, D.; Elton, L.; Haider, N.; Abdel Hamid, M. M.; Shuaib, Y. A.; Khan, M. A.; Othman, I.; Kock, R.; Osman, A. Y.	2021	Elmi 2021	environmental	8 February 2019 to 23 February 2020.	Malaysia	poultry farms		Escherichia coli	Nalidixic acid	0	0	14
Identification of Risk Factors Associated with Resistant Escherichia coli Isolates from Poultry Farms in the East Coast of Peninsular Malaysia: A Cross Sectional Study	Elmi, S. A.; Simons, D.; Elton, L.; Haider, N.; Abdel Hamid, M. M.; Shuaib, Y. A.; Khan, M. A.; Othman, I.; Kock, R.; Osman, A. Y.	2021	Elmi 2021	environmental	8 February 2019 to 23 February 2020.	Malaysia	poultry farms		Escherichia coli	Ampicillin	0	0	14
Identification of Risk Factors Associated with Resistant Escherichia coli Isolates from Poultry Farms in the East Coast of Peninsular Malaysia: A Cross Sectional Study	Elmi, S. A.; Simons, D.; Elton, L.; Haider, N.; Abdel Hamid, M. M.; Shuaib, Y. A.; Khan, M. A.; Othman, I.; Kock, R.; Osman, A. Y.	2021	Elmi 2021	environmental	8 February 2019 to 23 February 2020.	Malaysia	poultry farms		Escherichia coli	Oxytetracycline	0	0	14
Identification of Risk Factors Associated with Resistant Escherichia coli Isolates from Poultry Farms in the East Coast of Peninsular Malaysia: A Cross Sectional Study	Elmi, S. A.; Simons, D.; Elton, L.; Haider, N.; Abdel Hamid, M. M.; Shuaib, Y. A.; Khan, M. A.; Othman, I.; Kock, R.; Osman, A. Y.	2021	Elmi 2021	environmental	8 February 2019 to 23 February 2020.	Malaysia	poultry farms		Escherichia coli	Sulfamethoxazole	0	0	14
Identification of Risk Factors Associated with Resistant Escherichia coli Isolates from Poultry Farms in the East Coast of Peninsular Malaysia: A Cross Sectional Study	Elmi, S. A.; Simons, D.; Elton, L.; Haider, N.; Abdel Hamid, M. M.; Shuaib, Y. A.; Khan, M. A.; Othman, I.; Kock, R.; Osman, A. Y.	2021	Elmi 2021	environmental	8 February 2019 to 23 February 2020.	Malaysia	poultry farms		Escherichia coli	Sulfamethoxazole/trimethoprim	0	0	14
Identification of Risk Factors Associated with Resistant Escherichia coli Isolates from Poultry Farms in the East Coast of Peninsular Malaysia: A Cross Sectional Study	Elmi, S. A.; Simons, D.; Elton, L.; Haider, N.; Abdel Hamid, M. M.; Shuaib, Y. A.; Khan, M. A.; Othman, I.; Kock, R.; Osman, A. Y.	2021	Elmi 2021	environmental	8 February 2019 to 23 February 2020.	Malaysia	poultry farms		Escherichia coli	Doxycycline	0	0	14
Identification of Risk Factors Associated with Resistant Escherichia coli Isolates from Poultry Farms in the East Coast of Peninsular Malaysia: A Cross Sectional Study	Elmi, S. A.; Simons, D.; Elton, L.; Haider, N.; Abdel Hamid, M. M.; Shuaib, Y. A.; Khan, M. A.; Othman, I.; Kock, R.; Osman, A. Y.	2021	Elmi 2021	environmental	8 February 2019 to 23 February 2020.	Malaysia	poultry farms		Escherichia coli	Amoxicillin	0	0	14
Identification of Risk Factors Associated with Resistant Escherichia coli Isolates from Poultry Farms in the East Coast of Peninsular Malaysia: A Cross Sectional Study	Elmi, S. A.; Simons, D.; Elton, L.; Haider, N.; Abdel Hamid, M. M.; Shuaib, Y. A.; Khan, M. A.; Othman, I.; Kock, R.; Osman, A. Y.	2021	Elmi 2021	environmental	8 February 2019 to 23 February 2020.	Malaysia	poultry farms		Escherichia coli	Chloramphenicol	0	0	14
Identification of Risk Factors Associated with Resistant Escherichia coli Isolates from Poultry Farms in the East Coast of Peninsular Malaysia: A Cross Sectional Study	Elmi, S. A.; Simons, D.; Elton, L.; Haider, N.; Abdel Hamid, M. M.; Shuaib, Y. A.; Khan, M. A.; Othman, I.; Kock, R.; Osman, A. Y.	2021	Elmi 2021	environmental	8 February 2019 to 23 February 2020.	Malaysia	poultry farms		Escherichia coli	Gentamycin	0	0	14
Identification of Risk Factors Associated with Resistant Escherichia coli Isolates from Poultry Farms in the East Coast of Peninsular Malaysia: A Cross Sectional Study	Elmi, S. A.; Simons, D.; Elton, L.; Haider, N.; Abdel Hamid, M. M.; Shuaib, Y. A.; Khan, M. A.; Othman, I.; Kock, R.; Osman, A. Y.	2021	Elmi 2021	environmental	8 February 2019 to 23 February 2020.	Malaysia	poultry farms		Escherichia coli	Cefoxitin	0	0	14
Identification of Risk Factors Associated with Resistant Escherichia coli Isolates from Poultry Farms in the East Coast of Peninsular Malaysia: A Cross Sectional Study	Elmi, S. A.; Simons, D.; Elton, L.; Haider, N.; Abdel Hamid, M. M.; Shuaib, Y. A.; Khan, M. A.; Othman, I.; Kock, R.; Osman, A. Y.	2021	Elmi 2021	environmental	8 February 2019 to 23 February 2020.	Malaysia	poultry farms		Escherichia coli	Ciprofloxacin	0	0	14
Detection of extended-spectrum 尾-lactamase-producing Escherichia coli genes isolated from cat rectal swabs at Surabaya Veterinary Hospital, Indonesia	Farizqi, M. T. I.; Effendi, M. H.; Adikara, R. T. S.; Yudaniayanti, I. S.; Putra, G. D. S.; Khairullah, A. R.; Kurniawan, S. C.; Silaen, O. S. M.; Ramadhani, S.; Millannia, S. K.; Kaben, S. E.; Waruwu, Y. K. K.	2023	Farizqi 2023	animal	from March 2023 to April 2023	Indonesia	Vet hospital	Rectal swabs	Escherichia coli	Ampicillin	0.3239	23	71
Detection of extended-spectrum 尾-lactamase-producing Escherichia coli genes isolated from cat rectal swabs at Surabaya Veterinary Hospital, Indonesia	Farizqi, M. T. I.; Effendi, M. H.; Adikara, R. T. S.; Yudaniayanti, I. S.; Putra, G. D. S.; Khairullah, A. R.; Kurniawan, S. C.; Silaen, O. S. M.; Ramadhani, S.; Millannia, S. K.; Kaben, S. E.; Waruwu, Y. K. K.	2023	Farizqi 2023	animal	from March 2023 to April 2023	Indonesia	Vet hospital	Rectal swabs	Escherichia coli	Ampicillin/Chloramphenicol	0.0141	1	71
Detection of extended-spectrum 尾-lactamase-producing Escherichia coli genes isolated from cat rectal swabs at Surabaya Veterinary Hospital, Indonesia	Farizqi, M. T. I.; Effendi, M. H.; Adikara, R. T. S.; Yudaniayanti, I. S.; Putra, G. D. S.; Khairullah, A. R.; Kurniawan, S. C.; Silaen, O. S. M.; Ramadhani, S.; Millannia, S. K.; Kaben, S. E.; Waruwu, Y. K. K.	2023	Farizqi 2023	animal	from March 2023 to April 2023	Indonesia	Vet hospital	Rectal swabs	Escherichia coli	Ampicillin/Tetracycline	0.0422	3	71
Detection of extended-spectrum 尾-lactamase-producing Escherichia coli genes isolated from cat rectal swabs at Surabaya Veterinary Hospital, Indonesia	Farizqi, M. T. I.; Effendi, M. H.; Adikara, R. T. S.; Yudaniayanti, I. S.; Putra, G. D. S.; Khairullah, A. R.; Kurniawan, S. C.; Silaen, O. S. M.; Ramadhani, S.; Millannia, S. K.; Kaben, S. E.; Waruwu, Y. K. K.	2023	Farizqi 2023	animal	from March 2023 to April 2023	Indonesia	Vet hospital	Rectal swabs	Escherichia coli	Aztreonam	0.0422	3	71
Detection of extended-spectrum 尾-lactamase-producing Escherichia coli genes isolated from cat rectal swabs at Surabaya Veterinary Hospital, Indonesia	Farizqi, M. T. I.; Effendi, M. H.; Adikara, R. T. S.; Yudaniayanti, I. S.; Putra, G. D. S.; Khairullah, A. R.; Kurniawan, S. C.; Silaen, O. S. M.; Ramadhani, S.; Millannia, S. K.; Kaben, S. E.; Waruwu, Y. K. K.	2023	Farizqi 2023	animal	from March 2023 to April 2023	Indonesia	Vet hospital	Rectal swabs	Escherichia coli	Chloramphenicol	0.0704	5	71
Detection of extended-spectrum 尾-lactamase-producing Escherichia coli genes isolated from cat rectal swabs at Surabaya Veterinary Hospital, Indonesia	Farizqi, M. T. I.; Effendi, M. H.; Adikara, R. T. S.; Yudaniayanti, I. S.; Putra, G. D. S.; Khairullah, A. R.; Kurniawan, S. C.; Silaen, O. S. M.; Ramadhani, S.; Millannia, S. K.; Kaben, S. E.; Waruwu, Y. K. K.	2023	Farizqi 2023	animal	from March 2023 to April 2023	Indonesia	Vet hospital	Rectal swabs	Escherichia coli	Gentamicin	0.0563	4	71
Detection of extended-spectrum 尾-lactamase-producing Escherichia coli genes isolated from cat rectal swabs at Surabaya Veterinary Hospital, Indonesia	Farizqi, M. T. I.; Effendi, M. H.; Adikara, R. T. S.; Yudaniayanti, I. S.; Putra, G. D. S.; Khairullah, A. R.; Kurniawan, S. C.; Silaen, O. S. M.; Ramadhani, S.; Millannia, S. K.; Kaben, S. E.; Waruwu, Y. K. K.	2023	Farizqi 2023	animal	from March 2023 to April 2023	Indonesia	Vet hospital	Rectal swabs	Escherichia coli	Gentamicin/Ampicillin	0.0141	1	71
Detection of extended-spectrum 尾-lactamase-producing Escherichia coli genes isolated from cat rectal swabs at Surabaya Veterinary Hospital, Indonesia	Farizqi, M. T. I.; Effendi, M. H.; Adikara, R. T. S.; Yudaniayanti, I. S.; Putra, G. D. S.; Khairullah, A. R.; Kurniawan, S. C.; Silaen, O. S. M.; Ramadhani, S.; Millannia, S. K.; Kaben, S. E.; Waruwu, Y. K. K.	2023	Farizqi 2023	animal	from March 2023 to April 2023	Indonesia	Vet hospital	Rectal swabs	Escherichia coli	Multidrug resistance	0.0141	1	71
Detection of extended-spectrum 尾-lactamase-producing Escherichia coli genes isolated from cat rectal swabs at Surabaya Veterinary Hospital, Indonesia	Farizqi, M. T. I.; Effendi, M. H.; Adikara, R. T. S.; Yudaniayanti, I. S.; Putra, G. D. S.; Khairullah, A. R.; Kurniawan, S. C.; Silaen, O. S. M.; Ramadhani, S.; Millannia, S. K.; Kaben, S. E.; Waruwu, Y. K. K.	2023	Farizqi 2023	animal	from March 2023 to April 2023	Indonesia	Vet hospital	Rectal swabs	Escherichia coli	Multidrug resistance	0.0141	1	71
Detection of extended-spectrum 尾-lactamase-producing Escherichia coli genes isolated from cat rectal swabs at Surabaya Veterinary Hospital, Indonesia	Farizqi, M. T. I.; Effendi, M. H.; Adikara, R. T. S.; Yudaniayanti, I. S.; Putra, G. D. S.; Khairullah, A. R.; Kurniawan, S. C.; Silaen, O. S. M.; Ramadhani, S.; Millannia, S. K.; Kaben, S. E.; Waruwu, Y. K. K.	2023	Farizqi 2023	animal	from March 2023 to April 2023	Indonesia	Vet hospital	Rectal swabs	Escherichia coli	Multidrug resistance	0.0141	1	71
Detection of extended-spectrum 尾-lactamase-producing Escherichia coli genes isolated from cat rectal swabs at Surabaya Veterinary Hospital, Indonesia	Farizqi, M. T. I.; Effendi, M. H.; Adikara, R. T. S.; Yudaniayanti, I. S.; Putra, G. D. S.; Khairullah, A. R.; Kurniawan, S. C.; Silaen, O. S. M.; Ramadhani, S.; Millannia, S. K.; Kaben, S. E.; Waruwu, Y. K. K.	2023	Farizqi 2023	animal	from March 2023 to April 2023	Indonesia	Vet hospital	Rectal swabs	Escherichia coli	Multidrug resistance	0.0141	1	71
Detection of extended-spectrum 尾-lactamase-producing Escherichia coli genes isolated from cat rectal swabs at Surabaya Veterinary Hospital, Indonesia	Farizqi, M. T. I.; Effendi, M. H.; Adikara, R. T. S.; Yudaniayanti, I. S.; Putra, G. D. S.; Khairullah, A. R.; Kurniawan, S. C.; Silaen, O. S. M.; Ramadhani, S.; Millannia, S. K.; Kaben, S. E.; Waruwu, Y. K. K.	2023	Farizqi 2023	animal	from March 2023 to April 2023	Indonesia	Vet hospital	Rectal swabs	Escherichia coli	Tetracycline	0.0704	5	71
Antimicrobial Resistance in Invasive Bacterial Infections in Hospitalized Children, Cambodia, 2007-2016	Fox-Lewis, A.; Takata, J.; Miliya, T.; Lubell, Y.; Soeng, S.; Sar, P.; Rith, K.; McKellar, G.; Wuthiekanun, V.; McGonagle, E.; Stoesser, N.; Moore, C. E.; Parry, C. M.; Turner, C.; Day, N. P. J.; Cooper, B. S.; Turner, P.	2018	Fox-Lewis 2018	human	2013-2014	Cambodia	hospital	Clinical samples	Escherichia coli	Ampicillin/Gentamicin	0.566667	17	30
Antimicrobial Resistance in Invasive Bacterial Infections in Hospitalized Children, Cambodia, 2007-2016	Fox-Lewis, A.; Takata, J.; Miliya, T.; Lubell, Y.; Soeng, S.; Sar, P.; Rith, K.; McKellar, G.; Wuthiekanun, V.; McGonagle, E.; Stoesser, N.; Moore, C. E.; Parry, C. M.; Turner, C.; Day, N. P. J.; Cooper, B. S.; Turner, P.	2018	Fox-Lewis 2018	human	2015-2016	Cambodia	hospital	Clinical samples	Escherichia coli	Ampicillin/Gentamicin	0.409091	9	22
Antimicrobial Resistance in Invasive Bacterial Infections in Hospitalized Children, Cambodia, 2007-2016	Fox-Lewis, A.; Takata, J.; Miliya, T.; Lubell, Y.; Soeng, S.; Sar, P.; Rith, K.; McKellar, G.; Wuthiekanun, V.; McGonagle, E.; Stoesser, N.; Moore, C. E.; Parry, C. M.; Turner, C.; Day, N. P. J.; Cooper, B. S.; Turner, P.	2018	Fox-Lewis 2018	human	2013-2014	Cambodia	hospital	Clinical samples	Klebsiella pneumoniae	Ampicillin/Gentamicin	0.619048	26	42
Antimicrobial Resistance in Invasive Bacterial Infections in Hospitalized Children, Cambodia, 2007-2016	Fox-Lewis, A.; Takata, J.; Miliya, T.; Lubell, Y.; Soeng, S.; Sar, P.; Rith, K.; McKellar, G.; Wuthiekanun, V.; McGonagle, E.; Stoesser, N.; Moore, C. E.; Parry, C. M.; Turner, C.; Day, N. P. J.; Cooper, B. S.; Turner, P.	2018	Fox-Lewis 2018	human	2015-2016	Cambodia	hospital	Clinical samples	Klebsiella pneumoniae	Ampicillin/Gentamicin	0.15	3	20
Antimicrobial Resistance in Invasive Bacterial Infections in Hospitalized Children, Cambodia, 2007-2016				human	2013-2014	Cambodia	hospital	Clinical samples	Non-typhoidal Salmonella	Ceftriaxone	0	0	9
Antimicrobial Resistance in Invasive Bacterial Infections in Hospitalized Children, Cambodia, 2007-2016				human	2015-2016	Cambodia	hospital	Clinical samples	Non-typhoidal Salmonella	Ceftriaxone	0.142857	2	14
Antimicrobial Resistance in Invasive Bacterial Infections in Hospitalized Children, Cambodia, 2007-2016				human	2013-2014	Cambodia	hospital	Clinical samples	Salmonella spp.	Ceftriaxone	0	0	40
Antimicrobial Resistance in Invasive Bacterial Infections in Hospitalized Children, Cambodia, 2007-2016				human	2015-2016	Cambodia	hospital	Clinical samples	Salmonella spp.	Ceftriaxone	0	0	42
Antimicrobial Resistance in Invasive Bacterial Infections in Hospitalized Children, Cambodia, 2007-2016				human	2013-2014	Cambodia	hospital	Clinical samples	Salmonella spp.	Ceftriaxone	0	0	35
Antimicrobial Resistance in Invasive Bacterial Infections in Hospitalized Children, Cambodia, 2007-2016				human	2015-2016	Cambodia	hospital	Clinical samples	Salmonella spp.	Ceftriaxone	0	0	6
Antimicrobial Resistance in Invasive Bacterial Infections in Hospitalized Children, Cambodia, 2007-2016	Fox-Lewis, A.; Takata, J.; Miliya, T.; Lubell, Y.; Soeng, S.; Sar, P.; Rith, K.; McKellar, G.; Wuthiekanun, V.; McGonagle, E.; Stoesser, N.; Moore, C. E.; Parry, C. M.; Turner, C.; Day, N. P. J.; Cooper, B. S.; Turner, P.	2018	Fox-Lewis 2018	human	2013-2014	Cambodia	hospital	Clinical samples	Escherichia coli	Multidrug resistance	0.533333	16	30
Antimicrobial Resistance in Invasive Bacterial Infections in Hospitalized Children, Cambodia, 2007-2016	Fox-Lewis, A.; Takata, J.; Miliya, T.; Lubell, Y.; Soeng, S.; Sar, P.; Rith, K.; McKellar, G.; Wuthiekanun, V.; McGonagle, E.; Stoesser, N.; Moore, C. E.; Parry, C. M.; Turner, C.; Day, N. P. J.; Cooper, B. S.; Turner, P.	2018	Fox-Lewis 2018	human	2015-2016	Cambodia	hospital	Clinical samples	Escherichia coli	Multidrug resistance	0.545455	12	22
Antimicrobial Resistance in Invasive Bacterial Infections in Hospitalized Children, Cambodia, 2007-2016	Fox-Lewis, A.; Takata, J.; Miliya, T.; Lubell, Y.; Soeng, S.; Sar, P.; Rith, K.; McKellar, G.; Wuthiekanun, V.; McGonagle, E.; Stoesser, N.; Moore, C. E.; Parry, C. M.; Turner, C.; Day, N. P. J.; Cooper, B. S.; Turner, P.	2018	Fox-Lewis 2018	human	2013-2014	Cambodia	hospital	Clinical samples	Klebsiella pneumoniae	Multidrug resistance	0.857143	36	42
Antimicrobial Resistance in Invasive Bacterial Infections in Hospitalized Children, Cambodia, 2007-2016	Fox-Lewis, A.; Takata, J.; Miliya, T.; Lubell, Y.; Soeng, S.; Sar, P.; Rith, K.; McKellar, G.; Wuthiekanun, V.; McGonagle, E.; Stoesser, N.; Moore, C. E.; Parry, C. M.; Turner, C.; Day, N. P. J.; Cooper, B. S.; Turner, P.	2018	Fox-Lewis 2018	human	2015-2016	Cambodia	hospital	Clinical samples	Klebsiella pneumoniae	Multidrug resistance	0.35	7	20
Antimicrobial Resistance in Invasive Bacterial Infections in Hospitalized Children, Cambodia, 2007-2016				human	2013-2014	Cambodia	hospital	Clinical samples	Non-typhoidal Salmonella	Multidrug resistance	0.222222	2	9
Antimicrobial Resistance in Invasive Bacterial Infections in Hospitalized Children, Cambodia, 2007-2016				human	2015-2016	Cambodia	hospital	Clinical samples	Non-typhoidal Salmonella	Multidrug resistance	0.0714286	1	14
Antimicrobial Resistance in Invasive Bacterial Infections in Hospitalized Children, Cambodia, 2007-2016				human	2013-2014	Cambodia	hospital	Clinical samples	Non-typhoidal Salmonella	Multidrug resistance	0	0	9
Antimicrobial Resistance in Invasive Bacterial Infections in Hospitalized Children, Cambodia, 2007-2016				human	2015-2016	Cambodia	hospital	Clinical samples	Non-typhoidal Salmonella	Multidrug resistance	0.0714286	1	14
Antimicrobial Resistance in Invasive Bacterial Infections in Hospitalized Children, Cambodia, 2007-2016				human	2013-2014	Cambodia	hospital	Clinical samples	Salmonella spp.	Multidrug resistance	0.875	35	40
Antimicrobial Resistance in Invasive Bacterial Infections in Hospitalized Children, Cambodia, 2007-2016				human	2015-2016	Cambodia	hospital	Clinical samples	Salmonella spp.	Multidrug resistance	0.738095	31	42
Antimicrobial Resistance in Invasive Bacterial Infections in Hospitalized Children, Cambodia, 2007-2016				human	2013-2014	Cambodia	hospital	Clinical samples	Salmonella spp.	Multidrug resistance	0	0	35
Antimicrobial Resistance in Invasive Bacterial Infections in Hospitalized Children, Cambodia, 2007-2016				human	2015-2016	Cambodia	hospital	Clinical samples	Salmonella spp.	Multidrug resistance	0	0	6
Antimicrobial Resistance in Invasive Bacterial Infections in Hospitalized Children, Cambodia, 2007-2016				human	2013-2014	Cambodia	hospital	Clinical samples	Salmonella spp.	Multidrug resistance	0.875	35	40
Antimicrobial Resistance in Invasive Bacterial Infections in Hospitalized Children, Cambodia, 2007-2016				human	2015-2016	Cambodia	hospital	Clinical samples	Salmonella spp.	Multidrug resistance	0.738095	31	42
Antimicrobial Resistance in Invasive Bacterial Infections in Hospitalized Children, Cambodia, 2007-2016				human	2013-2014	Cambodia	hospital	Clinical samples	Salmonella spp.	Multidrug resistance	0	0	35
Antimicrobial Resistance in Invasive Bacterial Infections in Hospitalized Children, Cambodia, 2007-2016				human	2015-2016	Cambodia	hospital	Clinical samples	Salmonella spp.	Multidrug resistance	0	0	6
Antimicrobials use and resistance on integrated poultry-fish farming systems in the Ayeyarwady Delta of Myanmar	Gibson, J. S.; Wai, H.; Oo, Ssml; Hmwe, E. M. M.; Wai, S. S.; Htun, L. L.; Lim, H. P.; Latt, Z. M.; Henning, J.	2020	Gibson 2020	animal	From February 2017 to July 2017	Myanmar	poultry farms	Other	Escherichia coli	Amoxicillin	0.431	31	72
Antimicrobials use and resistance on integrated poultry-fish farming systems in the Ayeyarwady Delta of Myanmar	Gibson, J. S.; Wai, H.; Oo, Ssml; Hmwe, E. M. M.; Wai, S. S.; Htun, L. L.; Lim, H. P.; Latt, Z. M.; Henning, J.	2020	Gibson 2020	animal	From February 2017 to July 2017	Myanmar	poultry farms	Animal samples	Escherichia coli	Amoxicillin	0.184	41	223
Antimicrobials use and resistance on integrated poultry-fish farming systems in the Ayeyarwady Delta of Myanmar	Gibson, J. S.; Wai, H.; Oo, Ssml; Hmwe, E. M. M.; Wai, S. S.; Htun, L. L.; Lim, H. P.; Latt, Z. M.; Henning, J.	2020	Gibson 2020	animal	From February 2017 to July 2017	Myanmar	poultry farms	Fecal/Stool Samples	Escherichia coli	Amoxicillin/clavulanic acid	0.038	7	183
Antimicrobials use and resistance on integrated poultry-fish farming systems in the Ayeyarwady Delta of Myanmar	Gibson, J. S.; Wai, H.; Oo, Ssml; Hmwe, E. M. M.; Wai, S. S.; Htun, L. L.; Lim, H. P.; Latt, Z. M.; Henning, J.	2020	Gibson 2020	animal	From February 2017 to July 2017	Myanmar	poultry farms	Fecal/Stool Samples	Escherichia coli	Ampicillin/Amoxicillin	0.546	100	183
Antimicrobials use and resistance on integrated poultry-fish farming systems in the Ayeyarwady Delta of Myanmar	Gibson, J. S.; Wai, H.; Oo, Ssml; Hmwe, E. M. M.; Wai, S. S.; Htun, L. L.; Lim, H. P.; Latt, Z. M.; Henning, J.	2020	Gibson 2020	animal	From February 2017 to July 2017	Myanmar	poultry farms	Fecal/Stool Samples	Escherichia coli	Cefoxitin	0.022	4	183
Antimicrobials use and resistance on integrated poultry-fish farming systems in the Ayeyarwady Delta of Myanmar	Gibson, J. S.; Wai, H.; Oo, Ssml; Hmwe, E. M. M.; Wai, S. S.; Htun, L. L.; Lim, H. P.; Latt, Z. M.; Henning, J.	2020	Gibson 2020	animal	From February 2017 to July 2017	Myanmar	poultry farms	Fecal/Stool Samples	Escherichia coli	Cephalothin	0.102	19	183
Antimicrobials use and resistance on integrated poultry-fish farming systems in the Ayeyarwady Delta of Myanmar	Gibson, J. S.; Wai, H.; Oo, Ssml; Hmwe, E. M. M.; Wai, S. S.; Htun, L. L.; Lim, H. P.; Latt, Z. M.; Henning, J.	2020	Gibson 2020	animal	From February 2017 to July 2017	Myanmar	poultry farms	Animal samples	Escherichia coli	Ciprofloxacin	0.049	11	223
Antimicrobials use and resistance on integrated poultry-fish farming systems in the Ayeyarwady Delta of Myanmar	Gibson, J. S.; Wai, H.; Oo, Ssml; Hmwe, E. M. M.; Wai, S. S.; Htun, L. L.; Lim, H. P.; Latt, Z. M.; Henning, J.	2020	Gibson 2020	animal	From February 2017 to July 2017	Myanmar	poultry farms	Other	Escherichia coli	Colistin	0.014	1	72
Antimicrobials use and resistance on integrated poultry-fish farming systems in the Ayeyarwady Delta of Myanmar	Gibson, J. S.; Wai, H.; Oo, Ssml; Hmwe, E. M. M.; Wai, S. S.; Htun, L. L.; Lim, H. P.; Latt, Z. M.; Henning, J.	2020	Gibson 2020	animal	From February 2017 to July 2017	Myanmar	poultry farms	Fecal/Stool Samples	Escherichia coli	Colistin	0.06	11	183
Antimicrobials use and resistance on integrated poultry-fish farming systems in the Ayeyarwady Delta of Myanmar	Gibson, J. S.; Wai, H.; Oo, Ssml; Hmwe, E. M. M.; Wai, S. S.; Htun, L. L.; Lim, H. P.; Latt, Z. M.; Henning, J.	2020	Gibson 2020	animal	From February 2017 to July 2017	Myanmar	poultry farms	Animal samples	Escherichia coli	Colistin	0.063	14	223
Antimicrobials use and resistance on integrated poultry-fish farming systems in the Ayeyarwady Delta of Myanmar	Gibson, J. S.; Wai, H.; Oo, Ssml; Hmwe, E. M. M.; Wai, S. S.; Htun, L. L.; Lim, H. P.; Latt, Z. M.; Henning, J.	2020	Gibson 2020	animal	From February 2017 to July 2017	Myanmar	poultry farms	Animal samples	Escherichia coli	Doxycycline	0.049	11	223
Antimicrobials use and resistance on integrated poultry-fish farming systems in the Ayeyarwady Delta of Myanmar	Gibson, J. S.; Wai, H.; Oo, Ssml; Hmwe, E. M. M.; Wai, S. S.; Htun, L. L.; Lim, H. P.; Latt, Z. M.; Henning, J.	2020	Gibson 2020	animal	From February 2017 to July 2017	Myanmar	poultry farms	Other	Escherichia coli	Enrofoxacin	0.5	36	72
Antimicrobials use and resistance on integrated poultry-fish farming systems in the Ayeyarwady Delta of Myanmar	Gibson, J. S.; Wai, H.; Oo, Ssml; Hmwe, E. M. M.; Wai, S. S.; Htun, L. L.; Lim, H. P.; Latt, Z. M.; Henning, J.	2020	Gibson 2020	animal	From February 2017 to July 2017	Myanmar	poultry farms	Fecal/Stool Samples	Escherichia coli	Enrofoxacin	0.344	63	183
Antimicrobials use and resistance on integrated poultry-fish farming systems in the Ayeyarwady Delta of Myanmar	Gibson, J. S.; Wai, H.; Oo, Ssml; Hmwe, E. M. M.; Wai, S. S.; Htun, L. L.; Lim, H. P.; Latt, Z. M.; Henning, J.	2020	Gibson 2020	animal	From February 2017 to July 2017	Myanmar	poultry farms	Animal samples	Escherichia coli	Enrofoxacin	0.274	61	223
Antimicrobials use and resistance on integrated poultry-fish farming systems in the Ayeyarwady Delta of Myanmar	Gibson, J. S.; Wai, H.; Oo, Ssml; Hmwe, E. M. M.; Wai, S. S.; Htun, L. L.; Lim, H. P.; Latt, Z. M.; Henning, J.	2020	Gibson 2020	animal	From February 2017 to July 2017	Myanmar	poultry farms	Fecal/Stool Samples	Escherichia coli	Gentamicin	0.131	24	183
Antimicrobials use and resistance on integrated poultry-fish farming systems in the Ayeyarwady Delta of Myanmar	Gibson, J. S.; Wai, H.; Oo, Ssml; Hmwe, E. M. M.; Wai, S. S.; Htun, L. L.; Lim, H. P.; Latt, Z. M.; Henning, J.	2020	Gibson 2020	animal	From February 2017 to July 2017	Myanmar	poultry farms	Animal samples	Escherichia coli	Lincomycin	0.031	7	223
Antimicrobials use and resistance on integrated poultry-fish farming systems in the Ayeyarwady Delta of Myanmar	Gibson, J. S.; Wai, H.; Oo, Ssml; Hmwe, E. M. M.; Wai, S. S.; Htun, L. L.; Lim, H. P.; Latt, Z. M.; Henning, J.	2020	Gibson 2020	animal	From February 2017 to July 2017	Myanmar	poultry farms	Fecal/Stool Samples	Escherichia coli	Neomycin	0.066	12	183
Antimicrobials use and resistance on integrated poultry-fish farming systems in the Ayeyarwady Delta of Myanmar	Gibson, J. S.; Wai, H.; Oo, Ssml; Hmwe, E. M. M.; Wai, S. S.; Htun, L. L.; Lim, H. P.; Latt, Z. M.; Henning, J.	2020	Gibson 2020	animal	From February 2017 to July 2017	Myanmar	poultry farms	Animal samples	Escherichia coli	Neomycin	0.022	5	223
Antimicrobials use and resistance on integrated poultry-fish farming systems in the Ayeyarwady Delta of Myanmar	Gibson, J. S.; Wai, H.; Oo, Ssml; Hmwe, E. M. M.; Wai, S. S.; Htun, L. L.; Lim, H. P.; Latt, Z. M.; Henning, J.	2020	Gibson 2020	animal	From February 2017 to July 2017	Myanmar	poultry farms	Other	Escherichia coli	Octamix	0.444	32	72
Antimicrobials use and resistance on integrated poultry-fish farming systems in the Ayeyarwady Delta of Myanmar	Gibson, J. S.; Wai, H.; Oo, Ssml; Hmwe, E. M. M.; Wai, S. S.; Htun, L. L.; Lim, H. P.; Latt, Z. M.; Henning, J.	2020	Gibson 2020	animal	From February 2017 to July 2017	Myanmar	poultry farms	Animal samples	Escherichia coli	Octamix	0.422	94	223
Antimicrobials use and resistance on integrated poultry-fish farming systems in the Ayeyarwady Delta of Myanmar	Gibson, J. S.; Wai, H.; Oo, Ssml; Hmwe, E. M. M.; Wai, S. S.; Htun, L. L.; Lim, H. P.; Latt, Z. M.; Henning, J.	2020	Gibson 2020	animal	From February 2017 to July 2017	Myanmar	poultry farms	Other	Escherichia coli	Ofloxacin	0.042	3	72
Antimicrobials use and resistance on integrated poultry-fish farming systems in the Ayeyarwady Delta of Myanmar	Gibson, J. S.; Wai, H.; Oo, Ssml; Hmwe, E. M. M.; Wai, S. S.; Htun, L. L.; Lim, H. P.; Latt, Z. M.; Henning, J.	2020	Gibson 2020	animal	From February 2017 to July 2017	Myanmar	poultry farms	Animal samples	Escherichia coli	Ofloxacin	0.094	21	223
Antimicrobials use and resistance on integrated poultry-fish farming systems in the Ayeyarwady Delta of Myanmar	Gibson, J. S.; Wai, H.; Oo, Ssml; Hmwe, E. M. M.; Wai, S. S.; Htun, L. L.; Lim, H. P.; Latt, Z. M.; Henning, J.	2020	Gibson 2020	animal	From February 2017 to July 2017	Myanmar	poultry farms	Animal samples	Escherichia coli	Oxytetracycline	0.004	1	223
Antimicrobials use and resistance on integrated poultry-fish farming systems in the Ayeyarwady Delta of Myanmar	Gibson, J. S.; Wai, H.; Oo, Ssml; Hmwe, E. M. M.; Wai, S. S.; Htun, L. L.; Lim, H. P.; Latt, Z. M.; Henning, J.	2020	Gibson 2020	animal	From February 2017 to July 2017	Myanmar	poultry farms	Other	Escherichia coli	Streptomycin	0.042	3	72
Antimicrobials use and resistance on integrated poultry-fish farming systems in the Ayeyarwady Delta of Myanmar	Gibson, J. S.; Wai, H.; Oo, Ssml; Hmwe, E. M. M.; Wai, S. S.; Htun, L. L.; Lim, H. P.; Latt, Z. M.; Henning, J.	2020	Gibson 2020	animal	From February 2017 to July 2017	Myanmar	poultry farms	Animal samples	Escherichia coli	Streptomycin	0.013	3	223
Antimicrobials use and resistance on integrated poultry-fish farming systems in the Ayeyarwady Delta of Myanmar	Gibson, J. S.; Wai, H.; Oo, Ssml; Hmwe, E. M. M.; Wai, S. S.; Htun, L. L.; Lim, H. P.; Latt, Z. M.; Henning, J.	2020	Gibson 2020	animal	From February 2017 to July 2017	Myanmar	poultry farms	Other	Escherichia coli	Sulfadiazine	0.014	1	72
Antimicrobials use and resistance on integrated poultry-fish farming systems in the Ayeyarwady Delta of Myanmar	Gibson, J. S.; Wai, H.; Oo, Ssml; Hmwe, E. M. M.; Wai, S. S.; Htun, L. L.; Lim, H. P.; Latt, Z. M.; Henning, J.	2020	Gibson 2020	animal	From February 2017 to July 2017	Myanmar	poultry farms	Animal samples	Escherichia coli	Sulfadiazine	0.022	5	223
Antimicrobials use and resistance on integrated poultry-fish farming systems in the Ayeyarwady Delta of Myanmar	Gibson, J. S.; Wai, H.; Oo, Ssml; Hmwe, E. M. M.; Wai, S. S.; Htun, L. L.; Lim, H. P.; Latt, Z. M.; Henning, J.	2020	Gibson 2020	animal	From February 2017 to July 2017	Myanmar	poultry farms	Fecal/Stool Samples	Escherichia coli	Sulfamethoxazole/trimethoprim	0.355	65	183
Antimicrobials use and resistance on integrated poultry-fish farming systems in the Ayeyarwady Delta of Myanmar	Gibson, J. S.; Wai, H.; Oo, Ssml; Hmwe, E. M. M.; Wai, S. S.; Htun, L. L.; Lim, H. P.; Latt, Z. M.; Henning, J.	2020	Gibson 2020	animal	From February 2017 to July 2017	Myanmar	poultry farms	Other	Escherichia coli	Sulfamethoxazole/trimethoprim	0.014	1	72
Antimicrobials use and resistance on integrated poultry-fish farming systems in the Ayeyarwady Delta of Myanmar	Gibson, J. S.; Wai, H.; Oo, Ssml; Hmwe, E. M. M.; Wai, S. S.; Htun, L. L.; Lim, H. P.; Latt, Z. M.; Henning, J.	2020	Gibson 2020	animal	From February 2017 to July 2017	Myanmar	poultry farms	Animal samples	Escherichia coli	Sulfamethoxazole/trimethoprim	0.058	13	223
Antimicrobials use and resistance on integrated poultry-fish farming systems in the Ayeyarwady Delta of Myanmar	Gibson, J. S.; Wai, H.; Oo, Ssml; Hmwe, E. M. M.; Wai, S. S.; Htun, L. L.; Lim, H. P.; Latt, Z. M.; Henning, J.	2020	Gibson 2020	animal	From February 2017 to July 2017	Myanmar	poultry farms	Other	Escherichia coli	Tylosin	0.389	28	72
Antimicrobials use and resistance on integrated poultry-fish farming systems in the Ayeyarwady Delta of Myanmar	Gibson, J. S.; Wai, H.; Oo, Ssml; Hmwe, E. M. M.; Wai, S. S.; Htun, L. L.; Lim, H. P.; Latt, Z. M.; Henning, J.	2020	Gibson 2020	animal	From February 2017 to July 2017	Myanmar	poultry farms	Animal samples	Escherichia coli	Tylosin	0.126	28	223
Genomic Characterization of Multidrug-Resistant Salmonella Serovars Derby and Rissen From the Pig Value Chain in Vietnam	Gonz谩lez-Santamarina, B.; Garc铆a-Soto, S.; Dang-Xuan, S.; Abdel-Glil, M. Y.; Meemken, D.; Fries, R.; Tomaso, H.	2021	Gonz谩lez-Santamarina 2021	food	2013	Vietnam	market	Carcass samples	Salmonella spp.	Ampicillin	0.739	17	23
Genomic Characterization of Multidrug-Resistant Salmonella Serovars Derby and Rissen From the Pig Value Chain in Vietnam	Gonz谩lez-Santamarina, B.; Garc铆a-Soto, S.; Dang-Xuan, S.; Abdel-Glil, M. Y.; Meemken, D.; Fries, R.; Tomaso, H.	2021	Gonz谩lez-Santamarina 2021	food	2013	Vietnam	market	Carcass samples	Salmonella spp.	Cefuroxime	0.174	4	23
Genomic Characterization of Multidrug-Resistant Salmonella Serovars Derby and Rissen From the Pig Value Chain in Vietnam	Gonz谩lez-Santamarina, B.; Garc铆a-Soto, S.; Dang-Xuan, S.; Abdel-Glil, M. Y.; Meemken, D.; Fries, R.; Tomaso, H.	2021	Gonz谩lez-Santamarina 2021	food	2013	Vietnam	market	Carcass samples	Salmonella spp.	Ciprofloxacin	0.13	3	23
Genomic Characterization of Multidrug-Resistant Salmonella Serovars Derby and Rissen From the Pig Value Chain in Vietnam	Gonz谩lez-Santamarina, B.; Garc铆a-Soto, S.; Dang-Xuan, S.; Abdel-Glil, M. Y.; Meemken, D.; Fries, R.; Tomaso, H.	2021	Gonz谩lez-Santamarina 2021	food	2013	Vietnam	market	Carcass samples	Salmonella spp.	Colistin	0.043	1	23
Genomic Characterization of Multidrug-Resistant Salmonella Serovars Derby and Rissen From the Pig Value Chain in Vietnam	Gonz谩lez-Santamarina, B.; Garc铆a-Soto, S.; Dang-Xuan, S.; Abdel-Glil, M. Y.; Meemken, D.; Fries, R.; Tomaso, H.	2021	Gonz谩lez-Santamarina 2021	food	2013	Vietnam	market	Carcass samples	Salmonella spp.	Gentamicin	0.174	4	23
Genomic Characterization of Multidrug-Resistant Salmonella Serovars Derby and Rissen From the Pig Value Chain in Vietnam	Gonz谩lez-Santamarina, B.; Garc铆a-Soto, S.; Dang-Xuan, S.; Abdel-Glil, M. Y.; Meemken, D.; Fries, R.; Tomaso, H.	2021	Gonz谩lez-Santamarina 2021	food	2013	Vietnam	market	Carcass samples	Salmonella spp.	Moxifloxacin	0.696	16	23
Genomic Characterization of Multidrug-Resistant Salmonella Serovars Derby and Rissen From the Pig Value Chain in Vietnam	Gonz谩lez-Santamarina, B.; Garc铆a-Soto, S.; Dang-Xuan, S.; Abdel-Glil, M. Y.; Meemken, D.; Fries, R.; Tomaso, H.	2021	Gonz谩lez-Santamarina 2021	food	2013	Vietnam	market	Carcass samples	Salmonella spp.	Piperacillin/Tazobactam	0.696	16	23
Genomic Characterization of Multidrug-Resistant Salmonella Serovars Derby and Rissen From the Pig Value Chain in Vietnam	Gonz谩lez-Santamarina, B.; Garc铆a-Soto, S.; Dang-Xuan, S.; Abdel-Glil, M. Y.; Meemken, D.; Fries, R.; Tomaso, H.	2021	Gonz谩lez-Santamarina 2021	food	2013	Vietnam	market	Carcass samples	Salmonella spp.	Sulfamethoxazole/trimethoprim	0.565	13	23
Genomic Characterization of Multidrug-Resistant Salmonella Serovars Derby and Rissen From the Pig Value Chain in Vietnam	Gonz谩lez-Santamarina, B.; Garc铆a-Soto, S.; Dang-Xuan, S.; Abdel-Glil, M. Y.; Meemken, D.; Fries, R.; Tomaso, H.	2021	Gonz谩lez-Santamarina 2021	food	2013	Vietnam	market	Carcass samples	Salmonella spp.	Tigecycline	0.174	4	23
Genomic Characterization of Multidrug-Resistant Salmonella Serovars Derby and Rissen From the Pig Value Chain in Vietnam	Gonz谩lez-Santamarina, B.; Garc铆a-Soto, S.; Dang-Xuan, S.; Abdel-Glil, M. Y.; Meemken, D.; Fries, R.; Tomaso, H.	2021	Gonz谩lez-Santamarina 2021	food	2013	Vietnam	market	Carcass samples	Salmonella spp.	Tobramycin	0.174	4	23
Genomic Characterization of Multidrug-Resistant Salmonella Serovars Derby and Rissen From the Pig Value Chain in Vietnam	Gonz谩lez-Santamarina, B.; Garc铆a-Soto, S.; Dang-Xuan, S.; Abdel-Glil, M. Y.; Meemken, D.; Fries, R.; Tomaso, H.	2021	Gonz谩lez-Santamarina 2021	food	2013	Vietnam	market	Carcass samples	Salmonella spp.	Trimethoprim	0.565	13	23
Prevalence and genomic analysis of ESBL-producing Escherichia coli in retail raw meats in Singapore	Guo, S.; Aung, K. T.; Leekitcharoenphon, P.; Tay, M. Y. F.; Seow, K. L. G.; Zhong, Y.; Ng, L. C.; Aarestrup, F. M.; Schlundt, J.	2021	Guo 2021	food	June 2017 to October 2018	Singapore	market	Food samples	Escherichia coli	ESBLs	26.9%	58	216
Prevalence and genomic analysis of ESBL-producing Escherichia coli in retail raw meats in Singapore	Guo, S.; Aung, K. T.; Leekitcharoenphon, P.; Tay, M. Y. F.; Seow, K. L. G.; Zhong, Y.; Ng, L. C.; Aarestrup, F. M.; Schlundt, J.	2021	Guo 2021	food	June 2017 to October 2018	Singapore	market	Food samples	Escherichia coli	ESBLs	0.073	15	205
Prevalence and genomic analysis of ESBL-producing Escherichia coli in retail raw meats in Singapore	Guo, S.; Aung, K. T.; Leekitcharoenphon, P.; Tay, M. Y. F.; Seow, K. L. G.; Zhong, Y.; Ng, L. C.; Aarestrup, F. M.; Schlundt, J.	2021	Guo 2021	animal	June 2017 to October 2018	Singapore	market	Food samples	Escherichia coli	ESBLs	51.2%,	109	213
Antibiotic-resistant Escherichia coli isolated from urban rodents in Hanoi, Vietnam	L. E. Huy H; Koizumi, N.; Ung, T. T. H.; Le, T. T.; Nguyen, H. L. K.; Hoang, P. V. M.; Nguyen, C. N.; Khong, T. M.; Hasebe, F.; Haga, T.; Le, M. T. Q.; Hirayama, K.; Miura, K.	2020	L 2020	animal	October 2017, March 2018, and June 2018	Vietnam	community	Fecal/Stool Samples	Escherichia coli	Amoxicillin/clavulanic acid	0.220339	13	59
Antibiotic-resistant Escherichia coli isolated from urban rodents in Hanoi, Vietnam	L. E. Huy H; Koizumi, N.; Ung, T. T. H.; Le, T. T.; Nguyen, H. L. K.; Hoang, P. V. M.; Nguyen, C. N.; Khong, T. M.; Hasebe, F.; Haga, T.; Le, M. T. Q.; Hirayama, K.; Miura, K.	2020	L 2020	animal	October 2017, March 2018, and June 2018	Vietnam	community	Fecal/Stool Samples	Escherichia coli	Ampicillin	0.79661	47	59
Antibiotic-resistant Escherichia coli isolated from urban rodents in Hanoi, Vietnam	L. E. Huy H; Koizumi, N.; Ung, T. T. H.; Le, T. T.; Nguyen, H. L. K.; Hoang, P. V. M.; Nguyen, C. N.; Khong, T. M.; Hasebe, F.; Haga, T.; Le, M. T. Q.; Hirayama, K.; Miura, K.	2020	L 2020	animal	October 2017, March 2018, and June 2018	Vietnam	community	Fecal/Stool Samples	Escherichia coli	Cefotaxime	0.305085	18	59
Antibiotic-resistant Escherichia coli isolated from urban rodents in Hanoi, Vietnam	L. E. Huy H; Koizumi, N.; Ung, T. T. H.; Le, T. T.; Nguyen, H. L. K.; Hoang, P. V. M.; Nguyen, C. N.; Khong, T. M.; Hasebe, F.; Haga, T.; Le, M. T. Q.; Hirayama, K.; Miura, K.	2020	L 2020	animal	October 2017, March 2018, and June 2018	Vietnam	community	Fecal/Stool Samples	Escherichia coli	Ceftazidime	0.237288	14	59
Antibiotic-resistant Escherichia coli isolated from urban rodents in Hanoi, Vietnam	L. E. Huy H; Koizumi, N.; Ung, T. T. H.; Le, T. T.; Nguyen, H. L. K.; Hoang, P. V. M.; Nguyen, C. N.; Khong, T. M.; Hasebe, F.; Haga, T.; Le, M. T. Q.; Hirayama, K.; Miura, K.	2020	L 2020	animal	October 2017, March 2018, and June 2018	Vietnam	community	Fecal/Stool Samples	Escherichia coli	Chloramphenicol	0.457627	27	59
Antibiotic-resistant Escherichia coli isolated from urban rodents in Hanoi, Vietnam	L. E. Huy H; Koizumi, N.; Ung, T. T. H.; Le, T. T.; Nguyen, H. L. K.; Hoang, P. V. M.; Nguyen, C. N.; Khong, T. M.; Hasebe, F.; Haga, T.; Le, M. T. Q.; Hirayama, K.; Miura, K.	2020	L 2020	animal	October 2017, March 2018, and June 2018	Vietnam	community	Fecal/Stool Samples	Escherichia coli	Ciprofloxacin	0.440678	26	59
Antibiotic-resistant Escherichia coli isolated from urban rodents in Hanoi, Vietnam	L. E. Huy H; Koizumi, N.; Ung, T. T. H.; Le, T. T.; Nguyen, H. L. K.; Hoang, P. V. M.; Nguyen, C. N.; Khong, T. M.; Hasebe, F.; Haga, T.; Le, M. T. Q.; Hirayama, K.; Miura, K.	2020	L 2020	animal	October 2017, March 2018, and June 2018	Vietnam	community	Fecal/Stool Samples	Escherichia coli	Gentamicin	0.220339	13	59
Antibiotic-resistant Escherichia coli isolated from urban rodents in Hanoi, Vietnam	L. E. Huy H; Koizumi, N.; Ung, T. T. H.; Le, T. T.; Nguyen, H. L. K.; Hoang, P. V. M.; Nguyen, C. N.; Khong, T. M.; Hasebe, F.; Haga, T.; Le, M. T. Q.; Hirayama, K.; Miura, K.	2020	L 2020	animal	October 2017, March 2018, and June 2018	Vietnam	community	Fecal/Stool Samples	Escherichia coli	Multidrug resistance	0.711864	42	59
Antibiotic-resistant Escherichia coli isolated from urban rodents in Hanoi, Vietnam	L. E. Huy H; Koizumi, N.; Ung, T. T. H.; Le, T. T.; Nguyen, H. L. K.; Hoang, P. V. M.; Nguyen, C. N.; Khong, T. M.; Hasebe, F.; Haga, T.; Le, M. T. Q.; Hirayama, K.; Miura, K.	2020	L 2020	animal	October 2017, March 2018, and June 2018	Vietnam	community	Fecal/Stool Samples	Escherichia coli	Nalidixic acid	0.677966	40	59
Antibiotic-resistant Escherichia coli isolated from urban rodents in Hanoi, Vietnam	L. E. Huy H; Koizumi, N.; Ung, T. T. H.; Le, T. T.; Nguyen, H. L. K.; Hoang, P. V. M.; Nguyen, C. N.; Khong, T. M.; Hasebe, F.; Haga, T.; Le, M. T. Q.; Hirayama, K.; Miura, K.	2020	L 2020	animal	October 2017, March 2018, and June 2018	Vietnam	community	Fecal/Stool Samples	Escherichia coli	Sulfamethoxazole/trimethoprim	0.59322	35	59
Antibiotic-resistant Escherichia coli isolated from urban rodents in Hanoi, Vietnam	L. E. Huy H; Koizumi, N.; Ung, T. T. H.; Le, T. T.; Nguyen, H. L. K.; Hoang, P. V. M.; Nguyen, C. N.; Khong, T. M.; Hasebe, F.; Haga, T.; Le, M. T. Q.; Hirayama, K.; Miura, K.	2020	L 2020	animal	October 2017, March 2018, and June 2018	Vietnam	community	Fecal/Stool Samples	Escherichia coli	Tetracycline	0.779661	46	59
Isolation and detection of antibiotics resistance genes of Escherichia coli from broiler farms in Sukabumi, Indonesia	Hardiati, A.; Safika, S.; Wibawan, I. W. T.; Indrawati, A.; Pasaribu, F. H.	2021	Hardiati 2021	animal	43466	Indonesia	poultry farms	Cloacal samples	Escherichia coli	Ampicillin	1	25	25
Isolation and detection of antibiotics resistance genes of Escherichia coli from broiler farms in Sukabumi, Indonesia	Hardiati, A.; Safika, S.; Wibawan, I. W. T.; Indrawati, A.; Pasaribu, F. H.	2021	Hardiati 2021	animal	43466	Indonesia	poultry farms	Cloacal samples	Escherichia coli	Chloramphenicol	0	0	25
Isolation and detection of antibiotics resistance genes of Escherichia coli from broiler farms in Sukabumi, Indonesia	Hardiati, A.; Safika, S.; Wibawan, I. W. T.; Indrawati, A.; Pasaribu, F. H.	2021	Hardiati 2021	animal	43466	Indonesia	poultry farms	Cloacal samples	Escherichia coli	Ciprofloxacin	0.88	22	25
Isolation and detection of antibiotics resistance genes of Escherichia coli from broiler farms in Sukabumi, Indonesia	Hardiati, A.; Safika, S.; Wibawan, I. W. T.; Indrawati, A.; Pasaribu, F. H.	2021	Hardiati 2021	animal	43466	Indonesia	poultry farms	Cloacal samples	Escherichia coli	Enrofoxacin	0.72	18	25
Isolation and detection of antibiotics resistance genes of Escherichia coli from broiler farms in Sukabumi, Indonesia	Hardiati, A.; Safika, S.; Wibawan, I. W. T.; Indrawati, A.; Pasaribu, F. H.	2021	Hardiati 2021	animal	43466	Indonesia	poultry farms	Cloacal samples	Escherichia coli	Erythromycin	0.92	23	25
Isolation and detection of antibiotics resistance genes of Escherichia coli from broiler farms in Sukabumi, Indonesia	Hardiati, A.; Safika, S.; Wibawan, I. W. T.; Indrawati, A.; Pasaribu, F. H.	2021	Hardiati 2021	animal	43466	Indonesia	poultry farms	Cloacal samples	Escherichia coli	Gentamicin	0.64	16	25
Isolation and detection of antibiotics resistance genes of Escherichia coli from broiler farms in Sukabumi, Indonesia	Hardiati, A.; Safika, S.; Wibawan, I. W. T.; Indrawati, A.; Pasaribu, F. H.	2021	Hardiati 2021	animal	43466	Indonesia	poultry farms	Cloacal samples	Escherichia coli	Nalidixic acid	1	25	25
Isolation and detection of antibiotics resistance genes of Escherichia coli from broiler farms in Sukabumi, Indonesia	Hardiati, A.; Safika, S.; Wibawan, I. W. T.; Indrawati, A.; Pasaribu, F. H.	2021	Hardiati 2021	animal	43466	Indonesia	poultry farms	Cloacal samples	Escherichia coli	Oxytetracycline	0.88	22	25
Isolation and detection of antibiotics resistance genes of Escherichia coli from broiler farms in Sukabumi, Indonesia	Hardiati, A.; Safika, S.; Wibawan, I. W. T.; Indrawati, A.; Pasaribu, F. H.	2021	Hardiati 2021	animal	43466	Indonesia	poultry farms	Cloacal samples	Escherichia coli	Tetracycline	0.88	22	25
Sick pets as potential reservoirs of antibiotic-resistant bacteria in Singapore	Hartantyo, S. H. P.; Chau, M. L.; Fillon, L.; Ariff, Azbm; Kang, J. S. L.; Aung, K. T.; Guti茅rrez, R. A.	2018	Hartantyo 2018	animal	from 2014 to 2016	Singapore	Vet hospital	Animal samples	Escherichia coli	ESBLs	0.4	17	42
Sick pets as potential reservoirs of antibiotic-resistant bacteria in Singapore	Hartantyo, S. H. P.; Chau, M. L.; Fillon, L.; Ariff, Azbm; Kang, J. S. L.; Aung, K. T.; Guti茅rrez, R. A.	2018	Hartantyo 2018	animal	from 2014 to 2016	Singapore	Vet hospital	Animal samples	Klebsiella pneumoniae	ESBLs	0.47	14	30
Sick pets as potential reservoirs of antibiotic-resistant bacteria in Singapore	Hartantyo, S. H. P.; Chau, M. L.; Fillon, L.; Ariff, Azbm; Kang, J. S. L.; Aung, K. T.; Guti茅rrez, R. A.	2018	Hartantyo 2018	animal	from 2014 to 2016	Singapore	Vet hospital	Animal samples	Klebsiella pneumoniae	Imipenem	0.07	2	30
Sick pets as potential reservoirs of antibiotic-resistant bacteria in Singapore	Hartantyo, S. H. P.; Chau, M. L.; Fillon, L.; Ariff, Azbm; Kang, J. S. L.; Aung, K. T.; Guti茅rrez, R. A.	2018	Hartantyo 2018	animal	from 2014 to 2016	Singapore	Vet hospital	Animal samples	Escherichia coli	Multidrug resistance	0.571429	24	42
Sick pets as potential reservoirs of antibiotic-resistant bacteria in Singapore	Hartantyo, S. H. P.; Chau, M. L.; Fillon, L.; Ariff, Azbm; Kang, J. S. L.; Aung, K. T.; Guti茅rrez, R. A.	2018	Hartantyo 2018	animal	from 2014 to 2016	Singapore	Vet hospital	Animal samples	Klebsiella pneumoniae	Multidrug resistance	0.5	15	30
Molecular detection of extended-spectrum 尾-lactamase-producing Klebsiella pneumoniae isolates of chicken origin from East Java, Indonesia	Hayati, M.; Indrawati, A.; Mayasari, Nlpi; Istiyaningsih, I.; Atikah, N.	2019	Hayati 2019	animal	April-May 2017	Indonesia	poultry farms	Cloacal samples	Klebsiella pneumoniae	Amoxicillin	1	11	11
Molecular detection of extended-spectrum 尾-lactamase-producing Klebsiella pneumoniae isolates of chicken origin from East Java, Indonesia	Hayati, M.; Indrawati, A.; Mayasari, Nlpi; Istiyaningsih, I.; Atikah, N.	2019	Hayati 2019	animal	April-May 2017	Indonesia	poultry farms	Cloacal samples	Klebsiella pneumoniae	Ampicillin	1	11	11
Molecular detection of extended-spectrum 尾-lactamase-producing Klebsiella pneumoniae isolates of chicken origin from East Java, Indonesia	Hayati, M.; Indrawati, A.; Mayasari, Nlpi; Istiyaningsih, I.; Atikah, N.	2019	Hayati 2019	animal	April-May 2017	Indonesia	poultry farms	Cloacal samples	Klebsiella pneumoniae	Ciprofloxacin	0.273	3	11
Molecular detection of extended-spectrum 尾-lactamase-producing Klebsiella pneumoniae isolates of chicken origin from East Java, Indonesia	Hayati, M.; Indrawati, A.; Mayasari, Nlpi; Istiyaningsih, I.; Atikah, N.	2019	Hayati 2019	animal	April-May 2017	Indonesia	poultry farms	Cloacal samples	Klebsiella pneumoniae	Colistin	0.091	1	11
Molecular detection of extended-spectrum 尾-lactamase-producing Klebsiella pneumoniae isolates of chicken origin from East Java, Indonesia	Hayati, M.; Indrawati, A.; Mayasari, Nlpi; Istiyaningsih, I.; Atikah, N.	2019	Hayati 2019	animal	April-May 2017	Indonesia	poultry farms	Cloacal samples	Klebsiella pneumoniae	Doxycycline	0.545	6	11
Molecular detection of extended-spectrum 尾-lactamase-producing Klebsiella pneumoniae isolates of chicken origin from East Java, Indonesia	Hayati, M.; Indrawati, A.; Mayasari, Nlpi; Istiyaningsih, I.; Atikah, N.	2019	Hayati 2019	animal	April-May 2017	Indonesia	poultry farms	Cloacal samples	Klebsiella pneumoniae	Enrofoxacin	0.182	2	11
Molecular detection of extended-spectrum 尾-lactamase-producing Klebsiella pneumoniae isolates of chicken origin from East Java, Indonesia	Hayati, M.; Indrawati, A.; Mayasari, Nlpi; Istiyaningsih, I.; Atikah, N.	2019	Hayati 2019	animal	April-May 2017	Indonesia	poultry farms	Cloacal samples	Klebsiella pneumoniae	Gentamicin	0	0	11
Molecular detection of extended-spectrum 尾-lactamase-producing Klebsiella pneumoniae isolates of chicken origin from East Java, Indonesia	Hayati, M.; Indrawati, A.; Mayasari, Nlpi; Istiyaningsih, I.; Atikah, N.	2019	Hayati 2019	animal	April-May 2017	Indonesia	poultry farms	Cloacal samples	Klebsiella pneumoniae	Oxytetracycline	0.909	10	11
Exploring the Antibiotic Resistance Burden in Livestock, Livestock Handlers and Their Non-Livestock Handling Contacts: A One Health Perspective	Hickman, R. A.; Leangapichart, T.; Lunha, K.; Jiwakanon, J.; Angkititrakul, S.; Magnusson, U.; Sunde, M.; J盲rhult, J. D.	2021	Hickman 2021	human	September-December 2018.	Thailand	livestock farms	Other	Escherichia coli	Colistin	30.8%	4	13
Exploring the Antibiotic Resistance Burden in Livestock, Livestock Handlers and Their Non-Livestock Handling Contacts: A One Health Perspective	Hickman, R. A.; Leangapichart, T.; Lunha, K.; Jiwakanon, J.; Angkititrakul, S.; Magnusson, U.; Sunde, M.; J盲rhult, J. D.	2021	Hickman 2021	human	September-December 2018.	Thailand	livestock farms	Other	Escherichia coli	Colistin	13.8%	4	29
Exploring the Antibiotic Resistance Burden in Livestock, Livestock Handlers and Their Non-Livestock Handling Contacts: A One Health Perspective	Hickman, R. A.; Leangapichart, T.; Lunha, K.; Jiwakanon, J.; Angkititrakul, S.; Magnusson, U.; Sunde, M.; J盲rhult, J. D.	2021	Hickman 2021	human	September-December 2018.	Thailand	livestock farms	Other	Escherichia coli	Colistin	26.83%	11	41
Exploring the Antibiotic Resistance Burden in Livestock, Livestock Handlers and Their Non-Livestock Handling Contacts: A One Health Perspective	Hickman, R. A.; Leangapichart, T.; Lunha, K.; Jiwakanon, J.; Angkititrakul, S.; Magnusson, U.; Sunde, M.; J盲rhult, J. D.	2021	Hickman 2021	human	September-December 2018.	Thailand	livestock farms	Other	Escherichia coli	Colistin	0.41	25	61
Exploring the Antibiotic Resistance Burden in Livestock, Livestock Handlers and Their Non-Livestock Handling Contacts: A One Health Perspective	Hickman, R. A.; Leangapichart, T.; Lunha, K.; Jiwakanon, J.; Angkititrakul, S.; Magnusson, U.; Sunde, M.; J盲rhult, J. D.	2021	Hickman 2021	animal	September-December 2018.	Thailand	livestock farms	Animal samples	Escherichia coli	Colistin	0.083	4	48
Exploring the Antibiotic Resistance Burden in Livestock, Livestock Handlers and Their Non-Livestock Handling Contacts: A One Health Perspective	Hickman, R. A.; Leangapichart, T.; Lunha, K.; Jiwakanon, J.; Angkititrakul, S.; Magnusson, U.; Sunde, M.; J盲rhult, J. D.	2021	Hickman 2021	animal	September-December 2018.	Thailand	livestock farms	Animal samples	Escherichia coli	Colistin	0.621	59	95
Exploring the Antibiotic Resistance Burden in Livestock, Livestock Handlers and Their Non-Livestock Handling Contacts: A One Health Perspective	Hickman, R. A.; Leangapichart, T.; Lunha, K.; Jiwakanon, J.; Angkititrakul, S.; Magnusson, U.; Sunde, M.; J盲rhult, J. D.	2021	Hickman 2021	human	September-December 2018.	Thailand	livestock farms	Other	Escherichia coli	ESBLs	96.6%	28	29
Exploring the Antibiotic Resistance Burden in Livestock, Livestock Handlers and Their Non-Livestock Handling Contacts: A One Health Perspective	Hickman, R. A.; Leangapichart, T.; Lunha, K.; Jiwakanon, J.; Angkititrakul, S.; Magnusson, U.; Sunde, M.; J盲rhult, J. D.	2021	Hickman 2021	human	September-December 2018.	Thailand	livestock farms	Other	Escherichia coli	ESBLs	97.6%	40	41
Exploring the Antibiotic Resistance Burden in Livestock, Livestock Handlers and Their Non-Livestock Handling Contacts: A One Health Perspective	Hickman, R. A.; Leangapichart, T.; Lunha, K.; Jiwakanon, J.; Angkititrakul, S.; Magnusson, U.; Sunde, M.; J盲rhult, J. D.	2021	Hickman 2021	human	September-December 2018.	Thailand	livestock farms	Other	Escherichia coli	ESBLs	96.7%	59	61
Exploring the Antibiotic Resistance Burden in Livestock, Livestock Handlers and Their Non-Livestock Handling Contacts: A One Health Perspective	Hickman, R. A.; Leangapichart, T.; Lunha, K.; Jiwakanon, J.; Angkititrakul, S.; Magnusson, U.; Sunde, M.; J盲rhult, J. D.	2021	Hickman 2021	human	September-December 2018.	Thailand	livestock farms	Other	Escherichia coli	ESBLs	1	13	13
Exploring the Antibiotic Resistance Burden in Livestock, Livestock Handlers and Their Non-Livestock Handling Contacts: A One Health Perspective	Hickman, R. A.; Leangapichart, T.; Lunha, K.; Jiwakanon, J.; Angkititrakul, S.; Magnusson, U.; Sunde, M.; J盲rhult, J. D.	2021	Hickman 2021	animal	September-December 2018.	Thailand	livestock farms	Animal samples	Escherichia coli	ESBLs	97.9%	47	48
Exploring the Antibiotic Resistance Burden in Livestock, Livestock Handlers and Their Non-Livestock Handling Contacts: A One Health Perspective	Hickman, R. A.; Leangapichart, T.; Lunha, K.; Jiwakanon, J.; Angkititrakul, S.; Magnusson, U.; Sunde, M.; J盲rhult, J. D.	2021	Hickman 2021	animal	September-December 2018.	Thailand	livestock farms	Animal samples	Escherichia coli	ESBLs	98.9%	94	95
Burden and mortality of sepsis and septic shock at a high-volume, single-center in Vietnam: a retrospective study	Hieu, T. H.; Ngoc Thao, P. T.; Cuc猫, F.; Nam, N. H.; Reda, A.; Hassan, O. G.; Hung, L. T.; Kim Quyen, D. T.; Abdul Aziz, J. M.; Le Quang, L.; Carameros, A. M.; Huy, N. T.	2022	Hieu 2022	human	from April 01, 2019, until June 01, 2019	Vietnam	hospital	Clinical samples	Escherichia coli	Amikacin	0.2222	1.9998	9
Burden and mortality of sepsis and septic shock at a high-volume, single-center in Vietnam: a retrospective study	Hieu, T. H.; Ngoc Thao, P. T.; Cuc猫, F.; Nam, N. H.; Reda, A.; Hassan, O. G.; Hung, L. T.; Kim Quyen, D. T.; Abdul Aziz, J. M.; Le Quang, L.; Carameros, A. M.; Huy, N. T.	2022	Hieu 2022	human	from April 01, 2019, until June 01, 2019	Vietnam	hospital	Clinical samples	Klebsiella spp.	Amikacin	0.538	6.994	13
Burden and mortality of sepsis and septic shock at a high-volume, single-center in Vietnam: a retrospective study	Hieu, T. H.; Ngoc Thao, P. T.; Cuc猫, F.; Nam, N. H.; Reda, A.; Hassan, O. G.; Hung, L. T.; Kim Quyen, D. T.; Abdul Aziz, J. M.; Le Quang, L.; Carameros, A. M.; Huy, N. T.	2022	Hieu 2022	human	from April 01, 2019, until June 01, 2019	Vietnam	hospital	Clinical samples	Escherichia coli	Ceftriaxone	0.7778	7.0002	9
Burden and mortality of sepsis and septic shock at a high-volume, single-center in Vietnam: a retrospective study	Hieu, T. H.; Ngoc Thao, P. T.; Cuc猫, F.; Nam, N. H.; Reda, A.; Hassan, O. G.; Hung, L. T.; Kim Quyen, D. T.; Abdul Aziz, J. M.; Le Quang, L.; Carameros, A. M.; Huy, N. T.	2022	Hieu 2022	human	from April 01, 2019, until June 01, 2019	Vietnam	hospital	Clinical samples	Klebsiella spp.	Ceftriaxone	0.846	10.998	13
Burden and mortality of sepsis and septic shock at a high-volume, single-center in Vietnam: a retrospective study	Hieu, T. H.; Ngoc Thao, P. T.; Cuc猫, F.; Nam, N. H.; Reda, A.; Hassan, O. G.; Hung, L. T.; Kim Quyen, D. T.; Abdul Aziz, J. M.; Le Quang, L.; Carameros, A. M.; Huy, N. T.	2022	Hieu 2022	human	from April 01, 2019, until June 01, 2019	Vietnam	hospital	Clinical samples	Escherichia coli	Ertapenem	0.1111	0.9999	9
Burden and mortality of sepsis and septic shock at a high-volume, single-center in Vietnam: a retrospective study	Hieu, T. H.; Ngoc Thao, P. T.; Cuc猫, F.; Nam, N. H.; Reda, A.; Hassan, O. G.; Hung, L. T.; Kim Quyen, D. T.; Abdul Aziz, J. M.; Le Quang, L.; Carameros, A. M.; Huy, N. T.	2022	Hieu 2022	human	from April 01, 2019, until June 01, 2019	Vietnam	hospital	Clinical samples	Klebsiella spp.	Ertapenem	0.923	11.999	13
Burden and mortality of sepsis and septic shock at a high-volume, single-center in Vietnam: a retrospective study	Hieu, T. H.; Ngoc Thao, P. T.; Cuc猫, F.; Nam, N. H.; Reda, A.; Hassan, O. G.; Hung, L. T.; Kim Quyen, D. T.; Abdul Aziz, J. M.; Le Quang, L.; Carameros, A. M.; Huy, N. T.	2022	Hieu 2022	human	from April 01, 2019, until June 01, 2019	Vietnam	hospital	Clinical samples	Escherichia coli	Gentamicin	0.3333	2.9997	9
Burden and mortality of sepsis and septic shock at a high-volume, single-center in Vietnam: a retrospective study	Hieu, T. H.; Ngoc Thao, P. T.; Cuc猫, F.; Nam, N. H.; Reda, A.; Hassan, O. G.; Hung, L. T.; Kim Quyen, D. T.; Abdul Aziz, J. M.; Le Quang, L.; Carameros, A. M.; Huy, N. T.	2022	Hieu 2022	human	from April 01, 2019, until June 01, 2019	Vietnam	hospital	Clinical samples	Klebsiella spp.	Gentamicin	0.615	7.995	13
Burden and mortality of sepsis and septic shock at a high-volume, single-center in Vietnam: a retrospective study	Hieu, T. H.; Ngoc Thao, P. T.; Cuc猫, F.; Nam, N. H.; Reda, A.; Hassan, O. G.; Hung, L. T.; Kim Quyen, D. T.; Abdul Aziz, J. M.; Le Quang, L.; Carameros, A. M.; Huy, N. T.	2022	Hieu 2022	human	from April 01, 2019, until June 01, 2019	Vietnam	hospital	Clinical samples	Escherichia coli	Imipenem	0.1111	0.9999	9
Burden and mortality of sepsis and septic shock at a high-volume, single-center in Vietnam: a retrospective study	Hieu, T. H.; Ngoc Thao, P. T.; Cuc猫, F.; Nam, N. H.; Reda, A.; Hassan, O. G.; Hung, L. T.; Kim Quyen, D. T.; Abdul Aziz, J. M.; Le Quang, L.; Carameros, A. M.; Huy, N. T.	2022	Hieu 2022	human	from April 01, 2019, until June 01, 2019	Vietnam	hospital	Clinical samples	Klebsiella spp.	Imipenem	0.769	9.997	13
Burden and mortality of sepsis and septic shock at a high-volume, single-center in Vietnam: a retrospective study	Hieu, T. H.; Ngoc Thao, P. T.; Cuc猫, F.; Nam, N. H.; Reda, A.; Hassan, O. G.; Hung, L. T.; Kim Quyen, D. T.; Abdul Aziz, J. M.; Le Quang, L.; Carameros, A. M.; Huy, N. T.	2022	Hieu 2022	human	from April 01, 2019, until June 01, 2019	Vietnam	hospital	Clinical samples	Klebsiella spp.	Meropenem	0.769	9.997	13
Burden and mortality of sepsis and septic shock at a high-volume, single-center in Vietnam: a retrospective study	Hieu, T. H.; Ngoc Thao, P. T.; Cuc猫, F.; Nam, N. H.; Reda, A.; Hassan, O. G.; Hung, L. T.; Kim Quyen, D. T.; Abdul Aziz, J. M.; Le Quang, L.; Carameros, A. M.; Huy, N. T.	2022	Hieu 2022	human	from April 01, 2019, until June 01, 2019	Vietnam	hospital	Clinical samples	Escherichia coli	Piperacillin/Tazobactam	0.2222	1.9998	9
Burden and mortality of sepsis and septic shock at a high-volume, single-center in Vietnam: a retrospective study	Hieu, T. H.; Ngoc Thao, P. T.; Cuc猫, F.; Nam, N. H.; Reda, A.; Hassan, O. G.; Hung, L. T.; Kim Quyen, D. T.; Abdul Aziz, J. M.; Le Quang, L.; Carameros, A. M.; Huy, N. T.	2022	Hieu 2022	human	from April 01, 2019, until June 01, 2019	Vietnam	hospital	Clinical samples	Klebsiella spp.	Piperacillin/Tazobactam	0.846	10.998	13
Burden and mortality of sepsis and septic shock at a high-volume, single-center in Vietnam: a retrospective study	Hieu, T. H.; Ngoc Thao, P. T.; Cuc猫, F.; Nam, N. H.; Reda, A.; Hassan, O. G.; Hung, L. T.; Kim Quyen, D. T.; Abdul Aziz, J. M.; Le Quang, L.; Carameros, A. M.; Huy, N. T.	2022	Hieu 2022	human	from April 01, 2019, until June 01, 2019	Vietnam	hospital	Clinical samples	Escherichia coli	Sulbactam/Cefoperazone	0.4444	3.9996	9
Burden and mortality of sepsis and septic shock at a high-volume, single-center in Vietnam: a retrospective study	Hieu, T. H.; Ngoc Thao, P. T.; Cuc猫, F.; Nam, N. H.; Reda, A.; Hassan, O. G.; Hung, L. T.; Kim Quyen, D. T.; Abdul Aziz, J. M.; Le Quang, L.; Carameros, A. M.; Huy, N. T.	2022	Hieu 2022	human	from April 01, 2019, until June 01, 2019	Vietnam	hospital	Clinical samples	Klebsiella spp.	Sulbactam/Cefoperazone	0.769	9.997	13
Burden and mortality of sepsis and septic shock at a high-volume, single-center in Vietnam: a retrospective study	Hieu, T. H.; Ngoc Thao, P. T.; Cuc猫, F.; Nam, N. H.; Reda, A.; Hassan, O. G.; Hung, L. T.; Kim Quyen, D. T.; Abdul Aziz, J. M.; Le Quang, L.; Carameros, A. M.; Huy, N. T.	2022	Hieu 2022	human	from April 01, 2019, until June 01, 2019	Vietnam	hospital	Clinical samples	Escherichia coli	Sulfamethoxazole/trimethoprim	0.7778	7.0002	9
Burden and mortality of sepsis and septic shock at a high-volume, single-center in Vietnam: a retrospective study	Hieu, T. H.; Ngoc Thao, P. T.; Cuc猫, F.; Nam, N. H.; Reda, A.; Hassan, O. G.; Hung, L. T.; Kim Quyen, D. T.; Abdul Aziz, J. M.; Le Quang, L.; Carameros, A. M.; Huy, N. T.	2022	Hieu 2022	human	from April 01, 2019, until June 01, 2019	Vietnam	hospital	Clinical samples	Klebsiella spp.	Sulfamethoxazole/trimethoprim	0.461	5.993	13
Detection and drug resistance profile of Escherichia coli from subclinical mastitis cows and water supply in dairy farms in Saraburi Province, Thailand	Hinthong, W.; Pumipuntu, N.; Santajit, S.; Kulpeanprasit, S.; Buranasinsup, S.; Sookrung, N.; Chaicumpa, W.; Aiumurai, P.; Indrawattana, N.	2017	Hinthong 2017	environmental	2016	Thailand	poultry farms	Water samples	Escherichia coli	Amoxicillin/clavulanic acid	0.019	1	51
Detection and drug resistance profile of Escherichia coli from subclinical mastitis cows and water supply in dairy farms in Saraburi Province, Thailand	Hinthong, W.; Pumipuntu, N.; Santajit, S.; Kulpeanprasit, S.; Buranasinsup, S.; Sookrung, N.; Chaicumpa, W.; Aiumurai, P.; Indrawattana, N.	2017	Hinthong 2017	environmental	2016	Thailand	poultry farms	Water samples	Escherichia coli	Amoxicillin/clavulanic acid	0.039	2	51
Detection and drug resistance profile of Escherichia coli from subclinical mastitis cows and water supply in dairy farms in Saraburi Province, Thailand	Hinthong, W.; Pumipuntu, N.; Santajit, S.; Kulpeanprasit, S.; Buranasinsup, S.; Sookrung, N.; Chaicumpa, W.; Aiumurai, P.; Indrawattana, N.	2017	Hinthong 2017	environmental	2016	Thailand	poultry farms	Water samples	Escherichia coli	Amoxicillin/clavulanic acid	0.019	1	51
Detection and drug resistance profile of Escherichia coli from subclinical mastitis cows and water supply in dairy farms in Saraburi Province, Thailand	Hinthong, W.; Pumipuntu, N.; Santajit, S.; Kulpeanprasit, S.; Buranasinsup, S.; Sookrung, N.; Chaicumpa, W.; Aiumurai, P.; Indrawattana, N.	2017	Hinthong 2017	food	2016	Thailand	poultry farms	Dairy	Escherichia coli	Ampicillin	0.076	2	26
Detection and drug resistance profile of Escherichia coli from subclinical mastitis cows and water supply in dairy farms in Saraburi Province, Thailand	Hinthong, W.; Pumipuntu, N.; Santajit, S.; Kulpeanprasit, S.; Buranasinsup, S.; Sookrung, N.; Chaicumpa, W.; Aiumurai, P.; Indrawattana, N.	2017	Hinthong 2017	environmental	2016	Thailand	poultry farms	Water samples	Escherichia coli	Ampicillin	0.058	3	51
Detection and drug resistance profile of Escherichia coli from subclinical mastitis cows and water supply in dairy farms in Saraburi Province, Thailand	Hinthong, W.; Pumipuntu, N.; Santajit, S.; Kulpeanprasit, S.; Buranasinsup, S.; Sookrung, N.; Chaicumpa, W.; Aiumurai, P.; Indrawattana, N.	2017	Hinthong 2017	environmental	2016	Thailand	poultry farms	Water samples	Escherichia coli	Gentamicin	0.019	1	51
Detection and drug resistance profile of Escherichia coli from subclinical mastitis cows and water supply in dairy farms in Saraburi Province, Thailand	Hinthong, W.; Pumipuntu, N.; Santajit, S.; Kulpeanprasit, S.; Buranasinsup, S.; Sookrung, N.; Chaicumpa, W.; Aiumurai, P.; Indrawattana, N.	2017	Hinthong 2017	food	2016	Thailand	poultry farms	Dairy	Escherichia coli	Multidrug resistance	0.846154	22	26
Detection and drug resistance profile of Escherichia coli from subclinical mastitis cows and water supply in dairy farms in Saraburi Province, Thailand	Hinthong, W.; Pumipuntu, N.; Santajit, S.; Kulpeanprasit, S.; Buranasinsup, S.; Sookrung, N.; Chaicumpa, W.; Aiumurai, P.; Indrawattana, N.	2017	Hinthong 2017	environmental	2016	Thailand	poultry farms	Water samples	Escherichia coli	Multidrug resistance	0.843137	43	51
Detection and drug resistance profile of Escherichia coli from subclinical mastitis cows and water supply in dairy farms in Saraburi Province, Thailand	Hinthong, W.; Pumipuntu, N.; Santajit, S.; Kulpeanprasit, S.; Buranasinsup, S.; Sookrung, N.; Chaicumpa, W.; Aiumurai, P.; Indrawattana, N.	2017	Hinthong 2017	environmental	2016	Thailand	poultry farms	Water samples	Escherichia coli	Norfloxacin	0.019	1	51
Detection and drug resistance profile of Escherichia coli from subclinical mastitis cows and water supply in dairy farms in Saraburi Province, Thailand	Hinthong, W.; Pumipuntu, N.; Santajit, S.; Kulpeanprasit, S.; Buranasinsup, S.; Sookrung, N.; Chaicumpa, W.; Aiumurai, P.; Indrawattana, N.	2017	Hinthong 2017	food	2016	Thailand	poultry farms	Dairy	Escherichia coli	Norfloxacin	0.038	1	26
Detection and drug resistance profile of Escherichia coli from subclinical mastitis cows and water supply in dairy farms in Saraburi Province, Thailand	Hinthong, W.; Pumipuntu, N.; Santajit, S.; Kulpeanprasit, S.; Buranasinsup, S.; Sookrung, N.; Chaicumpa, W.; Aiumurai, P.; Indrawattana, N.	2017	Hinthong 2017	environmental	2016	Thailand	poultry farms	Water samples	Escherichia coli	piperacillin	0.019	1	51
Detection and drug resistance profile of Escherichia coli from subclinical mastitis cows and water supply in dairy farms in Saraburi Province, Thailand	Hinthong, W.; Pumipuntu, N.; Santajit, S.; Kulpeanprasit, S.; Buranasinsup, S.; Sookrung, N.; Chaicumpa, W.; Aiumurai, P.; Indrawattana, N.	2017	Hinthong 2017	food	2016	Thailand	poultry farms	Dairy	Escherichia coli	Sulfamethoxazole/trimethoprim	0.038	1	26
Detection and drug resistance profile of Escherichia coli from subclinical mastitis cows and water supply in dairy farms in Saraburi Province, Thailand	Hinthong, W.; Pumipuntu, N.; Santajit, S.; Kulpeanprasit, S.; Buranasinsup, S.; Sookrung, N.; Chaicumpa, W.; Aiumurai, P.; Indrawattana, N.	2017	Hinthong 2017	environmental	2016	Thailand	poultry farms	Water samples	Escherichia coli	Sulfamethoxazole/trimethoprim	0.019	1	51
Antimicrobial resistance profiles and molecular characterization of <i>Escherichia coli</i> strains isolated from healthy adults in Ho Chi Minh City, Vietnam	Hoang, P. H.; Awasthi, S. P.; Do Nguyen, P.; Nguyen, N. L. H.; Nguyen, D. T. A.; Le, N. H. L.; Dang, C. V.; Hinenoya, A.; Yamasaki, S.	2017	Hoang 2017	human	March to November 2013.	Vietnam	community	Fecal/Stool Samples	Escherichia coli	Ampicillin	0.650485	67	103
Antimicrobial resistance profiles and molecular characterization of <i>Escherichia coli</i> strains isolated from healthy adults in Ho Chi Minh City, Vietnam	Hoang, P. H.; Awasthi, S. P.; Do Nguyen, P.; Nguyen, N. L. H.; Nguyen, D. T. A.; Le, N. H. L.; Dang, C. V.; Hinenoya, A.; Yamasaki, S.	2017	Hoang 2017	human	March to November 2013.	Vietnam	community	Fecal/Stool Samples	Escherichia coli	Cefotaxime	0.15534	16	103
Antimicrobial resistance profiles and molecular characterization of <i>Escherichia coli</i> strains isolated from healthy adults in Ho Chi Minh City, Vietnam	Hoang, P. H.; Awasthi, S. P.; Do Nguyen, P.; Nguyen, N. L. H.; Nguyen, D. T. A.; Le, N. H. L.; Dang, C. V.; Hinenoya, A.; Yamasaki, S.	2017	Hoang 2017	human	March to November 2013.	Vietnam	community	Fecal/Stool Samples	Escherichia coli	Ceftazidime	0.106796	11	103
Antimicrobial resistance profiles and molecular characterization of <i>Escherichia coli</i> strains isolated from healthy adults in Ho Chi Minh City, Vietnam	Hoang, P. H.; Awasthi, S. P.; Do Nguyen, P.; Nguyen, N. L. H.; Nguyen, D. T. A.; Le, N. H. L.; Dang, C. V.; Hinenoya, A.; Yamasaki, S.	2017	Hoang 2017	human	March to November 2013.	Vietnam	community	Fecal/Stool Samples	Escherichia coli	Chloramphenicol	0.339806	35	103
Antimicrobial resistance profiles and molecular characterization of <i>Escherichia coli</i> strains isolated from healthy adults in Ho Chi Minh City, Vietnam	Hoang, P. H.; Awasthi, S. P.; Do Nguyen, P.; Nguyen, N. L. H.; Nguyen, D. T. A.; Le, N. H. L.; Dang, C. V.; Hinenoya, A.; Yamasaki, S.	2017	Hoang 2017	human	March to November 2013.	Vietnam	community	Fecal/Stool Samples	Escherichia coli	Ciprofloxacin	0.15534	16	103
Antimicrobial resistance profiles and molecular characterization of <i>Escherichia coli</i> strains isolated from healthy adults in Ho Chi Minh City, Vietnam	Hoang, P. H.; Awasthi, S. P.; Do Nguyen, P.; Nguyen, N. L. H.; Nguyen, D. T. A.; Le, N. H. L.; Dang, C. V.; Hinenoya, A.; Yamasaki, S.	2017	Hoang 2017	human	March to November 2013.	Vietnam	community	Fecal/Stool Samples	Escherichia coli	Fosfomycin	0.0485437	5	103
Antimicrobial resistance profiles and molecular characterization of <i>Escherichia coli</i> strains isolated from healthy adults in Ho Chi Minh City, Vietnam	Hoang, P. H.; Awasthi, S. P.; Do Nguyen, P.; Nguyen, N. L. H.; Nguyen, D. T. A.; Le, N. H. L.; Dang, C. V.; Hinenoya, A.; Yamasaki, S.	2017	Hoang 2017	human	March to November 2013.	Vietnam	community	Fecal/Stool Samples	Escherichia coli	Gentamicin	0.0291262	3	103
Antimicrobial resistance profiles and molecular characterization of <i>Escherichia coli</i> strains isolated from healthy adults in Ho Chi Minh City, Vietnam	Hoang, P. H.; Awasthi, S. P.; Do Nguyen, P.; Nguyen, N. L. H.; Nguyen, D. T. A.; Le, N. H. L.; Dang, C. V.; Hinenoya, A.; Yamasaki, S.	2017	Hoang 2017	human	March to November 2013.	Vietnam	community	Fecal/Stool Samples	Escherichia coli	Imipenem	0	0	103
Antimicrobial resistance profiles and molecular characterization of <i>Escherichia coli</i> strains isolated from healthy adults in Ho Chi Minh City, Vietnam	Hoang, P. H.; Awasthi, S. P.; Do Nguyen, P.; Nguyen, N. L. H.; Nguyen, D. T. A.; Le, N. H. L.; Dang, C. V.; Hinenoya, A.; Yamasaki, S.	2017	Hoang 2017	human	March to November 2013.	Vietnam	community	Fecal/Stool Samples	Escherichia coli	Kanamycin	0.126214	13	103
Antimicrobial resistance profiles and molecular characterization of <i>Escherichia coli</i> strains isolated from healthy adults in Ho Chi Minh City, Vietnam	Hoang, P. H.; Awasthi, S. P.; Do Nguyen, P.; Nguyen, N. L. H.; Nguyen, D. T. A.; Le, N. H. L.; Dang, C. V.; Hinenoya, A.; Yamasaki, S.	2017	Hoang 2017	human	March to November 2013.	Vietnam	community	Fecal/Stool Samples	Escherichia coli	Nalidixic acid	0.436893	45	103
Antimicrobial resistance profiles and molecular characterization of <i>Escherichia coli</i> strains isolated from healthy adults in Ho Chi Minh City, Vietnam	Hoang, P. H.; Awasthi, S. P.; Do Nguyen, P.; Nguyen, N. L. H.; Nguyen, D. T. A.; Le, N. H. L.; Dang, C. V.; Hinenoya, A.; Yamasaki, S.	2017	Hoang 2017	human	March to November 2013.	Vietnam	community	Fecal/Stool Samples	Escherichia coli	Streptomycin	0.805825	83	103
Antimicrobial resistance profiles and molecular characterization of <i>Escherichia coli</i> strains isolated from healthy adults in Ho Chi Minh City, Vietnam	Hoang, P. H.; Awasthi, S. P.; Do Nguyen, P.; Nguyen, N. L. H.; Nguyen, D. T. A.; Le, N. H. L.; Dang, C. V.; Hinenoya, A.; Yamasaki, S.	2017	Hoang 2017	human	March to November 2013.	Vietnam	community	Fecal/Stool Samples	Escherichia coli	Sulfamethoxazole/trimethoprim	0.485437	50	103
Antimicrobial resistance profiles and molecular characterization of <i>Escherichia coli</i> strains isolated from healthy adults in Ho Chi Minh City, Vietnam	Hoang, P. H.; Awasthi, S. P.; Do Nguyen, P.; Nguyen, N. L. H.; Nguyen, D. T. A.; Le, N. H. L.; Dang, C. V.; Hinenoya, A.; Yamasaki, S.	2017	Hoang 2017	human	March to November 2013.	Vietnam	community	Fecal/Stool Samples	Escherichia coli	Tetracycline	0.669903	69	103
Antimicrobial resistance in <i>Escherichia coli</i> isolated from brown rats and house shrews in markets, Bogor, Indonesia	Huy, H. L.; Koizumi, N.; Nuradji, H.; Susanti,; Noor, S. M.; Dharmayanti, Nlpi; Haga, T.; Hirayama, K.; Miura, K.	2021	Huy 2021	animal	43739	Indonesia	market	Fecal/Stool Samples	Escherichia coli	Ampicillin	0.75	15	20
Antimicrobial resistance in <i>Escherichia coli</i> isolated from brown rats and house shrews in markets, Bogor, Indonesia	Huy, H. L.; Koizumi, N.; Nuradji, H.; Susanti,; Noor, S. M.; Dharmayanti, Nlpi; Haga, T.; Hirayama, K.; Miura, K.	2021	Huy 2021	animal	43739	Indonesia	market	Fecal/Stool Samples	Escherichia coli	Chloramphenicol	0.1	2	20
Antimicrobial resistance in <i>Escherichia coli</i> isolated from brown rats and house shrews in markets, Bogor, Indonesia	Huy, H. L.; Koizumi, N.; Nuradji, H.; Susanti,; Noor, S. M.; Dharmayanti, Nlpi; Haga, T.; Hirayama, K.; Miura, K.	2021	Huy 2021	animal	43739	Indonesia	market	Fecal/Stool Samples	Escherichia coli	Ciprofloxacin	0.2	4	20
Antimicrobial resistance in <i>Escherichia coli</i> isolated from brown rats and house shrews in markets, Bogor, Indonesia	Huy, H. L.; Koizumi, N.; Nuradji, H.; Susanti,; Noor, S. M.; Dharmayanti, Nlpi; Haga, T.; Hirayama, K.; Miura, K.	2021	Huy 2021	animal	43739	Indonesia	market	Fecal/Stool Samples	Escherichia coli	Gentamicin	0.05	1	20
Antimicrobial resistance in <i>Escherichia coli</i> isolated from brown rats and house shrews in markets, Bogor, Indonesia	Huy, H. L.; Koizumi, N.; Nuradji, H.; Susanti,; Noor, S. M.; Dharmayanti, Nlpi; Haga, T.; Hirayama, K.; Miura, K.	2021	Huy 2021	animal	43739	Indonesia	market	Fecal/Stool Samples	Escherichia coli	Nalidixic acid	0.3	6	20
Antimicrobial resistance in <i>Escherichia coli</i> isolated from brown rats and house shrews in markets, Bogor, Indonesia	Huy, H. L.; Koizumi, N.; Nuradji, H.; Susanti,; Noor, S. M.; Dharmayanti, Nlpi; Haga, T.; Hirayama, K.; Miura, K.	2021	Huy 2021	animal	43739	Indonesia	market	Fecal/Stool Samples	Escherichia coli	Sulfamethoxazole/trimethoprim	0.35	7	20
Antimicrobial resistance in <i>Escherichia coli</i> isolated from brown rats and house shrews in markets, Bogor, Indonesia	Huy, H. L.; Koizumi, N.; Nuradji, H.; Susanti,; Noor, S. M.; Dharmayanti, Nlpi; Haga, T.; Hirayama, K.; Miura, K.	2021	Huy 2021	animal	43739	Indonesia	market	Fecal/Stool Samples	Escherichia coli	Tetracycline	0.4	8	20
Antimicrobial resistance in <i>Escherichia coli</i> isolated from brown rats and house shrews in markets, Bogor, Indonesia	Huy, H. L.; Koizumi, N.; Nuradji, H.; Susanti,; Noor, S. M.; Dharmayanti, Nlpi; Haga, T.; Hirayama, K.; Miura, K.	2021	Huy 2021	animal	43739	Indonesia	market	Fecal/Stool Samples	Escherichia coli	Tetracycline	0.85	17	20
Klebsiella pneumoniae carriage in low-income countries: antimicrobial resistance, genomic diversity and risk factors	Huynh, B. T.; Passet, V.; Rakotondrasoa, A.; Diallo, T.; Kerleguer, A.; Hennart, M.; Lauzanne, A.; Herindrainy, P.; Seck, A.; Bercion, R.; Borand, L.; Pardos de la Gandara, M.; Delarocque-Astagneau, E.; Guillemot, D.; Vray, M.; Garin, B.; Collard, J. M.; Rodrigues, C.; Brisse, S.	2020	Huynh 2020	human	between January 2015 and December 2016	Cambodia	hospital	Fecal/Stool Samples	Klebsiella pneumoniae	Amikacin	0.0206186	2	97
Klebsiella pneumoniae carriage in low-income countries: antimicrobial resistance, genomic diversity and risk factors	Huynh, B. T.; Passet, V.; Rakotondrasoa, A.; Diallo, T.; Kerleguer, A.; Hennart, M.; Lauzanne, A.; Herindrainy, P.; Seck, A.; Bercion, R.; Borand, L.; Pardos de la Gandara, M.; Delarocque-Astagneau, E.; Guillemot, D.; Vray, M.; Garin, B.; Collard, J. M.; Rodrigues, C.; Brisse, S.	2020	Huynh 2020	human	between January 2015 and December 2016	Cambodia	hospital	Fecal/Stool Samples	Klebsiella pneumoniae	Amoxicillin/clavulanic acid	0.14433	14	97
Klebsiella pneumoniae carriage in low-income countries: antimicrobial resistance, genomic diversity and risk factors	Huynh, B. T.; Passet, V.; Rakotondrasoa, A.; Diallo, T.; Kerleguer, A.; Hennart, M.; Lauzanne, A.; Herindrainy, P.; Seck, A.; Bercion, R.; Borand, L.; Pardos de la Gandara, M.; Delarocque-Astagneau, E.; Guillemot, D.; Vray, M.; Garin, B.; Collard, J. M.; Rodrigues, C.; Brisse, S.	2020	Huynh 2020	human	between January 2015 and December 2016	Cambodia	hospital	Fecal/Stool Samples	Klebsiella pneumoniae	Aztreonam	0	0	97
Klebsiella pneumoniae carriage in low-income countries: antimicrobial resistance, genomic diversity and risk factors	Huynh, B. T.; Passet, V.; Rakotondrasoa, A.; Diallo, T.; Kerleguer, A.; Hennart, M.; Lauzanne, A.; Herindrainy, P.; Seck, A.; Bercion, R.; Borand, L.; Pardos de la Gandara, M.; Delarocque-Astagneau, E.; Guillemot, D.; Vray, M.; Garin, B.; Collard, J. M.; Rodrigues, C.; Brisse, S.	2020	Huynh 2020	human	between January 2015 and December 2016	Cambodia	hospital	Fecal/Stool Samples	Klebsiella pneumoniae	Cefepime	0	0	97
Klebsiella pneumoniae carriage in low-income countries: antimicrobial resistance, genomic diversity and risk factors	Huynh, B. T.; Passet, V.; Rakotondrasoa, A.; Diallo, T.; Kerleguer, A.; Hennart, M.; Lauzanne, A.; Herindrainy, P.; Seck, A.; Bercion, R.; Borand, L.; Pardos de la Gandara, M.; Delarocque-Astagneau, E.; Guillemot, D.; Vray, M.; Garin, B.; Collard, J. M.; Rodrigues, C.; Brisse, S.	2020	Huynh 2020	human	between January 2015 and December 2016	Cambodia	hospital	Fecal/Stool Samples	Klebsiella pneumoniae	Cefotaxime	0	0	97
Klebsiella pneumoniae carriage in low-income countries: antimicrobial resistance, genomic diversity and risk factors	Huynh, B. T.; Passet, V.; Rakotondrasoa, A.; Diallo, T.; Kerleguer, A.; Hennart, M.; Lauzanne, A.; Herindrainy, P.; Seck, A.; Bercion, R.; Borand, L.; Pardos de la Gandara, M.; Delarocque-Astagneau, E.; Guillemot, D.; Vray, M.; Garin, B.; Collard, J. M.; Rodrigues, C.; Brisse, S.	2020	Huynh 2020	human	between January 2015 and December 2016	Cambodia	hospital	Fecal/Stool Samples	Klebsiella pneumoniae	Ceftazidime	0.0206186	2	97
Klebsiella pneumoniae carriage in low-income countries: antimicrobial resistance, genomic diversity and risk factors	Huynh, B. T.; Passet, V.; Rakotondrasoa, A.; Diallo, T.; Kerleguer, A.; Hennart, M.; Lauzanne, A.; Herindrainy, P.; Seck, A.; Bercion, R.; Borand, L.; Pardos de la Gandara, M.; Delarocque-Astagneau, E.; Guillemot, D.; Vray, M.; Garin, B.; Collard, J. M.; Rodrigues, C.; Brisse, S.	2020	Huynh 2020	human	between January 2015 and December 2016	Cambodia	hospital	Fecal/Stool Samples	Klebsiella pneumoniae	Ciprofloxacin	0	0	97
Klebsiella pneumoniae carriage in low-income countries: antimicrobial resistance, genomic diversity and risk factors	Huynh, B. T.; Passet, V.; Rakotondrasoa, A.; Diallo, T.; Kerleguer, A.; Hennart, M.; Lauzanne, A.; Herindrainy, P.; Seck, A.; Bercion, R.; Borand, L.; Pardos de la Gandara, M.; Delarocque-Astagneau, E.; Guillemot, D.; Vray, M.; Garin, B.; Collard, J. M.; Rodrigues, C.; Brisse, S.	2020	Huynh 2020	human	between January 2015 and December 2016	Cambodia	hospital	Fecal/Stool Samples	Klebsiella pneumoniae	Gentamicin	0	0	97
Klebsiella pneumoniae carriage in low-income countries: antimicrobial resistance, genomic diversity and risk factors	Huynh, B. T.; Passet, V.; Rakotondrasoa, A.; Diallo, T.; Kerleguer, A.; Hennart, M.; Lauzanne, A.; Herindrainy, P.; Seck, A.; Bercion, R.; Borand, L.; Pardos de la Gandara, M.; Delarocque-Astagneau, E.; Guillemot, D.; Vray, M.; Garin, B.; Collard, J. M.; Rodrigues, C.; Brisse, S.	2020	Huynh 2020	human	between January 2015 and December 2016	Cambodia	hospital	Fecal/Stool Samples	Klebsiella pneumoniae	Imipenem	0.0103093	1	97
Klebsiella pneumoniae carriage in low-income countries: antimicrobial resistance, genomic diversity and risk factors	Huynh, B. T.; Passet, V.; Rakotondrasoa, A.; Diallo, T.; Kerleguer, A.; Hennart, M.; Lauzanne, A.; Herindrainy, P.; Seck, A.; Bercion, R.; Borand, L.; Pardos de la Gandara, M.; Delarocque-Astagneau, E.; Guillemot, D.; Vray, M.; Garin, B.; Collard, J. M.; Rodrigues, C.; Brisse, S.	2020	Huynh 2020	human	between January 2015 and December 2016	Cambodia	hospital	Fecal/Stool Samples	Klebsiella pneumoniae	Nalidixic acid	0	0	97
Klebsiella pneumoniae carriage in low-income countries: antimicrobial resistance, genomic diversity and risk factors	Huynh, B. T.; Passet, V.; Rakotondrasoa, A.; Diallo, T.; Kerleguer, A.; Hennart, M.; Lauzanne, A.; Herindrainy, P.; Seck, A.; Bercion, R.; Borand, L.; Pardos de la Gandara, M.; Delarocque-Astagneau, E.; Guillemot, D.; Vray, M.; Garin, B.; Collard, J. M.; Rodrigues, C.; Brisse, S.	2020	Huynh 2020	human	between January 2015 and December 2016	Cambodia	hospital	Fecal/Stool Samples	Klebsiella pneumoniae	Piperacillin/Tazobactam	0.0309278	3	97
Klebsiella pneumoniae carriage in low-income countries: antimicrobial resistance, genomic diversity and risk factors	Huynh, B. T.; Passet, V.; Rakotondrasoa, A.; Diallo, T.; Kerleguer, A.; Hennart, M.; Lauzanne, A.; Herindrainy, P.; Seck, A.; Bercion, R.; Borand, L.; Pardos de la Gandara, M.; Delarocque-Astagneau, E.; Guillemot, D.; Vray, M.; Garin, B.; Collard, J. M.; Rodrigues, C.; Brisse, S.	2020	Huynh 2020	human	between January 2015 and December 2016	Cambodia	hospital	Fecal/Stool Samples	Klebsiella pneumoniae	Sulfamethoxazole/trimethoprim	0.0412371	4	97
Klebsiella pneumoniae carriage in low-income countries: antimicrobial resistance, genomic diversity and risk factors	Huynh, B. T.; Passet, V.; Rakotondrasoa, A.; Diallo, T.; Kerleguer, A.; Hennart, M.; Lauzanne, A.; Herindrainy, P.; Seck, A.; Bercion, R.; Borand, L.; Pardos de la Gandara, M.; Delarocque-Astagneau, E.; Guillemot, D.; Vray, M.; Garin, B.; Collard, J. M.; Rodrigues, C.; Brisse, S.	2020	Huynh 2020	human	between January 2015 and December 2016	Cambodia	hospital	Fecal/Stool Samples	Klebsiella pneumoniae	Tetracycline	0.14433	14	97
Klebsiella pneumoniae carriage in low-income countries: antimicrobial resistance, genomic diversity and risk factors	Huynh, B. T.; Passet, V.; Rakotondrasoa, A.; Diallo, T.; Kerleguer, A.; Hennart, M.; Lauzanne, A.; Herindrainy, P.; Seck, A.; Bercion, R.; Borand, L.; Pardos de la Gandara, M.; Delarocque-Astagneau, E.; Guillemot, D.; Vray, M.; Garin, B.; Collard, J. M.; Rodrigues, C.; Brisse, S.	2020	Huynh 2020	human	between January 2015 and December 2016	Cambodia	hospital	Fecal/Stool Samples	Klebsiella pneumoniae	Ticarcillin/clavulanic acid	0.185567	18	97
Klebsiella pneumoniae carriage in low-income countries: antimicrobial resistance, genomic diversity and risk factors	Huynh, B. T.; Passet, V.; Rakotondrasoa, A.; Diallo, T.; Kerleguer, A.; Hennart, M.; Lauzanne, A.; Herindrainy, P.; Seck, A.; Bercion, R.; Borand, L.; Pardos de la Gandara, M.; Delarocque-Astagneau, E.; Guillemot, D.; Vray, M.; Garin, B.; Collard, J. M.; Rodrigues, C.; Brisse, S.	2020	Huynh 2020	human	between January 2015 and December 2016	Cambodia	hospital	Fecal/Stool Samples	Klebsiella pneumoniae	Tobramycin	0.0103093	1	97
Antimicrobial Resistance Surveillance of Pigs and Chickens in the Lao People's Democratic Republic, 2018-2021	Inthavong, P.; Chanthavong, S.; Nammanininh, P.; Phommachanh, P.; Theppangna, W.; Agunos, A.; Wagenaar, J. A.; Douangngeun, B.; Loth, L.	2022	Inthavong 2022	animal	2018-2021	Lao PDR	market	Fecal/Stool Samples	Escherichia coli	Ampicillin	0.706209	783.892	1110
Antimicrobial Resistance Surveillance of Pigs and Chickens in the Lao People's Democratic Republic, 2018-2021	Inthavong, P.; Chanthavong, S.; Nammanininh, P.; Phommachanh, P.; Theppangna, W.; Agunos, A.; Wagenaar, J. A.; Douangngeun, B.; Loth, L.	2022	Inthavong 2022	animal	2018-2021	Lao PDR	market	Fecal/Stool Samples	Escherichia coli	Ampicillin	0.869763	655.801	754
Antimicrobial Resistance Surveillance of Pigs and Chickens in the Lao People's Democratic Republic, 2018-2021	Inthavong, P.; Chanthavong, S.; Nammanininh, P.; Phommachanh, P.; Theppangna, W.; Agunos, A.; Wagenaar, J. A.; Douangngeun, B.; Loth, L.	2022	Inthavong 2022	animal	2018-2021	Lao PDR	market	Fecal/Stool Samples	Salmonella spp.	Ampicillin	0.236593	165.142	698
Antimicrobial Resistance Surveillance of Pigs and Chickens in the Lao People's Democratic Republic, 2018-2021	Inthavong, P.; Chanthavong, S.; Nammanininh, P.; Phommachanh, P.; Theppangna, W.; Agunos, A.; Wagenaar, J. A.; Douangngeun, B.; Loth, L.	2022	Inthavong 2022	animal	2018-2021	Lao PDR	market	Fecal/Stool Samples	Salmonella spp.	Ampicillin	0.769716	518.019	673
Antimicrobial Resistance Surveillance of Pigs and Chickens in the Lao People's Democratic Republic, 2018-2021	Inthavong, P.; Chanthavong, S.; Nammanininh, P.; Phommachanh, P.; Theppangna, W.; Agunos, A.; Wagenaar, J. A.; Douangngeun, B.; Loth, L.	2022	Inthavong 2022	animal	2018-2021	Lao PDR	market	Fecal/Stool Samples	Escherichia coli	Azithromycin	0.091368	101.418	1110
Antimicrobial Resistance Surveillance of Pigs and Chickens in the Lao People's Democratic Republic, 2018-2021	Inthavong, P.; Chanthavong, S.; Nammanininh, P.; Phommachanh, P.; Theppangna, W.; Agunos, A.; Wagenaar, J. A.; Douangngeun, B.; Loth, L.	2022	Inthavong 2022	animal	2018-2021	Lao PDR	market	Fecal/Stool Samples	Escherichia coli	Azithromycin	0.1368	103.147	754
Antimicrobial Resistance Surveillance of Pigs and Chickens in the Lao People's Democratic Republic, 2018-2021	Inthavong, P.; Chanthavong, S.; Nammanininh, P.; Phommachanh, P.; Theppangna, W.; Agunos, A.; Wagenaar, J. A.; Douangngeun, B.; Loth, L.	2022	Inthavong 2022	animal	2018-2021	Lao PDR	market	Fecal/Stool Samples	Salmonella spp.	Azithromycin	0.0252366	17.6151	698
Antimicrobial Resistance Surveillance of Pigs and Chickens in the Lao People's Democratic Republic, 2018-2021	Inthavong, P.; Chanthavong, S.; Nammanininh, P.; Phommachanh, P.; Theppangna, W.; Agunos, A.; Wagenaar, J. A.; Douangngeun, B.; Loth, L.	2022	Inthavong 2022	animal	2018-2021	Lao PDR	market	Fecal/Stool Samples	Salmonella spp.	Azithromycin	0.0883281	59.4448	673
Antimicrobial Resistance Surveillance of Pigs and Chickens in the Lao People's Democratic Republic, 2018-2021	Inthavong, P.; Chanthavong, S.; Nammanininh, P.; Phommachanh, P.; Theppangna, W.; Agunos, A.; Wagenaar, J. A.; Douangngeun, B.; Loth, L.	2022	Inthavong 2022	animal	2018-2021	Lao PDR	market	Fecal/Stool Samples	Escherichia coli	Cefotaxime	0.0307925	34.1797	1110
Antimicrobial Resistance Surveillance of Pigs and Chickens in the Lao People's Democratic Republic, 2018-2021	Inthavong, P.; Chanthavong, S.; Nammanininh, P.; Phommachanh, P.; Theppangna, W.; Agunos, A.; Wagenaar, J. A.; Douangngeun, B.; Loth, L.	2022	Inthavong 2022	animal	2018-2021	Lao PDR	market	Fecal/Stool Samples	Escherichia coli	Cefotaxime	0.145886	109.998	754
Antimicrobial Resistance Surveillance of Pigs and Chickens in the Lao People's Democratic Republic, 2018-2021	Inthavong, P.; Chanthavong, S.; Nammanininh, P.; Phommachanh, P.; Theppangna, W.; Agunos, A.; Wagenaar, J. A.; Douangngeun, B.; Loth, L.	2022	Inthavong 2022	animal	2018-2021	Lao PDR	market	Fecal/Stool Samples	Salmonella spp.	Cefotaxime	0.0189274	13.2114	698
Antimicrobial Resistance Surveillance of Pigs and Chickens in the Lao People's Democratic Republic, 2018-2021	Inthavong, P.; Chanthavong, S.; Nammanininh, P.; Phommachanh, P.; Theppangna, W.; Agunos, A.; Wagenaar, J. A.; Douangngeun, B.; Loth, L.	2022	Inthavong 2022	animal	2018-2021	Lao PDR	market	Fecal/Stool Samples	Salmonella spp.	Cefotaxime	0.113565	76.429	673
Antimicrobial Resistance Surveillance of Pigs and Chickens in the Lao People's Democratic Republic, 2018-2021	Inthavong, P.; Chanthavong, S.; Nammanininh, P.; Phommachanh, P.; Theppangna, W.; Agunos, A.; Wagenaar, J. A.; Douangngeun, B.; Loth, L.	2022	Inthavong 2022	animal	2018-2021	Lao PDR	market	Fecal/Stool Samples	Escherichia coli	Chloramphenicol	0.336699	373.735	1110
Antimicrobial Resistance Surveillance of Pigs and Chickens in the Lao People's Democratic Republic, 2018-2021	Inthavong, P.; Chanthavong, S.; Nammanininh, P.; Phommachanh, P.; Theppangna, W.; Agunos, A.; Wagenaar, J. A.; Douangngeun, B.; Loth, L.	2022	Inthavong 2022	animal	2018-2021	Lao PDR	market	Fecal/Stool Samples	Escherichia coli	Chloramphenicol	0.633518	477.673	754
Antimicrobial Resistance Surveillance of Pigs and Chickens in the Lao People's Democratic Republic, 2018-2021	Inthavong, P.; Chanthavong, S.; Nammanininh, P.; Phommachanh, P.; Theppangna, W.; Agunos, A.; Wagenaar, J. A.; Douangngeun, B.; Loth, L.	2022	Inthavong 2022	animal	2018-2021	Lao PDR	market	Fecal/Stool Samples	Salmonella spp.	Chloramphenicol	0.132492	92.4795	698
Antimicrobial Resistance Surveillance of Pigs and Chickens in the Lao People's Democratic Republic, 2018-2021	Inthavong, P.; Chanthavong, S.; Nammanininh, P.; Phommachanh, P.; Theppangna, W.; Agunos, A.; Wagenaar, J. A.; Douangngeun, B.; Loth, L.	2022	Inthavong 2022	animal	2018-2021	Lao PDR	market	Fecal/Stool Samples	Salmonella spp.	Chloramphenicol	0.384858	259.009	673
Antimicrobial Resistance Surveillance of Pigs and Chickens in the Lao People's Democratic Republic, 2018-2021	Inthavong, P.; Chanthavong, S.; Nammanininh, P.; Phommachanh, P.; Theppangna, W.; Agunos, A.; Wagenaar, J. A.; Douangngeun, B.; Loth, L.	2022	Inthavong 2022	animal	2018-2021	Lao PDR	market	Fecal/Stool Samples	Escherichia coli	Ciprofloxacin	0.179202	198.915	1110
Antimicrobial Resistance Surveillance of Pigs and Chickens in the Lao People's Democratic Republic, 2018-2021	Inthavong, P.; Chanthavong, S.; Nammanininh, P.; Phommachanh, P.; Theppangna, W.; Agunos, A.; Wagenaar, J. A.; Douangngeun, B.; Loth, L.	2022	Inthavong 2022	animal	2018-2021	Lao PDR	market	Fecal/Stool Samples	Escherichia coli	Ciprofloxacin	0.215548	162.523	754
Antimicrobial Resistance Surveillance of Pigs and Chickens in the Lao People's Democratic Republic, 2018-2021	Inthavong, P.; Chanthavong, S.; Nammanininh, P.; Phommachanh, P.; Theppangna, W.; Agunos, A.; Wagenaar, J. A.; Douangngeun, B.; Loth, L.	2022	Inthavong 2022	animal	2018-2021	Lao PDR	market	Fecal/Stool Samples	Salmonella spp.	Ciprofloxacin	0.671924	469.003	698
Antimicrobial Resistance Surveillance of Pigs and Chickens in the Lao People's Democratic Republic, 2018-2021	Inthavong, P.; Chanthavong, S.; Nammanininh, P.; Phommachanh, P.; Theppangna, W.; Agunos, A.; Wagenaar, J. A.; Douangngeun, B.; Loth, L.	2022	Inthavong 2022	animal	2018-2021	Lao PDR	market	Fecal/Stool Samples	Salmonella spp.	Ciprofloxacin	0.359621	242.025	673
Antimicrobial Resistance Surveillance of Pigs and Chickens in the Lao People's Democratic Republic, 2018-2021	Inthavong, P.; Chanthavong, S.; Nammanininh, P.; Phommachanh, P.; Theppangna, W.; Agunos, A.; Wagenaar, J. A.; Douangngeun, B.; Loth, L.	2022	Inthavong 2022	animal	2018-2021	Lao PDR	market	Fecal/Stool Samples	Escherichia coli	Colistin	0.0792529	87.9707	1110
Antimicrobial Resistance Surveillance of Pigs and Chickens in the Lao People's Democratic Republic, 2018-2021	Inthavong, P.; Chanthavong, S.; Nammanininh, P.; Phommachanh, P.; Theppangna, W.; Agunos, A.; Wagenaar, J. A.; Douangngeun, B.; Loth, L.	2022	Inthavong 2022	animal	2018-2021	Lao PDR	market	Fecal/Stool Samples	Escherichia coli	Colistin	0.18526	139.686	754
Antimicrobial Resistance Surveillance of Pigs and Chickens in the Lao People's Democratic Republic, 2018-2021	Inthavong, P.; Chanthavong, S.; Nammanininh, P.; Phommachanh, P.; Theppangna, W.; Agunos, A.; Wagenaar, J. A.; Douangngeun, B.; Loth, L.	2022	Inthavong 2022	animal	2018-2021	Lao PDR	market	Fecal/Stool Samples	Salmonella spp.	Colistin	0.0820189	57.2492	698
Antimicrobial Resistance Surveillance of Pigs and Chickens in the Lao People's Democratic Republic, 2018-2021	Inthavong, P.; Chanthavong, S.; Nammanininh, P.; Phommachanh, P.; Theppangna, W.; Agunos, A.; Wagenaar, J. A.; Douangngeun, B.; Loth, L.	2022	Inthavong 2022	animal	2018-2021	Lao PDR	market	Fecal/Stool Samples	Salmonella spp.	Colistin	0.18612	125.259	673
Antimicrobial Resistance Surveillance of Pigs and Chickens in the Lao People's Democratic Republic, 2018-2021	Inthavong, P.; Chanthavong, S.; Nammanininh, P.; Phommachanh, P.; Theppangna, W.; Agunos, A.; Wagenaar, J. A.; Douangngeun, B.; Loth, L.	2022	Inthavong 2022	animal	2018-2021	Lao PDR	market	Fecal/Stool Samples	Escherichia coli	Gentamicin	0.0519939	57.7133	1110
Antimicrobial Resistance Surveillance of Pigs and Chickens in the Lao People's Democratic Republic, 2018-2021	Inthavong, P.; Chanthavong, S.; Nammanininh, P.; Phommachanh, P.; Theppangna, W.; Agunos, A.; Wagenaar, J. A.; Douangngeun, B.; Loth, L.	2022	Inthavong 2022	animal	2018-2021	Lao PDR	market	Fecal/Stool Samples	Escherichia coli	Gentamicin	0.182231	137.402	754
Antimicrobial Resistance Surveillance of Pigs and Chickens in the Lao People's Democratic Republic, 2018-2021	Inthavong, P.; Chanthavong, S.; Nammanininh, P.; Phommachanh, P.; Theppangna, W.; Agunos, A.; Wagenaar, J. A.; Douangngeun, B.; Loth, L.	2022	Inthavong 2022	animal	2018-2021	Lao PDR	market	Fecal/Stool Samples	Salmonella spp.	Gentamicin	0.022082	15.4132	698
Antimicrobial Resistance Surveillance of Pigs and Chickens in the Lao People's Democratic Republic, 2018-2021	Inthavong, P.; Chanthavong, S.; Nammanininh, P.; Phommachanh, P.; Theppangna, W.; Agunos, A.; Wagenaar, J. A.; Douangngeun, B.; Loth, L.	2022	Inthavong 2022	animal	2018-2021	Lao PDR	market	Fecal/Stool Samples	Salmonella spp.	Gentamicin	0.100946	67.9369	673
Antimicrobial Resistance Surveillance of Pigs and Chickens in the Lao People's Democratic Republic, 2018-2021	Inthavong, P.; Chanthavong, S.; Nammanininh, P.; Phommachanh, P.; Theppangna, W.; Agunos, A.; Wagenaar, J. A.; Douangngeun, B.; Loth, L.	2022	Inthavong 2022	animal	2018-2021	Lao PDR	market	Fecal/Stool Samples	Escherichia coli	Meropenem	0.00656234	4.94801	754
Antimicrobial Resistance Surveillance of Pigs and Chickens in the Lao People's Democratic Republic, 2018-2021	Inthavong, P.; Chanthavong, S.; Nammanininh, P.; Phommachanh, P.; Theppangna, W.; Agunos, A.; Wagenaar, J. A.; Douangngeun, B.; Loth, L.	2022	Inthavong 2022	animal	2018-2021	Lao PDR	market	Fecal/Stool Samples	Escherichia coli	Nalidixic acid	0.218576	242.62	1110
Antimicrobial Resistance Surveillance of Pigs and Chickens in the Lao People's Democratic Republic, 2018-2021	Inthavong, P.; Chanthavong, S.; Nammanininh, P.; Phommachanh, P.; Theppangna, W.; Agunos, A.; Wagenaar, J. A.; Douangngeun, B.; Loth, L.	2022	Inthavong 2022	animal	2018-2021	Lao PDR	market	Fecal/Stool Samples	Escherichia coli	Nalidixic acid	0.270066	203.629	754
Antimicrobial Resistance Surveillance of Pigs and Chickens in the Lao People's Democratic Republic, 2018-2021	Inthavong, P.; Chanthavong, S.; Nammanininh, P.; Phommachanh, P.; Theppangna, W.; Agunos, A.; Wagenaar, J. A.; Douangngeun, B.; Loth, L.	2022	Inthavong 2022	animal	2018-2021	Lao PDR	market	Fecal/Stool Samples	Salmonella spp.	Nalidixic acid	0.195584	136.517	698
Antimicrobial Resistance Surveillance of Pigs and Chickens in the Lao People's Democratic Republic, 2018-2021	Inthavong, P.; Chanthavong, S.; Nammanininh, P.; Phommachanh, P.; Theppangna, W.; Agunos, A.; Wagenaar, J. A.; Douangngeun, B.; Loth, L.	2022	Inthavong 2022	animal	2018-2021	Lao PDR	market	Fecal/Stool Samples	Salmonella spp.	Nalidixic acid	0.100946	67.9369	673
Antimicrobial Resistance Surveillance of Pigs and Chickens in the Lao People's Democratic Republic, 2018-2021	Inthavong, P.; Chanthavong, S.; Nammanininh, P.; Phommachanh, P.; Theppangna, W.; Agunos, A.; Wagenaar, J. A.; Douangngeun, B.; Loth, L.	2022	Inthavong 2022	animal	2018-2021	Lao PDR	market	Fecal/Stool Samples	Escherichia coli	Sulfamethoxazole	0.657749	730.101	1110
Antimicrobial Resistance Surveillance of Pigs and Chickens in the Lao People's Democratic Republic, 2018-2021	Inthavong, P.; Chanthavong, S.; Nammanininh, P.; Phommachanh, P.; Theppangna, W.; Agunos, A.; Wagenaar, J. A.; Douangngeun, B.; Loth, L.	2022	Inthavong 2022	animal	2018-2021	Lao PDR	market	Fecal/Stool Samples	Escherichia coli	Sulfamethoxazole	0.897022	676.354	754
Antimicrobial Resistance Surveillance of Pigs and Chickens in the Lao People's Democratic Republic, 2018-2021	Inthavong, P.; Chanthavong, S.; Nammanininh, P.; Phommachanh, P.; Theppangna, W.; Agunos, A.; Wagenaar, J. A.; Douangngeun, B.; Loth, L.	2022	Inthavong 2022	animal	2018-2021	Lao PDR	market	Fecal/Stool Samples	Salmonella spp.	Sulfamethoxazole	0.26183	182.757	698
Antimicrobial Resistance Surveillance of Pigs and Chickens in the Lao People's Democratic Republic, 2018-2021	Inthavong, P.; Chanthavong, S.; Nammanininh, P.; Phommachanh, P.; Theppangna, W.; Agunos, A.; Wagenaar, J. A.; Douangngeun, B.; Loth, L.	2022	Inthavong 2022	animal	2018-2021	Lao PDR	market	Fecal/Stool Samples	Salmonella spp.	Sulfamethoxazole	0.826498	556.233	673
Antimicrobial Resistance Surveillance of Pigs and Chickens in the Lao People's Democratic Republic, 2018-2021	Inthavong, P.; Chanthavong, S.; Nammanininh, P.; Phommachanh, P.; Theppangna, W.; Agunos, A.; Wagenaar, J. A.; Douangngeun, B.; Loth, L.	2022	Inthavong 2022	animal	2018-2021	Lao PDR	market	Fecal/Stool Samples	Escherichia coli	Tetracycline	0.754669	837.683	1110
Antimicrobial Resistance Surveillance of Pigs and Chickens in the Lao People's Democratic Republic, 2018-2021	Inthavong, P.; Chanthavong, S.; Nammanininh, P.; Phommachanh, P.; Theppangna, W.; Agunos, A.; Wagenaar, J. A.; Douangngeun, B.; Loth, L.	2022	Inthavong 2022	animal	2018-2021	Lao PDR	market	Fecal/Stool Samples	Escherichia coli	Tetracycline	0.924281	696.908	754
Antimicrobial Resistance Surveillance of Pigs and Chickens in the Lao People's Democratic Republic, 2018-2021	Inthavong, P.; Chanthavong, S.; Nammanininh, P.; Phommachanh, P.; Theppangna, W.; Agunos, A.; Wagenaar, J. A.; Douangngeun, B.; Loth, L.	2022	Inthavong 2022	animal	2018-2021	Lao PDR	market	Fecal/Stool Samples	Salmonella spp.	Tetracycline	0.457413	319.274	698
Antimicrobial Resistance Surveillance of Pigs and Chickens in the Lao People's Democratic Republic, 2018-2021	Inthavong, P.; Chanthavong, S.; Nammanininh, P.; Phommachanh, P.; Theppangna, W.; Agunos, A.; Wagenaar, J. A.; Douangngeun, B.; Loth, L.	2022	Inthavong 2022	animal	2018-2021	Lao PDR	market	Fecal/Stool Samples	Salmonella spp.	Tetracycline	0.839117	564.726	673
Antimicrobial Resistance Surveillance of Pigs and Chickens in the Lao People's Democratic Republic, 2018-2021	Inthavong, P.; Chanthavong, S.; Nammanininh, P.; Phommachanh, P.; Theppangna, W.; Agunos, A.; Wagenaar, J. A.; Douangngeun, B.; Loth, L.	2022	Inthavong 2022	animal	2018-2021	Lao PDR	market	Fecal/Stool Samples	Escherichia coli	Tigecycline	0.064109	71.161	1110
Antimicrobial Resistance Surveillance of Pigs and Chickens in the Lao People's Democratic Republic, 2018-2021	Inthavong, P.; Chanthavong, S.; Nammanininh, P.; Phommachanh, P.; Theppangna, W.; Agunos, A.; Wagenaar, J. A.; Douangngeun, B.; Loth, L.	2022	Inthavong 2022	animal	2018-2021	Lao PDR	market	Fecal/Stool Samples	Escherichia coli	Tigecycline	0.118627	89.4447	754
Antimicrobial Resistance Surveillance of Pigs and Chickens in the Lao People's Democratic Republic, 2018-2021	Inthavong, P.; Chanthavong, S.; Nammanininh, P.; Phommachanh, P.; Theppangna, W.; Agunos, A.; Wagenaar, J. A.; Douangngeun, B.; Loth, L.	2022	Inthavong 2022	animal	2018-2021	Lao PDR	market	Fecal/Stool Samples	Salmonella spp.	Tigecycline	0.154574	107.893	698
Antimicrobial Resistance Surveillance of Pigs and Chickens in the Lao People's Democratic Republic, 2018-2021	Inthavong, P.; Chanthavong, S.; Nammanininh, P.; Phommachanh, P.; Theppangna, W.; Agunos, A.; Wagenaar, J. A.; Douangngeun, B.; Loth, L.	2022	Inthavong 2022	animal	2018-2021	Lao PDR	market	Fecal/Stool Samples	Salmonella spp.	Tigecycline	0.26183	176.211	673
Antimicrobial Resistance Surveillance of Pigs and Chickens in the Lao People's Democratic Republic, 2018-2021	Inthavong, P.; Chanthavong, S.; Nammanininh, P.; Phommachanh, P.; Theppangna, W.; Agunos, A.; Wagenaar, J. A.; Douangngeun, B.; Loth, L.	2022	Inthavong 2022	animal	2018-2021	Lao PDR	market	Fecal/Stool Samples	Escherichia coli	Trimethoprim	0.394245	437.612	1110
Antimicrobial Resistance Surveillance of Pigs and Chickens in the Lao People's Democratic Republic, 2018-2021	Inthavong, P.; Chanthavong, S.; Nammanininh, P.; Phommachanh, P.; Theppangna, W.; Agunos, A.; Wagenaar, J. A.; Douangngeun, B.; Loth, L.	2022	Inthavong 2022	animal	2018-2021	Lao PDR	market	Fecal/Stool Samples	Escherichia coli	Trimethoprim	0.648662	489.091	754
Antimicrobial Resistance Surveillance of Pigs and Chickens in the Lao People's Democratic Republic, 2018-2021	Inthavong, P.; Chanthavong, S.; Nammanininh, P.; Phommachanh, P.; Theppangna, W.; Agunos, A.; Wagenaar, J. A.; Douangngeun, B.; Loth, L.	2022	Inthavong 2022	animal	2018-2021	Lao PDR	market	Fecal/Stool Samples	Salmonella spp.	Trimethoprim	0.123028	85.8738	698
Antimicrobial Resistance Surveillance of Pigs and Chickens in the Lao People's Democratic Republic, 2018-2021	Inthavong, P.; Chanthavong, S.; Nammanininh, P.; Phommachanh, P.; Theppangna, W.; Agunos, A.; Wagenaar, J. A.; Douangngeun, B.; Loth, L.	2022	Inthavong 2022	animal	2018-2021	Lao PDR	market	Fecal/Stool Samples	Salmonella spp.	Trimethoprim	0.488959	329.069	673
Antimicrobial Resistance Surveillance of Pigs and Chickens in the Lao People's Democratic Republic, 2018-2021	Inthavong, P.; Chanthavong, S.; Nammanininh, P.; Phommachanh, P.; Theppangna, W.; Agunos, A.; Wagenaar, J. A.; Douangngeun, B.; Loth, L.	2022	Inthavong 2022	animal	2018-2021	Lao PDR	market	Fecal/Stool Samples	Escherichia coli	Xeftazidime	0.0126199	14.0081	1110
Antimicrobial Resistance Surveillance of Pigs and Chickens in the Lao People's Democratic Republic, 2018-2021	Inthavong, P.; Chanthavong, S.; Nammanininh, P.; Phommachanh, P.; Theppangna, W.; Agunos, A.; Wagenaar, J. A.; Douangngeun, B.; Loth, L.	2022	Inthavong 2022	animal	2018-2021	Lao PDR	market	Fecal/Stool Samples	Escherichia coli	Xeftazidime	0.112569	84.8773	754
Antimicrobial Resistance Surveillance of Pigs and Chickens in the Lao People's Democratic Republic, 2018-2021	Inthavong, P.; Chanthavong, S.; Nammanininh, P.; Phommachanh, P.; Theppangna, W.; Agunos, A.; Wagenaar, J. A.; Douangngeun, B.; Loth, L.	2022	Inthavong 2022	animal	2018-2021	Lao PDR	market	Fecal/Stool Samples	Salmonella spp.	Xeftazidime	0.0157729	11.0095	698
Antimicrobial Resistance Surveillance of Pigs and Chickens in the Lao People's Democratic Republic, 2018-2021	Inthavong, P.; Chanthavong, S.; Nammanininh, P.; Phommachanh, P.; Theppangna, W.; Agunos, A.; Wagenaar, J. A.; Douangngeun, B.; Loth, L.	2022	Inthavong 2022	animal	2018-2021	Lao PDR	market	Fecal/Stool Samples	Salmonella spp.	Xeftazidime	0.100946	67.9369	673
Antimicrobial resistance, Extended-Spectrum 尾-Lactamase production and virulence genes in Salmonella enterica and Escherichia coli isolates from estuarine environment	Jeamsripong, S.; Kuldee, M.; Thaotumpitak, V.; Chuanchuen, R.	2023	Jeamsripong 2023	animal	between April 2016 and March 2017	Thailand	Rivers	Animal samples	Escherichia coli	Ampicillin	124 (49.6%)	124	250
Antimicrobial resistance, Extended-Spectrum 尾-Lactamase production and virulence genes in Salmonella enterica and Escherichia coli isolates from estuarine environment	Jeamsripong, S.; Kuldee, M.; Thaotumpitak, V.; Chuanchuen, R.	2023	Jeamsripong 2023	environmental	between April 2016 and March 2017	Thailand	Rivers	Water samples	Escherichia coli	Ampicillin	102 (64.2%)	102	159
Antimicrobial resistance, Extended-Spectrum 尾-Lactamase production and virulence genes in Salmonella enterica and Escherichia coli isolates from estuarine environment	Jeamsripong, S.; Kuldee, M.; Thaotumpitak, V.; Chuanchuen, R.	2023	Jeamsripong 2023	animal	between April 2016 and March 2017	Thailand	Rivers	Animal samples	Salmonella spp.	Ampicillin	46 (37.4%)	46	123
Antimicrobial resistance, Extended-Spectrum 尾-Lactamase production and virulence genes in Salmonella enterica and Escherichia coli isolates from estuarine environment	Jeamsripong, S.; Kuldee, M.; Thaotumpitak, V.; Chuanchuen, R.	2023	Jeamsripong 2023	animal	between April 2016 and March 2017	Thailand	Rivers	Animal samples	Escherichia coli	Cefotaxime	0	0	250
Antimicrobial resistance, Extended-Spectrum 尾-Lactamase production and virulence genes in Salmonella enterica and Escherichia coli isolates from estuarine environment	Jeamsripong, S.; Kuldee, M.; Thaotumpitak, V.; Chuanchuen, R.	2023	Jeamsripong 2023	environmental	between April 2016 and March 2017	Thailand	Rivers	Water samples	Escherichia coli	Cefotaxime	11 (6.9%)	11	159
Antimicrobial resistance, Extended-Spectrum 尾-Lactamase production and virulence genes in Salmonella enterica and Escherichia coli isolates from estuarine environment	Jeamsripong, S.; Kuldee, M.; Thaotumpitak, V.; Chuanchuen, R.	2023	Jeamsripong 2023	animal	between April 2016 and March 2017	Thailand	Rivers	Animal samples	Salmonella spp.	Cefotaxime	23 (18.7%)	23	123
Antimicrobial resistance, Extended-Spectrum 尾-Lactamase production and virulence genes in Salmonella enterica and Escherichia coli isolates from estuarine environment	Jeamsripong, S.; Kuldee, M.; Thaotumpitak, V.; Chuanchuen, R.	2023	Jeamsripong 2023	environmental	between April 2016 and March 2017	Thailand	Rivers	Water samples	Escherichia coli	Cefpodoxime	8 (5.0%)	8	159
Antimicrobial resistance, Extended-Spectrum 尾-Lactamase production and virulence genes in Salmonella enterica and Escherichia coli isolates from estuarine environment	Jeamsripong, S.; Kuldee, M.; Thaotumpitak, V.; Chuanchuen, R.	2023	Jeamsripong 2023	animal	between April 2016 and March 2017	Thailand	Rivers	Animal samples	Escherichia coli	Cefpodoxime	0	0	250
Antimicrobial resistance, Extended-Spectrum 尾-Lactamase production and virulence genes in Salmonella enterica and Escherichia coli isolates from estuarine environment	Jeamsripong, S.; Kuldee, M.; Thaotumpitak, V.; Chuanchuen, R.	2023	Jeamsripong 2023	animal	between April 2016 and March 2017	Thailand	Rivers	Animal samples	Salmonella spp.	Cefpodoxime	3 (2.4%)	3	123
Antimicrobial resistance, Extended-Spectrum 尾-Lactamase production and virulence genes in Salmonella enterica and Escherichia coli isolates from estuarine environment	Jeamsripong, S.; Kuldee, M.; Thaotumpitak, V.; Chuanchuen, R.	2023	Jeamsripong 2023	animal	between April 2016 and March 2017	Thailand	Rivers	Animal samples	Escherichia coli	Ceftazidime	-	-	250
Antimicrobial resistance, Extended-Spectrum 尾-Lactamase production and virulence genes in Salmonella enterica and Escherichia coli isolates from estuarine environment	Jeamsripong, S.; Kuldee, M.; Thaotumpitak, V.; Chuanchuen, R.	2023	Jeamsripong 2023	environmental	between April 2016 and March 2017	Thailand	Rivers	Water samples	Escherichia coli	Ceftazidime	5 (3.1%)	5	159
Antimicrobial resistance, Extended-Spectrum 尾-Lactamase production and virulence genes in Salmonella enterica and Escherichia coli isolates from estuarine environment	Jeamsripong, S.; Kuldee, M.; Thaotumpitak, V.; Chuanchuen, R.	2023	Jeamsripong 2023	animal	between April 2016 and March 2017	Thailand	Rivers	Animal samples	Salmonella spp.	Ceftazidime	4 (3.3%)	4	123
Antimicrobial resistance, Extended-Spectrum 尾-Lactamase production and virulence genes in Salmonella enterica and Escherichia coli isolates from estuarine environment	Jeamsripong, S.; Kuldee, M.; Thaotumpitak, V.; Chuanchuen, R.	2023	Jeamsripong 2023	animal	between April 2016 and March 2017	Thailand	Rivers	Animal samples	Escherichia coli	Chloramphenicol	38 (15.2%)	38	250
Antimicrobial resistance, Extended-Spectrum 尾-Lactamase production and virulence genes in Salmonella enterica and Escherichia coli isolates from estuarine environment	Jeamsripong, S.; Kuldee, M.; Thaotumpitak, V.; Chuanchuen, R.	2023	Jeamsripong 2023	environmental	between April 2016 and March 2017	Thailand	Rivers	Water samples	Escherichia coli	Chloramphenicol	38 (23.9%)	38	159
Antimicrobial resistance, Extended-Spectrum 尾-Lactamase production and virulence genes in Salmonella enterica and Escherichia coli isolates from estuarine environment	Jeamsripong, S.; Kuldee, M.; Thaotumpitak, V.; Chuanchuen, R.	2023	Jeamsripong 2023	animal	between April 2016 and March 2017	Thailand	Rivers	Animal samples	Salmonella spp.	Chloramphenicol	13 (10.6%)	13	123
Antimicrobial resistance, Extended-Spectrum 尾-Lactamase production and virulence genes in Salmonella enterica and Escherichia coli isolates from estuarine environment	Jeamsripong, S.; Kuldee, M.; Thaotumpitak, V.; Chuanchuen, R.	2023	Jeamsripong 2023	animal	between April 2016 and March 2017	Thailand	Rivers	Animal samples	Escherichia coli	Ciprofloxacin	12 (4.8%)	12	250
Antimicrobial resistance, Extended-Spectrum 尾-Lactamase production and virulence genes in Salmonella enterica and Escherichia coli isolates from estuarine environment	Jeamsripong, S.; Kuldee, M.; Thaotumpitak, V.; Chuanchuen, R.	2023	Jeamsripong 2023	environmental	between April 2016 and March 2017	Thailand	Rivers	Water samples	Escherichia coli	Ciprofloxacin	8 (5.0%)	8	159
Antimicrobial resistance, Extended-Spectrum 尾-Lactamase production and virulence genes in Salmonella enterica and Escherichia coli isolates from estuarine environment	Jeamsripong, S.; Kuldee, M.; Thaotumpitak, V.; Chuanchuen, R.	2023	Jeamsripong 2023	animal	between April 2016 and March 2017	Thailand	Rivers	Animal samples	Salmonella spp.	Ciprofloxacin	11 (8.9%)	11	123
Antimicrobial resistance, Extended-Spectrum 尾-Lactamase production and virulence genes in Salmonella enterica and Escherichia coli isolates from estuarine environment	Jeamsripong, S.; Kuldee, M.; Thaotumpitak, V.; Chuanchuen, R.		Jeamsripong 2023	animal	between April 2016 and March 2017	Thailand	Rivers	Animal samples	Escherichia coli	ESBLs		8	409
Antimicrobial resistance, Extended-Spectrum 尾-Lactamase production and virulence genes in Salmonella enterica and Escherichia coli isolates from estuarine environment	Jeamsripong, S.; Kuldee, M.; Thaotumpitak, V.; Chuanchuen, R.		Jeamsripong 2023	environmental	between April 2016 and March 2017	Thailand	Rivers	Water samples	Salmonella spp.	ESBLs		2	126
Antimicrobial resistance, Extended-Spectrum 尾-Lactamase production and virulence genes in Salmonella enterica and Escherichia coli isolates from estuarine environment	Jeamsripong, S.; Kuldee, M.; Thaotumpitak, V.; Chuanchuen, R.	2023	Jeamsripong 2023	animal	between April 2016 and March 2017	Thailand	Rivers	Animal samples	Escherichia coli	Gentamicin	11 (4.4%)	11	250
Antimicrobial resistance, Extended-Spectrum 尾-Lactamase production and virulence genes in Salmonella enterica and Escherichia coli isolates from estuarine environment	Jeamsripong, S.; Kuldee, M.; Thaotumpitak, V.; Chuanchuen, R.	2023	Jeamsripong 2023	environmental	between April 2016 and March 2017	Thailand	Rivers	Water samples	Escherichia coli	Gentamicin	9 (5.7%)	9	159
Antimicrobial resistance, Extended-Spectrum 尾-Lactamase production and virulence genes in Salmonella enterica and Escherichia coli isolates from estuarine environment	Jeamsripong, S.; Kuldee, M.; Thaotumpitak, V.; Chuanchuen, R.	2023	Jeamsripong 2023	animal	between April 2016 and March 2017	Thailand	Rivers	Animal samples	Salmonella spp.	Gentamicin	12 (9.8%)	12	123
Antimicrobial resistance, Extended-Spectrum 尾-Lactamase production and virulence genes in Salmonella enterica and Escherichia coli isolates from estuarine environment	Jeamsripong, S.; Kuldee, M.; Thaotumpitak, V.; Chuanchuen, R.	2023	Jeamsripong 2023	environmental	between April 2016 and March 2017	Thailand	Rivers	Water samples	Escherichia coli	Streptomycin	57 (35.8%)	57	159
Antimicrobial resistance, Extended-Spectrum 尾-Lactamase production and virulence genes in Salmonella enterica and Escherichia coli isolates from estuarine environment	Jeamsripong, S.; Kuldee, M.; Thaotumpitak, V.; Chuanchuen, R.	2023	Jeamsripong 2023	animal	between April 2016 and March 2017	Thailand	Rivers	Animal samples	Escherichia coli	Streptomycin	75 (30.0%)	75	250
Antimicrobial resistance, Extended-Spectrum 尾-Lactamase production and virulence genes in Salmonella enterica and Escherichia coli isolates from estuarine environment	Jeamsripong, S.; Kuldee, M.; Thaotumpitak, V.; Chuanchuen, R.	2023	Jeamsripong 2023	animal	between April 2016 and March 2017	Thailand	Rivers	Animal samples	Salmonella spp.	Streptomycin	11 (8.9%)	11	123
Antimicrobial resistance, Extended-Spectrum 尾-Lactamase production and virulence genes in Salmonella enterica and Escherichia coli isolates from estuarine environment	Jeamsripong, S.; Kuldee, M.; Thaotumpitak, V.; Chuanchuen, R.	2023	Jeamsripong 2023	environmental	between April 2016 and March 2017	Thailand	Rivers	Water samples	Escherichia coli	Sulfamethoxazole	114 (71.7%)	114	159
Antimicrobial resistance, Extended-Spectrum 尾-Lactamase production and virulence genes in Salmonella enterica and Escherichia coli isolates from estuarine environment	Jeamsripong, S.; Kuldee, M.; Thaotumpitak, V.; Chuanchuen, R.	2023	Jeamsripong 2023	animal	between April 2016 and March 2017	Thailand	Rivers	Animal samples	Escherichia coli	Sulfamethoxazole	204 (81.6%)	204	250
Antimicrobial resistance, Extended-Spectrum 尾-Lactamase production and virulence genes in Salmonella enterica and Escherichia coli isolates from estuarine environment	Jeamsripong, S.; Kuldee, M.; Thaotumpitak, V.; Chuanchuen, R.	2023	Jeamsripong 2023	animal	between April 2016 and March 2017	Thailand	Rivers	Animal samples	Salmonella spp.	Sulfamethoxazole	117 (95.1%)	11	123
Antimicrobial resistance, Extended-Spectrum 尾-Lactamase production and virulence genes in Salmonella enterica and Escherichia coli isolates from estuarine environment	Jeamsripong, S.; Kuldee, M.; Thaotumpitak, V.; Chuanchuen, R.	2023	Jeamsripong 2023	animal	between April 2016 and March 2017	Thailand	Rivers	Animal samples	Escherichia coli	Tetracycline	95 (38.0%)	95	250
Antimicrobial resistance, Extended-Spectrum 尾-Lactamase production and virulence genes in Salmonella enterica and Escherichia coli isolates from estuarine environment	Jeamsripong, S.; Kuldee, M.; Thaotumpitak, V.; Chuanchuen, R.	2023	Jeamsripong 2023	environmental	between April 2016 and March 2017	Thailand	Rivers	Water samples	Escherichia coli	Tetracycline	69 (43.4%)	69	159
Antimicrobial resistance, Extended-Spectrum 尾-Lactamase production and virulence genes in Salmonella enterica and Escherichia coli isolates from estuarine environment	Jeamsripong, S.; Kuldee, M.; Thaotumpitak, V.; Chuanchuen, R.	2023	Jeamsripong 2023	animal	between April 2016 and March 2017	Thailand	Rivers	Animal samples	Salmonella spp.	Tetracycline	31 (25.2%)	31	123
Antimicrobial resistance, Extended-Spectrum 尾-Lactamase production and virulence genes in Salmonella enterica and Escherichia coli isolates from estuarine environment	Jeamsripong, S.; Kuldee, M.; Thaotumpitak, V.; Chuanchuen, R.	2023	Jeamsripong 2023	animal	between April 2016 and March 2017	Thailand	Rivers	Animal samples	Escherichia coli	Trimethoprim	83 (33.2%)	83	250
Antimicrobial resistance, Extended-Spectrum 尾-Lactamase production and virulence genes in Salmonella enterica and Escherichia coli isolates from estuarine environment	Jeamsripong, S.; Kuldee, M.; Thaotumpitak, V.; Chuanchuen, R.	2023	Jeamsripong 2023	environmental	between April 2016 and March 2017	Thailand	Rivers	Water samples	Escherichia coli	Trimethoprim	67 (42.1%)	67	159
Antimicrobial resistance, Extended-Spectrum 尾-Lactamase production and virulence genes in Salmonella enterica and Escherichia coli isolates from estuarine environment	Jeamsripong, S.; Kuldee, M.; Thaotumpitak, V.; Chuanchuen, R.	2023	Jeamsripong 2023	animal	between April 2016 and March 2017	Thailand	Rivers	Animal samples	Salmonella spp.	Trimethoprim	47 (38.2%)	47	123
Molecular Epidemiology of Antimicrobial Resistance and Virulence Profiles of Escherichia coli, Salmonella spp., and Vibrio spp. Isolated from Coastal Seawater for Aquaculture	Jeamsripong, S.; Thaotumpitak, V.; Anuntawirun, S.; Roongrojmongkhon, N.; Atwill, E. R.; Hinthong, W.	2022	Jeamsripong 2022	environmental	ebruary 2021 to January 2022	Thailand	Marine environment	Water samples	Escherichia coli	Ampicillin	0.392857	33	84
Molecular Epidemiology of Antimicrobial Resistance and Virulence Profiles of Escherichia coli, Salmonella spp., and Vibrio spp. Isolated from Coastal Seawater for Aquaculture	Jeamsripong, S.; Thaotumpitak, V.; Anuntawirun, S.; Roongrojmongkhon, N.; Atwill, E. R.; Hinthong, W.	2022	Jeamsripong 2022	environmental	ebruary 2021 to January 2022	Thailand	Marine environment	Water samples	Salmonella spp.	Ampicillin	0.166667	2	12
Molecular Epidemiology of Antimicrobial Resistance and Virulence Profiles of Escherichia coli, Salmonella spp., and Vibrio spp. Isolated from Coastal Seawater for Aquaculture	Jeamsripong, S.; Thaotumpitak, V.; Anuntawirun, S.; Roongrojmongkhon, N.; Atwill, E. R.; Hinthong, W.	2022	Jeamsripong 2022	environmental	ebruary 2021 to January 2022	Thailand	Marine environment	Water samples	Escherichia coli	Cefotaxime	0	0	84
Molecular Epidemiology of Antimicrobial Resistance and Virulence Profiles of Escherichia coli, Salmonella spp., and Vibrio spp. Isolated from Coastal Seawater for Aquaculture	Jeamsripong, S.; Thaotumpitak, V.; Anuntawirun, S.; Roongrojmongkhon, N.; Atwill, E. R.; Hinthong, W.	2022	Jeamsripong 2022	environmental	ebruary 2021 to January 2022	Thailand	Marine environment	Water samples	Salmonella spp.	Cefotaxime	0	0	12
Molecular Epidemiology of Antimicrobial Resistance and Virulence Profiles of Escherichia coli, Salmonella spp., and Vibrio spp. Isolated from Coastal Seawater for Aquaculture	Jeamsripong, S.; Thaotumpitak, V.; Anuntawirun, S.; Roongrojmongkhon, N.; Atwill, E. R.; Hinthong, W.	2022	Jeamsripong 2022	environmental	ebruary 2021 to January 2022	Thailand	Marine environment	Water samples	Escherichia coli	Cefpodoxime	0	0	84
Molecular Epidemiology of Antimicrobial Resistance and Virulence Profiles of Escherichia coli, Salmonella spp., and Vibrio spp. Isolated from Coastal Seawater for Aquaculture	Jeamsripong, S.; Thaotumpitak, V.; Anuntawirun, S.; Roongrojmongkhon, N.; Atwill, E. R.; Hinthong, W.	2022	Jeamsripong 2022	environmental	ebruary 2021 to January 2022	Thailand	Marine environment	Water samples	Salmonella spp.	Cefpodoxime	0	0	12
Molecular Epidemiology of Antimicrobial Resistance and Virulence Profiles of Escherichia coli, Salmonella spp., and Vibrio spp. Isolated from Coastal Seawater for Aquaculture	Jeamsripong, S.; Thaotumpitak, V.; Anuntawirun, S.; Roongrojmongkhon, N.; Atwill, E. R.; Hinthong, W.	2022	Jeamsripong 2022	environmental	ebruary 2021 to January 2022	Thailand	Marine environment	Water samples	Escherichia coli	Ceftazidime	0.0119048	1	84
Molecular Epidemiology of Antimicrobial Resistance and Virulence Profiles of Escherichia coli, Salmonella spp., and Vibrio spp. Isolated from Coastal Seawater for Aquaculture	Jeamsripong, S.; Thaotumpitak, V.; Anuntawirun, S.; Roongrojmongkhon, N.; Atwill, E. R.; Hinthong, W.	2022	Jeamsripong 2022	environmental	ebruary 2021 to January 2022	Thailand	Marine environment	Water samples	Salmonella spp.	Ceftazidime	0.0833333	1	12
Molecular Epidemiology of Antimicrobial Resistance and Virulence Profiles of Escherichia coli, Salmonella spp., and Vibrio spp. Isolated from Coastal Seawater for Aquaculture	Jeamsripong, S.; Thaotumpitak, V.; Anuntawirun, S.; Roongrojmongkhon, N.; Atwill, E. R.; Hinthong, W.	2022	Jeamsripong 2022	environmental	ebruary 2021 to January 2022	Thailand	Marine environment	Water samples	Escherichia coli	Chloramphenicol	0.0595238	5	84
Molecular Epidemiology of Antimicrobial Resistance and Virulence Profiles of Escherichia coli, Salmonella spp., and Vibrio spp. Isolated from Coastal Seawater for Aquaculture	Jeamsripong, S.; Thaotumpitak, V.; Anuntawirun, S.; Roongrojmongkhon, N.; Atwill, E. R.; Hinthong, W.	2022	Jeamsripong 2022	environmental	ebruary 2021 to January 2022	Thailand	Marine environment	Water samples	Salmonella spp.	Chloramphenicol	0.0833333	1	12
Molecular Epidemiology of Antimicrobial Resistance and Virulence Profiles of Escherichia coli, Salmonella spp., and Vibrio spp. Isolated from Coastal Seawater for Aquaculture	Jeamsripong, S.; Thaotumpitak, V.; Anuntawirun, S.; Roongrojmongkhon, N.; Atwill, E. R.; Hinthong, W.	2022	Jeamsripong 2022	environmental	ebruary 2021 to January 2022	Thailand	Marine environment	Water samples	Escherichia coli	Ciprofloxacin	0.0238095	2	84
Molecular Epidemiology of Antimicrobial Resistance and Virulence Profiles of Escherichia coli, Salmonella spp., and Vibrio spp. Isolated from Coastal Seawater for Aquaculture	Jeamsripong, S.; Thaotumpitak, V.; Anuntawirun, S.; Roongrojmongkhon, N.; Atwill, E. R.; Hinthong, W.	2022	Jeamsripong 2022	environmental	ebruary 2021 to January 2022	Thailand	Marine environment	Water samples	Salmonella spp.	Ciprofloxacin	0	0	12
Molecular Epidemiology of Antimicrobial Resistance and Virulence Profiles of Escherichia coli, Salmonella spp., and Vibrio spp. Isolated from Coastal Seawater for Aquaculture	Jeamsripong, S.; Thaotumpitak, V.; Anuntawirun, S.; Roongrojmongkhon, N.; Atwill, E. R.; Hinthong, W.	2022	Jeamsripong 2022	environmental	ebruary 2021 to January 2022	Thailand	Marine environment	Water samples	Escherichia coli	Gentamicin	0.0119048	1	84
Molecular Epidemiology of Antimicrobial Resistance and Virulence Profiles of Escherichia coli, Salmonella spp., and Vibrio spp. Isolated from Coastal Seawater for Aquaculture	Jeamsripong, S.; Thaotumpitak, V.; Anuntawirun, S.; Roongrojmongkhon, N.; Atwill, E. R.; Hinthong, W.	2022	Jeamsripong 2022	environmental	ebruary 2021 to January 2022	Thailand	Marine environment	Water samples	Salmonella spp.	Gentamicin	0	0	12
Molecular Epidemiology of Antimicrobial Resistance and Virulence Profiles of Escherichia coli, Salmonella spp., and Vibrio spp. Isolated from Coastal Seawater for Aquaculture	Jeamsripong, S.; Thaotumpitak, V.; Anuntawirun, S.; Roongrojmongkhon, N.; Atwill, E. R.; Hinthong, W.	2022	Jeamsripong 2022	environmental	ebruary 2021 to January 2022	Thailand	Marine environment	Water samples	Escherichia coli	Streptomycin	0.142857	12	84
Molecular Epidemiology of Antimicrobial Resistance and Virulence Profiles of Escherichia coli, Salmonella spp., and Vibrio spp. Isolated from Coastal Seawater for Aquaculture	Jeamsripong, S.; Thaotumpitak, V.; Anuntawirun, S.; Roongrojmongkhon, N.; Atwill, E. R.; Hinthong, W.	2022	Jeamsripong 2022	environmental	ebruary 2021 to January 2022	Thailand	Marine environment	Water samples	Salmonella spp.	Streptomycin	0.0833333	1	12
Molecular Epidemiology of Antimicrobial Resistance and Virulence Profiles of Escherichia coli, Salmonella spp., and Vibrio spp. Isolated from Coastal Seawater for Aquaculture	Jeamsripong, S.; Thaotumpitak, V.; Anuntawirun, S.; Roongrojmongkhon, N.; Atwill, E. R.; Hinthong, W.	2022	Jeamsripong 2022	environmental	ebruary 2021 to January 2022	Thailand	Marine environment	Water samples	Escherichia coli	Sulfamethoxazole	0.166667	14	84
Molecular Epidemiology of Antimicrobial Resistance and Virulence Profiles of Escherichia coli, Salmonella spp., and Vibrio spp. Isolated from Coastal Seawater for Aquaculture	Jeamsripong, S.; Thaotumpitak, V.; Anuntawirun, S.; Roongrojmongkhon, N.; Atwill, E. R.; Hinthong, W.	2022	Jeamsripong 2022	environmental	ebruary 2021 to January 2022	Thailand	Marine environment	Water samples	Salmonella spp.	Sulfamethoxazole	0.0833333	1	12
Molecular Epidemiology of Antimicrobial Resistance and Virulence Profiles of Escherichia coli, Salmonella spp., and Vibrio spp. Isolated from Coastal Seawater for Aquaculture	Jeamsripong, S.; Thaotumpitak, V.; Anuntawirun, S.; Roongrojmongkhon, N.; Atwill, E. R.; Hinthong, W.	2022	Jeamsripong 2022	environmental	ebruary 2021 to January 2022	Thailand	Marine environment	Water samples	Escherichia coli	Tetracycline	0.357143	30	84
Molecular Epidemiology of Antimicrobial Resistance and Virulence Profiles of Escherichia coli, Salmonella spp., and Vibrio spp. Isolated from Coastal Seawater for Aquaculture	Jeamsripong, S.; Thaotumpitak, V.; Anuntawirun, S.; Roongrojmongkhon, N.; Atwill, E. R.; Hinthong, W.	2022	Jeamsripong 2022	environmental	ebruary 2021 to January 2022	Thailand	Marine environment	Water samples	Salmonella spp.	Tetracycline	0.166667	2	12
Molecular Epidemiology of Antimicrobial Resistance and Virulence Profiles of Escherichia coli, Salmonella spp., and Vibrio spp. Isolated from Coastal Seawater for Aquaculture	Jeamsripong, S.; Thaotumpitak, V.; Anuntawirun, S.; Roongrojmongkhon, N.; Atwill, E. R.; Hinthong, W.	2022	Jeamsripong 2022	environmental	ebruary 2021 to January 2022	Thailand	Marine environment	Water samples	Escherichia coli	Trimethoprim	0.119048	10	84
Molecular Epidemiology of Antimicrobial Resistance and Virulence Profiles of Escherichia coli, Salmonella spp., and Vibrio spp. Isolated from Coastal Seawater for Aquaculture	Jeamsripong, S.; Thaotumpitak, V.; Anuntawirun, S.; Roongrojmongkhon, N.; Atwill, E. R.; Hinthong, W.	2022	Jeamsripong 2022	environmental	ebruary 2021 to January 2022	Thailand	Marine environment	Water samples	Salmonella spp.	Trimethoprim	0	0	12
Detection of multi-drug resistant (MDR) Escherichia coli and tet gene prevalence at a pig farm in Kupang , Indonesia	Kallau, N. H. G.; Wibawan, I. W. T.; Lukman, D. W.; Sudarwanto, M. B.	2018	Kallau 2018	animal	March 2017 to February 2018	Indonesia	livestock farms	Fecal/Stool Samples	Escherichia coli	Amoxicillin	0.291	23	82
Detection of multi-drug resistant (MDR) Escherichia coli and tet gene prevalence at a pig farm in Kupang , Indonesia	Kallau, N. H. G.; Wibawan, I. W. T.; Lukman, D. W.; Sudarwanto, M. B.	2018	Kallau 2018	animal	March 2017 to February 2018	Indonesia	livestock farms	Fecal/Stool Samples	Escherichia coli	Cefalotin	0.608	48	82
Detection of multi-drug resistant (MDR) Escherichia coli and tet gene prevalence at a pig farm in Kupang , Indonesia	Kallau, N. H. G.; Wibawan, I. W. T.; Lukman, D. W.; Sudarwanto, M. B.	2018	Kallau 2018	animal	March 2017 to February 2018	Indonesia	livestock farms	Fecal/Stool Samples	Escherichia coli	Cefotaxime	0.127	10	82
Detection of multi-drug resistant (MDR) Escherichia coli and tet gene prevalence at a pig farm in Kupang , Indonesia	Kallau, N. H. G.; Wibawan, I. W. T.; Lukman, D. W.; Sudarwanto, M. B.	2018	Kallau 2018	animal	March 2017 to February 2018	Indonesia	livestock farms	Fecal/Stool Samples	Escherichia coli	Ciprofloxacin	0.013	1	82
Detection of multi-drug resistant (MDR) Escherichia coli and tet gene prevalence at a pig farm in Kupang , Indonesia	Kallau, N. H. G.; Wibawan, I. W. T.; Lukman, D. W.; Sudarwanto, M. B.	2018	Kallau 2018	animal	March 2017 to February 2018	Indonesia	livestock farms	Fecal/Stool Samples	Escherichia coli	Colistin	0.354	28	82
Detection of multi-drug resistant (MDR) Escherichia coli and tet gene prevalence at a pig farm in Kupang , Indonesia	Kallau, N. H. G.; Wibawan, I. W. T.; Lukman, D. W.; Sudarwanto, M. B.	2018	Kallau 2018	animal	March 2017 to February 2018	Indonesia	livestock farms	Fecal/Stool Samples	Escherichia coli	Doxycycline	0.127	10	82
Detection of multi-drug resistant (MDR) Escherichia coli and tet gene prevalence at a pig farm in Kupang , Indonesia	Kallau, N. H. G.; Wibawan, I. W. T.; Lukman, D. W.; Sudarwanto, M. B.	2018	Kallau 2018	animal	March 2017 to February 2018	Indonesia	livestock farms	Fecal/Stool Samples	Escherichia coli	Erythromycin	0.886	70	82
Detection of multi-drug resistant (MDR) Escherichia coli and tet gene prevalence at a pig farm in Kupang , Indonesia	Kallau, N. H. G.; Wibawan, I. W. T.; Lukman, D. W.; Sudarwanto, M. B.	2018	Kallau 2018	animal	March 2017 to February 2018	Indonesia	livestock farms	Fecal/Stool Samples	Escherichia coli	Gentamicin	0.051	4	82
Detection of multi-drug resistant (MDR) Escherichia coli and tet gene prevalence at a pig farm in Kupang , Indonesia	Kallau, N. H. G.; Wibawan, I. W. T.; Lukman, D. W.; Sudarwanto, M. B.	2018	Kallau 2018	animal	March 2017 to February 2018	Indonesia	livestock farms	Fecal/Stool Samples	Escherichia coli	Nalidixic acid	0.025	2	82
Detection of multi-drug resistant (MDR) Escherichia coli and tet gene prevalence at a pig farm in Kupang , Indonesia	Kallau, N. H. G.; Wibawan, I. W. T.; Lukman, D. W.; Sudarwanto, M. B.	2018	Kallau 2018	animal	March 2017 to February 2018	Indonesia	livestock farms	Fecal/Stool Samples	Escherichia coli	Streptomycin	0.329	26	82
Detection of multi-drug resistant (MDR) Escherichia coli and tet gene prevalence at a pig farm in Kupang , Indonesia	Kallau, N. H. G.; Wibawan, I. W. T.; Lukman, D. W.; Sudarwanto, M. B.	2018	Kallau 2018	animal	March 2017 to February 2018	Indonesia	livestock farms	Fecal/Stool Samples	Escherichia coli	Sulfamethoxazole/trimethoprim	0.152	12	82
Detection of multi-drug resistant (MDR) Escherichia coli and tet gene prevalence at a pig farm in Kupang , Indonesia	Kallau, N. H. G.; Wibawan, I. W. T.; Lukman, D. W.; Sudarwanto, M. B.	2018	Kallau 2018	animal	March 2017 to February 2018	Indonesia	livestock farms	Fecal/Stool Samples	Escherichia coli	Tetracycline	0.304	24	82
Clinical and bacteriological profile of culture-negative and culture-proven neonatal sepsis in Palembang, Indonesia	Karmila, A.; Barchia, I.; Ramandati, A.; Zhang, L.	2022	Karmila 2022	human	2016-2018	Indonesia	hospital	Clinical samples	Enterobacter spp.	Cephalosporin	0.8	8	10
Clinical and bacteriological profile of culture-negative and culture-proven neonatal sepsis in Palembang, Indonesia	Karmila, A.; Barchia, I.; Ramandati, A.; Zhang, L.	2022	Karmila 2022	human	2016-2018	Indonesia	hospital	Clinical samples	Enterobacter spp.	Cephalosporin	0.615385	16	26
Epidemiology of Antibiotic Use and Antimicrobial Resistance in Selected Communities in Thailand	Khamsarn, S.; Nampoonsak, Y.; Busamaro, S.; Tangkoskul, T.; Seenama, C.; Rattanaumpawan, P.; Boonyasiri, A.; Thamlikitkul, V.	2016	Khamsarn 2016	food	2014 and 2015	Thailand	community	Other	Escherichia coli	ESBLs	0.264	46	174
Epidemiology of Antibiotic Use and Antimicrobial Resistance in Selected Communities in Thailand	Khamsarn, S.; Nampoonsak, Y.; Busamaro, S.; Tangkoskul, T.; Seenama, C.; Rattanaumpawan, P.; Boonyasiri, A.; Thamlikitkul, V.	2016	Khamsarn 2016	human	2014 and 2015	Thailand	community	Fecal/Stool Samples	Escherichia coli	ESBLs	0.665	355	534
In vitro activity of ceftazidime-avibactam and comparators against Gram-negative bacterial isolates collected in the Asia-Pacific region as part of the INFORM program (2015-2017)	Ko, W. C.; Stone, G. G.	2020	Ko 2020	human	2015	Malaysia	hospital	Clinical samples	Escherichia coli	ESBLs	0.167	12	72
In vitro activity of ceftazidime-avibactam and comparators against Gram-negative bacterial isolates collected in the Asia-Pacific region as part of the INFORM program (2015-2017)	Ko, W. C.; Stone, G. G.	2020	Ko 2020	human	2015-2017	Philippines	hospital	Clinical samples	Escherichia coli	ESBLs	0.329466	142	431
In vitro activity of ceftazidime-avibactam and comparators against Gram-negative bacterial isolates collected in the Asia-Pacific region as part of the INFORM program (2015-2017)	Ko, W. C.; Stone, G. G.	2020	Ko 2020	human	2015-2017	Thailand	hospital	Clinical samples	Escherichia coli	ESBLs	0.518207	185	357
In vitro activity of ceftazidime-avibactam and comparators against Gram-negative bacterial isolates collected in the Asia-Pacific region as part of the INFORM program (2015-2017)	Ko, W. C.; Stone, G. G.	2020	Ko 2020	human	2015	Malaysia	hospital	Clinical samples	Klebsiella pneumoniae	ESBLs	0.388	31	80
In vitro activity of ceftazidime-avibactam and comparators against Gram-negative bacterial isolates collected in the Asia-Pacific region as part of the INFORM program (2015-2017)	Ko, W. C.; Stone, G. G.	2020	Ko 2020	human	2015-2017	Philippines	hospital	Clinical samples	Klebsiella pneumoniae	ESBLs	0.341067	147	439
In vitro activity of ceftazidime-avibactam and comparators against Gram-negative bacterial isolates collected in the Asia-Pacific region as part of the INFORM program (2015-2017)	Ko, W. C.; Stone, G. G.	2020	Ko 2020	human	2015-2017	Thailand	hospital	Clinical samples	Klebsiella pneumoniae	ESBLs	0.352941	126	358
Epidemiological study of antimicrobial-resistant bacteria in healthy free-ranging bantengs (Bos javanicus) and domestic cattle	Konputtar, A.; Yossapol, M.; Phaechaiyaphum, T.; Manyuen, P.; Suetrong, N.; Ruksachat, N.; Purisotayo, T.	2023	Konputtar 2023	animal	From August 2021 to October 2022	Thailand	wild habitat	Fecal/Stool Samples	Escherichia coli	Cefotaxime	0.333	15	45
Epidemiological study of antimicrobial-resistant bacteria in healthy free-ranging bantengs (Bos javanicus) and domestic cattle	Konputtar, A.; Yossapol, M.; Phaechaiyaphum, T.; Manyuen, P.; Suetrong, N.; Ruksachat, N.; Purisotayo, T.	2023	Konputtar 2023	animal	From August 2021 to October 2022	Thailand	livestock farms	Fecal/Stool Samples	Escherichia coli	Cefotaxime	0.0666667	1	15
Epidemiological study of antimicrobial-resistant bacteria in healthy free-ranging bantengs (Bos javanicus) and domestic cattle	Konputtar, A.; Yossapol, M.; Phaechaiyaphum, T.; Manyuen, P.; Suetrong, N.; Ruksachat, N.; Purisotayo, T.	2023	Konputtar 2023	animal	From August 2021 to October 2022	Thailand	wild habitat	Fecal/Stool Samples	Escherichia coli	ESBLs	0.333	15	45
Epidemiological study of antimicrobial-resistant bacteria in healthy free-ranging bantengs (Bos javanicus) and domestic cattle	Konputtar, A.; Yossapol, M.; Phaechaiyaphum, T.; Manyuen, P.; Suetrong, N.; Ruksachat, N.; Purisotayo, T.	2023	Konputtar 2023	animal	From August 2021 to October 2022	Thailand	livestock farms	Fecal/Stool Samples	Escherichia coli	ESBLs	0.0666667	1	15
The clinical and microbiological characteristics of enteric fever in Cambodia, 2008-2015	Kuijpers, L. M. F.; Phe, T.; Veng, C. H.; Lim, K.; Ieng, S.; Kham, C.; Fawal, N.; Fabre, L.; Le Hello, S.; Vlieghe, E.; Weill, F. X.; Jacobs, J.; Peetermans, W. E.	2017	Kuijpers 2017	human	2013-2015	Cambodia	hospital	Clinical samples	Salmonella spp.	Azithromycin	0	0	29
The clinical and microbiological characteristics of enteric fever in Cambodia, 2008-2015	Kuijpers, L. M. F.; Phe, T.; Veng, C. H.; Lim, K.; Ieng, S.; Kham, C.; Fawal, N.; Fabre, L.; Le Hello, S.; Vlieghe, E.; Weill, F. X.; Jacobs, J.; Peetermans, W. E.	2017	Kuijpers 2017	human	2013-2015	Cambodia	hospital	Clinical samples	Salmonella spp.	Azithromycin	0	0	171
The clinical and microbiological characteristics of enteric fever in Cambodia, 2008-2015	Kuijpers, L. M. F.; Phe, T.; Veng, C. H.; Lim, K.; Ieng, S.; Kham, C.; Fawal, N.; Fabre, L.; Le Hello, S.; Vlieghe, E.; Weill, F. X.; Jacobs, J.; Peetermans, W. E.	2017	Kuijpers 2017	human	2013-2015	Cambodia	hospital	Clinical samples	Salmonella spp.	Ceftriaxone	0	0	29
The clinical and microbiological characteristics of enteric fever in Cambodia, 2008-2015	Kuijpers, L. M. F.; Phe, T.; Veng, C. H.; Lim, K.; Ieng, S.; Kham, C.; Fawal, N.; Fabre, L.; Le Hello, S.; Vlieghe, E.; Weill, F. X.; Jacobs, J.; Peetermans, W. E.	2017	Kuijpers 2017	human	2013-2015	Cambodia	hospital	Clinical samples	Salmonella spp.	Ceftriaxone	0	0	171
The clinical and microbiological characteristics of enteric fever in Cambodia, 2008-2015	Kuijpers, L. M. F.; Phe, T.; Veng, C. H.; Lim, K.; Ieng, S.; Kham, C.; Fawal, N.; Fabre, L.; Le Hello, S.; Vlieghe, E.; Weill, F. X.; Jacobs, J.; Peetermans, W. E.	2017	Kuijpers 2017	human	2013-2015	Cambodia	hospital	Clinical samples	Salmonella spp.	Ertapenem	0	0	29
The clinical and microbiological characteristics of enteric fever in Cambodia, 2008-2015	Kuijpers, L. M. F.; Phe, T.; Veng, C. H.; Lim, K.; Ieng, S.; Kham, C.; Fawal, N.; Fabre, L.; Le Hello, S.; Vlieghe, E.; Weill, F. X.; Jacobs, J.; Peetermans, W. E.	2017	Kuijpers 2017	human	2013-2015	Cambodia	hospital	Clinical samples	Salmonella spp.	Ertapenem	0	0	171
The clinical and microbiological characteristics of enteric fever in Cambodia, 2008-2015	Kuijpers, L. M. F.; Phe, T.; Veng, C. H.; Lim, K.; Ieng, S.; Kham, C.; Fawal, N.; Fabre, L.; Le Hello, S.; Vlieghe, E.; Weill, F. X.; Jacobs, J.; Peetermans, W. E.	2017	Kuijpers 2017	human	2013-2015	Cambodia	hospital	Clinical samples	Salmonella spp.	Gentamicin	0	0	29
The clinical and microbiological characteristics of enteric fever in Cambodia, 2008-2015	Kuijpers, L. M. F.; Phe, T.; Veng, C. H.; Lim, K.; Ieng, S.; Kham, C.; Fawal, N.; Fabre, L.; Le Hello, S.; Vlieghe, E.; Weill, F. X.; Jacobs, J.; Peetermans, W. E.	2017	Kuijpers 2017	human	2013-2015	Cambodia	hospital	Clinical samples	Salmonella spp.	Gentamicin	0	0	171
The clinical and microbiological characteristics of enteric fever in Cambodia, 2008-2015	Kuijpers, L. M. F.; Phe, T.; Veng, C. H.; Lim, K.; Ieng, S.; Kham, C.; Fawal, N.; Fabre, L.; Le Hello, S.; Vlieghe, E.; Weill, F. X.; Jacobs, J.; Peetermans, W. E.	2017	Kuijpers 2017	human	2013-2015	Cambodia	hospital	Clinical samples	Salmonella spp.	Meropenem	0	0	29
The clinical and microbiological characteristics of enteric fever in Cambodia, 2008-2015	Kuijpers, L. M. F.; Phe, T.; Veng, C. H.; Lim, K.; Ieng, S.; Kham, C.; Fawal, N.; Fabre, L.; Le Hello, S.; Vlieghe, E.; Weill, F. X.; Jacobs, J.; Peetermans, W. E.	2017	Kuijpers 2017	human	2013-2015	Cambodia	hospital	Clinical samples	Salmonella spp.	Meropenem	0	0	171
The clinical and microbiological characteristics of enteric fever in Cambodia, 2008-2015	Kuijpers, L. M. F.; Phe, T.; Veng, C. H.; Lim, K.; Ieng, S.; Kham, C.; Fawal, N.; Fabre, L.; Le Hello, S.; Vlieghe, E.; Weill, F. X.; Jacobs, J.; Peetermans, W. E.	2017	Kuijpers 2017	human	2013-2015	Cambodia	hospital	Clinical samples	Salmonella spp.	Nalidixic acid	0.931	26.999	29
The clinical and microbiological characteristics of enteric fever in Cambodia, 2008-2015	Kuijpers, L. M. F.; Phe, T.; Veng, C. H.; Lim, K.; Ieng, S.; Kham, C.; Fawal, N.; Fabre, L.; Le Hello, S.; Vlieghe, E.; Weill, F. X.; Jacobs, J.; Peetermans, W. E.	2017	Kuijpers 2017	human	2013-2015	Cambodia	hospital	Clinical samples	Salmonella spp.	Nalidixic acid	0.123	21.033	171
The clinical and microbiological characteristics of enteric fever in Cambodia, 2008-2015	Kuijpers, L. M. F.; Phe, T.; Veng, C. H.; Lim, K.; Ieng, S.; Kham, C.; Fawal, N.; Fabre, L.; Le Hello, S.; Vlieghe, E.; Weill, F. X.; Jacobs, J.; Peetermans, W. E.	2017	Kuijpers 2017	human	2013-2015	Cambodia	hospital	Clinical samples	Salmonella spp.	Tetracycline	0.241	6.989	29
The clinical and microbiological characteristics of enteric fever in Cambodia, 2008-2015	Kuijpers, L. M. F.; Phe, T.; Veng, C. H.; Lim, K.; Ieng, S.; Kham, C.; Fawal, N.; Fabre, L.; Le Hello, S.; Vlieghe, E.; Weill, F. X.; Jacobs, J.; Peetermans, W. E.	2017	Kuijpers 2017	human	2013-2015	Cambodia	hospital	Clinical samples	Salmonella spp.	Tetracycline	0	0	171
MULTIDRUG RESISTANT AND EXTENDED SPECTRUM b-LACTAMASE PRODUCING SALMONELLA ENTERICA ISOLATED FROM FOOD ANIMALS IN PHATTHALUNG, THAILAND	Lertworapreecha, M.; Noomee, S.; Sutthimusik, S.; Utarapichat, B.; Tontikapong, K.	2016	Lertworapreecha 2016	animal	2014-2015	Thailand	livestock farms	Fecal/Stool Samples	Salmonella spp.	Ampicillin	0.5	20	40
MULTIDRUG RESISTANT AND EXTENDED SPECTRUM b-LACTAMASE PRODUCING SALMONELLA ENTERICA ISOLATED FROM FOOD ANIMALS IN PHATTHALUNG, THAILAND	Lertworapreecha, M.; Noomee, S.; Sutthimusik, S.; Utarapichat, B.; Tontikapong, K.	2016	Lertworapreecha 2016	food	2014-2015	Thailand	market	Food samples	Salmonella spp.	Ampicillin	0.78	17.94	23
MULTIDRUG RESISTANT AND EXTENDED SPECTRUM b-LACTAMASE PRODUCING SALMONELLA ENTERICA ISOLATED FROM FOOD ANIMALS IN PHATTHALUNG, THAILAND	Lertworapreecha, M.; Noomee, S.; Sutthimusik, S.; Utarapichat, B.; Tontikapong, K.	2016	Lertworapreecha 2016	food	2014-2015	Thailand	poultry farms	Food samples	Salmonella spp.	Nalidixic acid	0.27	7.83	29
MULTIDRUG RESISTANT AND EXTENDED SPECTRUM b-LACTAMASE PRODUCING SALMONELLA ENTERICA ISOLATED FROM FOOD ANIMALS IN PHATTHALUNG, THAILAND	Lertworapreecha, M.; Noomee, S.; Sutthimusik, S.; Utarapichat, B.; Tontikapong, K.	2016	Lertworapreecha 2016	food	2014-2015	Thailand	market	Food samples	Salmonella spp.	Nalidixic acid	0.61	14.03	23
MULTIDRUG RESISTANT AND EXTENDED SPECTRUM b-LACTAMASE PRODUCING SALMONELLA ENTERICA ISOLATED FROM FOOD ANIMALS IN PHATTHALUNG, THAILAND	Lertworapreecha, M.; Noomee, S.; Sutthimusik, S.; Utarapichat, B.; Tontikapong, K.	2016	Lertworapreecha 2016	food	2014-2015	Thailand	poultry farms	Food samples	Salmonella spp.	Streptomycin	0.34	9.86	29
MULTIDRUG RESISTANT AND EXTENDED SPECTRUM b-LACTAMASE PRODUCING SALMONELLA ENTERICA ISOLATED FROM FOOD ANIMALS IN PHATTHALUNG, THAILAND	Lertworapreecha, M.; Noomee, S.; Sutthimusik, S.; Utarapichat, B.; Tontikapong, K.	2016	Lertworapreecha 2016	animal	2014-2015	Thailand	livestock farms	Fecal/Stool Samples	Salmonella spp.	Streptomycin	0.47	18.8	40
MULTIDRUG RESISTANT AND EXTENDED SPECTRUM b-LACTAMASE PRODUCING SALMONELLA ENTERICA ISOLATED FROM FOOD ANIMALS IN PHATTHALUNG, THAILAND	Lertworapreecha, M.; Noomee, S.; Sutthimusik, S.; Utarapichat, B.; Tontikapong, K.	2016	Lertworapreecha 2016	food	2014-2015	Thailand	market	Food samples	Salmonella spp.	Sulfamethoxazole	0.87	26.97	31
MULTIDRUG RESISTANT AND EXTENDED SPECTRUM b-LACTAMASE PRODUCING SALMONELLA ENTERICA ISOLATED FROM FOOD ANIMALS IN PHATTHALUNG, THAILAND	Lertworapreecha, M.; Noomee, S.; Sutthimusik, S.; Utarapichat, B.; Tontikapong, K.	2016	Lertworapreecha 2016	food	2014-2015	Thailand	market	Food samples	Salmonella spp.	Sulfamethoxazole/trimethoprim	0.96	22.08	23
MULTIDRUG RESISTANT AND EXTENDED SPECTRUM b-LACTAMASE PRODUCING SALMONELLA ENTERICA ISOLATED FROM FOOD ANIMALS IN PHATTHALUNG, THAILAND	Lertworapreecha, M.; Noomee, S.; Sutthimusik, S.; Utarapichat, B.; Tontikapong, K.	2016	Lertworapreecha 2016	food	2014-2015	Thailand	market	Food samples	Salmonella spp.	Tetracycline	0.73	16.79	23
MULTIDRUG RESISTANT AND EXTENDED SPECTRUM b-LACTAMASE PRODUCING SALMONELLA ENTERICA ISOLATED FROM FOOD ANIMALS IN PHATTHALUNG, THAILAND	Lertworapreecha, M.; Noomee, S.; Sutthimusik, S.; Utarapichat, B.; Tontikapong, K.	2016	Lertworapreecha 2016	food	2014-2015	Thailand	market	Food samples	Salmonella spp.	Tetracycline	0.77	23.87	31
Antibiotic Resistance and Antibiotic Resistance Genes in Escherichia coli Isolates from Hospital Wastewater in Vietnam	Lien, T. Q.; Lan, P. T.; Chuc, N. T. K.; Hoa, N. Q.; Nhung, P. H.; Thoa, N. T. M.; Diwan, V.; Tamhankar, A. J.; St氓lsby Lundborg, C.	2017	Lien 2017	environmental	2013	Vietnam	hospital	Water samples	Escherichia coli	Amoxicillin/clavulanic acid	0.548611	79	144
Antibiotic Resistance and Antibiotic Resistance Genes in Escherichia coli Isolates from Hospital Wastewater in Vietnam	Lien, T. Q.; Lan, P. T.; Chuc, N. T. K.; Hoa, N. Q.; Nhung, P. H.; Thoa, N. T. M.; Diwan, V.; Tamhankar, A. J.; St氓lsby Lundborg, C.	2017	Lien 2017	environmental	2013	Vietnam	hospital	Water samples	Escherichia coli	Amoxicillin/clavulanic acid	0.298611	43	121
Antibiotic Resistance and Antibiotic Resistance Genes in Escherichia coli Isolates from Hospital Wastewater in Vietnam	Lien, T. Q.; Lan, P. T.; Chuc, N. T. K.; Hoa, N. Q.; Nhung, P. H.; Thoa, N. T. M.; Diwan, V.; Tamhankar, A. J.; St氓lsby Lundborg, C.	2017	Lien 2017	environmental	2013	Vietnam	hospital	Water samples	Escherichia coli	Ceftazidime	0.513889	74	144
Antibiotic Resistance and Antibiotic Resistance Genes in Escherichia coli Isolates from Hospital Wastewater in Vietnam	Lien, T. Q.; Lan, P. T.; Chuc, N. T. K.; Hoa, N. Q.; Nhung, P. H.; Thoa, N. T. M.; Diwan, V.; Tamhankar, A. J.; St氓lsby Lundborg, C.	2017	Lien 2017	environmental	2013	Vietnam	hospital	Water samples	Escherichia coli	Ceftazidime	0.487603	59	121
Antibiotic Resistance and Antibiotic Resistance Genes in Escherichia coli Isolates from Hospital Wastewater in Vietnam	Lien, T. Q.; Lan, P. T.; Chuc, N. T. K.; Hoa, N. Q.; Nhung, P. H.; Thoa, N. T. M.; Diwan, V.; Tamhankar, A. J.; St氓lsby Lundborg, C.	2017	Lien 2017	environmental	2013	Vietnam	hospital	Water samples	Escherichia coli	Ceftriaxone	0.694444	100	144
Antibiotic Resistance and Antibiotic Resistance Genes in Escherichia coli Isolates from Hospital Wastewater in Vietnam	Lien, T. Q.; Lan, P. T.; Chuc, N. T. K.; Hoa, N. Q.; Nhung, P. H.; Thoa, N. T. M.; Diwan, V.; Tamhankar, A. J.; St氓lsby Lundborg, C.	2017	Lien 2017	environmental	2013	Vietnam	hospital	Water samples	Escherichia coli	Ceftriaxone	0.61157	74	121
Antibiotic Resistance and Antibiotic Resistance Genes in Escherichia coli Isolates from Hospital Wastewater in Vietnam	Lien, T. Q.; Lan, P. T.; Chuc, N. T. K.; Hoa, N. Q.; Nhung, P. H.; Thoa, N. T. M.; Diwan, V.; Tamhankar, A. J.; St氓lsby Lundborg, C.	2017	Lien 2017	environmental	2013	Vietnam	hospital	Water samples	Escherichia coli	Ciprofloxacin	0.333333	48	144
Antibiotic Resistance and Antibiotic Resistance Genes in Escherichia coli Isolates from Hospital Wastewater in Vietnam	Lien, T. Q.; Lan, P. T.; Chuc, N. T. K.; Hoa, N. Q.; Nhung, P. H.; Thoa, N. T. M.; Diwan, V.; Tamhankar, A. J.; St氓lsby Lundborg, C.	2017	Lien 2017	environmental	2013	Vietnam	hospital	Water samples	Escherichia coli	Ciprofloxacin	0.429752	52	121
Antibiotic Resistance and Antibiotic Resistance Genes in Escherichia coli Isolates from Hospital Wastewater in Vietnam	Lien, T. Q.; Lan, P. T.; Chuc, N. T. K.; Hoa, N. Q.; Nhung, P. H.; Thoa, N. T. M.; Diwan, V.; Tamhankar, A. J.; St氓lsby Lundborg, C.	2017	Lien 2017	environmental	2013	Vietnam	hospital	Water samples	Escherichia coli	ESBLs	0.5	72	144
Antibiotic Resistance and Antibiotic Resistance Genes in Escherichia coli Isolates from Hospital Wastewater in Vietnam	Lien, T. Q.; Lan, P. T.; Chuc, N. T. K.; Hoa, N. Q.; Nhung, P. H.; Thoa, N. T. M.; Diwan, V.; Tamhankar, A. J.; St氓lsby Lundborg, C.	2017	Lien 2017	environmental	2013	Vietnam	hospital	Water samples	Escherichia coli	ESBLs	0.355372	43	121
Antibiotic Resistance and Antibiotic Resistance Genes in Escherichia coli Isolates from Hospital Wastewater in Vietnam	Lien, T. Q.; Lan, P. T.; Chuc, N. T. K.; Hoa, N. Q.; Nhung, P. H.; Thoa, N. T. M.; Diwan, V.; Tamhankar, A. J.; St氓lsby Lundborg, C.	2017	Lien 2017	environmental	2013	Vietnam	hospital	Water samples	Escherichia coli	Fosfomycin	0.00694444	1	144
Antibiotic Resistance and Antibiotic Resistance Genes in Escherichia coli Isolates from Hospital Wastewater in Vietnam	Lien, T. Q.; Lan, P. T.; Chuc, N. T. K.; Hoa, N. Q.; Nhung, P. H.; Thoa, N. T. M.; Diwan, V.; Tamhankar, A. J.; St氓lsby Lundborg, C.	2017	Lien 2017	environmental	2013	Vietnam	hospital	Water samples	Escherichia coli	Fosfomycin	0.0247934	3	121
Antibiotic Resistance and Antibiotic Resistance Genes in Escherichia coli Isolates from Hospital Wastewater in Vietnam	Lien, T. Q.; Lan, P. T.; Chuc, N. T. K.; Hoa, N. Q.; Nhung, P. H.; Thoa, N. T. M.; Diwan, V.; Tamhankar, A. J.; St氓lsby Lundborg, C.	2017	Lien 2017	environmental	2013	Vietnam	hospital	Water samples	Escherichia coli	Gentamicin	0.583333	84	144
Antibiotic Resistance and Antibiotic Resistance Genes in Escherichia coli Isolates from Hospital Wastewater in Vietnam	Lien, T. Q.; Lan, P. T.; Chuc, N. T. K.; Hoa, N. Q.; Nhung, P. H.; Thoa, N. T. M.; Diwan, V.; Tamhankar, A. J.; St氓lsby Lundborg, C.	2017	Lien 2017	environmental	2013	Vietnam	hospital	Water samples	Escherichia coli	Gentamicin	0.446281	54	121
Antibiotic Resistance and Antibiotic Resistance Genes in Escherichia coli Isolates from Hospital Wastewater in Vietnam	Lien, T. Q.; Lan, P. T.; Chuc, N. T. K.; Hoa, N. Q.; Nhung, P. H.; Thoa, N. T. M.; Diwan, V.; Tamhankar, A. J.; St氓lsby Lundborg, C.	2017	Lien 2017	environmental	2013	Vietnam	hospital	Water samples	Escherichia coli	Imipenem	0.00694444	1	144
Antibiotic Resistance and Antibiotic Resistance Genes in Escherichia coli Isolates from Hospital Wastewater in Vietnam	Lien, T. Q.; Lan, P. T.; Chuc, N. T. K.; Hoa, N. Q.; Nhung, P. H.; Thoa, N. T. M.; Diwan, V.; Tamhankar, A. J.; St氓lsby Lundborg, C.	2017	Lien 2017	environmental	2013	Vietnam	hospital	Water samples	Escherichia coli	Imipenem	0	0	121
Antibiotic Resistance and Antibiotic Resistance Genes in Escherichia coli Isolates from Hospital Wastewater in Vietnam	Lien, T. Q.; Lan, P. T.; Chuc, N. T. K.; Hoa, N. Q.; Nhung, P. H.; Thoa, N. T. M.; Diwan, V.; Tamhankar, A. J.; St氓lsby Lundborg, C.	2017	Lien 2017	environmental	2013	Vietnam	hospital	Water samples	Escherichia coli	Sulfamethoxazole/trimethoprim	0.933884	113	121
Antimicrobial Resistance in Fecal Escherichia coli from Humans and Pigs at Farms at Different Levels of Intensification	Lunha, K.; Leangapichart, T.; Jiwakanon, J.; Angkititrakul, S.; Sunde, M.; J盲rhult, J. D.; Str枚m Hallenberg, G.; Hickman, R. A.; Van Boeckel, T.; Magnusson, U.	2020	Lunha 2020	animal	24 September to 22 December 2018.	Thailand	livestock farms	Fecal/Stool Samples	Escherichia coli	Cefotaxime	0.00875274	4	457
Antimicrobial Resistance in Fecal Escherichia coli from Humans and Pigs at Farms at Different Levels of Intensification	Lunha, K.; Leangapichart, T.; Jiwakanon, J.; Angkititrakul, S.; Sunde, M.; J盲rhult, J. D.; Str枚m Hallenberg, G.; Hickman, R. A.; Van Boeckel, T.; Magnusson, U.	2020	Lunha 2020	animal	24 September to 22 December 2018.	Thailand	livestock farms	Fecal/Stool Samples	Escherichia coli	Cefotaxime	0.01	3	300
Antimicrobial Resistance in Fecal Escherichia coli from Humans and Pigs at Farms at Different Levels of Intensification	Lunha, K.; Leangapichart, T.; Jiwakanon, J.; Angkititrakul, S.; Sunde, M.; J盲rhult, J. D.; Str枚m Hallenberg, G.; Hickman, R. A.; Van Boeckel, T.; Magnusson, U.	2020	Lunha 2020	human	24 September to 22 December 2018.	Thailand	livestock farms	Fecal/Stool Samples	Escherichia coli	Cefotaxime	0.0217391	2	92
Antimicrobial Resistance in Fecal Escherichia coli from Humans and Pigs at Farms at Different Levels of Intensification	Lunha, K.; Leangapichart, T.; Jiwakanon, J.; Angkititrakul, S.; Sunde, M.; J盲rhult, J. D.; Str枚m Hallenberg, G.; Hickman, R. A.; Van Boeckel, T.; Magnusson, U.	2020	Lunha 2020	human	24 September to 22 December 2018.	Thailand	livestock farms	Fecal/Stool Samples	Escherichia coli	Cefotaxime	0.0212766	1	47
Antimicrobial Resistance in Fecal Escherichia coli from Humans and Pigs at Farms at Different Levels of Intensification	Lunha, K.; Leangapichart, T.; Jiwakanon, J.; Angkititrakul, S.; Sunde, M.; J盲rhult, J. D.; Str枚m Hallenberg, G.; Hickman, R. A.; Van Boeckel, T.; Magnusson, U.	2020	Lunha 2020	human	24 September to 22 December 2018.	Thailand	livestock farms	Fecal/Stool Samples	Escherichia coli	Cefotaxime	0.021978	2	91
Antimicrobial Resistance in Fecal Escherichia coli from Humans and Pigs at Farms at Different Levels of Intensification	Lunha, K.; Leangapichart, T.; Jiwakanon, J.; Angkititrakul, S.; Sunde, M.; J盲rhult, J. D.; Str枚m Hallenberg, G.; Hickman, R. A.; Van Boeckel, T.; Magnusson, U.	2020	Lunha 2020	animal	24 September to 22 December 2018.	Thailand	livestock farms	Fecal/Stool Samples	Escherichia coli	Chloramphenicol	0.426696	195	457
Antimicrobial Resistance in Fecal Escherichia coli from Humans and Pigs at Farms at Different Levels of Intensification	Lunha, K.; Leangapichart, T.; Jiwakanon, J.; Angkititrakul, S.; Sunde, M.; J盲rhult, J. D.; Str枚m Hallenberg, G.; Hickman, R. A.; Van Boeckel, T.; Magnusson, U.	2020	Lunha 2020	animal	24 September to 22 December 2018.	Thailand	livestock farms	Fecal/Stool Samples	Escherichia coli	Chloramphenicol	0.26	78	300
Antimicrobial Resistance in Fecal Escherichia coli from Humans and Pigs at Farms at Different Levels of Intensification	Lunha, K.; Leangapichart, T.; Jiwakanon, J.; Angkititrakul, S.; Sunde, M.; J盲rhult, J. D.; Str枚m Hallenberg, G.; Hickman, R. A.; Van Boeckel, T.; Magnusson, U.	2020	Lunha 2020	human	24 September to 22 December 2018.	Thailand	livestock farms	Fecal/Stool Samples	Escherichia coli	Chloramphenicol	0.173913	16	92
Antimicrobial Resistance in Fecal Escherichia coli from Humans and Pigs at Farms at Different Levels of Intensification	Lunha, K.; Leangapichart, T.; Jiwakanon, J.; Angkititrakul, S.; Sunde, M.; J盲rhult, J. D.; Str枚m Hallenberg, G.; Hickman, R. A.; Van Boeckel, T.; Magnusson, U.	2020	Lunha 2020	human	24 September to 22 December 2018.	Thailand	livestock farms	Fecal/Stool Samples	Escherichia coli	Chloramphenicol	0.106383	5	47
Antimicrobial Resistance in Fecal Escherichia coli from Humans and Pigs at Farms at Different Levels of Intensification	Lunha, K.; Leangapichart, T.; Jiwakanon, J.; Angkititrakul, S.; Sunde, M.; J盲rhult, J. D.; Str枚m Hallenberg, G.; Hickman, R. A.; Van Boeckel, T.; Magnusson, U.	2020	Lunha 2020	human	24 September to 22 December 2018.	Thailand	livestock farms	Fecal/Stool Samples	Escherichia coli	Chloramphenicol	0.131868	12	91
Antimicrobial Resistance in Fecal Escherichia coli from Humans and Pigs at Farms at Different Levels of Intensification	Lunha, K.; Leangapichart, T.; Jiwakanon, J.; Angkititrakul, S.; Sunde, M.; J盲rhult, J. D.; Str枚m Hallenberg, G.; Hickman, R. A.; Van Boeckel, T.; Magnusson, U.	2020	Lunha 2020	animal	24 September to 22 December 2018.	Thailand	livestock farms	Fecal/Stool Samples	Escherichia coli	Ciprofloxacin	0.137856	63	457
Antimicrobial Resistance in Fecal Escherichia coli from Humans and Pigs at Farms at Different Levels of Intensification	Lunha, K.; Leangapichart, T.; Jiwakanon, J.; Angkititrakul, S.; Sunde, M.; J盲rhult, J. D.; Str枚m Hallenberg, G.; Hickman, R. A.; Van Boeckel, T.; Magnusson, U.	2020	Lunha 2020	animal	24 September to 22 December 2018.	Thailand	livestock farms	Fecal/Stool Samples	Escherichia coli	Ciprofloxacin	0.116667	35	300
Antimicrobial Resistance in Fecal Escherichia coli from Humans and Pigs at Farms at Different Levels of Intensification	Lunha, K.; Leangapichart, T.; Jiwakanon, J.; Angkititrakul, S.; Sunde, M.; J盲rhult, J. D.; Str枚m Hallenberg, G.; Hickman, R. A.; Van Boeckel, T.; Magnusson, U.	2020	Lunha 2020	human	24 September to 22 December 2018.	Thailand	livestock farms	Fecal/Stool Samples	Escherichia coli	Ciprofloxacin	0.119565	11	92
Antimicrobial Resistance in Fecal Escherichia coli from Humans and Pigs at Farms at Different Levels of Intensification	Lunha, K.; Leangapichart, T.; Jiwakanon, J.; Angkititrakul, S.; Sunde, M.; J盲rhult, J. D.; Str枚m Hallenberg, G.; Hickman, R. A.; Van Boeckel, T.; Magnusson, U.	2020	Lunha 2020	human	24 September to 22 December 2018.	Thailand	livestock farms	Fecal/Stool Samples	Escherichia coli	Ciprofloxacin	0.0851064	4	47
Antimicrobial Resistance in Fecal Escherichia coli from Humans and Pigs at Farms at Different Levels of Intensification	Lunha, K.; Leangapichart, T.; Jiwakanon, J.; Angkititrakul, S.; Sunde, M.; J盲rhult, J. D.; Str枚m Hallenberg, G.; Hickman, R. A.; Van Boeckel, T.; Magnusson, U.	2020	Lunha 2020	human	24 September to 22 December 2018.	Thailand	livestock farms	Fecal/Stool Samples	Escherichia coli	Ciprofloxacin	0.142857	13	91
Antimicrobial Resistance in Fecal Escherichia coli from Humans and Pigs at Farms at Different Levels of Intensification	Lunha, K.; Leangapichart, T.; Jiwakanon, J.; Angkititrakul, S.; Sunde, M.; J盲rhult, J. D.; Str枚m Hallenberg, G.; Hickman, R. A.; Van Boeckel, T.; Magnusson, U.	2020	Lunha 2020	animal	24 September to 22 December 2018.	Thailand	livestock farms	Fecal/Stool Samples	Escherichia coli	Gentamicin	0.0678337	31	457
Antimicrobial Resistance in Fecal Escherichia coli from Humans and Pigs at Farms at Different Levels of Intensification	Lunha, K.; Leangapichart, T.; Jiwakanon, J.; Angkititrakul, S.; Sunde, M.; J盲rhult, J. D.; Str枚m Hallenberg, G.; Hickman, R. A.; Van Boeckel, T.; Magnusson, U.	2020	Lunha 2020	animal	24 September to 22 December 2018.	Thailand	livestock farms	Fecal/Stool Samples	Escherichia coli	Gentamicin	0.0433333	13	300
Antimicrobial Resistance in Fecal Escherichia coli from Humans and Pigs at Farms at Different Levels of Intensification	Lunha, K.; Leangapichart, T.; Jiwakanon, J.; Angkititrakul, S.; Sunde, M.; J盲rhult, J. D.; Str枚m Hallenberg, G.; Hickman, R. A.; Van Boeckel, T.; Magnusson, U.	2020	Lunha 2020	human	24 September to 22 December 2018.	Thailand	livestock farms	Fecal/Stool Samples	Escherichia coli	Gentamicin	0.0326087	3	92
Antimicrobial Resistance in Fecal Escherichia coli from Humans and Pigs at Farms at Different Levels of Intensification	Lunha, K.; Leangapichart, T.; Jiwakanon, J.; Angkititrakul, S.; Sunde, M.; J盲rhult, J. D.; Str枚m Hallenberg, G.; Hickman, R. A.; Van Boeckel, T.; Magnusson, U.	2020	Lunha 2020	human	24 September to 22 December 2018.	Thailand	livestock farms	Fecal/Stool Samples	Escherichia coli	Gentamicin	0.0425532	2	47
Antimicrobial Resistance in Fecal Escherichia coli from Humans and Pigs at Farms at Different Levels of Intensification	Lunha, K.; Leangapichart, T.; Jiwakanon, J.; Angkititrakul, S.; Sunde, M.; J盲rhult, J. D.; Str枚m Hallenberg, G.; Hickman, R. A.; Van Boeckel, T.; Magnusson, U.	2020	Lunha 2020	human	24 September to 22 December 2018.	Thailand	livestock farms	Fecal/Stool Samples	Escherichia coli	Gentamicin	0.043956	4	91
Antimicrobial Resistance in Fecal Escherichia coli from Humans and Pigs at Farms at Different Levels of Intensification	Lunha, K.; Leangapichart, T.; Jiwakanon, J.; Angkititrakul, S.; Sunde, M.; J盲rhult, J. D.; Str枚m Hallenberg, G.; Hickman, R. A.; Van Boeckel, T.; Magnusson, U.	2020	Lunha 2020	animal	24 September to 22 December 2018.	Thailand	livestock farms	Fecal/Stool Samples	Escherichia coli	Meropenem	0	0	457
Antimicrobial Resistance in Fecal Escherichia coli from Humans and Pigs at Farms at Different Levels of Intensification	Lunha, K.; Leangapichart, T.; Jiwakanon, J.; Angkititrakul, S.; Sunde, M.; J盲rhult, J. D.; Str枚m Hallenberg, G.; Hickman, R. A.; Van Boeckel, T.; Magnusson, U.	2020	Lunha 2020	animal	24 September to 22 December 2018.	Thailand	livestock farms	Fecal/Stool Samples	Escherichia coli	Meropenem	0	0	300
Antimicrobial Resistance in Fecal Escherichia coli from Humans and Pigs at Farms at Different Levels of Intensification	Lunha, K.; Leangapichart, T.; Jiwakanon, J.; Angkititrakul, S.; Sunde, M.; J盲rhult, J. D.; Str枚m Hallenberg, G.; Hickman, R. A.; Van Boeckel, T.; Magnusson, U.	2020	Lunha 2020	human	24 September to 22 December 2018.	Thailand	livestock farms	Fecal/Stool Samples	Escherichia coli	Meropenem	0	0	92
Antimicrobial Resistance in Fecal Escherichia coli from Humans and Pigs at Farms at Different Levels of Intensification	Lunha, K.; Leangapichart, T.; Jiwakanon, J.; Angkititrakul, S.; Sunde, M.; J盲rhult, J. D.; Str枚m Hallenberg, G.; Hickman, R. A.; Van Boeckel, T.; Magnusson, U.	2020	Lunha 2020	human	24 September to 22 December 2018.	Thailand	livestock farms	Fecal/Stool Samples	Escherichia coli	Meropenem	0	0	47
Antimicrobial Resistance in Fecal Escherichia coli from Humans and Pigs at Farms at Different Levels of Intensification	Lunha, K.; Leangapichart, T.; Jiwakanon, J.; Angkititrakul, S.; Sunde, M.; J盲rhult, J. D.; Str枚m Hallenberg, G.; Hickman, R. A.; Van Boeckel, T.; Magnusson, U.	2020	Lunha 2020	human	24 September to 22 December 2018.	Thailand	livestock farms	Fecal/Stool Samples	Escherichia coli	Meropenem	0	0	91
Antimicrobial Resistance in Fecal Escherichia coli from Humans and Pigs at Farms at Different Levels of Intensification	Lunha, K.; Leangapichart, T.; Jiwakanon, J.; Angkititrakul, S.; Sunde, M.; J盲rhult, J. D.; Str枚m Hallenberg, G.; Hickman, R. A.; Van Boeckel, T.; Magnusson, U.	2020	Lunha 2020	human	24 September to 22 December 2018.	Thailand	livestock farms	Fecal/Stool Samples	Escherichia coli	Multidrug resistance	0.130435	12	92
Antimicrobial Resistance in Fecal Escherichia coli from Humans and Pigs at Farms at Different Levels of Intensification	Lunha, K.; Leangapichart, T.; Jiwakanon, J.; Angkititrakul, S.; Sunde, M.; J盲rhult, J. D.; Str枚m Hallenberg, G.; Hickman, R. A.; Van Boeckel, T.; Magnusson, U.	2020	Lunha 2020	human	24 September to 22 December 2018.	Thailand	livestock farms	Fecal/Stool Samples	Escherichia coli	Multidrug resistance	0.106383	5	47
Antimicrobial Resistance in Fecal Escherichia coli from Humans and Pigs at Farms at Different Levels of Intensification	Lunha, K.; Leangapichart, T.; Jiwakanon, J.; Angkititrakul, S.; Sunde, M.; J盲rhult, J. D.; Str枚m Hallenberg, G.; Hickman, R. A.; Van Boeckel, T.; Magnusson, U.	2020	Lunha 2020	animal	24 September to 22 December 2018.	Thailand	livestock farms	Fecal/Stool Samples	Escherichia coli	Multidrug resistance	0.280088	128	457
Antimicrobial Resistance in Fecal Escherichia coli from Humans and Pigs at Farms at Different Levels of Intensification	Lunha, K.; Leangapichart, T.; Jiwakanon, J.; Angkititrakul, S.; Sunde, M.; J盲rhult, J. D.; Str枚m Hallenberg, G.; Hickman, R. A.; Van Boeckel, T.; Magnusson, U.	2020	Lunha 2020	animal	24 September to 22 December 2018.	Thailand	livestock farms	Fecal/Stool Samples	Escherichia coli	Multidrug resistance	0.22	66	300
Antimicrobial Resistance in Fecal Escherichia coli from Humans and Pigs at Farms at Different Levels of Intensification	Lunha, K.; Leangapichart, T.; Jiwakanon, J.; Angkititrakul, S.; Sunde, M.; J盲rhult, J. D.; Str枚m Hallenberg, G.; Hickman, R. A.; Van Boeckel, T.; Magnusson, U.	2020	Lunha 2020	human	24 September to 22 December 2018.	Thailand	livestock farms	Fecal/Stool Samples	Escherichia coli	Multidrug resistance	0.131868	12	91
Antimicrobial Resistance in Fecal Escherichia coli from Humans and Pigs at Farms at Different Levels of Intensification	Lunha, K.; Leangapichart, T.; Jiwakanon, J.; Angkititrakul, S.; Sunde, M.; J盲rhult, J. D.; Str枚m Hallenberg, G.; Hickman, R. A.; Van Boeckel, T.; Magnusson, U.	2020	Lunha 2020	human	24 September to 22 December 2018.	Thailand	livestock farms	Fecal/Stool Samples	Escherichia coli	Sulfamethoxazole/trimethoprim	0.173913	16	92
Antimicrobial Resistance in Fecal Escherichia coli from Humans and Pigs at Farms at Different Levels of Intensification	Lunha, K.; Leangapichart, T.; Jiwakanon, J.; Angkititrakul, S.; Sunde, M.; J盲rhult, J. D.; Str枚m Hallenberg, G.; Hickman, R. A.; Van Boeckel, T.; Magnusson, U.	2020	Lunha 2020	human	24 September to 22 December 2018.	Thailand	livestock farms	Fecal/Stool Samples	Escherichia coli	Sulfamethoxazole/trimethoprim	0.297872	14	47
Antimicrobial Resistance in Fecal Escherichia coli from Humans and Pigs at Farms at Different Levels of Intensification	Lunha, K.; Leangapichart, T.; Jiwakanon, J.; Angkititrakul, S.; Sunde, M.; J盲rhult, J. D.; Str枚m Hallenberg, G.; Hickman, R. A.; Van Boeckel, T.; Magnusson, U.	2020	Lunha 2020	animal	24 September to 22 December 2018.	Thailand	livestock farms	Fecal/Stool Samples	Escherichia coli	Sulfamethoxazole/trimethoprim	0.463895	212	457
Antimicrobial Resistance in Fecal Escherichia coli from Humans and Pigs at Farms at Different Levels of Intensification	Lunha, K.; Leangapichart, T.; Jiwakanon, J.; Angkititrakul, S.; Sunde, M.; J盲rhult, J. D.; Str枚m Hallenberg, G.; Hickman, R. A.; Van Boeckel, T.; Magnusson, U.	2020	Lunha 2020	animal	24 September to 22 December 2018.	Thailand	livestock farms	Fecal/Stool Samples	Escherichia coli	Sulfamethoxazole/trimethoprim	0.33	99	300
Antimicrobial Resistance in Fecal Escherichia coli from Humans and Pigs at Farms at Different Levels of Intensification	Lunha, K.; Leangapichart, T.; Jiwakanon, J.; Angkititrakul, S.; Sunde, M.; J盲rhult, J. D.; Str枚m Hallenberg, G.; Hickman, R. A.; Van Boeckel, T.; Magnusson, U.	2020	Lunha 2020	human	24 September to 22 December 2018.	Thailand	livestock farms	Fecal/Stool Samples	Escherichia coli	Sulfamethoxazole/trimethoprim	0.21978	20	91
Antimicrobial Resistance in Fecal Escherichia coli from Humans and Pigs at Farms at Different Levels of Intensification	Lunha, K.; Leangapichart, T.; Jiwakanon, J.; Angkititrakul, S.; Sunde, M.; J盲rhult, J. D.; Str枚m Hallenberg, G.; Hickman, R. A.; Van Boeckel, T.; Magnusson, U.	2020	Lunha 2020	animal	24 September to 22 December 2018.	Thailand	livestock farms	Fecal/Stool Samples	Escherichia coli	Tetracycline	0.52954	242	457
Antimicrobial Resistance in Fecal Escherichia coli from Humans and Pigs at Farms at Different Levels of Intensification	Lunha, K.; Leangapichart, T.; Jiwakanon, J.; Angkititrakul, S.; Sunde, M.; J盲rhult, J. D.; Str枚m Hallenberg, G.; Hickman, R. A.; Van Boeckel, T.; Magnusson, U.	2020	Lunha 2020	animal	24 September to 22 December 2018.	Thailand	livestock farms	Fecal/Stool Samples	Escherichia coli	Tetracycline	0.646667	194	300
Antimicrobial Resistance in Fecal Escherichia coli from Humans and Pigs at Farms at Different Levels of Intensification	Lunha, K.; Leangapichart, T.; Jiwakanon, J.; Angkititrakul, S.; Sunde, M.; J盲rhult, J. D.; Str枚m Hallenberg, G.; Hickman, R. A.; Van Boeckel, T.; Magnusson, U.	2020	Lunha 2020	human	24 September to 22 December 2018.	Thailand	livestock farms	Fecal/Stool Samples	Escherichia coli	Tetracycline	0.391304	36	92
Antimicrobial Resistance in Fecal Escherichia coli from Humans and Pigs at Farms at Different Levels of Intensification	Lunha, K.; Leangapichart, T.; Jiwakanon, J.; Angkititrakul, S.; Sunde, M.; J盲rhult, J. D.; Str枚m Hallenberg, G.; Hickman, R. A.; Van Boeckel, T.; Magnusson, U.	2020	Lunha 2020	human	24 September to 22 December 2018.	Thailand	livestock farms	Fecal/Stool Samples	Escherichia coli	Tetracycline	0.382979	18	47
Antimicrobial Resistance in Fecal Escherichia coli from Humans and Pigs at Farms at Different Levels of Intensification	Lunha, K.; Leangapichart, T.; Jiwakanon, J.; Angkititrakul, S.; Sunde, M.; J盲rhult, J. D.; Str枚m Hallenberg, G.; Hickman, R. A.; Van Boeckel, T.; Magnusson, U.	2020	Lunha 2020	human	24 September to 22 December 2018.	Thailand	livestock farms	Fecal/Stool Samples	Escherichia coli	Tetracycline	0.483516	44	91
Antimicrobial resistance in urine and skin isolates in Timor-Leste	Marr, I.; Sarmento, N.; O'Brien, M.; Lee, K.; Gusmao, C.; de Castro, G.; Janson, S.; Tong, S. Y. C.; Baird, R. W.; Francis, J. R.	2018	Marr 2018	human	10th March and 20th June 2017	Timor-Leste	hospital	Clinical samples	Enterobacter spp.	Amikacin	0	0	12
Antimicrobial resistance in urine and skin isolates in Timor-Leste	Marr, I.; Sarmento, N.; O'Brien, M.; Lee, K.; Gusmao, C.; de Castro, G.; Janson, S.; Tong, S. Y. C.; Baird, R. W.; Francis, J. R.	2018	Marr 2018	human	10th March and 20th June 2017	Timor-Leste	hospital	Clinical samples	Escherichia coli	Amikacin	0.0204082	1	49
Antimicrobial resistance in urine and skin isolates in Timor-Leste	Marr, I.; Sarmento, N.; O'Brien, M.; Lee, K.; Gusmao, C.; de Castro, G.; Janson, S.; Tong, S. Y. C.; Baird, R. W.; Francis, J. R.	2018	Marr 2018	human	10th March and 20th June 2017	Timor-Leste	hospital	Clinical samples	Klebsiella pneumoniae	Amikacin	0	0	18
Antimicrobial resistance in urine and skin isolates in Timor-Leste	Marr, I.; Sarmento, N.; O'Brien, M.; Lee, K.; Gusmao, C.; de Castro, G.; Janson, S.; Tong, S. Y. C.; Baird, R. W.; Francis, J. R.	2018	Marr 2018	human	10th March and 20th June 2017	Timor-Leste	hospital	Clinical samples	Escherichia coli	Amoxicillin/clavulanic acid	0.408163	20	49
Antimicrobial resistance in urine and skin isolates in Timor-Leste	Marr, I.; Sarmento, N.; O'Brien, M.; Lee, K.; Gusmao, C.; de Castro, G.; Janson, S.; Tong, S. Y. C.; Baird, R. W.; Francis, J. R.	2018	Marr 2018	human	10th March and 20th June 2017	Timor-Leste	hospital	Clinical samples	Klebsiella pneumoniae	Amoxicillin/clavulanic acid	0.444444	8	18
Antimicrobial resistance in urine and skin isolates in Timor-Leste	Marr, I.; Sarmento, N.; O'Brien, M.; Lee, K.; Gusmao, C.; de Castro, G.; Janson, S.; Tong, S. Y. C.; Baird, R. W.; Francis, J. R.	2018	Marr 2018	human	10th March and 20th June 2017	Timor-Leste	hospital	Clinical samples	Escherichia coli	Amoxycillin	0.857143	42	49
Antimicrobial resistance in urine and skin isolates in Timor-Leste	Marr, I.; Sarmento, N.; O'Brien, M.; Lee, K.; Gusmao, C.; de Castro, G.; Janson, S.; Tong, S. Y. C.; Baird, R. W.; Francis, J. R.	2018	Marr 2018	human	10th March and 20th June 2017	Timor-Leste	hospital	Clinical samples	Escherichia coli	Cefazolin	0.510204	25	49
Antimicrobial resistance in urine and skin isolates in Timor-Leste	Marr, I.; Sarmento, N.; O'Brien, M.; Lee, K.; Gusmao, C.; de Castro, G.; Janson, S.; Tong, S. Y. C.; Baird, R. W.; Francis, J. R.	2018	Marr 2018	human	10th March and 20th June 2017	Timor-Leste	hospital	Clinical samples	Klebsiella pneumoniae	Cefazolin	0.611111	11	18
Antimicrobial resistance in urine and skin isolates in Timor-Leste	Marr, I.; Sarmento, N.; O'Brien, M.; Lee, K.; Gusmao, C.; de Castro, G.; Janson, S.; Tong, S. Y. C.; Baird, R. W.; Francis, J. R.	2018	Marr 2018	human	10th March and 20th June 2017	Timor-Leste	hospital	Clinical samples	Enterobacter spp.	Ceftazidime	0.25	3	12
Antimicrobial resistance in urine and skin isolates in Timor-Leste	Marr, I.; Sarmento, N.; O'Brien, M.; Lee, K.; Gusmao, C.; de Castro, G.; Janson, S.; Tong, S. Y. C.; Baird, R. W.; Francis, J. R.	2018	Marr 2018	human	10th March and 20th June 2017	Timor-Leste	hospital	Clinical samples	Escherichia coli	Ceftazidime	0.183673	9	49
Antimicrobial resistance in urine and skin isolates in Timor-Leste	Marr, I.; Sarmento, N.; O'Brien, M.; Lee, K.; Gusmao, C.; de Castro, G.; Janson, S.; Tong, S. Y. C.; Baird, R. W.; Francis, J. R.	2018	Marr 2018	human	10th March and 20th June 2017	Timor-Leste	hospital	Clinical samples	Klebsiella pneumoniae	Ceftazidime	0.444444	8	18
Antimicrobial resistance in urine and skin isolates in Timor-Leste	Marr, I.; Sarmento, N.; O'Brien, M.; Lee, K.; Gusmao, C.; de Castro, G.; Janson, S.; Tong, S. Y. C.; Baird, R. W.; Francis, J. R.	2018	Marr 2018	human	10th March and 20th June 2017	Timor-Leste	hospital	Clinical samples	Escherichia coli	Ceftriaxone	0.306122	15	49
Antimicrobial resistance in urine and skin isolates in Timor-Leste	Marr, I.; Sarmento, N.; O'Brien, M.; Lee, K.; Gusmao, C.; de Castro, G.; Janson, S.; Tong, S. Y. C.; Baird, R. W.; Francis, J. R.	2018	Marr 2018	human	10th March and 20th June 2017	Timor-Leste	hospital	Clinical samples	Klebsiella pneumoniae	Ceftriaxone	0.611111	11	18
Antimicrobial resistance in urine and skin isolates in Timor-Leste	Marr, I.; Sarmento, N.; O'Brien, M.; Lee, K.; Gusmao, C.; de Castro, G.; Janson, S.; Tong, S. Y. C.; Baird, R. W.; Francis, J. R.	2018	Marr 2018	human	10th March and 20th June 2017	Timor-Leste	hospital	Clinical samples	Enterobacter spp.	Ciprofloxacin	0	0	12
Antimicrobial resistance in urine and skin isolates in Timor-Leste	Marr, I.; Sarmento, N.; O'Brien, M.; Lee, K.; Gusmao, C.; de Castro, G.; Janson, S.; Tong, S. Y. C.; Baird, R. W.; Francis, J. R.	2018	Marr 2018	human	10th March and 20th June 2017	Timor-Leste	hospital	Clinical samples	Escherichia coli	Ciprofloxacin	0.428571	21	49
Antimicrobial resistance in urine and skin isolates in Timor-Leste	Marr, I.; Sarmento, N.; O'Brien, M.; Lee, K.; Gusmao, C.; de Castro, G.; Janson, S.; Tong, S. Y. C.; Baird, R. W.; Francis, J. R.	2018	Marr 2018	human	10th March and 20th June 2017	Timor-Leste	hospital	Clinical samples	Klebsiella pneumoniae	Ciprofloxacin	0.333333	6	18
Antimicrobial resistance in urine and skin isolates in Timor-Leste	Marr, I.; Sarmento, N.; O'Brien, M.; Lee, K.; Gusmao, C.; de Castro, G.; Janson, S.; Tong, S. Y. C.; Baird, R. W.; Francis, J. R.	2018	Marr 2018	human	10th March and 20th June 2017	Timor-Leste	hospital	Clinical samples	Enterobacter spp.	Gentamicin	0.25	3	12
Antimicrobial resistance in urine and skin isolates in Timor-Leste	Marr, I.; Sarmento, N.; O'Brien, M.; Lee, K.; Gusmao, C.; de Castro, G.; Janson, S.; Tong, S. Y. C.; Baird, R. W.; Francis, J. R.	2018	Marr 2018	human	10th March and 20th June 2017	Timor-Leste	hospital	Clinical samples	Escherichia coli	Gentamicin	0.122449	6	49
Antimicrobial resistance in urine and skin isolates in Timor-Leste	Marr, I.; Sarmento, N.; O'Brien, M.; Lee, K.; Gusmao, C.; de Castro, G.; Janson, S.; Tong, S. Y. C.; Baird, R. W.; Francis, J. R.	2018	Marr 2018	human	10th March and 20th June 2017	Timor-Leste	hospital	Clinical samples	Klebsiella pneumoniae	Gentamicin	0.444444	8	18
Antimicrobial resistance in urine and skin isolates in Timor-Leste	Marr, I.; Sarmento, N.; O'Brien, M.; Lee, K.; Gusmao, C.; de Castro, G.; Janson, S.; Tong, S. Y. C.; Baird, R. W.; Francis, J. R.	2018	Marr 2018	human	10th March and 20th June 2017	Timor-Leste	hospital	Clinical samples	Enterobacter spp.	Meropenem	0	0	12
Antimicrobial resistance in urine and skin isolates in Timor-Leste	Marr, I.; Sarmento, N.; O'Brien, M.; Lee, K.; Gusmao, C.; de Castro, G.; Janson, S.; Tong, S. Y. C.; Baird, R. W.; Francis, J. R.	2018	Marr 2018	human	10th March and 20th June 2017	Timor-Leste	hospital	Clinical samples	Escherichia coli	Meropenem	0	0	49
Antimicrobial resistance in urine and skin isolates in Timor-Leste	Marr, I.; Sarmento, N.; O'Brien, M.; Lee, K.; Gusmao, C.; de Castro, G.; Janson, S.; Tong, S. Y. C.; Baird, R. W.; Francis, J. R.	2018	Marr 2018	human	10th March and 20th June 2017	Timor-Leste	hospital	Clinical samples	Klebsiella pneumoniae	Meropenem	0	0	18
Antimicrobial resistance in urine and skin isolates in Timor-Leste	Marr, I.; Sarmento, N.; O'Brien, M.; Lee, K.; Gusmao, C.; de Castro, G.; Janson, S.; Tong, S. Y. C.; Baird, R. W.; Francis, J. R.	2018	Marr 2018	human	10th March and 20th June 2017	Timor-Leste	hospital	Clinical samples	Enterobacter spp.	Piperacillin/Tazobactam	0.25	3	12
Antimicrobial resistance in urine and skin isolates in Timor-Leste	Marr, I.; Sarmento, N.; O'Brien, M.; Lee, K.; Gusmao, C.; de Castro, G.; Janson, S.; Tong, S. Y. C.; Baird, R. W.; Francis, J. R.	2018	Marr 2018	human	10th March and 20th June 2017	Timor-Leste	hospital	Clinical samples	Escherichia coli	Piperacillin/Tazobactam	0.183673	9	49
Antimicrobial resistance in urine and skin isolates in Timor-Leste	Marr, I.; Sarmento, N.; O'Brien, M.; Lee, K.; Gusmao, C.; de Castro, G.; Janson, S.; Tong, S. Y. C.; Baird, R. W.; Francis, J. R.	2018	Marr 2018	human	10th March and 20th June 2017	Timor-Leste	hospital	Clinical samples	Klebsiella pneumoniae	Piperacillin/Tazobactam	0.222222	4	18
Antimicrobial resistance in urine and skin isolates in Timor-Leste	Marr, I.; Sarmento, N.; O'Brien, M.; Lee, K.; Gusmao, C.; de Castro, G.; Janson, S.; Tong, S. Y. C.; Baird, R. W.; Francis, J. R.	2018	Marr 2018	human	10th March and 20th June 2017	Timor-Leste	hospital	Clinical samples	Enterobacter spp.	Sulfamethoxazole/trimethoprim	0.583333	7	12
Antimicrobial resistance in urine and skin isolates in Timor-Leste	Marr, I.; Sarmento, N.; O'Brien, M.; Lee, K.; Gusmao, C.; de Castro, G.; Janson, S.; Tong, S. Y. C.; Baird, R. W.; Francis, J. R.	2018	Marr 2018	human	10th March and 20th June 2017	Timor-Leste	hospital	Clinical samples	Escherichia coli	Sulfamethoxazole/trimethoprim	0.77551	38	49
Antimicrobial resistance in urine and skin isolates in Timor-Leste	Marr, I.; Sarmento, N.; O'Brien, M.; Lee, K.; Gusmao, C.; de Castro, G.; Janson, S.; Tong, S. Y. C.; Baird, R. W.; Francis, J. R.	2018	Marr 2018	human	10th March and 20th June 2017	Timor-Leste	hospital	Clinical samples	Klebsiella pneumoniae	Sulfamethoxazole/trimethoprim	0.722222	13	18
Antimicrobial resistance in fecal Escherichia coli from different pig production systems	Mitchaothai, J.; Srikijkasemwat, K.	2022	Mitchaothai 2022	animal	from March 2019 to April 2020	Thailand	livestock farms	Rectal swabs	Escherichia coli	Ampicillin	0.9818	107.998	110
Antimicrobial resistance in fecal Escherichia coli from different pig production systems	Mitchaothai, J.; Srikijkasemwat, K.	2022	Mitchaothai 2022	animal	from March 2019 to April 2020	Thailand	livestock farms	Rectal swabs	Escherichia coli	Ampicillin	0.9333	97.9965	105
Antimicrobial resistance in fecal Escherichia coli from different pig production systems	Mitchaothai, J.; Srikijkasemwat, K.	2022	Mitchaothai 2022	animal	from March 2019 to April 2020	Thailand	livestock farms	Rectal swabs	Escherichia coli	Colistin	0.0182	2.002	110
Antimicrobial resistance in fecal Escherichia coli from different pig production systems	Mitchaothai, J.; Srikijkasemwat, K.	2022	Mitchaothai 2022	animal	from March 2019 to April 2020	Thailand	livestock farms	Rectal swabs	Escherichia coli	Colistin	0	0	105
Antimicrobial resistance in fecal Escherichia coli from different pig production systems	Mitchaothai, J.; Srikijkasemwat, K.	2022	Mitchaothai 2022	animal	from March 2019 to April 2020	Thailand	livestock farms	Rectal swabs	Escherichia coli	Doxycycline	0.5727	62.997	110
Antimicrobial resistance in fecal Escherichia coli from different pig production systems	Mitchaothai, J.; Srikijkasemwat, K.	2022	Mitchaothai 2022	animal	from March 2019 to April 2020	Thailand	livestock farms	Rectal swabs	Escherichia coli	Doxycycline	0.581	61.005	105
Antimicrobial resistance in fecal Escherichia coli from different pig production systems	Mitchaothai, J.; Srikijkasemwat, K.	2022	Mitchaothai 2022	animal	from March 2019 to April 2020	Thailand	livestock farms	Rectal swabs	Escherichia coli	Enrofoxacin	0	0	110
Antimicrobial resistance in fecal Escherichia coli from different pig production systems	Mitchaothai, J.; Srikijkasemwat, K.	2022	Mitchaothai 2022	animal	from March 2019 to April 2020	Thailand	livestock farms	Rectal swabs	Escherichia coli	Enrofoxacin	0.0095	0.9975	105
Antimicrobial resistance in fecal Escherichia coli from different pig production systems	Mitchaothai, J.; Srikijkasemwat, K.	2022	Mitchaothai 2022	animal	from March 2019 to April 2020	Thailand	livestock farms	Rectal swabs	Escherichia coli	Gentamicin	0.2364	26.004	110
Antimicrobial resistance in fecal Escherichia coli from different pig production systems	Mitchaothai, J.; Srikijkasemwat, K.	2022	Mitchaothai 2022	animal	from March 2019 to April 2020	Thailand	livestock farms	Rectal swabs	Escherichia coli	Gentamicin	0.0667	7.0035	105
Antimicrobial resistance in fecal Escherichia coli from different pig production systems	Mitchaothai, J.; Srikijkasemwat, K.	2022	Mitchaothai 2022	animal	from March 2019 to April 2020	Thailand	livestock farms	Rectal swabs	Escherichia coli	Kanamycin	0.1545	16.995	110
Antimicrobial resistance in fecal Escherichia coli from different pig production systems	Mitchaothai, J.; Srikijkasemwat, K.	2022	Mitchaothai 2022	animal	from March 2019 to April 2020	Thailand	livestock farms	Rectal swabs	Escherichia coli	Kanamycin	0.1333	13.9965	105
Antimicrobial resistance in fecal Escherichia coli from different pig production systems	Mitchaothai, J.; Srikijkasemwat, K.	2022	Mitchaothai 2022	animal	from March 2019 to April 2020	Thailand	livestock farms	Rectal swabs	Escherichia coli	Neomycin	0.3	33	110
Antimicrobial resistance in fecal Escherichia coli from different pig production systems	Mitchaothai, J.; Srikijkasemwat, K.	2022	Mitchaothai 2022	animal	from March 2019 to April 2020	Thailand	livestock farms	Rectal swabs	Escherichia coli	Neomycin	0.1524	16.002	105
Antimicrobial resistance in fecal Escherichia coli from different pig production systems	Mitchaothai, J.; Srikijkasemwat, K.	2022	Mitchaothai 2022	animal	from March 2019 to April 2020	Thailand	livestock farms	Rectal swabs	Escherichia coli	Sulfamethoxazole/trimethoprim	0.8	88	110
Antimicrobial resistance in fecal Escherichia coli from different pig production systems	Mitchaothai, J.; Srikijkasemwat, K.	2022	Mitchaothai 2022	animal	from March 2019 to April 2020	Thailand	livestock farms	Rectal swabs	Escherichia coli	Sulfamethoxazole/trimethoprim	0.5714	59.997	105
Molecular characterization of extended-spectrum 尾-lactamase-producing Klebsiella pneumoniae from a Malaysian hospital	Mobasseri, G.; Thong, K. L.; Rajasekaram, G.; Teh, C. S. J.	2020	Mobasseri 2020	human	Sep - Dec 2014	Malaysia	hospital	Clinical samples	Klebsiella pneumoniae	Amoxicillin/clavulanic acid		19	97
Molecular characterization of extended-spectrum 尾-lactamase-producing Klebsiella pneumoniae from a Malaysian hospital	Mobasseri, G.; Thong, K. L.; Rajasekaram, G.; Teh, C. S. J.	2020	Mobasseri 2020	human	Sep - Dec 2014	Malaysia	hospital	Clinical samples	Klebsiella pneumoniae	Ampicillin		81	97
Molecular characterization of extended-spectrum 尾-lactamase-producing Klebsiella pneumoniae from a Malaysian hospital	Mobasseri, G.; Thong, K. L.; Rajasekaram, G.; Teh, C. S. J.	2020	Mobasseri 2020	human	Sep - Dec 2014	Malaysia	hospital	Clinical samples	Klebsiella pneumoniae	Aztreonam		27	97
Molecular characterization of extended-spectrum 尾-lactamase-producing Klebsiella pneumoniae from a Malaysian hospital	Mobasseri, G.; Thong, K. L.; Rajasekaram, G.; Teh, C. S. J.	2020	Mobasseri 2020	human	Sep - Dec 2014	Malaysia	hospital	Clinical samples	Klebsiella pneumoniae	Cefixime		29	97
Molecular characterization of extended-spectrum 尾-lactamase-producing Klebsiella pneumoniae from a Malaysian hospital	Mobasseri, G.; Thong, K. L.; Rajasekaram, G.; Teh, C. S. J.	2020	Mobasseri 2020	human	Sep - Dec 2014	Malaysia	hospital	Clinical samples	Klebsiella pneumoniae	Cefoperazone		27	97
Molecular characterization of extended-spectrum 尾-lactamase-producing Klebsiella pneumoniae from a Malaysian hospital	Mobasseri, G.; Thong, K. L.; Rajasekaram, G.; Teh, C. S. J.	2020	Mobasseri 2020	human	Sep - Dec 2014	Malaysia	hospital	Clinical samples	Klebsiella pneumoniae	Cefotaxime		31	97
Molecular characterization of extended-spectrum 尾-lactamase-producing Klebsiella pneumoniae from a Malaysian hospital	Mobasseri, G.; Thong, K. L.; Rajasekaram, G.; Teh, C. S. J.	2020	Mobasseri 2020	human	Sep - Dec 2014	Malaysia	hospital	Clinical samples	Klebsiella pneumoniae	Ceftazidime		25	97
Molecular characterization of extended-spectrum 尾-lactamase-producing Klebsiella pneumoniae from a Malaysian hospital	Mobasseri, G.; Thong, K. L.; Rajasekaram, G.; Teh, C. S. J.	2020	Mobasseri 2020	human	Sep - Dec 2014	Malaysia	hospital	Clinical samples	Klebsiella pneumoniae	Ciprofloxacin		7	97
Molecular characterization of extended-spectrum 尾-lactamase-producing Klebsiella pneumoniae from a Malaysian hospital	Mobasseri, G.; Thong, K. L.; Rajasekaram, G.; Teh, C. S. J.	2020	Mobasseri 2020	human	Sep - Dec 2014	Malaysia	hospital	Clinical samples	Klebsiella pneumoniae	Colistin		1	97
Molecular characterization of extended-spectrum 尾-lactamase-producing Klebsiella pneumoniae from a Malaysian hospital	Mobasseri, G.; Thong, K. L.; Rajasekaram, G.; Teh, C. S. J.	2020	Mobasseri 2020	human	Sep - Dec 2014	Malaysia	hospital	Clinical samples	Klebsiella pneumoniae	Gentamicin		11	97
Molecular characterization of extended-spectrum 尾-lactamase-producing Klebsiella pneumoniae from a Malaysian hospital	Mobasseri, G.; Thong, K. L.; Rajasekaram, G.; Teh, C. S. J.	2020	Mobasseri 2020	human	Sep - Dec 2014	Malaysia	hospital	Clinical samples	Klebsiella pneumoniae	Imipenem		2	97
Molecular characterization of extended-spectrum 尾-lactamase-producing Klebsiella pneumoniae from a Malaysian hospital	Mobasseri, G.; Thong, K. L.; Rajasekaram, G.; Teh, C. S. J.	2020	Mobasseri 2020	human	Sep - Dec 2014	Malaysia	hospital	Clinical samples	Klebsiella pneumoniae	Meropenem		6	97
Molecular characterization of extended-spectrum 尾-lactamase-producing Klebsiella pneumoniae from a Malaysian hospital	Mobasseri, G.; Thong, K. L.; Rajasekaram, G.; Teh, C. S. J.	2020	Mobasseri 2020	human	Sep - Dec 2014	Malaysia	hospital	Clinical samples	Klebsiella pneumoniae	Sulbactam/Cefoperazone		8	97
Molecular characterization of extended-spectrum 尾-lactamase-producing Klebsiella pneumoniae from a Malaysian hospital	Mobasseri, G.; Thong, K. L.; Rajasekaram, G.; Teh, C. S. J.	2020	Mobasseri 2020	human	Sep - Dec 2014	Malaysia	hospital	Clinical samples	Klebsiella pneumoniae	Tazobactam		11	97
Molecular characterization of extended-spectrum 尾-lactamase-producing Klebsiella pneumoniae from a Malaysian hospital	Mobasseri, G.; Thong, K. L.; Rajasekaram, G.; Teh, C. S. J.	2020	Mobasseri 2020	human	Sep - Dec 2014	Malaysia	hospital	Clinical samples	Klebsiella pneumoniae	Tetracycline		30	97
Antimicrobial resistance and molecular characterization of Escherichia coli isolated from bovine mastitis samples in Nghe An province, Vietnam	My, T. T.; Thien, L. V.; Manh, V. D.; My, B. T. P.; Lan, D. T. M.; Binh, D. X.; Duc, V. M.	2023	My 2023	animal	Mar - Sep 2022	Vietnam	livestock farms	Animal samples	Escherichia coli	Amoxicillin	0.14	7	50
Antimicrobial resistance and molecular characterization of Escherichia coli isolated from bovine mastitis samples in Nghe An province, Vietnam	My, T. T.; Thien, L. V.; Manh, V. D.; My, B. T. P.; Lan, D. T. M.; Binh, D. X.; Duc, V. M.	2023	My 2023	animal	Mar - Sep 2022	Vietnam	livestock farms	Animal samples	Escherichia coli	Ampicillin	0.14	7	50
Antimicrobial resistance and molecular characterization of Escherichia coli isolated from bovine mastitis samples in Nghe An province, Vietnam	My, T. T.; Thien, L. V.; Manh, V. D.; My, B. T. P.; Lan, D. T. M.; Binh, D. X.; Duc, V. M.	2023	My 2023	animal	Mar - Sep 2022	Vietnam	livestock farms	Animal samples	Escherichia coli	Ceftiofur	0.04	2	50
Antimicrobial resistance and molecular characterization of Escherichia coli isolated from bovine mastitis samples in Nghe An province, Vietnam	My, T. T.; Thien, L. V.; Manh, V. D.; My, B. T. P.; Lan, D. T. M.; Binh, D. X.; Duc, V. M.	2023	My 2023	animal	Mar - Sep 2022	Vietnam	livestock farms	Animal samples	Escherichia coli	Ciprofloxacin	0.04	2	50
Antimicrobial resistance and molecular characterization of Escherichia coli isolated from bovine mastitis samples in Nghe An province, Vietnam	My, T. T.; Thien, L. V.; Manh, V. D.; My, B. T. P.; Lan, D. T. M.; Binh, D. X.; Duc, V. M.	2023	My 2023	animal	Mar - Sep 2022	Vietnam	livestock farms	Animal samples	Escherichia coli	Colistin	0.14	7	50
Antimicrobial resistance and molecular characterization of Escherichia coli isolated from bovine mastitis samples in Nghe An province, Vietnam	My, T. T.; Thien, L. V.; Manh, V. D.; My, B. T. P.; Lan, D. T. M.; Binh, D. X.; Duc, V. M.	2023	My 2023	animal	Mar - Sep 2022	Vietnam	livestock farms	Animal samples	Escherichia coli	Enrofoxacin	0.02	1	50
Antimicrobial resistance and molecular characterization of Escherichia coli isolated from bovine mastitis samples in Nghe An province, Vietnam	My, T. T.; Thien, L. V.; Manh, V. D.; My, B. T. P.; Lan, D. T. M.; Binh, D. X.; Duc, V. M.	2023	My 2023	animal	Mar - Sep 2022	Vietnam	livestock farms	Animal samples	Escherichia coli	Florfenicol	0.04	2	50
Antimicrobial resistance and molecular characterization of Escherichia coli isolated from bovine mastitis samples in Nghe An province, Vietnam	My, T. T.; Thien, L. V.; Manh, V. D.; My, B. T. P.; Lan, D. T. M.; Binh, D. X.; Duc, V. M.	2023	My 2023	animal	Mar - Sep 2022	Vietnam	livestock farms	Animal samples	Escherichia coli	Gentamicin	0	0	50
Antimicrobial resistance and molecular characterization of Escherichia coli isolated from bovine mastitis samples in Nghe An province, Vietnam	My, T. T.; Thien, L. V.; Manh, V. D.; My, B. T. P.; Lan, D. T. M.; Binh, D. X.; Duc, V. M.	2023	My 2023	animal	Mar - Sep 2022	Vietnam	livestock farms	Animal samples	Escherichia coli	Imipenem	0.02	1	50
Antimicrobial resistance and molecular characterization of Escherichia coli isolated from bovine mastitis samples in Nghe An province, Vietnam	My, T. T.; Thien, L. V.; Manh, V. D.; My, B. T. P.; Lan, D. T. M.; Binh, D. X.; Duc, V. M.	2023	My 2023	animal	Mar - Sep 2022	Vietnam	livestock farms	Animal samples	Escherichia coli	Lincomycin	1	50	50
Antimicrobial resistance and molecular characterization of Escherichia coli isolated from bovine mastitis samples in Nghe An province, Vietnam	My, T. T.; Thien, L. V.; Manh, V. D.; My, B. T. P.; Lan, D. T. M.; Binh, D. X.; Duc, V. M.	2023	My 2023	animal	Mar - Sep 2022	Vietnam	livestock farms	Animal samples	Escherichia coli	Nalidixic acid	0.02	1	50
Antimicrobial resistance and molecular characterization of Escherichia coli isolated from bovine mastitis samples in Nghe An province, Vietnam	My, T. T.; Thien, L. V.; Manh, V. D.; My, B. T. P.; Lan, D. T. M.; Binh, D. X.; Duc, V. M.	2023	My 2023	animal	Mar - Sep 2022	Vietnam	livestock farms	Animal samples	Escherichia coli	Piperacillin	0.14	7	50
Antimicrobial resistance and molecular characterization of Escherichia coli isolated from bovine mastitis samples in Nghe An province, Vietnam	My, T. T.; Thien, L. V.; Manh, V. D.; My, B. T. P.; Lan, D. T. M.; Binh, D. X.; Duc, V. M.	2023	My 2023	animal	Mar - Sep 2022	Vietnam	livestock farms	Animal samples	Escherichia coli	Polymyxin	0.32	16	50
Antimicrobial resistance and molecular characterization of Escherichia coli isolated from bovine mastitis samples in Nghe An province, Vietnam	My, T. T.; Thien, L. V.; Manh, V. D.; My, B. T. P.; Lan, D. T. M.; Binh, D. X.; Duc, V. M.	2023	My 2023	animal	Mar - Sep 2022	Vietnam	livestock farms	Animal samples	Escherichia coli	Streptomycin	0.28	14	50
Antimicrobial resistance and molecular characterization of Escherichia coli isolated from bovine mastitis samples in Nghe An province, Vietnam	My, T. T.; Thien, L. V.; Manh, V. D.; My, B. T. P.; Lan, D. T. M.; Binh, D. X.; Duc, V. M.	2023	My 2023	animal	Mar - Sep 2022	Vietnam	livestock farms	Animal samples	Escherichia coli	Sulfadiazine	0.9	45	50
Antimicrobial resistance and molecular characterization of Escherichia coli isolated from bovine mastitis samples in Nghe An province, Vietnam	My, T. T.; Thien, L. V.; Manh, V. D.; My, B. T. P.; Lan, D. T. M.; Binh, D. X.; Duc, V. M.	2023	My 2023	animal	Mar - Sep 2022	Vietnam	livestock farms	Animal samples	Escherichia coli	Sulfamethoxazole	0.9	45	50
Antimicrobial resistance and molecular characterization of Escherichia coli isolated from bovine mastitis samples in Nghe An province, Vietnam	My, T. T.; Thien, L. V.; Manh, V. D.; My, B. T. P.; Lan, D. T. M.; Binh, D. X.; Duc, V. M.	2023	My 2023	animal	Mar - Sep 2022	Vietnam	livestock farms	Animal samples	Escherichia coli	Sulfamethoxazole/trimethoprim	0.1	5	50
Antimicrobial resistance and molecular characterization of Escherichia coli isolated from bovine mastitis samples in Nghe An province, Vietnam	My, T. T.; Thien, L. V.; Manh, V. D.; My, B. T. P.; Lan, D. T. M.; Binh, D. X.; Duc, V. M.	2023	My 2023	animal	Mar - Sep 2022	Vietnam	livestock farms	Animal samples	Escherichia coli	Tetracycline	0.32	16	50
Antimicrobial resistance and molecular characterization of Escherichia coli isolated from bovine mastitis samples in Nghe An province, Vietnam	My, T. T.; Thien, L. V.; Manh, V. D.; My, B. T. P.; Lan, D. T. M.; Binh, D. X.; Duc, V. M.	2023	My 2023	animal	Mar - Sep 2022	Vietnam	livestock farms	Animal samples	Escherichia coli	Trimethoprim	0.1	5	50
A prospective study of bloodstream infections among febrile adolescents and adults attending Yangon General Hospital, Yangon, Myanmar	Myat, T. O.; Oo, K. M.; Mone, H. K.; Htike, W. W.; Biswas, A.; Hannaway, R. F.; Murdoch, D. R.; Ussher, J. E.; Crump, J. A.	2020	Myat 2020	human	Oct 2015 - Oct 2016	Myanmar	hospital	Clinical samples	Escherichia coli	Amikacin	0.1	2	20
A prospective study of bloodstream infections among febrile adolescents and adults attending Yangon General Hospital, Yangon, Myanmar	Myat, T. O.; Oo, K. M.; Mone, H. K.; Htike, W. W.; Biswas, A.; Hannaway, R. F.; Murdoch, D. R.; Ussher, J. E.; Crump, J. A.	2020	Myat 2020	human	Oct 2015 - Oct 2016	Myanmar	hospital	Clinical samples	Klebsiella pneumoniae	Amikacin	0.142857	1	7
A prospective study of bloodstream infections among febrile adolescents and adults attending Yangon General Hospital, Yangon, Myanmar	Myat, T. O.; Oo, K. M.; Mone, H. K.; Htike, W. W.; Biswas, A.; Hannaway, R. F.; Murdoch, D. R.; Ussher, J. E.; Crump, J. A.	2020	Myat 2020	human	Oct 2015 - Oct 2016	Myanmar	hospital	Clinical samples	Salmonella spp.	Amikacin	0	0	33
A prospective study of bloodstream infections among febrile adolescents and adults attending Yangon General Hospital, Yangon, Myanmar	Myat, T. O.; Oo, K. M.; Mone, H. K.; Htike, W. W.; Biswas, A.; Hannaway, R. F.; Murdoch, D. R.; Ussher, J. E.; Crump, J. A.	2020	Myat 2020	human	Oct 2015 - Oct 2016	Myanmar	hospital	Clinical samples	Salmonella spp.	Amikacin	0	0	10
A prospective study of bloodstream infections among febrile adolescents and adults attending Yangon General Hospital, Yangon, Myanmar	Myat, T. O.; Oo, K. M.; Mone, H. K.; Htike, W. W.; Biswas, A.; Hannaway, R. F.; Murdoch, D. R.; Ussher, J. E.; Crump, J. A.	2020	Myat 2020	human	Oct 2015 - Oct 2016	Myanmar	hospital	Clinical samples	Escherichia coli	Amoxicillin/clavulanic acid	0.95	19	20
A prospective study of bloodstream infections among febrile adolescents and adults attending Yangon General Hospital, Yangon, Myanmar	Myat, T. O.; Oo, K. M.; Mone, H. K.; Htike, W. W.; Biswas, A.; Hannaway, R. F.; Murdoch, D. R.; Ussher, J. E.; Crump, J. A.	2020	Myat 2020	human	Oct 2015 - Oct 2016	Myanmar	hospital	Clinical samples	Klebsiella pneumoniae	Amoxicillin/clavulanic acid	0.428571	3	7
A prospective study of bloodstream infections among febrile adolescents and adults attending Yangon General Hospital, Yangon, Myanmar	Myat, T. O.; Oo, K. M.; Mone, H. K.; Htike, W. W.; Biswas, A.; Hannaway, R. F.; Murdoch, D. R.; Ussher, J. E.; Crump, J. A.	2020	Myat 2020	human	Oct 2015 - Oct 2016	Myanmar	hospital	Clinical samples	Salmonella spp.	Amoxicillin/clavulanic acid	0	0	33
A prospective study of bloodstream infections among febrile adolescents and adults attending Yangon General Hospital, Yangon, Myanmar	Myat, T. O.; Oo, K. M.; Mone, H. K.; Htike, W. W.; Biswas, A.; Hannaway, R. F.; Murdoch, D. R.; Ussher, J. E.; Crump, J. A.	2020	Myat 2020	human	Oct 2015 - Oct 2016	Myanmar	hospital	Clinical samples	Salmonella spp.	Amoxicillin/clavulanic acid	0	0	10
A prospective study of bloodstream infections among febrile adolescents and adults attending Yangon General Hospital, Yangon, Myanmar	Myat, T. O.; Oo, K. M.; Mone, H. K.; Htike, W. W.; Biswas, A.; Hannaway, R. F.; Murdoch, D. R.; Ussher, J. E.; Crump, J. A.	2020	Myat 2020	human	Oct 2015 - Oct 2016	Myanmar	hospital	Clinical samples	Escherichia coli	Ampicillin	0.95	19	20
A prospective study of bloodstream infections among febrile adolescents and adults attending Yangon General Hospital, Yangon, Myanmar	Myat, T. O.; Oo, K. M.; Mone, H. K.; Htike, W. W.; Biswas, A.; Hannaway, R. F.; Murdoch, D. R.; Ussher, J. E.; Crump, J. A.	2020	Myat 2020	human	Oct 2015 - Oct 2016	Myanmar	hospital	Clinical samples	Klebsiella pneumoniae	Ampicillin	0	0	7
A prospective study of bloodstream infections among febrile adolescents and adults attending Yangon General Hospital, Yangon, Myanmar	Myat, T. O.; Oo, K. M.; Mone, H. K.; Htike, W. W.; Biswas, A.; Hannaway, R. F.; Murdoch, D. R.; Ussher, J. E.; Crump, J. A.	2020	Myat 2020	human	Oct 2015 - Oct 2016	Myanmar	hospital	Clinical samples	Salmonella spp.	Ampicillin	0	0	33
A prospective study of bloodstream infections among febrile adolescents and adults attending Yangon General Hospital, Yangon, Myanmar	Myat, T. O.; Oo, K. M.; Mone, H. K.; Htike, W. W.; Biswas, A.; Hannaway, R. F.; Murdoch, D. R.; Ussher, J. E.; Crump, J. A.	2020	Myat 2020	human	Oct 2015 - Oct 2016	Myanmar	hospital	Clinical samples	Salmonella spp.	Ampicillin	0	0	10
A prospective study of bloodstream infections among febrile adolescents and adults attending Yangon General Hospital, Yangon, Myanmar	Myat, T. O.; Oo, K. M.; Mone, H. K.; Htike, W. W.; Biswas, A.; Hannaway, R. F.; Murdoch, D. R.; Ussher, J. E.; Crump, J. A.	2020	Myat 2020	human	Oct 2015 - Oct 2016	Myanmar	hospital	Clinical samples	Salmonella spp.	Azithromycin	0	0	33
A prospective study of bloodstream infections among febrile adolescents and adults attending Yangon General Hospital, Yangon, Myanmar	Myat, T. O.; Oo, K. M.; Mone, H. K.; Htike, W. W.; Biswas, A.; Hannaway, R. F.; Murdoch, D. R.; Ussher, J. E.; Crump, J. A.	2020	Myat 2020	human	Oct 2015 - Oct 2016	Myanmar	hospital	Clinical samples	Salmonella spp.	Azithromycin	0	0	10
A prospective study of bloodstream infections among febrile adolescents and adults attending Yangon General Hospital, Yangon, Myanmar	Myat, T. O.; Oo, K. M.; Mone, H. K.; Htike, W. W.; Biswas, A.; Hannaway, R. F.; Murdoch, D. R.; Ussher, J. E.; Crump, J. A.	2020	Myat 2020	human	Oct 2015 - Oct 2016	Myanmar	hospital	Clinical samples	Escherichia coli	Aztreonam	0.85	17	20
A prospective study of bloodstream infections among febrile adolescents and adults attending Yangon General Hospital, Yangon, Myanmar	Myat, T. O.; Oo, K. M.; Mone, H. K.; Htike, W. W.; Biswas, A.; Hannaway, R. F.; Murdoch, D. R.; Ussher, J. E.; Crump, J. A.	2020	Myat 2020	human	Oct 2015 - Oct 2016	Myanmar	hospital	Clinical samples	Klebsiella pneumoniae	Aztreonam	0.428571	3	7
A prospective study of bloodstream infections among febrile adolescents and adults attending Yangon General Hospital, Yangon, Myanmar	Myat, T. O.; Oo, K. M.; Mone, H. K.; Htike, W. W.; Biswas, A.; Hannaway, R. F.; Murdoch, D. R.; Ussher, J. E.; Crump, J. A.	2020	Myat 2020	human	Oct 2015 - Oct 2016	Myanmar	hospital	Clinical samples	Salmonella spp.	Aztreonam	0	0	33
A prospective study of bloodstream infections among febrile adolescents and adults attending Yangon General Hospital, Yangon, Myanmar	Myat, T. O.; Oo, K. M.; Mone, H. K.; Htike, W. W.; Biswas, A.; Hannaway, R. F.; Murdoch, D. R.; Ussher, J. E.; Crump, J. A.	2020	Myat 2020	human	Oct 2015 - Oct 2016	Myanmar	hospital	Clinical samples	Salmonella spp.	Aztreonam	0	0	10
A prospective study of bloodstream infections among febrile adolescents and adults attending Yangon General Hospital, Yangon, Myanmar	Myat, T. O.; Oo, K. M.; Mone, H. K.; Htike, W. W.; Biswas, A.; Hannaway, R. F.; Murdoch, D. R.; Ussher, J. E.; Crump, J. A.	2020	Myat 2020	human	Oct 2015 - Oct 2016	Myanmar	hospital	Clinical samples	Escherichia coli	Cefepime	0.85	17	20
A prospective study of bloodstream infections among febrile adolescents and adults attending Yangon General Hospital, Yangon, Myanmar	Myat, T. O.; Oo, K. M.; Mone, H. K.; Htike, W. W.; Biswas, A.; Hannaway, R. F.; Murdoch, D. R.; Ussher, J. E.; Crump, J. A.	2020	Myat 2020	human	Oct 2015 - Oct 2016	Myanmar	hospital	Clinical samples	Klebsiella pneumoniae	Cefepime	0.285714	2	7
A prospective study of bloodstream infections among febrile adolescents and adults attending Yangon General Hospital, Yangon, Myanmar	Myat, T. O.; Oo, K. M.; Mone, H. K.; Htike, W. W.; Biswas, A.; Hannaway, R. F.; Murdoch, D. R.; Ussher, J. E.; Crump, J. A.	2020	Myat 2020	human	Oct 2015 - Oct 2016	Myanmar	hospital	Clinical samples	Salmonella spp.	Cefepime	0	0	33
A prospective study of bloodstream infections among febrile adolescents and adults attending Yangon General Hospital, Yangon, Myanmar	Myat, T. O.; Oo, K. M.; Mone, H. K.; Htike, W. W.; Biswas, A.; Hannaway, R. F.; Murdoch, D. R.; Ussher, J. E.; Crump, J. A.	2020	Myat 2020	human	Oct 2015 - Oct 2016	Myanmar	hospital	Clinical samples	Salmonella spp.	Cefepime	0	0	10
A prospective study of bloodstream infections among febrile adolescents and adults attending Yangon General Hospital, Yangon, Myanmar	Myat, T. O.; Oo, K. M.; Mone, H. K.; Htike, W. W.; Biswas, A.; Hannaway, R. F.; Murdoch, D. R.; Ussher, J. E.; Crump, J. A.	2020	Myat 2020	human	Oct 2015 - Oct 2016	Myanmar	hospital	Clinical samples	Escherichia coli	Ceftazidime	0.8	16	20
A prospective study of bloodstream infections among febrile adolescents and adults attending Yangon General Hospital, Yangon, Myanmar	Myat, T. O.; Oo, K. M.; Mone, H. K.; Htike, W. W.; Biswas, A.; Hannaway, R. F.; Murdoch, D. R.; Ussher, J. E.; Crump, J. A.	2020	Myat 2020	human	Oct 2015 - Oct 2016	Myanmar	hospital	Clinical samples	Klebsiella pneumoniae	Ceftazidime	0.428571	3	7
A prospective study of bloodstream infections among febrile adolescents and adults attending Yangon General Hospital, Yangon, Myanmar	Myat, T. O.; Oo, K. M.; Mone, H. K.; Htike, W. W.; Biswas, A.; Hannaway, R. F.; Murdoch, D. R.; Ussher, J. E.; Crump, J. A.	2020	Myat 2020	human	Oct 2015 - Oct 2016	Myanmar	hospital	Clinical samples	Salmonella spp.	Ceftazidime	0	0	33
A prospective study of bloodstream infections among febrile adolescents and adults attending Yangon General Hospital, Yangon, Myanmar	Myat, T. O.; Oo, K. M.; Mone, H. K.; Htike, W. W.; Biswas, A.; Hannaway, R. F.; Murdoch, D. R.; Ussher, J. E.; Crump, J. A.	2020	Myat 2020	human	Oct 2015 - Oct 2016	Myanmar	hospital	Clinical samples	Salmonella spp.	Ceftazidime	0	0	10
A prospective study of bloodstream infections among febrile adolescents and adults attending Yangon General Hospital, Yangon, Myanmar	Myat, T. O.; Oo, K. M.; Mone, H. K.; Htike, W. W.; Biswas, A.; Hannaway, R. F.; Murdoch, D. R.; Ussher, J. E.; Crump, J. A.	2020	Myat 2020	human	Oct 2015 - Oct 2016	Myanmar	hospital	Clinical samples	Escherichia coli	Ceftriaxone	0.85	17	20
A prospective study of bloodstream infections among febrile adolescents and adults attending Yangon General Hospital, Yangon, Myanmar	Myat, T. O.; Oo, K. M.; Mone, H. K.; Htike, W. W.; Biswas, A.; Hannaway, R. F.; Murdoch, D. R.; Ussher, J. E.; Crump, J. A.	2020	Myat 2020	human	Oct 2015 - Oct 2016	Myanmar	hospital	Clinical samples	Klebsiella pneumoniae	Ceftriaxone	0.428571	3	7
A prospective study of bloodstream infections among febrile adolescents and adults attending Yangon General Hospital, Yangon, Myanmar	Myat, T. O.; Oo, K. M.; Mone, H. K.; Htike, W. W.; Biswas, A.; Hannaway, R. F.; Murdoch, D. R.; Ussher, J. E.; Crump, J. A.	2020	Myat 2020	human	Oct 2015 - Oct 2016	Myanmar	hospital	Clinical samples	Salmonella spp.	Ceftriaxone	0	0	33
A prospective study of bloodstream infections among febrile adolescents and adults attending Yangon General Hospital, Yangon, Myanmar	Myat, T. O.; Oo, K. M.; Mone, H. K.; Htike, W. W.; Biswas, A.; Hannaway, R. F.; Murdoch, D. R.; Ussher, J. E.; Crump, J. A.	2020	Myat 2020	human	Oct 2015 - Oct 2016	Myanmar	hospital	Clinical samples	Salmonella spp.	Ceftriaxone	0	0	10
A prospective study of bloodstream infections among febrile adolescents and adults attending Yangon General Hospital, Yangon, Myanmar	Myat, T. O.; Oo, K. M.; Mone, H. K.; Htike, W. W.; Biswas, A.; Hannaway, R. F.; Murdoch, D. R.; Ussher, J. E.; Crump, J. A.	2020	Myat 2020	human	Oct 2015 - Oct 2016	Myanmar	hospital	Clinical samples	Escherichia coli	Chloramphenicol	0.45	9	20
A prospective study of bloodstream infections among febrile adolescents and adults attending Yangon General Hospital, Yangon, Myanmar	Myat, T. O.; Oo, K. M.; Mone, H. K.; Htike, W. W.; Biswas, A.; Hannaway, R. F.; Murdoch, D. R.; Ussher, J. E.; Crump, J. A.	2020	Myat 2020	human	Oct 2015 - Oct 2016	Myanmar	hospital	Clinical samples	Klebsiella pneumoniae	Chloramphenicol	0.285714	2	7
A prospective study of bloodstream infections among febrile adolescents and adults attending Yangon General Hospital, Yangon, Myanmar	Myat, T. O.; Oo, K. M.; Mone, H. K.; Htike, W. W.; Biswas, A.; Hannaway, R. F.; Murdoch, D. R.; Ussher, J. E.; Crump, J. A.	2020	Myat 2020	human	Oct 2015 - Oct 2016	Myanmar	hospital	Clinical samples	Salmonella spp.	Chloramphenicol	0	0	33
A prospective study of bloodstream infections among febrile adolescents and adults attending Yangon General Hospital, Yangon, Myanmar	Myat, T. O.; Oo, K. M.; Mone, H. K.; Htike, W. W.; Biswas, A.; Hannaway, R. F.; Murdoch, D. R.; Ussher, J. E.; Crump, J. A.	2020	Myat 2020	human	Oct 2015 - Oct 2016	Myanmar	hospital	Clinical samples	Salmonella spp.	Chloramphenicol	0	0	10
A prospective study of bloodstream infections among febrile adolescents and adults attending Yangon General Hospital, Yangon, Myanmar	Myat, T. O.; Oo, K. M.; Mone, H. K.; Htike, W. W.; Biswas, A.; Hannaway, R. F.; Murdoch, D. R.; Ussher, J. E.; Crump, J. A.	2020	Myat 2020	human	Oct 2015 - Oct 2016	Myanmar	hospital	Clinical samples	Escherichia coli	Ciprofloxacin	0.8	16	20
A prospective study of bloodstream infections among febrile adolescents and adults attending Yangon General Hospital, Yangon, Myanmar	Myat, T. O.; Oo, K. M.; Mone, H. K.; Htike, W. W.; Biswas, A.; Hannaway, R. F.; Murdoch, D. R.; Ussher, J. E.; Crump, J. A.	2020	Myat 2020	human	Oct 2015 - Oct 2016	Myanmar	hospital	Clinical samples	Klebsiella pneumoniae	Ciprofloxacin	0.428571	3	7
A prospective study of bloodstream infections among febrile adolescents and adults attending Yangon General Hospital, Yangon, Myanmar	Myat, T. O.; Oo, K. M.; Mone, H. K.; Htike, W. W.; Biswas, A.; Hannaway, R. F.; Murdoch, D. R.; Ussher, J. E.; Crump, J. A.	2020	Myat 2020	human	Oct 2015 - Oct 2016	Myanmar	hospital	Clinical samples	Salmonella spp.	Ciprofloxacin	0	0	33
A prospective study of bloodstream infections among febrile adolescents and adults attending Yangon General Hospital, Yangon, Myanmar	Myat, T. O.; Oo, K. M.; Mone, H. K.; Htike, W. W.; Biswas, A.; Hannaway, R. F.; Murdoch, D. R.; Ussher, J. E.; Crump, J. A.	2020	Myat 2020	human	Oct 2015 - Oct 2016	Myanmar	hospital	Clinical samples	Salmonella spp.	Ciprofloxacin	0	0	10
A prospective study of bloodstream infections among febrile adolescents and adults attending Yangon General Hospital, Yangon, Myanmar	Myat, T. O.; Oo, K. M.; Mone, H. K.; Htike, W. W.; Biswas, A.; Hannaway, R. F.; Murdoch, D. R.; Ussher, J. E.; Crump, J. A.	2020	Myat 2020	human	Oct 2015 - Oct 2016	Myanmar	hospital	Clinical samples	Escherichia coli	Colistin	0	0	20
A prospective study of bloodstream infections among febrile adolescents and adults attending Yangon General Hospital, Yangon, Myanmar	Myat, T. O.; Oo, K. M.; Mone, H. K.; Htike, W. W.; Biswas, A.; Hannaway, R. F.; Murdoch, D. R.; Ussher, J. E.; Crump, J. A.	2020	Myat 2020	human	Oct 2015 - Oct 2016	Myanmar	hospital	Clinical samples	Klebsiella pneumoniae	Colistin	0	0	7
A prospective study of bloodstream infections among febrile adolescents and adults attending Yangon General Hospital, Yangon, Myanmar	Myat, T. O.; Oo, K. M.; Mone, H. K.; Htike, W. W.; Biswas, A.; Hannaway, R. F.; Murdoch, D. R.; Ussher, J. E.; Crump, J. A.	2020	Myat 2020	human	Oct 2015 - Oct 2016	Myanmar	hospital	Clinical samples	Salmonella spp.	Colistin	0	0	33
A prospective study of bloodstream infections among febrile adolescents and adults attending Yangon General Hospital, Yangon, Myanmar	Myat, T. O.; Oo, K. M.; Mone, H. K.; Htike, W. W.; Biswas, A.; Hannaway, R. F.; Murdoch, D. R.; Ussher, J. E.; Crump, J. A.	2020	Myat 2020	human	Oct 2015 - Oct 2016	Myanmar	hospital	Clinical samples	Salmonella spp.	Colistin	0	0	10
A prospective study of bloodstream infections among febrile adolescents and adults attending Yangon General Hospital, Yangon, Myanmar	Myat, T. O.; Oo, K. M.; Mone, H. K.; Htike, W. W.; Biswas, A.; Hannaway, R. F.; Murdoch, D. R.; Ussher, J. E.; Crump, J. A.	2020	Myat 2020	human	Oct 2015 - Oct 2016	Myanmar	hospital	Clinical samples	Escherichia coli	Ertapenem	0.05	1	20
A prospective study of bloodstream infections among febrile adolescents and adults attending Yangon General Hospital, Yangon, Myanmar	Myat, T. O.; Oo, K. M.; Mone, H. K.; Htike, W. W.; Biswas, A.; Hannaway, R. F.; Murdoch, D. R.; Ussher, J. E.; Crump, J. A.	2020	Myat 2020	human	Oct 2015 - Oct 2016	Myanmar	hospital	Clinical samples	Klebsiella pneumoniae	Ertapenem	0	0	7
A prospective study of bloodstream infections among febrile adolescents and adults attending Yangon General Hospital, Yangon, Myanmar	Myat, T. O.; Oo, K. M.; Mone, H. K.; Htike, W. W.; Biswas, A.; Hannaway, R. F.; Murdoch, D. R.; Ussher, J. E.; Crump, J. A.	2020	Myat 2020	human	Oct 2015 - Oct 2016	Myanmar	hospital	Clinical samples	Salmonella spp.	Ertapenem	0	0	33
A prospective study of bloodstream infections among febrile adolescents and adults attending Yangon General Hospital, Yangon, Myanmar	Myat, T. O.; Oo, K. M.; Mone, H. K.; Htike, W. W.; Biswas, A.; Hannaway, R. F.; Murdoch, D. R.; Ussher, J. E.; Crump, J. A.	2020	Myat 2020	human	Oct 2015 - Oct 2016	Myanmar	hospital	Clinical samples	Salmonella spp.	Ertapenem	0	0	10
A prospective study of bloodstream infections among febrile adolescents and adults attending Yangon General Hospital, Yangon, Myanmar	Myat, T. O.; Oo, K. M.; Mone, H. K.; Htike, W. W.; Biswas, A.; Hannaway, R. F.; Murdoch, D. R.; Ussher, J. E.; Crump, J. A.	2020	Myat 2020	human	Oct 2015 - Oct 2016	Myanmar	hospital	Clinical samples	Escherichia coli	Gentamicin	0.5	10	20
A prospective study of bloodstream infections among febrile adolescents and adults attending Yangon General Hospital, Yangon, Myanmar	Myat, T. O.; Oo, K. M.; Mone, H. K.; Htike, W. W.; Biswas, A.; Hannaway, R. F.; Murdoch, D. R.; Ussher, J. E.; Crump, J. A.	2020	Myat 2020	human	Oct 2015 - Oct 2016	Myanmar	hospital	Clinical samples	Klebsiella pneumoniae	Gentamicin	0.285714	2	7
A prospective study of bloodstream infections among febrile adolescents and adults attending Yangon General Hospital, Yangon, Myanmar	Myat, T. O.; Oo, K. M.; Mone, H. K.; Htike, W. W.; Biswas, A.; Hannaway, R. F.; Murdoch, D. R.; Ussher, J. E.; Crump, J. A.	2020	Myat 2020	human	Oct 2015 - Oct 2016	Myanmar	hospital	Clinical samples	Salmonella spp.	Gentamicin	0	0	33
A prospective study of bloodstream infections among febrile adolescents and adults attending Yangon General Hospital, Yangon, Myanmar	Myat, T. O.; Oo, K. M.; Mone, H. K.; Htike, W. W.; Biswas, A.; Hannaway, R. F.; Murdoch, D. R.; Ussher, J. E.; Crump, J. A.	2020	Myat 2020	human	Oct 2015 - Oct 2016	Myanmar	hospital	Clinical samples	Salmonella spp.	Gentamicin	0	0	10
A prospective study of bloodstream infections among febrile adolescents and adults attending Yangon General Hospital, Yangon, Myanmar	Myat, T. O.; Oo, K. M.; Mone, H. K.; Htike, W. W.; Biswas, A.; Hannaway, R. F.; Murdoch, D. R.; Ussher, J. E.; Crump, J. A.	2020	Myat 2020	human	Oct 2015 - Oct 2016	Myanmar	hospital	Clinical samples	Escherichia coli	Imipenem	0.05	1	20
A prospective study of bloodstream infections among febrile adolescents and adults attending Yangon General Hospital, Yangon, Myanmar	Myat, T. O.; Oo, K. M.; Mone, H. K.; Htike, W. W.; Biswas, A.; Hannaway, R. F.; Murdoch, D. R.; Ussher, J. E.; Crump, J. A.	2020	Myat 2020	human	Oct 2015 - Oct 2016	Myanmar	hospital	Clinical samples	Klebsiella pneumoniae	Imipenem	0	0	7
A prospective study of bloodstream infections among febrile adolescents and adults attending Yangon General Hospital, Yangon, Myanmar	Myat, T. O.; Oo, K. M.; Mone, H. K.; Htike, W. W.; Biswas, A.; Hannaway, R. F.; Murdoch, D. R.; Ussher, J. E.; Crump, J. A.	2020	Myat 2020	human	Oct 2015 - Oct 2016	Myanmar	hospital	Clinical samples	Salmonella spp.	Imipenem	0	0	33
A prospective study of bloodstream infections among febrile adolescents and adults attending Yangon General Hospital, Yangon, Myanmar	Myat, T. O.; Oo, K. M.; Mone, H. K.; Htike, W. W.; Biswas, A.; Hannaway, R. F.; Murdoch, D. R.; Ussher, J. E.; Crump, J. A.	2020	Myat 2020	human	Oct 2015 - Oct 2016	Myanmar	hospital	Clinical samples	Salmonella spp.	Imipenem	0	0	10
A prospective study of bloodstream infections among febrile adolescents and adults attending Yangon General Hospital, Yangon, Myanmar	Myat, T. O.; Oo, K. M.; Mone, H. K.; Htike, W. W.; Biswas, A.; Hannaway, R. F.; Murdoch, D. R.; Ussher, J. E.; Crump, J. A.	2020	Myat 2020	human	Oct 2015 - Oct 2016	Myanmar	hospital	Clinical samples	Escherichia coli	Meropenem	0.05	1	20
A prospective study of bloodstream infections among febrile adolescents and adults attending Yangon General Hospital, Yangon, Myanmar	Myat, T. O.; Oo, K. M.; Mone, H. K.; Htike, W. W.; Biswas, A.; Hannaway, R. F.; Murdoch, D. R.; Ussher, J. E.; Crump, J. A.	2020	Myat 2020	human	Oct 2015 - Oct 2016	Myanmar	hospital	Clinical samples	Klebsiella pneumoniae	Meropenem	0	0	7
A prospective study of bloodstream infections among febrile adolescents and adults attending Yangon General Hospital, Yangon, Myanmar	Myat, T. O.; Oo, K. M.; Mone, H. K.; Htike, W. W.; Biswas, A.; Hannaway, R. F.; Murdoch, D. R.; Ussher, J. E.; Crump, J. A.	2020	Myat 2020	human	Oct 2015 - Oct 2016	Myanmar	hospital	Clinical samples	Salmonella spp.	Meropenem	0	0	33
A prospective study of bloodstream infections among febrile adolescents and adults attending Yangon General Hospital, Yangon, Myanmar	Myat, T. O.; Oo, K. M.; Mone, H. K.; Htike, W. W.; Biswas, A.; Hannaway, R. F.; Murdoch, D. R.; Ussher, J. E.; Crump, J. A.	2020	Myat 2020	human	Oct 2015 - Oct 2016	Myanmar	hospital	Clinical samples	Salmonella spp.	Meropenem	0	0	10
A prospective study of bloodstream infections among febrile adolescents and adults attending Yangon General Hospital, Yangon, Myanmar	Myat, T. O.; Oo, K. M.; Mone, H. K.; Htike, W. W.; Biswas, A.; Hannaway, R. F.; Murdoch, D. R.; Ussher, J. E.; Crump, J. A.	2020	Myat 2020	human	Oct 2015 - Oct 2016	Myanmar	hospital	Clinical samples	Salmonella spp.	Nalidixic acid	0	0	33
A prospective study of bloodstream infections among febrile adolescents and adults attending Yangon General Hospital, Yangon, Myanmar	Myat, T. O.; Oo, K. M.; Mone, H. K.; Htike, W. W.; Biswas, A.; Hannaway, R. F.; Murdoch, D. R.; Ussher, J. E.; Crump, J. A.	2020	Myat 2020	human	Oct 2015 - Oct 2016	Myanmar	hospital	Clinical samples	Salmonella spp.	Nalidixic acid	0	0	10
A prospective study of bloodstream infections among febrile adolescents and adults attending Yangon General Hospital, Yangon, Myanmar	Myat, T. O.; Oo, K. M.; Mone, H. K.; Htike, W. W.; Biswas, A.; Hannaway, R. F.; Murdoch, D. R.; Ussher, J. E.; Crump, J. A.	2020	Myat 2020	human	Oct 2015 - Oct 2016	Myanmar	hospital	Clinical samples	Escherichia coli	Piperacillin/Tazobactam	0.3	6	20
A prospective study of bloodstream infections among febrile adolescents and adults attending Yangon General Hospital, Yangon, Myanmar	Myat, T. O.; Oo, K. M.; Mone, H. K.; Htike, W. W.; Biswas, A.; Hannaway, R. F.; Murdoch, D. R.; Ussher, J. E.; Crump, J. A.	2020	Myat 2020	human	Oct 2015 - Oct 2016	Myanmar	hospital	Clinical samples	Klebsiella pneumoniae	Piperacillin/Tazobactam	0.285714	2	7
A prospective study of bloodstream infections among febrile adolescents and adults attending Yangon General Hospital, Yangon, Myanmar	Myat, T. O.; Oo, K. M.; Mone, H. K.; Htike, W. W.; Biswas, A.; Hannaway, R. F.; Murdoch, D. R.; Ussher, J. E.; Crump, J. A.	2020	Myat 2020	human	Oct 2015 - Oct 2016	Myanmar	hospital	Clinical samples	Salmonella spp.	Piperacillin/Tazobactam	0	0	33
A prospective study of bloodstream infections among febrile adolescents and adults attending Yangon General Hospital, Yangon, Myanmar	Myat, T. O.; Oo, K. M.; Mone, H. K.; Htike, W. W.; Biswas, A.; Hannaway, R. F.; Murdoch, D. R.; Ussher, J. E.; Crump, J. A.	2020	Myat 2020	human	Oct 2015 - Oct 2016	Myanmar	hospital	Clinical samples	Salmonella spp.	Piperacillin/Tazobactam	0	0	10
A prospective study of bloodstream infections among febrile adolescents and adults attending Yangon General Hospital, Yangon, Myanmar	Myat, T. O.; Oo, K. M.; Mone, H. K.; Htike, W. W.; Biswas, A.; Hannaway, R. F.; Murdoch, D. R.; Ussher, J. E.; Crump, J. A.	2020	Myat 2020	human	Oct 2015 - Oct 2016	Myanmar	hospital	Clinical samples	Escherichia coli	Sulfamethoxazole/trimethoprim	0.75	15	20
A prospective study of bloodstream infections among febrile adolescents and adults attending Yangon General Hospital, Yangon, Myanmar	Myat, T. O.; Oo, K. M.; Mone, H. K.; Htike, W. W.; Biswas, A.; Hannaway, R. F.; Murdoch, D. R.; Ussher, J. E.; Crump, J. A.	2020	Myat 2020	human	Oct 2015 - Oct 2016	Myanmar	hospital	Clinical samples	Klebsiella pneumoniae	Sulfamethoxazole/trimethoprim	0.428571	3	7
A prospective study of bloodstream infections among febrile adolescents and adults attending Yangon General Hospital, Yangon, Myanmar	Myat, T. O.; Oo, K. M.; Mone, H. K.; Htike, W. W.; Biswas, A.; Hannaway, R. F.; Murdoch, D. R.; Ussher, J. E.; Crump, J. A.	2020	Myat 2020	human	Oct 2015 - Oct 2016	Myanmar	hospital	Clinical samples	Salmonella spp.	Sulfamethoxazole/trimethoprim	0	0	33
A prospective study of bloodstream infections among febrile adolescents and adults attending Yangon General Hospital, Yangon, Myanmar	Myat, T. O.; Oo, K. M.; Mone, H. K.; Htike, W. W.; Biswas, A.; Hannaway, R. F.; Murdoch, D. R.; Ussher, J. E.; Crump, J. A.	2020	Myat 2020	human	Oct 2015 - Oct 2016	Myanmar	hospital	Clinical samples	Salmonella spp.	Sulfamethoxazole/trimethoprim	0	0	10
A prospective study of bloodstream infections among febrile adolescents and adults attending Yangon General Hospital, Yangon, Myanmar	Myat, T. O.; Oo, K. M.; Mone, H. K.; Htike, W. W.; Biswas, A.; Hannaway, R. F.; Murdoch, D. R.; Ussher, J. E.; Crump, J. A.	2020	Myat 2020	human	Oct 2015 - Oct 2016	Myanmar	hospital	Clinical samples	Escherichia coli	Tetracycline	0.8	16	20
A prospective study of bloodstream infections among febrile adolescents and adults attending Yangon General Hospital, Yangon, Myanmar	Myat, T. O.; Oo, K. M.; Mone, H. K.; Htike, W. W.; Biswas, A.; Hannaway, R. F.; Murdoch, D. R.; Ussher, J. E.; Crump, J. A.	2020	Myat 2020	human	Oct 2015 - Oct 2016	Myanmar	hospital	Clinical samples	Klebsiella pneumoniae	Tetracycline	0.428571	3	7
A prospective study of bloodstream infections among febrile adolescents and adults attending Yangon General Hospital, Yangon, Myanmar	Myat, T. O.; Oo, K. M.; Mone, H. K.; Htike, W. W.; Biswas, A.; Hannaway, R. F.; Murdoch, D. R.; Ussher, J. E.; Crump, J. A.	2020	Myat 2020	human	Oct 2015 - Oct 2016	Myanmar	hospital	Clinical samples	Salmonella spp.	Tetracycline	0	0	33
A prospective study of bloodstream infections among febrile adolescents and adults attending Yangon General Hospital, Yangon, Myanmar	Myat, T. O.; Oo, K. M.; Mone, H. K.; Htike, W. W.; Biswas, A.; Hannaway, R. F.; Murdoch, D. R.; Ussher, J. E.; Crump, J. A.	2020	Myat 2020	human	Oct 2015 - Oct 2016	Myanmar	hospital	Clinical samples	Salmonella spp.	Tetracycline	0	0	10
A prospective study of bloodstream infections among febrile adolescents and adults attending Yangon General Hospital, Yangon, Myanmar	Myat, T. O.; Oo, K. M.; Mone, H. K.; Htike, W. W.; Biswas, A.; Hannaway, R. F.; Murdoch, D. R.; Ussher, J. E.; Crump, J. A.	2020	Myat 2020	human	Oct 2015 - Oct 2016	Myanmar	hospital	Clinical samples	Escherichia coli	Tigecycline	0	0	20
A prospective study of bloodstream infections among febrile adolescents and adults attending Yangon General Hospital, Yangon, Myanmar	Myat, T. O.; Oo, K. M.; Mone, H. K.; Htike, W. W.; Biswas, A.; Hannaway, R. F.; Murdoch, D. R.; Ussher, J. E.; Crump, J. A.	2020	Myat 2020	human	Oct 2015 - Oct 2016	Myanmar	hospital	Clinical samples	Klebsiella pneumoniae	Tigecycline	0.571429	4	7
A prospective study of bloodstream infections among febrile adolescents and adults attending Yangon General Hospital, Yangon, Myanmar	Myat, T. O.; Oo, K. M.; Mone, H. K.; Htike, W. W.; Biswas, A.; Hannaway, R. F.; Murdoch, D. R.; Ussher, J. E.; Crump, J. A.	2020	Myat 2020	human	Oct 2015 - Oct 2016	Myanmar	hospital	Clinical samples	Salmonella spp.	Tigecycline	0	0	33
A prospective study of bloodstream infections among febrile adolescents and adults attending Yangon General Hospital, Yangon, Myanmar	Myat, T. O.; Oo, K. M.; Mone, H. K.; Htike, W. W.; Biswas, A.; Hannaway, R. F.; Murdoch, D. R.; Ussher, J. E.; Crump, J. A.	2020	Myat 2020	human	Oct 2015 - Oct 2016	Myanmar	hospital	Clinical samples	Salmonella spp.	Tigecycline	0	0	10
A prospective study of bloodstream infections among febrile adolescents and adults attending Yangon General Hospital, Yangon, Myanmar	Myat, T. O.; Oo, K. M.; Mone, H. K.; Htike, W. W.; Biswas, A.; Hannaway, R. F.; Murdoch, D. R.; Ussher, J. E.; Crump, J. A.	2020	Myat 2020	human	Oct 2015 - Oct 2016	Myanmar	hospital	Clinical samples	Escherichia coli	Tobramycin	0.55	11	20
A prospective study of bloodstream infections among febrile adolescents and adults attending Yangon General Hospital, Yangon, Myanmar	Myat, T. O.; Oo, K. M.; Mone, H. K.; Htike, W. W.; Biswas, A.; Hannaway, R. F.; Murdoch, D. R.; Ussher, J. E.; Crump, J. A.	2020	Myat 2020	human	Oct 2015 - Oct 2016	Myanmar	hospital	Clinical samples	Klebsiella pneumoniae	Tobramycin	0.285714	2	7
A prospective study of bloodstream infections among febrile adolescents and adults attending Yangon General Hospital, Yangon, Myanmar	Myat, T. O.; Oo, K. M.; Mone, H. K.; Htike, W. W.; Biswas, A.; Hannaway, R. F.; Murdoch, D. R.; Ussher, J. E.; Crump, J. A.	2020	Myat 2020	human	Oct 2015 - Oct 2016	Myanmar	hospital	Clinical samples	Salmonella spp.	Tobramycin	0	0	33
A prospective study of bloodstream infections among febrile adolescents and adults attending Yangon General Hospital, Yangon, Myanmar	Myat, T. O.; Oo, K. M.; Mone, H. K.; Htike, W. W.; Biswas, A.; Hannaway, R. F.; Murdoch, D. R.; Ussher, J. E.; Crump, J. A.	2020	Myat 2020	human	Oct 2015 - Oct 2016	Myanmar	hospital	Clinical samples	Salmonella spp.	Tobramycin	0	0	10
Common presence of plasmid encoding bla(CTX-M-55) in extended-spectrum 尾-lactamase-producing Salmonella enterica and Escherichia coli isolates from the same edible river fish	Nakayama, T.; Shiori, Yamamoto; Natsuki, Ohata; Takahiro, Yamaguchi; Michio, Jinnai; Doan Tran Nguyen, Minh; Oanh Nguyen, Hoang; Hien, L. E. Thi; Phong Ngo, Thanh; Phuong Hoang, Hoai; Phuc Nguyen, D. O.; Chinh Dang, V. A. N.; Yuko, Kumeda; Atsushi, Hase	2023	Nakayama 2023	animal	2020	Vietnam	market	Other	Salmonella spp.	Ceftriaxone	0.0375	3	80
Common presence of plasmid encoding bla(CTX-M-55) in extended-spectrum 尾-lactamase-producing Salmonella enterica and Escherichia coli isolates from the same edible river fish	Nakayama, T.; Shiori, Yamamoto; Natsuki, Ohata; Takahiro, Yamaguchi; Michio, Jinnai; Doan Tran Nguyen, Minh; Oanh Nguyen, Hoang; Hien, L. E. Thi; Phong Ngo, Thanh; Phuong Hoang, Hoai; Phuc Nguyen, D. O.; Chinh Dang, V. A. N.; Yuko, Kumeda; Atsushi, Hase	2023	Nakayama 2023	animal	2020	Vietnam	market	Other	Salmonella spp.	Colistin	0.0125	1	80
Common presence of plasmid encoding bla(CTX-M-55) in extended-spectrum 尾-lactamase-producing Salmonella enterica and Escherichia coli isolates from the same edible river fish	Nakayama, T.; Shiori, Yamamoto; Natsuki, Ohata; Takahiro, Yamaguchi; Michio, Jinnai; Doan Tran Nguyen, Minh; Oanh Nguyen, Hoang; Hien, L. E. Thi; Phong Ngo, Thanh; Phuong Hoang, Hoai; Phuc Nguyen, D. O.; Chinh Dang, V. A. N.; Yuko, Kumeda; Atsushi, Hase	2023	Nakayama 2023	animal	2020	Vietnam	market	Other	Salmonella spp.	Meropenem	0	0	80
Antimicrobial resistance gene expression associated with multidrug resistant Salmonella spp. isolated from retail meat in Hanoi, Vietnam	Nghiem, M. N.; Nguyen, V. T.; Nguyen, T. T. H.; Nguyen, T. D.; Vo, T. T. B.	2017	Nghiem 2017	food	2016	Vietnam	market	Food samples	Salmonella spp.	Ampicillin	0.25	1	4
Antimicrobial resistance gene expression associated with multidrug resistant Salmonella spp. isolated from retail meat in Hanoi, Vietnam	Nghiem, M. N.; Nguyen, V. T.; Nguyen, T. T. H.; Nguyen, T. D.; Vo, T. T. B.	2017	Nghiem 2017	food	2016	Vietnam	market	Food samples	Salmonella spp.	Ampicillin	0.555556	5	9
Antimicrobial resistance gene expression associated with multidrug resistant Salmonella spp. isolated from retail meat in Hanoi, Vietnam	Nghiem, M. N.; Nguyen, V. T.; Nguyen, T. T. H.; Nguyen, T. D.; Vo, T. T. B.	2017	Nghiem 2017	food	2016	Vietnam	market	Food samples	Salmonella spp.	Ampicillin	1	1	1
Antimicrobial resistance gene expression associated with multidrug resistant Salmonella spp. isolated from retail meat in Hanoi, Vietnam	Nghiem, M. N.; Nguyen, V. T.; Nguyen, T. T. H.; Nguyen, T. D.; Vo, T. T. B.	2017	Nghiem 2017	food	2016	Vietnam	market	Food samples	Salmonella spp.	Ceftazidime	0	0	4
Antimicrobial resistance gene expression associated with multidrug resistant Salmonella spp. isolated from retail meat in Hanoi, Vietnam	Nghiem, M. N.; Nguyen, V. T.; Nguyen, T. T. H.; Nguyen, T. D.; Vo, T. T. B.	2017	Nghiem 2017	food	2016	Vietnam	market	Food samples	Salmonella spp.	Ceftazidime	0	0	9
Antimicrobial resistance gene expression associated with multidrug resistant Salmonella spp. isolated from retail meat in Hanoi, Vietnam	Nghiem, M. N.; Nguyen, V. T.; Nguyen, T. T. H.; Nguyen, T. D.; Vo, T. T. B.	2017	Nghiem 2017	food	2016	Vietnam	market	Food samples	Salmonella spp.	Ceftazidime	0	0	1
Antimicrobial resistance gene expression associated with multidrug resistant Salmonella spp. isolated from retail meat in Hanoi, Vietnam	Nghiem, M. N.; Nguyen, V. T.; Nguyen, T. T. H.; Nguyen, T. D.; Vo, T. T. B.	2017	Nghiem 2017	food	2016	Vietnam	market	Food samples	Salmonella spp.	Chloramphenicol	1	4	4
Antimicrobial resistance gene expression associated with multidrug resistant Salmonella spp. isolated from retail meat in Hanoi, Vietnam	Nghiem, M. N.; Nguyen, V. T.; Nguyen, T. T. H.; Nguyen, T. D.; Vo, T. T. B.	2017	Nghiem 2017	food	2016	Vietnam	market	Food samples	Salmonella spp.	Chloramphenicol	0.555556	5	9
Antimicrobial resistance gene expression associated with multidrug resistant Salmonella spp. isolated from retail meat in Hanoi, Vietnam	Nghiem, M. N.; Nguyen, V. T.; Nguyen, T. T. H.; Nguyen, T. D.; Vo, T. T. B.	2017	Nghiem 2017	food	2016	Vietnam	market	Food samples	Salmonella spp.	Chloramphenicol	1	1	1
Antimicrobial resistance gene expression associated with multidrug resistant Salmonella spp. isolated from retail meat in Hanoi, Vietnam	Nghiem, M. N.; Nguyen, V. T.; Nguyen, T. T. H.; Nguyen, T. D.; Vo, T. T. B.	2017	Nghiem 2017	food	2016	Vietnam	market	Food samples	Salmonella spp.	Ciprofloxacin	0.25	1	4
Antimicrobial resistance gene expression associated with multidrug resistant Salmonella spp. isolated from retail meat in Hanoi, Vietnam	Nghiem, M. N.; Nguyen, V. T.; Nguyen, T. T. H.; Nguyen, T. D.; Vo, T. T. B.	2017	Nghiem 2017	food	2016	Vietnam	market	Food samples	Salmonella spp.	Ciprofloxacin	0	0	9
Antimicrobial resistance gene expression associated with multidrug resistant Salmonella spp. isolated from retail meat in Hanoi, Vietnam	Nghiem, M. N.; Nguyen, V. T.; Nguyen, T. T. H.; Nguyen, T. D.; Vo, T. T. B.	2017	Nghiem 2017	food	2016	Vietnam	market	Food samples	Salmonella spp.	Ciprofloxacin	0	0	1
Antimicrobial resistance gene expression associated with multidrug resistant Salmonella spp. isolated from retail meat in Hanoi, Vietnam	Nghiem, M. N.; Nguyen, V. T.; Nguyen, T. T. H.; Nguyen, T. D.; Vo, T. T. B.	2017	Nghiem 2017	food	2016	Vietnam	market	Food samples	Salmonella spp.	Gentamicin	0.25	1	4
Antimicrobial resistance gene expression associated with multidrug resistant Salmonella spp. isolated from retail meat in Hanoi, Vietnam	Nghiem, M. N.; Nguyen, V. T.; Nguyen, T. T. H.; Nguyen, T. D.; Vo, T. T. B.	2017	Nghiem 2017	food	2016	Vietnam	market	Food samples	Salmonella spp.	Gentamicin	0.111111	1	9
Antimicrobial resistance gene expression associated with multidrug resistant Salmonella spp. isolated from retail meat in Hanoi, Vietnam	Nghiem, M. N.; Nguyen, V. T.; Nguyen, T. T. H.; Nguyen, T. D.; Vo, T. T. B.	2017	Nghiem 2017	food	2016	Vietnam	market	Food samples	Salmonella spp.	Gentamicin	0	0	1
Antimicrobial resistance gene expression associated with multidrug resistant Salmonella spp. isolated from retail meat in Hanoi, Vietnam	Nghiem, M. N.; Nguyen, V. T.; Nguyen, T. T. H.; Nguyen, T. D.; Vo, T. T. B.	2017	Nghiem 2017	food	2016	Vietnam	market	Food samples	Salmonella spp.	Streptomycin	0.5	2	4
Antimicrobial resistance gene expression associated with multidrug resistant Salmonella spp. isolated from retail meat in Hanoi, Vietnam	Nghiem, M. N.; Nguyen, V. T.; Nguyen, T. T. H.; Nguyen, T. D.; Vo, T. T. B.	2017	Nghiem 2017	food	2016	Vietnam	market	Food samples	Salmonella spp.	Streptomycin	0.888889	8	9
Antimicrobial resistance gene expression associated with multidrug resistant Salmonella spp. isolated from retail meat in Hanoi, Vietnam	Nghiem, M. N.; Nguyen, V. T.; Nguyen, T. T. H.; Nguyen, T. D.; Vo, T. T. B.	2017	Nghiem 2017	food	2016	Vietnam	market	Food samples	Salmonella spp.	Streptomycin	1	1	1
Antimicrobial resistance gene expression associated with multidrug resistant Salmonella spp. isolated from retail meat in Hanoi, Vietnam	Nghiem, M. N.; Nguyen, V. T.; Nguyen, T. T. H.; Nguyen, T. D.; Vo, T. T. B.	2017	Nghiem 2017	food	2016	Vietnam	market	Food samples	Salmonella spp.	Sulfamethoxazole/trimethoprim	0.75	3	4
Antimicrobial resistance gene expression associated with multidrug resistant Salmonella spp. isolated from retail meat in Hanoi, Vietnam	Nghiem, M. N.; Nguyen, V. T.; Nguyen, T. T. H.; Nguyen, T. D.; Vo, T. T. B.	2017	Nghiem 2017	food	2016	Vietnam	market	Food samples	Salmonella spp.	Sulfamethoxazole/trimethoprim	0.333333	3	9
Antimicrobial resistance gene expression associated with multidrug resistant Salmonella spp. isolated from retail meat in Hanoi, Vietnam	Nghiem, M. N.; Nguyen, V. T.; Nguyen, T. T. H.; Nguyen, T. D.; Vo, T. T. B.	2017	Nghiem 2017	food	2016	Vietnam	market	Food samples	Salmonella spp.	Sulfamethoxazole/trimethoprim	1	1	1
Antimicrobial resistance gene expression associated with multidrug resistant Salmonella spp. isolated from retail meat in Hanoi, Vietnam	Nghiem, M. N.; Nguyen, V. T.; Nguyen, T. T. H.; Nguyen, T. D.; Vo, T. T. B.	2017	Nghiem 2017	food	2016	Vietnam	market	Food samples	Salmonella spp.	Tetracycline	0.75	3	4
Antimicrobial resistance gene expression associated with multidrug resistant Salmonella spp. isolated from retail meat in Hanoi, Vietnam	Nghiem, M. N.; Nguyen, V. T.; Nguyen, T. T. H.; Nguyen, T. D.; Vo, T. T. B.	2017	Nghiem 2017	food	2016	Vietnam	market	Food samples	Salmonella spp.	Tetracycline	0.777778	7	9
Antimicrobial resistance gene expression associated with multidrug resistant Salmonella spp. isolated from retail meat in Hanoi, Vietnam	Nghiem, M. N.; Nguyen, V. T.; Nguyen, T. T. H.; Nguyen, T. D.; Vo, T. T. B.	2017	Nghiem 2017	food	2016	Vietnam	market	Food samples	Salmonella spp.	Tetracycline	1	1	1
<i>Pangasius </i>Hypophthalmus Viscera as A Potential Vector of Bacterial Cross-Contamination and Resistance of<i> Escherichia Coli</i> to Antibiotics	Ngoc, T. T. A.; Tu, N. C.; Trang, P. N.; Duy, L. N. D.; Ha, N. C.; Miyamoto, T.	2022	Ngoc 2022	animal	2018-2020	Vietnam	others	Other	Escherichia coli	Ampicillin	0.65	36	55
<i>Pangasius </i>Hypophthalmus Viscera as A Potential Vector of Bacterial Cross-Contamination and Resistance of<i> Escherichia Coli</i> to Antibiotics	Ngoc, T. T. A.; Tu, N. C.; Trang, P. N.; Duy, L. N. D.; Ha, N. C.; Miyamoto, T.	2022	Ngoc 2022	animal	2018-2020	Vietnam	others	Other	Escherichia coli	Cefotaxime	0.65	36	55
<i>Pangasius </i>Hypophthalmus Viscera as A Potential Vector of Bacterial Cross-Contamination and Resistance of<i> Escherichia Coli</i> to Antibiotics	Ngoc, T. T. A.; Tu, N. C.; Trang, P. N.; Duy, L. N. D.; Ha, N. C.; Miyamoto, T.	2022	Ngoc 2022	animal	2018-2020	Vietnam	others	Other	Escherichia coli	Cefoxitin	0.35	19	55
<i>Pangasius </i>Hypophthalmus Viscera as A Potential Vector of Bacterial Cross-Contamination and Resistance of<i> Escherichia Coli</i> to Antibiotics	Ngoc, T. T. A.; Tu, N. C.; Trang, P. N.; Duy, L. N. D.; Ha, N. C.; Miyamoto, T.	2022	Ngoc 2022	animal	2018-2020	Vietnam	others	Other	Escherichia coli	Ceftazidime	0.7	39	55
<i>Pangasius </i>Hypophthalmus Viscera as A Potential Vector of Bacterial Cross-Contamination and Resistance of<i> Escherichia Coli</i> to Antibiotics	Ngoc, T. T. A.; Tu, N. C.; Trang, P. N.; Duy, L. N. D.; Ha, N. C.; Miyamoto, T.	2022	Ngoc 2022	animal	2018-2020	Vietnam	others	Other	Escherichia coli	Chloramphenicol	0.55	30	55
<i>Pangasius </i>Hypophthalmus Viscera as A Potential Vector of Bacterial Cross-Contamination and Resistance of<i> Escherichia Coli</i> to Antibiotics	Ngoc, T. T. A.; Tu, N. C.; Trang, P. N.; Duy, L. N. D.; Ha, N. C.; Miyamoto, T.	2022	Ngoc 2022	animal	2018-2020	Vietnam	others	Other	Escherichia coli	Ciprofloxacin	0.8	44	55
<i>Pangasius </i>Hypophthalmus Viscera as A Potential Vector of Bacterial Cross-Contamination and Resistance of<i> Escherichia Coli</i> to Antibiotics	Ngoc, T. T. A.; Tu, N. C.; Trang, P. N.; Duy, L. N. D.; Ha, N. C.; Miyamoto, T.	2022	Ngoc 2022	animal	2018-2020	Vietnam	others	Other	Escherichia coli	Fosfomycin	0.15	8	55
<i>Pangasius </i>Hypophthalmus Viscera as A Potential Vector of Bacterial Cross-Contamination and Resistance of<i> Escherichia Coli</i> to Antibiotics	Ngoc, T. T. A.; Tu, N. C.; Trang, P. N.; Duy, L. N. D.; Ha, N. C.; Miyamoto, T.	2022	Ngoc 2022	animal	2018-2020	Vietnam	others	Other	Escherichia coli	Gentamicin	0.7	39	55
<i>Pangasius </i>Hypophthalmus Viscera as A Potential Vector of Bacterial Cross-Contamination and Resistance of<i> Escherichia Coli</i> to Antibiotics	Ngoc, T. T. A.; Tu, N. C.; Trang, P. N.; Duy, L. N. D.; Ha, N. C.; Miyamoto, T.	2022	Ngoc 2022	animal	2018-2020	Vietnam	others	Other	Escherichia coli	Kanamycin	0.5	28	55
<i>Pangasius </i>Hypophthalmus Viscera as A Potential Vector of Bacterial Cross-Contamination and Resistance of<i> Escherichia Coli</i> to Antibiotics	Ngoc, T. T. A.; Tu, N. C.; Trang, P. N.; Duy, L. N. D.; Ha, N. C.; Miyamoto, T.	2022	Ngoc 2022	animal	2018-2020	Vietnam	others	Other	Escherichia coli	Meropenem	0.35	19	55
<i>Pangasius </i>Hypophthalmus Viscera as A Potential Vector of Bacterial Cross-Contamination and Resistance of<i> Escherichia Coli</i> to Antibiotics	Ngoc, T. T. A.; Tu, N. C.; Trang, P. N.; Duy, L. N. D.; Ha, N. C.; Miyamoto, T.	2022	Ngoc 2022	animal	2018-2020	Vietnam	others	Other	Escherichia coli	Nalidixic acid	0.8	44	55
<i>Pangasius </i>Hypophthalmus Viscera as A Potential Vector of Bacterial Cross-Contamination and Resistance of<i> Escherichia Coli</i> to Antibiotics	Ngoc, T. T. A.; Tu, N. C.; Trang, P. N.; Duy, L. N. D.; Ha, N. C.; Miyamoto, T.	2022	Ngoc 2022	animal	2018-2020	Vietnam	others	Other	Escherichia coli	Streptomycin	0.7	39	55
<i>Pangasius </i>Hypophthalmus Viscera as A Potential Vector of Bacterial Cross-Contamination and Resistance of<i> Escherichia Coli</i> to Antibiotics	Ngoc, T. T. A.; Tu, N. C.; Trang, P. N.; Duy, L. N. D.; Ha, N. C.; Miyamoto, T.	2022	Ngoc 2022	animal	2018-2020	Vietnam	others	Other	Escherichia coli	Sulfamethoxazole/trimethoprim	0.8	44	55
<i>Pangasius </i>Hypophthalmus Viscera as A Potential Vector of Bacterial Cross-Contamination and Resistance of<i> Escherichia Coli</i> to Antibiotics	Ngoc, T. T. A.; Tu, N. C.; Trang, P. N.; Duy, L. N. D.; Ha, N. C.; Miyamoto, T.	2022	Ngoc 2022	animal	2018-2020	Vietnam	others	Other	Escherichia coli	Tetracycline	0.6	33	55
Prevalence, Serovar, and Antimicrobial Resistance of Nontyphoidal Salmonella in Vegetable, Fruit, and Water Samples in Ho Chi Minh City, Vietnam	Nguyen, D. T. A.; Awasthi, S. P.; Hoang, P. H.; Nguyen, P. D.; Jayedul, H.; Hatanaka, N.; Hinenoya, A.; Van Dang, C.; Faruque, S. M.; Yamasaki, S.	2021	Nguyen 2021	environmental	June to July 2016	Vietnam	market	Water samples	Salmonella spp.	Ampicillin	0.342857	12	35
Prevalence, Serovar, and Antimicrobial Resistance of Nontyphoidal Salmonella in Vegetable, Fruit, and Water Samples in Ho Chi Minh City, Vietnam	Nguyen, D. T. A.; Awasthi, S. P.; Hoang, P. H.; Nguyen, P. D.; Jayedul, H.; Hatanaka, N.; Hinenoya, A.; Van Dang, C.; Faruque, S. M.; Yamasaki, S.	2021	Nguyen 2021	food	June to July 2016	Vietnam	market	Food samples	Salmonella spp.	Ampicillin	0.477612	32	67
Prevalence, Serovar, and Antimicrobial Resistance of Nontyphoidal Salmonella in Vegetable, Fruit, and Water Samples in Ho Chi Minh City, Vietnam	Nguyen, D. T. A.; Awasthi, S. P.; Hoang, P. H.; Nguyen, P. D.; Jayedul, H.; Hatanaka, N.; Hinenoya, A.; Van Dang, C.; Faruque, S. M.; Yamasaki, S.	2021	Nguyen 2021	environmental	June to July 2016	Vietnam	market	Water samples	Salmonella spp.	Cefotaxime	0	0	35
Prevalence, Serovar, and Antimicrobial Resistance of Nontyphoidal Salmonella in Vegetable, Fruit, and Water Samples in Ho Chi Minh City, Vietnam	Nguyen, D. T. A.; Awasthi, S. P.; Hoang, P. H.; Nguyen, P. D.; Jayedul, H.; Hatanaka, N.; Hinenoya, A.; Van Dang, C.; Faruque, S. M.; Yamasaki, S.	2021	Nguyen 2021	food	June to July 2016	Vietnam	market	Food samples	Salmonella spp.	Cefotaxime	0.0149254	1	67
Prevalence, Serovar, and Antimicrobial Resistance of Nontyphoidal Salmonella in Vegetable, Fruit, and Water Samples in Ho Chi Minh City, Vietnam	Nguyen, D. T. A.; Awasthi, S. P.; Hoang, P. H.; Nguyen, P. D.; Jayedul, H.; Hatanaka, N.; Hinenoya, A.; Van Dang, C.; Faruque, S. M.; Yamasaki, S.	2021	Nguyen 2021	environmental	June to July 2016	Vietnam	market	Water samples	Salmonella spp.	Ceftazidime	0	0	35
Prevalence, Serovar, and Antimicrobial Resistance of Nontyphoidal Salmonella in Vegetable, Fruit, and Water Samples in Ho Chi Minh City, Vietnam	Nguyen, D. T. A.; Awasthi, S. P.; Hoang, P. H.; Nguyen, P. D.; Jayedul, H.; Hatanaka, N.; Hinenoya, A.; Van Dang, C.; Faruque, S. M.; Yamasaki, S.	2021	Nguyen 2021	food	June to July 2016	Vietnam	market	Food samples	Salmonella spp.	Ceftazidime	0.0149254	1	67
Prevalence, Serovar, and Antimicrobial Resistance of Nontyphoidal Salmonella in Vegetable, Fruit, and Water Samples in Ho Chi Minh City, Vietnam	Nguyen, D. T. A.; Awasthi, S. P.; Hoang, P. H.; Nguyen, P. D.; Jayedul, H.; Hatanaka, N.; Hinenoya, A.; Van Dang, C.; Faruque, S. M.; Yamasaki, S.	2021	Nguyen 2021	environmental	June to July 2016	Vietnam	market	Water samples	Salmonella spp.	Chloramphenicol	0.342857	12	35
[truncated: 1,702 more rows]

## Sheet: Table S2
	Study sector
Study title	Human	Animal	Environment	Food	Investigate contact's role in AMR transmission across sectors.
[truncated: 30 more rows]

## Sheet: Table S3
Title	Authors	Year	Journal	Study	Sector	Study Period (StartDate/EndDate)	Country	Setting	Sample	Bacteria	Class	Proportion	Resistant isolates (n)	Isolates (N)
[truncated: 2,442 more rows]

[truncated: 5 more sheets: Table S4, Table S5, Table S6, Table S7, Table S8]
